# Supplementary material for: Personality, Gender, and Age in the Language of Social Media: The Open-Vocabulary Approach
Source: PLoS One. 2013 Sep 25;8(9):e73791. doi: 10.1371/journal.pone.0073791 (PMC3783449; doi:10.1371/journal.pone.0073791)
Supplement: Table S1 — The 15 most prevalent words for the 2000 automatically generated topics used in our study. All topics available here: wwbp.org/public_data/2000topics.top20freqs.keys.csv. (XLS) [file pone.0073791.s003.xls]

## Sheet: Sheet1
Supporting Table 1: The 20 most prevalent words and their frequencies for each of our 2000 LDA topics.
category	term1	w1	term2	w2	...
643	teeth	15750	wisdom	6665	tooth	6568	dentist	6261	mouth	3167	pulled	2974	braces	2021	brush	2015	pain	1981	root	1218	removed	1007	numb	875	jaw	825	surgery	485	ouch	473	filling	424	appointment	350	bottom	349	fairy	344	swollen	308
592	hannah	7890	montana	2649	becky	1127	hanging	973	graham	629	jo	446	emily	334	babysitting	282	heather	216	emma	188	gee	165	drake	124	mann	124	alyssa	101	chloe	96	lily	86	watson	83	miranda	83	olivia	74	babysit	42
344	rise	8305	sun	5326	fall	3649	shine	2218	ashes	1595	meet	1402	fields	1248	phoenix	1233	wind	753	we'll	586	lions	585	strawberry	387	grind	381	soft	328	rising	293	occasion	187	rains	182	shadows	171	seasons	135	refuse	127
345	pretty	15785	cool	9798	awesome	3281	thinks	2086	kinda	1367	legit	1017	badass	1012	neat	829	sounds	622	swell	234	darn	212	hiccups	189	admit	183	basically	157	ipad	101	wardrobe	24
346	time	13768	long	3487	nice	2489	harris	1067	fu	307	japanese	214	hook	87	chi	86	mei	78	mitchell	43
347	watch	34061	movie	7030	gonna	5562	movies	4164	sit	4042	tv	3418	relax	1407	lay	1025	eat	1011	couch	1000	cuddle	916	chill	873	bout	764	snuggle	576	curl	426	cartoons	320	popcorn	315	hubby	304	forced	248	dvd	229
340	butter	9669	peanut	7796	jelly	4496	eating	2023	sandwich	1537	bread	1103	beans	993	chocolate	948	crackers	891	toast	867	ate	783	jam	677	jar	632	honey	587	cookies	563	graham	507	bean	507	sandwiches	468	taste	464	cups	458
341	barn	3095	friend	3053	raising	1857	chicken	1607	read	1206	click	1122	farmville	931	terms	894	offensive	883	helped	861	chickens	766	site	744	bigger	737	service	720	lend	633	attention	630	notification	577	helping	575	reported	553	virus	529
342	haha	1810	sat	913	flipping	682	:\	292	flags	290	-_-	257	uhhh	247	liking	197	messy	180	haven	144	urgh	137	torture	131	tommorrow	126	ftw	114	personally	99	:o	97	yawn	81	tool	78	magical	76	minus	74
343	mind	36438	thoughts	3191	blown	2080	clear	2067	blow	1988	state	1962	what's	1650	whats	1446	blew	1177	wouldn't	1097	blowing	1093	blows	983	changed	979	blank	625	racing	564	ease	558	inception	429	wandering	334	wander	331	tricks	325
348	i'm	25032	addicted	9056	officially	4198	obsessed	1913	totally	1223	hooked	972	admit	571	trouble	513	addict	409	addiction	256	tumblr	121	offically	115	obsession	115	ridiculously	106	sims	105	adore	89	addicting	62	thrill	59	slipping	57	practically	50
349	weekend	25106	forward	7842	long	5301	week	4665	great	3119	relaxing	1951	spending	1040	plans	552	tgif	529	recover	490	eventful	411	recovering	363	productive	335	enjoying	328	exhausting	194	enjoyable	164	foward	143	extended	61	looong	36	festivities	35
594	dam	8639	hate	5570	emo	3522	argh	3186	stupid	1834	>:	1592	fucking	1491	wtf	1055	sucks	1052	freaking	1049	bloody	681	annoying	491	dammit	430	grrrrrr	373	friggin	353	-.-	318	grrrrrrr	296	grrrrr	236	jeez	205	geez	191
298	boom	10537	beard	3416	shave	2548	mustache	1298	ronnie	1262	james	1098	grow	1022	shaved	1017	legs	968	corey	910	eyebrows	875	cherry	759	chin	725	november	723	growing	722	haircut	687	shaving	671	boo	630	rip	466	dynamite	314
299	goodbye	20114	miss	4557	farewell	2832	leaving	1356	meet	1347	bid	1031	goodbyes	1006	kiss	795	wave	566	lover	488	painful	422	bittersweet	291	fond	256	lovers	227	hopeless	223	waving	195	heartache	188	beloved	150	alas	130	romance	122
296	left	32481	days	6845	side	1991	speechless	1426	handed	1038	dead	888	longest	511	undone	432	building	355	somethings	340	leaves	254	abandoned	119	stranded	71	deeds	69	elvis	65	locker	64	exit	43
297	yep	8804	yup	7016	that's	6636	guess	3092	yeah	2508	officially	1033	nope	662	hmm	649	definately	599	basically	380	typical	336	guessed	245	def	150	ummm	121
294	meant	15123	things	5184	thought	2798	happen	2385	guess	2291	wasn't	1447	knew	1443	wanted	1293	aren't	1228	ment	1026	supposed	821	naturally	641	weren't	618	oops	569	wasnt	552	expect	531	assume	508	realizing	466	suppose	426	somethings	403
295	energy	15268	drink	4816	drinks	3154	full	1508	coffee	1243	monster	956	feelin	824	gettin	672	poppin	623	hyper	620	bottles	596	blizzard	584	caffeine	518	boost	497	pack	458	redbull	444	drained	402	rockstar	357	hr	357	drain	284
292	dj	5374	party	4905	free	4734	club	2162	drinks	1855	pm	1448	drink	1278	lounge	1246	ladies	1192	bar	932	vip	691	guest	686	entry	577	event	561	cover	529	tonite	523	bash	437	midnight	375	entertainment	358	hottest	331
293	kisses	4932	hugs	4793	calls	2505	guy	2243	beautiful	2070	hang	1577	thinks	1513	lucky	1202	constantly	1145	turns	1109	holds	990	cares	908	reminding	772	front	770	awake	731	lie	728	forehead	703	stars	487	makeup	468	hug	416
290	heat	12011	hot	8846	degrees	7134	weather	2864	cold	2525	ac	2146	summer	2121	degree	1765	temperature	1695	cool	1472	wave	1281	humidity	1247	temp	1121	hotter	936	air	908	sweating	903	sweat	854	freezing	714	cooler	701	humid	692
291	shake	11840	hands	2187	shaking	1810	booty	1619	move	1549	shakes	1346	fist	1192	steak	1069	drop	670	floor	513	bend	506	knees	491	loose	415	shook	332	hips	318	bake	283	push	276	earthquake	258	wipe	249	rockin	204
270	make	24338	option	4604	priority	2519	happiest	913	allowing	834	necessarily	595	refuse	594	wrongs	446	options	247	personally	162	treats	144	priorities	50	resort	48
271	hot	41450	chocolate	5078	cocoa	1525	dogs	1419	mess	1145	topic	1002	coco	903	chili	777	drinking	713	tub	704	peppers	619	springs	572	sweaty	569	humid	541	sauce	505	chilli	505	pocket	366	pockets	349	sticky	285	rod	261
272	:d	42606	dd	3990	;d	1706	ddd	1486	>:d	474	d:	389	8d	330	ftw	223	yayyy	218	yayyyy	184	yayy	175	yaaay	162	logged	128	woooooo	121	woooo	103	rofl	102	^.^	99	yess	57
273	food	16771	chinese	9086	restaurant	3796	mexican	3052	dinner	2679	eat	2350	eating	1688	thai	1674	lunch	1425	ate	1415	indian	1298	japanese	1282	asian	1231	buffet	1169	italian	1101	china	782	yummy	735	korean	675	sushi	616	delicious	558
274	weight	11062	lose	8047	lost	7614	pounds	5212	gain	4618	lbs	3698	gained	2612	loss	2301	loose	1578	losing	1500	diet	1479	fat	1270	pound	1046	weigh	967	goal	815	scale	774	total	752	exercise	682	heavy	487	beginning	477
275	idea	23978	good	12748	bad	8236	thought	1817	sounds	1169	decided	1093	brilliant	970	wasn't	727	wasnt	466	sounded	216	genius	129	concept	95	nooo	85	brightest	80	cities	75	noooo	73	clever	73	smartest	67	it'd	62	forgets	60
276	great	19732	friends	10704	family	10654	time	10516	weekend	9012	wonderful	3312	spend	1677	spent	1340	visiting	1122	spending	668	catching	604	hanging	478	reunion	333	fam	315	fabulous	193	extended	55	tp	47
277	strength	5197	overcome	2372	faith	2012	challenges	1833	strong	1776	trials	1664	courage	1512	obstacles	1232	stronger	1130	power	1119	peace	1094	endure	1040	struggle	1002	struggles	974	greater	827	problems	798	weakness	794	facing	756	difficulties	745	surrender	729
278	week	17304	days	8744	work	5710	school	5477	weeks	4702	starting	2412	till	2099	yay	1478	holiday	1087	holidays	1076	half	709	wednesday	592	schedule	538	stressful	476	hectic	431	yikes	367	yippee	284	craziness	209	untill	152	yipee	137
279	idiot	6660	loser	6172	biggest	5435	complete	2986	total	2040	losers	1699	thinks	1568	idiots	1497	jerk	1333	winner	1300	asshole	1149	moron	870	bunch	634	retard	631	dumbass	610	winners	593	bigger	391	pathetic	356	absolute	328	crush	325
642	weekend	21147	great	17536	hope	6232	fantastic	3187	wonderful	2203	enjoyed	1573	holiday	878	fabulous	871	enjoy	808	fab	415	tgif	404	hopes	383	safe	300	awsome	202	peeps	152	relaxed	130	cheers	81	buds	19
1781	days	39323	couple	10094	past	6232	rainy	1144	nights	494	rough	255	reminded	202
108	feels	9175	hunter	3989	ahhh	1644	gran	1371	demon	392	thompson	349	knocked	288	mat	172	refreshing	161	unreal	33
109	xa	185683
102	de	26417	la	16451	el	13983	en	12789	es	7401	los	6852	se	6380	para	5453	por	5425	las	4603	con	4427	una	4335	del	3855	mi	3189	si	2962	al	2621	como	2414	su	2371	pero	2038	ser	1896
103	neck	6823	hurts	5460	pain	4164	head	3195	body	2584	shoulder	2384	sore	2173	hurt	2108	move	1798	muscle	1553	arm	1418	killing	1352	chest	1303	hurting	1281	massage	1166	pains	982	stiff	940	pulled	777	muscles	701	lower	695
100	dragon	8122	age	5407	train	4243	castle	3089	ball	1625	moving	1077	tattoo	826	magic	445	quest	297	puff	218	kai	181	wreck	179	hidden	172	evolution	140	demo	122	startin	107	nest	93	monsters	90	warrior	61	elf	47
101	finger	5895	nail	4817	toe	4131	cut	4007	nails	2507	polish	2343	hand	2112	thumb	2091	broke	2041	hurts	1963	ouch	1355	bleeding	1090	burnt	928	toes	838	foot	835	tip	761	inch	746	burned	698	fingers	688	pinky	682
106	::	23517	sigh	2596	sn	558	alicia	384	hacked	316	:	286	thompson	203	pinky	182	sara	147	sighs	99	brooke	98	=	91	raven	65	do:	50
107	july	12576	happy	12429	fireworks	8562	fourth	4591	safe	1564	display	780	bbq	671	holiday	608	independence	554	celebrate	545	america	502	firework	426	parade	420	celebration	397	blow	396	bonfire	262	celebrating	223	setting	210	lighting	201	cookout	166
104	world	25543	cup	15043	spain	2762	win	2179	england	1942	fifa	1901	germany	1177	won	1091	usa	985	final	922	brazil	731	soccer	647	match	607	cu	567	champions	567	finals	533	holland	523	india	495	france	486	netherlands	457
105	nice	14874	it's	13991	bells	1918	friendly	1914	folks	800	it'll	752	reminder	650	awhile	607	ring	300	ringing	208	carol	161	neighborhood	156	laid	106	bold	62	fires	49
1212	burn	12046	hell	3539	burning	2765	crash	1958	burned	1815	notice	1375	bridges	1330	calories	1174	bridge	1011	vice	883	london	857	cross	810	british	804	minute	757	brave	612	silence	452	useless	441	disgusting	424	holding	423	central	392
1213	ain't	20220	gonna	6725	andy	3317	nothin	2850	gon	831	heather	360	y'all	327	i'ma	271	somebody's	268	comin	258	leavin	238	homie	171	thang	127	nobody's	84	givin	81	rhyme	76	:	76	trippin	65	shortly	62	shawty	54
99	friend	10792	TRUE	6654	doesn't	2409	perfect	2247	care	2239	funny	2064	believes	1554	makes	1518	car	1440	lucky	1244	making	1199	understands	1097	loved	940	bank	937	question	922	noises	861	aren't	827	friendship	765	speaking	666	repost	649
98	save	17114	big	3124	saved	2260	cold	2037	small	1862	perfect	1854	les	1629	hero	1305	fake	1071	mis	1045	breast	966	cancer	770	grandma's	657	awareness	642	rescue	600	repost	594	drowning	452	saves	406	grandmas	400	boredom	379
91	anger	7782	leads	1995	fear	1769	hatred	1702	rage	1661	frustration	1485	control	1396	angry	1201	sadness	1013	emotions	1003	filled	946	management	939	jealousy	816	emotion	756	depression	699	issues	695	guilt	668	vent	637	letting	624	feelings	574
90	live	22964	die	11711	life	6603	forever	6344	you'll	3046	dream	2310	lived	1634	notice	1030	born	1007	learn	823	fullest	706	fight	700	dreams	666	potential	515	smiling	428	create	427	small	426	faces	408	beauty	403	smell	362
93	mountain	5292	mt	4434	dew	3247	skiing	2511	snowboarding	2410	ski	2138	mount	1526	peak	997	biking	830	hiking	544	colorado	488	boarding	488	mountains	453	jacked	403	hike	388	powder	347	pleasant	341	hill	307	resort	291	sneak	281
92	lol	16381	im	16304	lo	4651	omg	3669	wow	2429	yea	1600	dork	1121	hyper	749	lmao	745	couldnt	285	addicted	256	nerd	199	hype	188	offically	174	kidding	173	ti	122	exited	79
95	facebook	7978	views	4016	profile	3287	:/	2729	check	2360	goo	2011	fb	1825	stalking	1556	top	1528	stalker	1155	total	695	visited	695	apps	608	stalk	583	tool	513	shows	429	app	412	viewing	402	woah	366	view	355
94	colorado	2768	heading	1728	headed	1642	leaving	1519	denver	1518	kansas	1421	city	1341	springs	1194	oklahoma	1180	trip	1143	moving	859	iowa	845	kc	778	utah	583	bound	469	lincoln	464	visit	416	texas	405	california	231	lawrence	227
97	thing	24571	good	20308	bad	10978	isn't	1151
96	sigh	22568	relief	3188	le	2450	tempted	715	compared	666	comic	621	huge	585	sighs	446	ahhh	372	depressing	366	suppose	351	atleast	207	=	202	alas	190	phew	157	t_t	143	nevermind	127	dramatic	115	#N/A	106	jeez	64
1623	buy	16301	bought	4518	stuff	3312	buying	2419	expensive	2316	sell	2299	cheap	2202	money	2106	books	1995	store	1443	hobby	1205	walmart	1071	ffs	621	bucks	550	sold	537	selling	528	clothes	508	online	497	supplies	440	ebay	415
1990	site	4939	online	3640	page	2863	website	2589	called	2246	fb	2134	web	2113	remove	2008	posted	1681	information	1410	score	1300	check	1268	personal	1266	book	1262	info	1211	age	1122	credit	989	searching	976	pics	964	bottom	948
1993	stop	15112	wont	6228	make	5883	drop	1923	blow	1030	til	959	turn	815	pop	699	fight	589	imma	490	dj	489	clock	463	hating	454	sunlight	454	speakers	415	shock	241	somebody's	216	raining	209	block	208	stopping	164
1620	pink	7461	hm	1964	ahhhh	1729	floyd	1447	ftw	1214	hahah	1103	misses	1101	yep	272	rocks	261	dammit	181	bits	173	gawd	43	australian	32
1627	:	20976	haha	11387	hah	5325	funn	838	nu	366	signing	243	hmm	230	yessss	190	gooood	137	goooood	107	fyi	31	woooooo	17	ct	14
1994	pain	32801	hurt	1672	pleasure	1311	meds	1283	killers	1251	ease	1174	gain	910	caused	886	hurts	813	pains	807	worse	754	chest	643	pills	642	numb	634	hurting	520	painful	512	suffer	506	vain	480	surgery	446	causing	423
1625	it's	26392	i'm	14965	alright	8398	it'll	2164	what's	668
1996	good	33036	luck	6854	morning	4640	ole	4352	folks	411	vibes	402	grief	237	deed	184	fashioned	73
1999	super	14755	mario	5505	playing	3454	bros	2626	wii	2126	mega	1435	smash	1258	junior	940	brothers	845	nintendo	516	glue	421	playin	385	galaxy	370	wi	349	hyper	303	uber	302	venture	294	effective	289	cart	283	sonic	252
1998	brothers	13392	sisters	9716	brother	4177	big	2485	sister	2037	jonas	1737	step	1332	keeper	685	blues	494	bros	368	brother's	317	sister's	300	fellow	251	younger	230	venture	181	week's	71	moore	69	siblings	65	chemical	61	youngest	41
1629	hair	32101	cut	3970	nails	1766	makeup	1364	curly	1318	salon	1129	straight	1050	style	856	make-up	806	wash	776	eyebrows	678	brush	677	cu	657	facial	655	shampoo	653	haircut	575	dry	574	mess	548	natural	535	curl	513
1628	it's	29498	raining	12959	cold	2184	sunny	1974	snowing	1382	pouring	1203	hallelujah	768	snoring	567	stopped	467	stops	383	march	306	umbrella	284	windy	267	victory	257	sideways	165	rained	92	gloomy	38
559	west	13796	east	7649	coast	5994	side	3153	kanye	2306	virginia	2118	north	1111	gold	873	south	713	heading	660	key	582	ham	461	movement	423	palm	337	wing	325	central	316	bound	242	california	219	valley	208	upper	197
558	stone	8788	rolling	3017	cold	2354	temple	1599	stepping	1462	stones	1386	kidney	797	sour	607	age	477	disturbed	430	cast	410	stoned	389	nightmare	282	cover	277	written	277	sin	257	adding	236	unknown	193	passing	186	cracking	184
1217	hurts	22399	head	12566	bad	5198	hurt	4410	tummy	4312	ache	3122	stomach	2974	ouch	2933	hurting	1288	brain	1275	body	1114	knee	500	belly	485	throat	465	badly	389	tooth	384	aches	371	sunburn	330	chest	316	ow	311
555	kind	10858	person	3187	word	2163	loving	2077	act	1869	caring	1824	honest	1652	touch	1581	turn	1534	smile	1443	compliment	1141	listening	992	power	975	giving	939	potential	809	advice	778	underestimate	749	kindness	705	sharing	687	helpful	595
554	amazing	6522	fantastic	4903	absolutely	4574	fabulous	3516	brilliant	1557	gorgeous	1548	towers	1154	excellent	555	spectacular	502	simply	454	amazingly	452	absolutly	410	incredible	306	wonderfully	277	amazin	260	stunning	235	fab	209	superb	194	shattered	93	utterly	78
557	it's	14265	official	3789	obvious	3782	isn't	3597	expecting	3053	crazy	2649	wanted	1889	wasn't	1881	yup	1320	guessed	760	sense	629	yep	396	reasons	392	humor	381	captain	169	sarcasm	85	thrilled	59
556	feelin	3999	goin	3119	gettin	2903	workin	2637	bein	2300	makin	1999	missin	1996	havin	1804	doin	1778	lovin	1737	mornin	1640	takin	1547	nothin	1375	lil	1326	tryin	1273	jus	1264	somethin	1108	thinkin	1058	sleepin	1018	wit	990
551	win	19774	lose	13018	game	3704	losing	1886	winning	1785	bet	1699	loose	999	loses	991	streak	768	wi	751	wins	587	chance	553	winner	515	loser	415	deserved	338	argument	332	lakers	311	everytime	308	lions	255	blues	246
550	store	15579	walmart	5043	grocery	3438	shopping	3345	buy	2340	target	1727	stores	1683	bought	1572	wal-mart	1536	shop	1218	liquor	1042	lady	854	section	815	buying	714	line	708	cart	706	groceries	653	dollar	574	items	540	mall	499
553	worse	14695	things	13951	make	7682	bad	7533	happen	832	situation	620	suppose	457	matters	328	situations	190	curse	140
552	sunday	22887	saturday	6554	morning	5236	afternoon	5181	lazy	4234	monday	3972	evening	1318	mornings	1043	spend	805	enjoying	796	rainy	661	brunch	436	nights	429	sundays	398	mornin	358	bloody	338	sunny	281	noon	271	superbowl	252	naps	203
1199	walks	6092	asks	3934	guy	3649	tells	1943	bar	1899	runs	1658	replies	1428	turns	1391	starts	1271	sees	1144	puts	1105	takes	966	sits	922	pulls	893	leaves	708	lady	651	talks	645	jumps	620	picks	573	falls	557
1198	green	7119	red	6739	purple	6733	blue	6662	yellow	6548	pink	5874	black	5501	orange	4891	white	4740	cute	2819	color	2327	funny	2054	gold	1784	brown	1637	silver	1360	colors	1088	grey	929	rate	834	kiss	800	valentine	753
1191	order	10366	free	3708	online	1638	orders	1490	website	1382	products	975	pre	944	interested	944	business	865	ordered	823	product	747	selling	541	offer	464	ordering	427	jewelry	426	purchase	421	amazon	369	items	346	shop	338	sales	314
1190	hes	12588	im	10323	doesnt	2820	brother	950	didnt	923	isnt	703	cus	635	tho	611	hasnt	436	bf	399	wasnt	379	atleast	345	dads	315	cos	286	whos	268	couldnt	267	bc	237	babys	193	asshole	133	sleepin	110
1193	gym	23278	workout	3386	hit	2734	hitting	1250	tanning	1002	shower	810	membership	741	heading	732	fitness	716	headed	648	buddy	616	joined	490	laundry	488	shape	457	hittin	412	workin	396	exercise	390	session	389	tan	356	motivated	351
1192	stick	12858	sticks	2233	beat	1698	glue	1286	disco	1052	suck	824	ride	821	glow	732	shift	379	fork	357	figures	291	sticking	268	hockey	268	picked	228	bust	227	sticky	226	carry	204	chop	168	drum	157	pocket	154
1195	faces	6045	opening	5189	places	4208	familiar	1793	closing	1607	ceremony	972	grand	823	takes	710	peoples	701	worn	587	names	574	smiles	571	friendly	451	priceless	449	smiling	430	crowd	352	recognize	340	grasp	331	fill	318	races	316
1194	de	9312	si	6861	sa	5275	nu	5215	la	4962	cu	3972	ca	3866	pe	3730	mai	3700	ce	2632	se	2162	din	1615	fi	1550	va	1179	dar	1116	te	961	este	938	ani	860	ne	752	cum	740
1197	great	12695	night	10297	awesome	7475	friends	5275	hung	2564	amazing	2382	guys	1649	blast	1253	met	859	hanging	811	hang	608	chilled	274	besties	250	buddies	207	helped	171	ihop	147	wonderfully	20
1196	dr	13379	matter	13029	mind	11885	pepper	2920	phil	850	seuss	737	spray	230	issue	202	scrubs	63	fashioned	44
1759	back	21082	finally	10619	glad	3286	missed	3081	phew	1445	soooo	609	d	490	figured	181	survey	110	sweetie	45
1758	i'm	19523	solo	5240	feeling	3090	stop	2966	loving	2262	ridin	1568	riding	1498	cloud	1402	star	1281	sky	903	shine	890	lovin	880	feelin	841	cover	684	putting	607	heads	507	han	441	flying	382	shades	292	puttin	269
1757	irish	4026	pub	3012	ireland	2817	england	2524	printer	1754	scotland	1680	rugby	1089	print	1054	match	893	lads	867	ink	757	c'mon	647	london	470	northern	429	accent	417	unreal	380	crawl	357	cmon	333	brilliant	324	pint	316
1756	days	23892	left	14252	till	6059	school	5906	weeks	4309	summer	1983	counting	774	exams	680	holidays	481	month	425	freedom	399	finals	384
1755	die	30775	live	4670	born	1790	cry	1510	kill	1135	young	1040	i'd	962	ways	633	fluffy	629	lie	527	alive	495	original	426	dies	393	survive	377	boredom	275	funeral	259	choke	242	bleed	231	habits	212	untill	192
1754	we're	31770	we've	6530	we'll	3006	let's	2137	meant	551	we'd	547	doomed	423	pretend	411	halfway	339	other's	337	eachother	322	backs	297	livin	287	remind	214	cos	208	heads	152	alike	150	begun	106	knives	92	funk	71
1753	show	5699	musical	3909	theatre	3538	performance	2187	rehearsal	1807	cast	1785	theater	1554	stage	1302	production	1143	audition	1108	shows	1075	performing	1063	broadway	1043	auditions	968	tickets	926	opening	908	center	589	arts	583	perform	581	crew	440
1752	don't	31967	understand	16427	people	9275	doesn't	2529	they'd	899	broken	564	expect	557	everything's	393	honestly	315	types	171	impress	164	they'll	143	they've	135	bother	130	everythings	127	kinds	72	generally	57	criticize	45	ment	38	necessarily	23
1751	person	19769	status	10135	i'll	5263	put	4384	write	4287	wall	4255	week	4190	st	3137	question	2501	dare	2498	brave	2282	answer	2264	you're	1837	profile	1688	pic	1257	post	1062	picture	1054	choose	850	inbox	812	married	812
1750	he's	37779	guy	3962	he'll	3673	thinks	2576	doesn't	2084	brother	1735	boyfriend	704	he'd	650	poor	538	tells	298	hero	296	hasn't	287	sees	186	adorable	186	jerk	163	dad's	163	sweetheart	153	handsome	133	talks	127	convinced	119
1177	bday	20490	happy	18146	wishes	9593	birthday	7682	b'day	1612	celebrate	1172	wished	1060	thx	891	celebrating	800	thnx	593	celebration	570	present	566	belated	389	advance	315	birthdays	313	cheers	247	bash	246	celebrated	220	ty	186	wishin	169
1176	ed	7509	drivers	2280	julie	1971	driver's	542	julia	496	screw	281	sp	270	pi	229	outdoor	178	permit	138	tech	136	sophie	109	yikes	108	yaaay	102	thingy	94	nicholas	93	yess	69	reed	68	eddie	62	duke	52
1175	oz	6871	lbs	5158	baby	5138	born	3658	inches	2864	wizard	2690	pounds	1488	birth	838	healthy	818	cm	646	nephew	632	height	544	weight	537	niece	445	tall	400	arrived	379	pound	372	weigh	344	congratulations	336	inch	295
1174	eggs	7954	bacon	6518	egg	5741	breakfast	5551	sausage	1924	pancakes	1636	toast	1391	ham	1324	cheese	1137	sandwich	864	biscuits	746	cook	739	cooking	665	yummy	649	fried	591	mmmm	561	yum	557	gravy	521	rolls	516	turkey	487
1173	version	7529	original	3574	skins	1713	actual	1146	realized	818	prefer	682	replaced	656	basically	639	glee	579	compared	547	improved	542	updated	430	exact	407	japanese	365	international	352	wonders	322	ruined	292	series	264	uk	248	latest	233
1172	brain	21007	minds	4336	criminal	2770	cells	1877	damage	1121	overload	1047	function	871	information	699	explode	677	fried	672	pinky	643	brains	525	smooth	509	freeze	439	melting	376	alike	291	switch	278	fart	265	pondering	258	properly	233
1171	show	14134	tonight	5787	horror	3882	rocky	3811	picture	2436	glee	2426	mia	1993	mamma	1146	nights	1021	halloween	703	shock	367	sho	344	fav	219	showing	189	theatre	166	soundtrack	81	impress	63	broadway	43
1170	jeff	5027	crappy	4723	bridges	260	fisher	56
1179	sale	8691	stuff	4837	garage	3582	yard	3309	clothes	3277	buy	2409	sales	1612	rid	1192	items	1136	lots	1114	shopping	1103	clothing	917	closet	842	store	840	sell	819	huge	698	toys	672	shoes	657	shop	645	bought	618
1178	xa	135401	wave	1483	er	997	:\	879	sem	505	vi	322	fr	268	ver	141	pr	139	tt	136	upp	121	inn	80	vu	57
511	drama	14769	bullshit	2737	deal	2533	bs	2303	stupid	1719	dealing	1146	peoples	841	rumors	645	grow	636	petty	511	korean	475	autumn	461	dramatic	433	realizing	429	fed	409	highschool	407	problems	401	involved	396	unnecessary	383	fix	362
510	nice	31543	day	10545	walk	1643	sunny	813	naughty	562	it'd	559	nicer	445	lunch	445	refreshing	246	jog	227	advantage	168	lasted	135	twas	53
513	pu	2310	ds	1314	fo	872	sn	818	op	415	du	340	os	333	dd	268	fi	199	bu	182	ss	175	uno	162
644	time	14383	good	11585	remember	4396	thinks	2111	thing	1974	felt	1950	times	1880	friend	1486	spent	973	cracked	656	mess	607	slightly	605	filled	443	quiet	360	egg	311	toys	265	laughter	224	childhood	199	agree	161	reminded	55
1285	:/	29972	http	24016	www	12351	blog	2611	check	2445	bible	1898	org	1887	net	1760	html	1266	link	1014	website	1007	uk	1001	article	972	index	914	tumblr	808	php	789	site	649	yahoo	624	myspace	402	updated	358
1284	listening	12515	music	7327	muse	1939	soundtrack	1278	listen	1168	tunes	1106	album	1072	techno	1051	cd	1043	songs	1014	jammin	954	mix	906	listenin	776	remix	775	dj	710	rave	553	chilling	425	playlist	412	whilst	340	repeat	330
1287	ya	17664	wanna	4376	holla	3262	gotta	2409	yo	1999	boi	1819	hit	1496	lemme	1407	hey	1401	ill	1067	ya'll	1030	peeps	713	somethin	644	kno	612	gurl	584	cha	455	bo	407	tryna	280	comin	254	thang	227
512	i'll	9763	dislike	8050	status	6140	impression	5530	confession	4756	ill	2945	met	2337	favorite	1962	rate	1903	memory	1656	strongly	704	reminds	660	dare	480	challenge	472	personality	418	confess	338	crush	274	scale	260	favourite	245	feature	237
1281	phone	19411	call	17761	number	6615	calls	5474	answer	3773	called	2283	calling	2089	pick	1229	ring	1171	cell	1138	prank	984	numbers	685	answering	670	rings	656	rang	617	ringing	583	telephone	533	phones	523	emergency	439	mobile	370
1280	stand	22821	can't	6272	fall	4589	i'll	2859	tall	1890	sit	1232	standing	1131	strong	982	respond	749	saving	725	awe	720	stands	662	crowd	625	sends	607	firm	510	experience	505	earned	469	straight	429	owned	356	grace	347
1283	control	11278	destiny	4216	fate	3489	decide	1923	choice	1853	decides	1270	choose	1074	remote	862	meeting	822	power	804	master	781	circumstances	723	actions	657	falling	630	determine	593	situation	530	outcome	525	refuse	521	react	517	emotions	448
1282	coffee	31855	starbucks	5480	cup	4918	drinking	3035	drink	1698	latte	1503	mocha	1384	cups	1371	pot	1122	iced	1005	mug	762	drank	723	caramel	717	caffeine	692	cafe	592	vanilla	592	maker	578	spice	573	pumpkin	552	table	500
1003	sake	4377	shadow	3351	valley	3257	shane	2614	walk	2607	goodness	2420	death	2095	gods	1006	evil	952	fear	908	leaves	837	yea	792	waters	643	god's	637	fucks	584	acts	561	rod	531	roger	504	pure	481	staff	466
879	making	28698	progress	3155	noise	1150	noises	829	brownies	802	process	660	effort	634	they're	579	comeback	527	moves	479	jokes	453	excuses	399	miserable	397	struggle	392	attempt	333	memorable	303	proceed	235	insist	107	rounds	96	thirsty	94
1289	bro	14986	lil	10723	sis	10264	big	9540	brother	4018	sister	1428	bros	861	nephew	745	congrats	581	bday	535	law	502	b-day	340	niece	259	shout	219	code	201	article	193	twin	133	homie	99	neice	79	engaged	60
1288	man	14264	there's	11903	woman	7064	wishing	6231	hurt	3138	cry	3101	scream	3055	smiles	2759	insult	2747	reminding	2661	domestic	2644	ear	2622	stealing	2608	offend	2196	wall	2189	flirting	2174	humiliate	1820	softly	1660	violence	1604	whisper	1473
514	it's	18528	time	17522	long	8315	i've	8126	waiting	1243	unpredictable	335	stays	280	reach	240
1579	today	16121	turned	6966	realized	5446	thought	4353	started	4143	yesterday	3805	looked	2396	didn't	1936	felt	1265	wasn't	1100	woke	980	decided	694	happened	648	wanted	594	horrible	529	couldn't	489	supposed	427	grew	392	earlier	386	needless	283
1578	night	16588	tonight	13193	girls	8193	blast	2760	forward	1902	hanging	1744	needed	1067	bonfire	1005	babysitting	678	sleepover	663	girly	577	partying	446	favorites	169	bestie	147	girlies	69
689	mine	20712	back	10318	isn't	1930	sadly	1829	reading	963	stopped	924	borrow	560	elses	500	posting	482	else's	472	urs	326	everyones	310	claim	290	victory	288	letting	246	mistaken	231	someones	228	belongs	219	stole	184	mines	145
688	:/	35884	http	30655	watch	24410	youtube	22406	www	21644	ref	9615	feature	7168	yearbook	3109	relate	2905	p	1977	d	775	related	640	user	607	index	335	client	238	8d	136
685	ass	32692	kick	6560	kicking	3450	foot	3357	kicked	3214	kicks	2150	kiss	1840	kickin	1123	dumb	949	asses	939	arse	882	bust	669	lame	515	laughing	463	names	432	handed	431	shove	390	bite	378	busted	308	kissing	264
684	blood	5789	pressure	3145	eyes	2056	veins	1664	flesh	1520	bleed	1389	brain	1238	skin	1160	inside	1151	body	1114	dry	832	bones	794	runs	688	rise	635	bone	539	lips	466	drain	462	shoot	430	misunderstood	374	flowing	350
687	rest	8421	wicked	6142	ain't	2846	close	2119	witch	1901	slow	812	grow	775	aint	766	feed	647	trees	435	mouths	409	nothin	371	goo	315	bills	297	untill	147	permanent	107	teenage	100	troubles	91	elephant	75	figures	70
686	az	3335	meg	1581	rt	890	van	650	ny	593	bb	548	ki	512	es	449	jo	435	mint	411	tt	315	ra	277	ut	253	ban	235	sem	215	mar	214	este	93	fog	93	aj	77	vid	49
681	<3	84781	xo	98	ily	93	diana	51
680	back	16759	home	14237	coming	7675	comin	4563	town	1993	leavin	69	ct	61	lala	34
683	face	29689	book	11541	eli	2013	priceless	998	poker	971	punched	816	slapped	787	mask	560	expression	517	thrown	432	someones	273	kicked	266	slap	256	someone's	253	faces	238	spit	235	stuffing	205	facts	185	rub	167	signing	160
682	make	18635	decisions	13651	decision	7856	choices	4427	making	4266	decide	1863	choice	1850	tough	1221	regret	1192	difficult	796	hardest	465	consequences	381	chances	335	relationships	334	deciding	261	promises	257	based	256	affect	249	choosing	219	options	213
623	people	25336	lives	4722	peoples	3960	thier	2852	people's	2018	heads	935	opinions	889	wonders	806	ruin	717	honest	608	pathetic	474	minds	434	involved	356	else's	345	selfish	337	statuses	328	syndrome	309	amazed	297	houses	291	jealous	276
819	clock	4188	tick	4142	hurry	2505	o'clock	1838	jerk	1442	strikes	487	midnight	363	bomb	307	timing	250	faster	248	strike	243	c'mon	234	unreal	160	struck	155	twelve	138	clocks	110	essence	108	slower	106	valuable	85	sheesh	81
1226	fb	23847	fam	11216	blessed	2458	yall	1442	goodmorning	1172	goodnite	1129	goodnight	1100	nite	1004	peeps	921	safe	756	bam	673	fa	656	luv	542	holla	495	mornin	495	ya'll	479	y'all	367	sn	341	tgif	249	familia	243
621	red	24616	bull	6255	lobster	1853	riding	1630	hood	1355	wings	1244	pit	1033	bulls	911	robin	802	sox	719	carpet	674	wine	446	ring	354	cross	311	horns	255	detroit	253	rocks	246	lipstick	228	wing	212	ruby	205
873	wanna	12532	bad	7960	swear	2059	freakin	1974	buy	1582	close	1476	cover	1407	prepare	1386	freaking	1049	everytime	866	frickin	712	soo	705	city	598	magazine	588	sooo	578	smiling	487	oprah	483	lights	460	soooo	368	queen	324
1224	note	19972	side	5778	death	1967	repeat	1919	read	1767	lighter	1008	brighter	916	positive	874	wrote	709	happier	641	sarcasm	621	ended	612	mental	421	posted	283	related	274	cards	272	sticky	208	latest	180	continued	91	similar	86
1223	single	20567	relationship	6231	person	3318	means	2085	word	1812	complicated	1559	clever	1129	ended	615	ego	534	dating	487	relationships	404	kidding	352	simply	313	lonely	307	depending	294	committed	235	digits	172	couples	171	bein	166	cheated	135
1222	ang	30993	sa	26780	ng	22472	na	18407	mga	9631	mo	8288	ay	7125	hindi	5965	ko	5487	ka	5345	lang	4920	kung	4652	lahat	3840	para	3551	pa	3447	isang	3060	tao	2870	walang	2829	buhay	2777	ako	2684
1221	fell	8200	stairs	6889	floor	3166	walking	1813	slipped	1372	tripped	1111	flat	1001	landed	999	falling	963	ran	806	chair	738	ground	716	push	641	pushed	629	elevator	589	steps	550	walked	545	knocked	535	threw	508	tripping	477
624	na	3423	ki	2291	ta	1862	er	1462	ar	1427	aj	1036	din	936	mon	662	hoy	592	sob	513	jay	509	je	508	por	469	te	458	ai	445	chai	422	jai	419	ke	358	ja	320	ek	291
407	pen	5236	knock	4929	paper	2451	pencil	2434	notes	1680	write	1592	who's	1404	ink	1279	writing	1110	pens	1101	case	849	written	810	notebook	781	pencils	761	permanent	687	wood	668	erase	639	pad	409	sword	387	colored	332
406	loved	22829	hated	4166	kurt	1969	nicholas	1222	sparks	1081	cared	876	trusted	476	appreciated	360	compliment	260	showed	249	understood	225	greater	219	feared	210	spark	199	notebook	190	deeply	186	tis	162	truely	155	lovable	127	plenty	125
405	yeah	27613	hell	16177	heck	2843	yea	2445	aw	675	aww	523	ye	325	bitches	315	ummm	253	yeahh	120	hells	28	yeahhh	21	>:	18
404	god	14882	grace	9486	mercy	4120	lord	2859	god's	2562	blessed	1938	dear	1720	perfect	1369	everyday	1123	humble	1096	short	802	unknown	728	protect	693	roof	646	saved	624	gods	594	table	590	sins	572	confess	535	presence	498
1375	drunk	18254	sober	3821	hungover	2109	drunken	1843	hangover	1436	drink	1077	drinking	1041	bar	686	fucked	612	slightly	603	wasted	533	alcohol	492	tipsy	316	stoned	315	hung	313	drank	283	whilst	267	piss	223	partying	213	parties	185
1374	find	6653	friends	6108	place	5594	play	5074	interesting	3917	end	3800	put	3572	birth	3492	fb	3120	game	3036	copy	2552	meet	2510	profile	2491	paste	2279	middle	2065	sentence	1922	met	1899	places	1708	remember	1634	amusing	1517
1377	tech	5018	ga	4094	georgia	3449	atlanta	1859	ne	1256	columbus	704	atl	596	virginia	559	florida	434	texas	373	woohoo	342	crew	293	va	277	folks	273	bound	234	wreck	215	jacked	210	southern	186	aquarium	147	vet	131
400	home	20177	finally	7531	made	6260	safely	3124	glad	2725	arrived	2571	drive	1024	returned	989	reached	302	landed	256	returning	207	phoenix	90	pittsburgh	57	legendary	42	psycho	42	offering	34
1379	home	12692	back	10919	heading	8493	work	7950	tomorrow	5946	bed	3096	headed	1824	shortly	885	picking	568	packing	353	headin	330	morn	205	airport	178	sooooooooooooooooooooooo	3
1378	school	38107	high	21185	college	1833	grad	1153	musical	1078	primary	1056	middle	1014	drama	644	career	475	graduated	449	graduation	370	elementary	276	school's	132	graduating	64	assembly	29
452	<3	21496	:	10415	youu	2018	youuu	1132	lovee	793	boyfriend	784	;	578	hacked	474	bestfriend	404	babe	362	bestest	266	bestie	198	;d	190	christopher	165	aha	159	elizabeth	129	wifey	128	francis	89	babes	85	hacking	79
409	times	10856	tough	9792	hard	9140	matter	3322	remember	1509	rough	1330	handle	1178	easy	1161	act	752	difficult	708	situation	644	stressful	554	situations	511	stick	431	soft	398	easier	392	threw	276	life's	231	helped	212	lifes	201
408	sms	4956	haha	4185	globe	3892	logan	2766	smart	1242	victor	1174	tyler	630	-_-	249	brb	182	:-d	149	bb	146	;-	106	sim	77	urgh	68	unlimited	64	shares	47
1343	goin	24837	tonite	3337	bed	3101	shoppin	1134	gettin	880	workin	754	txt	743	nite	711	headin	624	mall	622	whats	614	prolly	602	hangin	583	mornin	531	wats	494	tomarrow	477	prob	476	comin	367	takin	356	stayin	344
1344	guys	25992	miss	6052	gals	1803	cheers	857	fat	681	buddies	572	gal	389	pals	268	dolls	249	homies	100	buds	72
1345	perfect	8962	makes	5880	world	5477	man	4983	friend	4067	hard	3927	wonderful	3524	laugh	3407	works	3238	thankful	3216	grow	3108	helps	2810	everyday	2700	isn't	2505	balance	2023	crazy	2021	drives	1090	brag	686	partner	180	bestfriend	108
456	awesome	24683	pretty	9543	freakin	3223	cool	3095	super	2092	totally	1222	sweet	842	friggin	841	frickin	643	amazingly	437	stoked	382	btw	351	lame	304	jealous	303	uber	248	hilarious	233	fricken	232	wicked	210	incredibly	188	coolest	166
457	wont	20409	dont	7548	ill	6150	give	3111	leave	2609	till	2155	anymore	1032	promise	926	untill	689	prob	674	prolly	531	atleast	495	bother	332	bet	279	anytime	248	awhile	238	bc	238	youll	236	regret	233	ther	150
379	thing	28353	happened	7891	happen	4007	worst	3564	funny	1526	wrong	1484	moment	1233	what's	986	exact	817	funniest	785	weirdest	480	happend	448	conversation	425	scariest	322	craziest	230	coolest	169	habit	157	continued	157	remind	143	wierd	121
378	house	33010	haunted	3728	houses	1779	waffle	1398	blues	545	scary	429	sleepover	424	hunting	287	locked	267	friend's	188	grandma's	164	trapped	163	trail	161	ale	155	woods	153	scare	141	md	134	boyfriends	130	guest	121	cousin's	120
647	likes	20629	dislikes	2233	thinks	2029	liking	1945	loves	1853	hates	1788	fact	1236	apparently	842	strongly	316	haircut	256	explain	251	secretly	161	enjoys	158	rivers	143	statuses	140	agrees	125	lick	114	unlike	92	disagree	63	specially	51
371	fact	12543	facts	2396	useless	1628	evidence	1403	presence	1304	proof	1157	random	1088	accept	961	absence	911	notice	768	completely	751	reading	737	proven	737	checking	697	existence	648	realize	600	simply	578	prove	522	actual	467	skipped	457
370	hug	12707	kiss	6432	give	3534	chance	3296	relationship	2208	cuddle	1851	laugh	1708	chill	1636	friendship	1631	apology	1158	hugs	944	inbox	935	sex	665	cheating	640	term	631	oliver	442	bestfriend	381	simply	368	8	243	victor	238
373	room	33557	living	9525	sitting	2325	floor	1927	dining	1665	table	1570	emergency	1570	dorm	1081	clean	1029	bedroom	930	cleaning	926	cleaned	919	kitchen	784	locker	684	mate	660	rooms	636	hall	568	walked	558	furniture	510	tidy	439
372	charlie	5834	brian	5164	andrew	4338	sheen	2376	he's	2171	mention	1756	gave	1573	celebrity	1379	news	1258	lives	1146	drug	1003	media	907	addict	837	soldiers	594	honor	582	christopher	430	david	416	mays	398	winning	326	posting	318
375	i'll	11579	someday	8618	find	5639	you'll	5460	we'll	3708	it'll	2260	eventually	1086	meet	1085	realize	898	they'll	838	promise	670	figure	639	doubt	424	u'll	312	dreamer	285	sooner	250	she'll	223	he'll	185	settle	167	someone's	138
374	infection	5985	ear	3648	doctor	3272	sinus	2357	meds	2312	antibiotics	1787	poor	1581	medicine	1540	hospital	1531	er	1444	gave	1388	dr	1319	doc	1288	fever	1170	doctors	1055	pills	958	chest	868	allergy	775	throat	774	medication	731
377	cake	23091	chocolate	4362	cupcakes	3370	making	3094	eat	2809	cakes	2398	cupcake	1947	baking	1939	piece	1816	icing	1366	bake	1356	eating	1162	cheese	1110	yummy	956	velvet	865	carrot	841	ate	742	delicious	625	baked	591	slice	446
376	good	23179	feelin	8768	pretty	8071	lookin	743	hella	232	lifes	208	crappy	201	surprisingly	187	goood	94	hopin	53
393	facebook	19573	page	4765	log	4136	fb	3250	password	2911	computer	2240	hack	1615	layout	1443	logged	1313	hacked	1280	myspace	1279	changed	1089	user	979	forgot	977	account	821	notification	714	hacking	700	commented	647	changing	613	warning	425
392	job	8470	position	3596	company	1949	manager	1692	interview	1599	experience	1397	office	1379	assistant	1368	interested	1103	business	1004	resume	956	career	882	sales	855	hire	854	hiring	843	offered	835	offer	808	jobs	800	apply	734	staff	699
391	hurt	10494	legs	9141	feet	8812	sore	4057	arms	3736	knees	2273	killing	1512	hands	1491	walking	1062	toes	782	shoulders	734	aching	695	hurting	681	ouch	674	bruises	484	bruised	420	swollen	395	numb	380	neck	341	ribs	327
390	sat	12010	wed	4414	fri	3916	sun	3131	thurs	3055	mon	2722	tues	2326	prep	443	scores	394	morn	380	oct	275	wk	270	aug	209	prob	169	nxt	154	nov	152	feb	151	source	107	newly	92	ct	83
397	movie	19241	watched	6140	watch	5785	inception	4093	holmes	2502	movies	2414	sherlock	2290	avatar	1476	theater	1463	film	759	despicable	743	cinema	681	theatre	597	tangled	579	shrek	515	popcorn	438	recommend	390	salt	386	excellent	371	district	281
396	pass	13314	hall	4652	noble	2111	barnes	1937	passes	1623	smash	1621	ou	1356	fame	1206	quickly	1022	passing	717	incredible	478	pas	281	judgement	231	section	227	fellow	178	starbucks	174	collect	167	superior	145	causing	142	vip	138
395	mom	39919	thinks	2795	teen	2794	lot	2475	doesn't	2221	age	2023	decide	1803	she's	1715	08:00:00 AM	1302	exist	1197	fashioned	954	deciding	297	pregnancy	107	embarrassing	38
394	ng	8949	lng	7031	na	6257	ang	5493	sa	5396	aq	4773	ko	4263	ung	4009	mga	3248	nmn	2752	pa	2636	nman	2437	tlga	2334	mu	2252	kc	2112	ako	1950	wla	1840	pla	1816	nga	1774	ka	1658
399	silly	13203	rabbit	2548	bands	806	roger	454	string	441	tricks	421	rubber	345	nails	313	ridiculous	311	acting	210	bricks	204	braces	186	levels	151	shaped	150	square	137	booth	117	sticking	112	inn	111	fond	110	grease	109
398	day	21110	today	12317	productive	8099	ra	2325	tiring	495	extremely	357	successful	280	fairly	257	enjoyable	204	determined	187	surprisingly	168	strike	121	counter	120	semi	89	riot	73	deck	73	wonderfully	70	exhausting	48	halls	29
1246	ho	17670	woo	2511	yo	1675	hum	1640	hey	1587	wo	501	whoo	495	boo	475	jai	423	bah	394	bug	269	pimp	204	hu	189	hoe	139	bu	129	gaya	105	notebook	59	pirates	55	whistle	26
245	means	23404	doesn't	4640	decided	3438	perfect	3388	alot	1498	you've	1302	imperfections	1141	simply	855	letting	738	worries	665	phrase	419	philosophy	282	passing	261	forgetting	213	accepting	185	everything's	183	basically	173	unbelievable	144	justify	109	motto	104
244	ap	9704	test	6023	homework	4255	history	3557	bio	2900	exam	2856	english	2854	hw	2254	studying	1948	study	1875	finished	1630	chem	1619	essay	1549	math	1548	lit	1479	review	1403	physics	1263	psych	1247	notes	1241	project	1185
247	home	28979	stay	10201	nursing	1367	stuck	1329	stayed	1280	staying	1215	decided	688	parents	618	hospital	367	overnight	336	bringing	237	headed	212	stayin	193	debating	151	pjs	73	homes	71	daddy's	53
246	attitude	8122	effort	2484	problems	2271	problem	2065	worth	1870	positive	1844	ability	1296	deal	1135	annoy	1133	mental	842	personality	664	circumstances	614	solve	597	capable	543	difference	448	shows	397	situation	391	depends	355	impress	344	catching	340
241	mass	6217	effect	5547	full	4034	starting	1246	hah	892	wonders	745	hmm	601	destruction	571	usual	529	butterfly	416	ahhh	356	murder	343	weapon	292	basically	260	sort	259	dramatic	256	weapons	220	literally	189	forced	181	operation	167
240	start	3230	directions	3178	end	3073	china	2841	google	2807	point	2552	location	2543	type	2518	maps	2052	direction	2031	route	1896	japan	1795	map	1739	laugh	1402	opposite	1018	step	837	exact	813	gps	711	destination	657	laughing	530
243	alot	18151	fun	10782	wow	1565	didnt	799	helped	653	tho	587	accomplished	254	definately	232	alittle	199	begining	128	explains	128	lastnight	103
242	truck	12504	hit	2747	drive	2527	car	2225	driving	1222	load	1146	pick	1132	trailer	1075	trucks	1018	stuck	890	jeep	875	loading	851	dump	702	redneck	645	semi	566	mud	557	drove	513	ran	499	loaded	436	monster	422
249	nose	11834	cold	3564	allergies	2229	sneezing	1585	coughing	1399	running	1320	bloody	1237	stuffy	1055	breathe	1050	bleed	963	blow	752	headache	705	stuffed	596	bleeding	477	sneeze	432	blocked	416	fever	412	itchy	382	blowing	371	picking	365
248	pain	4826	heal	4402	wounds	3200	scars	2468	scar	2146	hurt	2085	wound	1769	leaves	1728	heals	1425	healing	1300	bleeding	941	healed	928	heartache	791	deep	765	steal	619	remind	561	cuts	451	bleed	428	battle	422	wounded	392
179	expect	11602	unexpected	3312	expected	2713	expectations	2360	disappointed	2135	expecting	1340	happen	1122	disappointment	1069	disappoint	883	surprise	774	return	703	assume	507	avoid	477	disappointing	452	surprises	342	results	312	simply	295	lead	278	surprised	273	leads	232
178	:/	20573	http	15390	www	7740	formspring	7256	chat	4396	video	4121	join	3058	link	1470	li	1420	click	1105	questions	790	joined	711	myspace	643	vid	549	vote	538	anonymous	422	abc	401	chatting	355	web	305	ama	289
177	i'm	26267	that's	12369	yeah	3696	talking	3454	suppose	3295	telling	833	assuming	87	offended	58	shadows	37	mend	32	restore	18
176	it's	11588	thing	7228	sort	4639	isn't	2921	odd	2494	suppose	1814	strange	1707	thinks	1522	apparently	1204	unusual	1123	weird	841	telling	832	happening	820	fact	706	fairly	416	cruel	400	remind	330	basically	302	curious	297	frustrating	273
175	show	28105	talent	7772	america's	794	genius	739	variety	548	shows	546	cleveland	503	showing	490	horse	430	showed	377	entertaining	296	audition	275	choir	258	audience	250	abilities	241	perform	238	talented	231	rocked	226	crowd	212	slide	208
174	warm	12528	cold	10632	blanket	3306	nice	3228	fuzzy	2358	inside	1961	freezing	1747	weather	1738	cozy	1196	blankets	1049	heating	898	cuddle	783	wrapped	763	brings	658	winter	635	snuggle	628	snuggie	621	peeing	613	electric	610	pad	594
173	safe	17375	home	9897	stay	5411	sound	5158	hope	4455	trip	1961	drive	1078	warm	979	keeping	962	pray	855	praying	727	travel	691	travels	688	return	640	traveling	635	journey	459	arrived	407	careful	383	safely	334	hopes	287
172	excited	16180	super	11243	tomorrow	6858	tonight	5954	stoked	3451	pumped	2763	soooo	1094	sooooo	930	psyched	882	prom	316	bummed	236	upcoming	189	wooohooo	141	tommorrow	125	retreat	96	thrilled	74	snowboarding	49
171	dog	10904	puppy	9247	dogs	3273	puppies	3247	vet	2295	cute	1397	poor	1371	named	1189	mix	924	pet	789	lab	765	german	650	female	628	interested	616	kitten	571	adopt	567	rescue	524	adorable	523	animal	518	male	502
170	war	19315	poke	6559	peace	2222	poking	1718	win	1484	civil	1302	wars	1280	fight	1009	poked	918	battle	865	declare	664	fought	592	iii	499	ii	450	began	432	prepare	428	worlds	392	declared	377	mafia	345	zone	328
656	power	29501	rangers	1598	knowledge	1205	peace	905	underestimate	848	higher	703	supply	698	electricity	568	mighty	518	tools	432	destroy	432	powerful	409	absolute	385	ability	349	greater	341	powers	293	responsibility	235	lines	234	trusting	232	tool	228
657	work	15566	ready	13258	home	6505	bed	4979	tomorrow	4117	gotta	3865	tired	2632	ugh	922	nap	662	shower	651	rested	116	collapse	33	horribly	11
654	called	17218	thing	8628	richard	3716	found	1985	apparently	1052	texted	460	invented	303	hasn't	251	cops	118	separate	107	ship	98	hasnt	96	informed	62	confirm	59	iii	55	coincidence	52
655	make	30045	feel	15104	miserable	2527	wondering	544	grateful	418	amount	333	sayin	213	worthless	201	souls	201	charming	153	happier	107	carlos	103	that'll	100	position	91	uncomfortable	54	wonderin	46	spite	38
652	na	35838	sa	4171	din	3099	ang	2169	ko	2127	tapos	1334	lang	1310	naman	992	ako	917	rin	888	hahaha	782	yey	738	sana	686	bukas	628	hay	588	hehehe	541	ulit	497	sem	485	nalang	402	hehe	391
653	yg	2874	aq	1572	bs	1154	tp	1076	lg	1049	ga	996	jd	971	ad	939	dr	761	ne	740	ma	710	org	673	aj	411	ja	318	km	309	sm	308	tu	304	hr	302	ny	279	dah	276
650	application	4762	job	4440	college	3589	applications	2788	filling	2760	fill	2270	form	2223	online	1510	paperwork	1480	filled	1472	forms	1393	finished	1319	process	1106	scholarship	865	apply	829	submitted	752	resume	646	visa	622	app	620	approved	620
651	busy	36614	ahead	1906	keeping	523	bee	471	whew	301	schedule	293	preparing	274	errands	115	insanely	103	phew	95	disturb	78	meetings	70	keepin	68	priorities	44
1364	birthday	34915	wishes	25020	happy	15057	present	1034	wished	267	cheers	227	birthdays	193	celebration	100	belated	77
1977	hot	16115	bath	11666	nice	5578	shower	4264	tub	4218	bubble	2883	water	1739	gave	1201	relaxing	1136	warm	850	soak	846	machine	805	relax	686	bubbles	499	steam	368	showers	316	candles	302	relaxed	262	massage	237	hott	179
1976	ready	12787	today	9385	bring	7283	summer	3172	tomorow	1230	whos	387	sooooooo	238	heck	192	ahhhhhh	99	looong	20	rested	17
1975	na	25262	mo	23207	ka	17888	ko	17655	ang	14651	sa	13013	ako	12525	lang	11275	kung	9325	ng	8704	hindi	8007	di	6903	pa	6619	mahal	5893	kita	5646	ba	5383	naman	4982	pero	4278	wala	3860	alam	3850
1365	handle	11371	hard	5878	worst	5712	deserve	5591	times	5551	control	4944	mistakes	3822	hell	3269	handful	3209	won't	3051	women	2619	strong	2574	independent	2323	dare	2300	repost	2292	bitch	1861	admit	1527	outspoken	1429	selfish	1410	impatient	1306
1974	left	10509	press	6647	enter	4780	magic	3945	key	3584	works	3125	log	2982	page	2953	click	2651	rid	2461	trick	2435	circles	2289	worked	1827	refresh	1721	scroll	476	tricks	375	steps	332	keyboard	270	arrow	230	conference	185
1973	dc	6069	ac	2396	washington	2277	va	1966	philly	1919	heading	1682	nyc	1573	trip	1457	boston	1412	ny	1373	md	1188	nj	1008	pa	1004	headed	909	area	840	visit	831	leaving	783	virginia	628	york	625	ct	593
1972	key	6762	door	6111	lock	5904	locked	3808	open	2552	room	2415	caps	1689	inside	1434	keys	1331	gate	957	doors	928	closet	914	locks	817	throw	597	bathroom	447	opened	436	opens	429	master	422	trapped	405	enter	401
1971	person	8555	killer	4783	crime	2911	partner	2638	left	2575	side	1742	kill	1522	serial	1482	turns	1040	victim	1024	rules	754	killers	728	punishment	425	psycho	315	takers	260	interest	255	stepped	255	cheating	197	lawyer	196	identity	190
1970	status	7774	copy	7670	raise	6906	paste	6733	cure	5555	lives	5291	awareness	4913	affect	4270	won't	4145	stupidity	3046	affected	3023	related	2336	fan	1974	deserves	1954	sympathy	1651	suffers	1599	repost	1297	wont	1290	idiots	1170	idiot	1070
1362	ground	11828	pants	3501	stand	2898	hit	2734	found	1973	fool	1684	fall	1549	feet	1492	lookin	1238	running	1109	sound	1030	throw	989	crashing	799	solid	799	turned	776	edge	650	falls	588	threw	507	flying	487	throws	459
1968	day	20273	today's	7460	gonna	5972	todays	4302	tomorrow's	2745	tomorrows	1759	agenda	1118	yesterday's	854	quote	409	horoscope	144	highlight	84	gooood	78	outing	69
1969	xx	7856	xxx	4870	loads	3398	xxxx	2205	xxxxx	1715	chloe	1560	babe	1431	emma	1093	lots	1030	xxxxxx	947	gorgeous	819	mummy	573	babes	423	mwah	366	sophie	326	louise	323	wi	308	thankyou	304	bits	287	missin	286
1618	text	16450	call	7965	bored	4224	mee	3361	txt	2536	meh	1754	meee	1679	meeee	707	plans	535	babysitting	486	idk	412	chillen	298	wan	181	yayy	146	entertain	137	#N/A	129	fone	105	hmu	83	upp	76	device	69
1619	super	34129	bowl	9778	excited	5807	duper	2230	hero	926	steelers	685	packers	667	powers	607	stoked	457	saints	317	puppy	303	bow	299	commercials	279	pro	244	champs	180	colts	168	pittsburgh	101	psyched	89	bummed	80
1616	day	16361	today	13453	good	9073	hay	3454	nice	2708	hitting	592	hittin	232	ruined	96	stack	53	straw	18
1617	study	35547	bible	2638	test	2199	exam	2147	exams	1963	studying	1788	guide	1604	finals	1561	case	1469	hall	1307	library	763	tests	721	session	638	motivation	460	midterm	443	midterms	395	attempting	261	mode	258	studies	231	psychology	215
1614	number	19586	send	5386	message	5297	i'll	5030	inbox	3969	post	3306	facebook	2877	ill	2575	write	1875	active	1457	numbers	1158	wall	908	order	717	shows	708	report	603	slow	601	complaints	600	removed	581	members	559	knowing	543
1615	night	13444	stars	9849	sky	7746	shooting	6735	pretend	6534	airplanes	3008	star	2247	heck	651	lay	593	ceiling	453	faded	315	diving	275	airplane	234	staring	198	overrated	190	scar	141	pretending	138	permanent	108	sail	97	planes	88
1960	ku	4916	aku	3572	tak	2747	kau	2687	di	2520	dan	1673	yang	1311	ini	915	ada	793	mu	721	kan	552	lagi	521	dia	418	sayang	408	mata	385	yg	372	hari	262	apa	260	pun	245	mana	185
1961	body	5224	baby	4151	perfect	3681	proud	3458	mom	3135	greater	2185	child	2024	chest	1871	carried	1829	mirror	1773	isn't	1518	blessing	1499	magazine	1461	wouldn't	1424	kissed	1268	honor	1263	puked	1193	babies	1153	peed	1104	boo	977
1610	school	6891	tomarrow	6124	yay	3692	fred	1553	ginger	74	rogers	63	offers	62
1611	real	11759	quick	10514	easy	1833	question	1488	shady	1263	slim	1088	fast	1002	hurry	633	here's	468	poll	317	honest	283	healthy	216	recovery	188	survey	186	snap	171	perfectly	170	passing	159	basket	140	quicker	131	response	114
1363	catch	14456	cold	3336	inside	2360	caught	2175	running	1710	leaving	1543	jar	1467	catching	1103	soul	1080	hearts	948	ice	940	round	888	eye	857	tearing	743	collecting	736	scars	587	phrase	398	guard	376	runnin	375	dirt	357
1768	feel	34289	make	10332	guilty	3600	accomplished	1880	pleasure	1307	depressed	434	conscience	364	guilt	225	betrayed	205	ashamed	201	pleasures	164	permission	123	superior	122	insecure	117	confident	82	roosevelt	80	rhythm	62	oddly	46
1769	live	25689	lives	4816	dies	1707	pooh	1604	living	1534	happily	1514	longer	1200	harmony	825	minus	822	lived	728	hundred	715	poo	688	stream	246	lifestyle	213	saves	147	expectations	143	sacrifices	78	whispered	48
1762	game	5347	playing	5312	play	4522	creed	2290	sims	2057	ii	1458	games	1363	online	1234	played	1153	beta	1149	iii	824	pc	791	ps	782	steam	565	server	525	edition	488	gaming	403	sc	390	demo	349	blizzard	337
1763	system	9852	immune	1582	sound	1430	support	1066	works	962	systems	718	wonders	602	problems	597	sort	591	share	560	struggling	551	screw	538	kindly	401	nervous	383	moral	381	basically	365	unit	336	useless	328	process	324	shock	289
1760	brand	4504	greg	3338	travis	2723	russell	2527	howard	2474	miller	659	jacob	558	survivor	426	mason	294	ryan	237	alyssa	173	randy	132	joshua	109	marcus	97	dragging	89	alan	76	arthur	67	bruise	53	dread	36
1761	good	26433	luck	16307	bad	9644	charm	442	stroke	104	plenty	97	streak	87	harsh	70	treatment	55	clown	35	curtains	21
1766	remember	32416	reason	2726	forgot	2540	forget	1911	november	1630	happened	1491	plot	1147	remembered	515	recall	496	remeber	410	we'd	404	remembers	371	nights	353	unique	297	names	291	moments	284	grade	254	remind	253	powder	241	forgotten	238
1767	wah	3419	yeh	1913	ah	1605	hai	777	wa	693	ke	674	le	670	mai	528	wel	487	ye	437	eh	424	mere	255	chain	252	rang	228	bo	224	jo	217	aa	169	gona	165	pee	164	hm	148
1764	fun	42550	times	4276	fu	2393	havin	2315	lot	1099	lasted	765	filled	540	twas	233	tons	198	babysitting	187	lastnight	172	worlds	55
1765	diet	6481	coke	4747	healthy	2466	eat	2272	pepsi	1962	eating	1786	drinking	1619	drink	1519	cola	1400	exercise	1349	fat	1246	soda	1175	calories	749	sugar	730	foods	616	lifestyle	559	cherry	535	bottle	513	liquid	466	caffeine	436
1142	car	9650	keys	7000	left	2627	lost	2416	locked	2354	found	2296	stole	2267	purse	2073	wallet	1942	alicia	1827	stolen	1827	forgot	734	pocket	654	key	648	bag	434	fm	416	offered	382	jacket	355	spare	343	tipsy	295
1143	shit	38454	holy	5461	fuck	5251	fucking	3515	piece	2807	bull	1802	load	1124	fuckin	650	ton	454	outta	404	pile	277	worthless	155	goddamn	95	scares	91	stink	59	ave	50	dip	45	candles	36	moonlight	26	stupidest	24
1140	smoking	7579	quit	7496	smoke	4903	cigarette	3395	cigarettes	2220	pack	1501	quitting	1234	drinking	1141	smokin	837	pipe	772	smoked	674	packs	452	pot	421	habit	337	crack	330	weed	325	fag	251	lungs	237	lighter	236	chain	214
1141	mars	4809	crazy	3211	seconds	3200	bruno	2980	lazy	2460	common	1780	truth	1527	knees	1216	prayin	959	sense	863	mar	819	dedicated	611	praying	488	grenade	286	courtesy	92	led	85	collection	85
1146	ty	3740	bobby	2955	ricky	1902	andrea	1757	karen	1548	hanging	660	roomie	151	steph	82	jen	72	walker	67	jared	42
1147	music	35375	listening	9689	listen	5684	country	2206	loud	1600	playing	1540	background	1389	listenin	1014	classical	897	blasting	794	suggestions	679	songs	660	rap	576	dancing	573	taste	509	downloading	451	jazz	396	industry	341	plays	311	ears	304
1144	bout	23977	thinkin	11129	talkin	6215	goin	1584	talking	1159	wat	1145	sittin	959	gettin	892	somethin	684	worried	673	missin	348	wonderin	272	layin	248	makin	217	abt	158	sumthin	129	drinkin	113	walkin	113	listenin	108	seein	94
1145	god	15671	jesus	10493	christ	8476	lord	5350	spirit	5116	sin	3250	holy	2541	bible	2271	romans	2218	father	2164	faith	2117	god's	1982	grace	1976	sins	1865	matthew	1488	glory	1384	08:00:00 AM	1366	ye	1281	saved	1172	heaven	1130
1148	worst	19385	thing	3441	enemy	2904	possibly	2469	eve	1834	worse	1157	officially	869	case	859	entire	830	nightmare	823	absolute	695	hangover	661	expect	629	prepare	626	prepared	539	longest	397	experienced	281	combination	195	nightmares	168	timing	138
1149	fucking	29726	fuck	4521	shit	3991	hate	3925	stupid	3260	retarded	1528	bitch	849	pissed	806	omfg	805	kidding	514	shitty	465	bitches	457	annoying	405	bullshit	405	idiot	346	ridiculous	332	retard	330	useless	282	idiots	219	pathetic	209
769	king	17238	lion	5711	burger	1783	queen	1512	kin	1414	crown	1187	stephen	980	jungle	961	kings	756	lamb	608	hail	532	size	487	cares	449	sofa	444	royal	426	mighty	388	disagree	353	lions	341	sleeps	340	arthur	296
692	ipod	14203	music	6902	touch	6686	songs	5755	itunes	3777	download	2125	shuffle	1807	downloading	1609	suggestions	1393	listening	1274	gb	943	listen	859	playlist	810	library	781	downloaded	612	player	568	cds	393	deleted	391	headphones	346	cd	340
693	mary	10925	jane	4338	kay	3570	bloody	1849	charlotte	1656	virgin	1469	mama	649	lamb	632	hail	495	kate	418	joseph	365	emma	271	ann	269	beth	264	ellen	246	anne	230	dies	205	diary	201	elizabeth	159	feast	143
1544	means	5356	doesn't	2240	longer	2167	bedtime	1895	stories	1673	point	1613	boring	1494	sleeping	1476	free	1470	parent	1229	proud	1066	realizing	1046	deserve	995	bar	923	realize	858	drinking	854	hopping	815	board	652	staying	641	responsible	528
1545	status	14821	cancer	13378	hour	11543	post	10265	fighting	9738	died	7170	put	6837	wishes	6491	honor	5773	patient	5611	found	4637	person	4136	cure	3908	won't	3495	mention	2712	prayer	2577	fought	2307	personal	1895	survived	1884	reason	1592
696	code	4037	cam	3917	war	3658	eagle	3626	damn	3384	free	1658	auburn	911	extremely	779	web	628	bonus	548	bald	528	pack	501	source	420	area	409	iphone	395	sec	299	giant	291	link	289	eagles	160	desert	159
697	made	21361	smile	10986	people	5996	life	5588	set	4345	status	2843	i've	2097	you've	1643	click	1546	laugh	591	regret	590	surprise	575	surprised	552	smiled	403	you'll	383	entire	333	meeting	189	button	151	impact	149	press	136
694	sunshine	13771	rain	4048	loving	1818	walking	1373	enjoying	1080	useless	765	eternal	654	glorious	625	ray	617	walkin	525	rainbows	432	skies	416	bag	404	gray	392	brings	368	shadows	360	standing	330	grey	313	cloudy	302	anytime	291
695	ii	8919	meh	858	mah	728	thee	429	tu	426	hatred	348	smh	292	sn	291	mee	272	hmu	252	dayy	218	skool	214	iii	159	tryna	157	wayy	124	todayy	112	boyz	102	upp	93	doe	88	lovee	77
698	hanging	9015	hang	8476	fun	8256	friends	7002	tonight	3837	bestie	1667	bff	1337	blast	1241	hung	1070	hangin	997	besties	904	fam	538	pool	515	mall	505	hangout	447	buddies	426	buds	388	bf	380	peeps	365	gang	318
699	state	18910	ohio	3647	michigan	2907	university	2311	florida	1600	iowa	1452	union	1317	california	1008	college	935	wisconsin	924	fair	837	texas	808	washington	796	indiana	689	northern	686	arizona	667	utah	654	southern	639	accepted	561	oklahoma	465
1548	i'm	19711	sick	19490	tired	19366	feeling	2792	hearing	2038	tire	678	fed	473	bullshit	137	assuming	131	hurting	124	numb	83	surface	80	expecting	79	aware	65	complaining	50	grrrrrr	24	rumors	18
1549	space	13167	dead	2069	alien	1829	aliens	1828	rocket	1475	whale	1317	earth	1287	outer	1230	planet	830	launch	756	ship	557	science	517	jam	497	killer	448	nasa	396	personal	350	travel	295	fill	275	giant	246	discovery	242
542	female	6613	male	5659	model	4313	role	2714	top	2054	females	1572	males	1158	considered	989	figure	987	models	860	gender	687	ladies	588	flat	496	version	492	america's	478	gorgeous	462	attractive	362	species	325	style	314	material	308
543	group	7689	greatest	2362	join	2331	picture	2275	mother	2209	photos	2205	news	2148	title	2143	gift	2140	cartoon	2056	attention	1937	access	1879	father	1799	pedophiles	1698	pictures	1443	children	1441	profile	1368	created	1350	accept	1342	aim	1120
540	fly	20862	wings	6753	high	4234	sky	3019	flying	2408	angels	1856	spread	1391	touch	1247	learn	1073	kite	1009	bird	931	continue	923	simply	834	breaks	792	soar	742	broken	726	wing	721	wind	633	butterfly	605	birds	539
541	run	13466	running	6604	mile	3965	marathon	3598	half	3374	miles	2546	ran	1991	race	1490	walk	1388	training	1204	jog	1194	jogging	1149	track	1102	walking	952	shape	630	legs	375	sets	325	picks	323	runner	295	sprint	294
546	time	16457	back	14171	sp	771	ahh	524	pla	419	alas	244
547	kitchen	7609	floor	6772	table	4109	roof	2588	room	2534	bathroom	2385	bedroom	2346	counter	1324	carpet	1223	ceiling	1202	furniture	917	walls	915	painting	849	floors	765	basement	703	chair	679	sink	678	putting	664	couch	659	wood	650
544	thought	30133	i'd	11960	share	1759	wasn't	1309	harder	1075	it'd	713	figured	679	realized	666	honestly	645	supposed	635	easier	625	random	596	turns	519	would've	417	deep	402	wouldn't	399	process	385	originally	296	realised	245	suppose	173
545	pop	12260	snap	2328	center	1999	bubble	1943	pops	1539	rocks	1288	wrap	1134	drop	1007	popping	996	popped	903	bubbles	607	burst	553	culture	493	blow	384	bottles	340	bottle	318	quiz	312	lock	300	soda	298	champagne	297
548	call	6751	year	3519	girl	2520	guy	1705	raped	1694	son	1534	ugly	1256	bet	1208	fat	1183	country	1163	injury	1130	holds	1030	knew	991	slut	974	no-one	641	hands	635	fighting	600	disease	561	bullying	531	war	494
549	leaves	2399	son	2348	derek	2321	passed	2040	who's	2029	honor	1967	named	1925	minutes	1782	death	1704	country	1599	died	1557	serving	1484	born	1445	wife	1337	fallen	1257	hero	1092	dec	975	news	922	marine	715	afghanistan	504
760	lay	5488	world	3523	die	2895	words	2632	forget	2367	lie	2308	young	2204	bed	1861	song	1543	river	1080	dawn	1056	bury	942	rest	914	send	878	sink	796	roses	579	dying	420	sees	230	gather	206	moonlight	191
761	watching	10621	disney	7313	channel	5023	movies	4918	movie	3540	watch	2863	history	2026	discovery	1597	universal	1584	favorite	1328	classic	890	marathon	656	watchin	580	tangled	573	shows	484	films	367	film	349	hollywood	337	studio	314	cartoons	304
766	project	19427	working	5689	finished	4934	finish	3034	due	2328	english	1969	science	1631	art	1550	projects	1430	spanish	1415	history	1291	final	1220	senior	1094	finishing	838	essay	626	hw	482	mrs	340	biology	296	research	284	portfolio	280
767	ann	4105	jessica	4006	jennifer	2466	anne	2321	samantha	1507	lynn	1459	marie	982	summers	801	amanda	751	katie	537	sarah	519	melissa	469	emily	452	michelle	437	ashley	413	lindsey	407	kayla	403	rebecca	385	nicole	378	elizabeth	371
764	miles	10972	ran	10061	run	4057	walked	3432	km	3209	minutes	2565	mile	2027	running	1383	pm	1347	mi	1329	min	1285	mins	1005	walking	892	pace	746	burned	563	bike	555	calories	436	total	433	hr	353	legs	323
1787	woot	31831	woo	3879	stoked	284	gots	138	payday	120	disneyland	63
414	bus	25912	ride	4948	driver	4801	stop	3154	taxi	2507	missed	1316	cab	1274	rides	669	drivers	633	riding	608	buses	563	mins	460	breaks	380	tour	343	route	306	seat	286	stops	220	waited	167	rode	131	bu	131
415	bad	16864	wasn't	11895	thought	4254	guess	3291	wasnt	3273	isn't	1947	idea	1525	supposed	1408	expected	1239	expecting	896	suppose	891	apparently	638	fault	403	aware	398	ended	395	weren't	329	prepared	278	impressed	229	oops	220	surprisingly	196
416	pack	12629	ready	6610	packed	4835	stuff	4003	packing	3858	bags	2440	wolf	2433	leave	2340	move	1895	bag	1646	clothes	1039	trip	1012	fit	670	boxes	389	backpack	265	wolves	243	packs	231	map	228	kit	165	tend	122
417	don't	46224	care	21063	anymore	3814	honestly	813	pretend	677	act	429	bother	245	stare	189	else's	140	cared	95	breed	38	fooled	14
410	baby	6044	loss	4710	babies	4627	memory	2629	sleeping	2439	remember	2377	break	2286	unlike	2042	born	2041	met	1975	held	1823	suffered	1641	silence	1569	subject	1537	carried	1517	majority	1494	angels	1048	forgotten	861	angel	844	cancer	734
411	st	5747	december	5049	date	4876	october	3493	january	3463	september	3186	august	2191	november	2040	calendar	1760	february	1755	month	1711	june	1508	july	1463	march	1305	set	1291	official	1149	april	1026	dates	951	release	789	sept	438
412	money	41727	buy	7580	spend	4266	save	1977	spending	1732	spent	1566	happiness	1240	earn	1146	saving	888	cash	828	pocket	786	rich	550	clothes	549	cars	492	makin	490	cost	464	waste	382	gas	377	buying	360	amount	335
413	ways	8505	god	7329	works	5485	miracle	5440	mysterious	1597	miracles	1047	separate	871	wonders	606	wonderfully	520	unbelievable	415	worker	385	moves	365	amazed	288	magical	271	unexpected	248	fails	230	invisible	203	witness	192	showed	150	witnessed	147
1384	they're	21918	people	11288	they'll	2949	aren't	2159	ordinary	2119	they've	1980	extraordinary	1121	telling	363	someone's	281	they'd	280	one's	185	convince	181	paranoid	147	else's	124	culture	108	everybody's	95	assume	93	pretending	90	claim	85	unlike	78
1385	ni	14006	don	6602	ll	5554	ve	3782	:\	1696	haven	149	nan	122	wells	118
1386	people	12583	act	10914	grow	8688	acting	2256	mature	2080	childish	1822	immature	1818	grown	1431	age	1297	learn	1256	adult	675	pathetic	659	adults	582	acts	432	balls	432	quit	424	public	374	behave	318	kindness	266	selfish	202
1387	fo	6966	sho	4395	fa	3972	real	3554	sh	3293	eva	2135	damned	2036	nuff	288	fee	246	waitin	239	naturally	184	definately	125	mc	94	fi	93	legit	89	gots	83	dope	79	doe	78	fyi	64	giggles	52
418	experience	12786	bound	3518	wonderful	1398	learning	1187	experiences	1137	experienced	885	painful	672	share	633	judgment	625	changing	583	judgement	487	pleasant	439	exciting	432	journey	412	enjoyable	368	incredible	343	memorable	332	regret	290	opportunity	268	unforgettable	250
419	night	22307	friday	14560	saturday	12276	thursday	2960	sunday	2682	nights	1096	boring	481	lame	363	typical	209	eventful	184	opening	149	usual	139	recovering	97	recover	97	keen	34	night's	34
1382	give	15748	god	7381	strength	5614	lord	5572	rest	1881	weary	1557	faint	1066	trust	1065	handle	996	grow	760	eagles	719	faith	648	wings	599	isaiah	595	serve	572	patience	492	carry	479	soar	412	weak	381	burden	307
1383	good	24986	luck	19958	exams	1326	deed	998	exam	890	results	864	wishing	778	gud	688	finals	589	fellow	307	competition	299	students	268	gd	214	seniors	207	tommorow	206	cheering	175	auditions	171	audition	161	tomorow	160	deeds	87
1254	hate	14004	ugh	8104	stupid	6941	damn	4632	>:	3055	freakin	2250	annoying	1829	hiccups	1128	suck	932	grr	764	grrrr	697	allergies	681	dang	464	fricken	442	ughhh	435	headaches	344	ruin	271	nerves	257	flippin	244	ruining	223
368	lol	28379	lo	5989	fun	3707	hah	1207	atleast	886	btw	639	soooo	631	oops	506	remeber	405	gosh	337	hahahah	318	xp	252	horn	226	sooooo	223	ahh	222	ment	153	awww	153	ahaha	129	atm	88	uhm	68
369	running	23433	run	6674	errands	2905	late	1333	ran	1320	runnin	963	screaming	891	circles	881	runs	805	chasing	679	naked	522	quick	441	chase	408	yelling	310	smoothly	297	places	261	streets	259	helps	215	buses	185	chased	139
366	wid	5095	gud	3397	ma	3136	tym	3050	frnds	2290	fr	1973	dis	1938	luv	1512	frm	1434	lyf	1426	bt	1266	thnx	1202	hav	1138	hv	1044	nw	1039	guyz	827	al	820	jst	724	evry	676	nt	662
367	halloween	20361	costume	8073	trick	5982	party	3692	treating	3352	candy	2418	costumes	2039	treat	1653	dressed	1433	dress	1282	ideas	1097	dressing	786	parties	552	outfit	458	scary	442	october	341	witch	261	decorations	249	scare	239	pirate	219
364	el	6066	ya	4709	ma	3035	ana	2207	wa	1639	al	1619	ba	1415	ala	1131	mn	1106	ad	897	bs	644	ta	586	er	564	eh	531	ra	522	ed	520	kan	468	fi	426	ye	425	wala	379
365	love	25509	miss	5629	baby	3797	ya	3307	nate	2108	muah	2049	wifey	1073	hun	924	babe	816	hubby	741	rip	507	honey	296	sweetie	227	tina	208	sissy	118	guy's	101	sweetheart	74	doggy	52	babys	38
362	dan	5251	ya	1838	selamat	1729	hari	1609	wa	384	ali	273	muslim	260	ia	211	info	198	ra	174	hehehe	158	bin	135	;p	130	muslims	46
363	mentally	4076	physically	3974	exhausted	3445	emotionally	2812	drained	1737	prepared	1193	preparing	1102	retarded	994	completely	847	prepare	522	extremely	502	emotional	451	challenged	421	exhausting	365	stressed	351	literally	329	heavy	315	sudden	315	disturbed	294	attached	270
360	day	33424	happy	22488	valentines	7388	independence	3080	valentine's	2760	pi	623	celebrate	569	celebrating	235	advance	209	veterans	179	republic	177	indians	67
361	football	15401	team	5815	season	4186	game	3860	play	3401	players	2755	league	2698	sports	2397	fantasy	2168	player	1935	coach	1886	nfl	1643	basketball	1577	baseball	1432	playing	1390	games	1218	draft	1016	sport	1002	field	985	rugby	900
380	american	13975	idol	7268	watching	3775	ellen	1627	crystal	788	lee	623	casey	575	pie	550	voted	442	idiot	440	vote	405	native	362	psycho	337	auditions	305	simon	299	ai	274	eagle	265	audition	249	billy	205	african	205
381	feels	12730	weird	10873	kinda	5380	feel	5195	feeling	2984	wierd	2433	bit	1533	felt	1234	strange	1190	odd	692	hmm	607	suddenly	543	sort	349	awkward	342	dunno	328	slightly	276	sorta	253	oddly	217	acting	186	relieved	164
382	pain	7278	joy	4642	sorrow	4235	tears	3990	happiness	3251	sadness	2591	bring	2093	laughter	1735	misery	1231	comfort	948	memories	914	brings	887	grief	886	sorrows	872	fear	776	promise	771	loneliness	758	drown	756	filled	755	smiles	734
383	xa	221391
384	sleep	23378	hours	15358	night	5667	tired	4281	hrs	3837	slept	2952	exhausted	1171	awake	1160	insomnia	900	running	863	barely	535	sleeping	525	waking	490	sleepy	441	function	297	naps	205	managed	195	nyquil	180	solid	178	crash	164
385	lil	8834	lol	5669	sis	4568	big	2842	cousin	2176	bro	1761	cuz	1364	wit	1219	sister	1200	luv	1150	sissy	972	gurl	959	bestie	908	lmao	831	aka	790	sista	742	ily	739	mama	693	bday	689	shout	654
386	pants	10690	jeans	7158	wear	4827	wearing	3091	shirt	2932	fit	2620	pair	2519	skinny	2249	clothes	2034	tight	1641	shorts	1577	size	1491	shirts	1432	underwear	1266	t-shirt	1117	sweat	1086	bought	927	shoes	867	belt	803	ripped	754
387	government	4298	economy	1915	tax	1667	budget	1495	pay	1124	taxes	1066	country	1012	income	994	benefits	972	obama	968	state	966	public	929	cuts	890	health	874	debt	874	jobs	863	federal	859	education	776	poor	762	billion	738
388	eye	25874	blink	2933	blind	2219	shut	1035	tear	1010	pink	907	beauty	828	invisible	680	caught	653	sees	535	contact	506	corner	496	swollen	488	poked	440	drops	389	meets	362	keeping	349	spy	297	ear	291	essential	291
389	ppl	30222	dont	4054	hate	3787	talk	2147	cuz	1155	smh	948	alot	915	act	762	dumb	539	sm	534	piss	476	wen	464	ppls	458	fake	427	sayin	337	bc	283	arent	283	rude	268	talkin	268	bs	263
1253	:	59423	yay	1624	thankyou	65
258	easy	23883	it's	11538	hard	7767	difficult	4036	worth	1601	isn't	1355	simple	1019	task	582	worthy	348	impossible	306	challenging	268	easily	243	recognize	230	challenge	224	someone's	206	fairly	194	ridiculously	183	takin	168	tease	156	surprisingly	141
259	scott	9988	world	8788	awesome	3802	pilgrim	2945	michael	721	epic	704	ftw	484	amazin	275	walker	242	awesomeness	127	brooke	70	owns	43	francis	40	agrees	40	summers	38	knives	27
252	vegas	13547	las	4839	trip	1350	casino	1304	leaving	1054	cali	601	bound	520	stays	483	woohoo	422	viva	322	california	288	desert	275	strip	272	hangover	228	arizona	218	stoked	210	booked	200	utah	154	sd	113	hollywood	111
253	i've	14243	heard	12637	haven't	9776	you've	1542	years	1455	noticed	1398	met	1337	decided	1222	figured	1095	case	1093	havent	905	awhile	849	ages	801	clue	735	recently	586	hasn't	497	realized	430	forgotten	398	apparently	378	looked	377
250	i'm	46285	i've	4304	yeah	1752	thrilled	180	wanting	160	faded	123	psyched	55	doomed	38
251	feels	2547	solid	2118	walker	1420	clay	1309	gear	1169	metal	867	boss	332	excitement	211	snake	167	liquid	147	hunt	146	comming	128	code	126	stalker	120	built	120	register	78	compete	74	victim	56	rising	53	patriots	32
256	proud	10757	choice	5517	perfect	3463	beautiful	2859	pretend	2749	body	2649	clash	2278	titans	2226	walk	2050	owner	1758	past	1756	sexiest	1523	someone's	584	everyone's	528	anyones	368	anyone's	320	teen	226	pleased	157	everyones	156	everybody's	108
257	good	26682	ol	9897	feels	2310	ahh	826	fashioned	383	reminds	293	ole	258	plain	194	dayz	117	pal	116	definately	109	rubbish	43	pals	30
254	wow	14622	lol	9719	crazy	8925	lo	5900	omg	1591	ppl	911	didnt	672	messed	525	realized	482	literally	413	wierd	393	o.o	370	shocked	312	jeez	211	craziest	176	lmfao	164	wasnt	90	jess	54	comming	32	tripping	19
255	fight	3211	ufc	3001	fights	1612	anderson	1233	fighter	1092	round	840	ultimate	745	champion	324	knocked	311	wins	287	champ	284	shane	241	jones	221	evans	184	title	184	jon	183	cooper	182	rounds	176	ftw	165	boxing	158
900	spider	6630	bug	4530	bites	2664	bite	2462	spiders	2366	bugs	2342	huge	2134	mosquito	1846	kill	1824	ants	1632	giant	1605	killed	1580	snake	1424	ant	1361	crawling	981	attacked	655	web	522	legs	502	flying	499	massive	487
901	hour	14435	minutes	11928	ago	8232	hours	5955	half	5724	minute	5234	mins	2827	left	1656	min	1415	drive	1203	woke	1192	ten	1147	sit	1128	late	891	started	790	waited	563	lik	407	fifteen	348	spare	330	lasted	298
168	yo	35062	miss	3430	momma	1355	mama	1309	fat	406	tube	277	homie	195	mamma	156	homies	116	aye	112	jokes	104	soy	74	lemme	46	hahahahahahaha	33	gangsta	32
169	amazing	27829	boyfriend	6868	wonderful	2925	absolutely	2512	girlfriend	2392	simply	842	lucky	838	incredible	724	gorgeous	655	fiance	339	fantastic	266	amazingly	254	amazin	223	incredibly	169	wonderfully	151	talented	123	absolute	122	truely	103	tiffany	48	awesomely	38
164	young	11797	forever	6203	lets	2548	let's	2068	change	1933	die	1785	picture	1204	pic	994	dance	818	adorable	749	profile	637	style	532	current	478	neil	417	ridiculous	321	restless	320	regrets	207	expecting	183	immature	172	younger	155
165	middle	13238	finger	5174	lord	3051	rings	2699	stuck	1519	ring	1323	east	830	tips	651	caught	561	aged	557	index	441	flip	402	wrapped	346	eastern	322	marathon	295	extended	294	onion	277	desert	159	wakes	145	ages	144
166	secret	15715	victoria	2423	secrets	1802	hidden	1046	teenager	933	keeping	890	discovered	747	agent	714	secretly	678	reveal	567	success	552	telling	550	fashion	541	spy	526	garden	524	dirty	479	hiding	476	revealed	421	crush	380	escape	296
167	national	5603	place	3334	team	2638	state	2637	proud	2570	congrats	2461	won	2312	competition	2258	st	2022	anthem	1747	champion	1561	tournament	1471	congratulations	1293	winning	1124	champs	1077	champions	1052	championship	774	finals	767	division	698	district	629
160	guitar	19461	play	9226	playing	6289	hero	4376	bass	3328	drums	1685	learn	1665	learning	1449	acoustic	1289	electric	1287	played	1216	band	1197	string	1189	songs	1101	strings	1098	piano	882	amp	766	playin	703	drum	615	solo	579
161	hate	4144	mind	3172	full	3074	save	2180	pocket	1659	hurt	1586	sunshine	1470	forever	1364	pain	1337	eyes	1300	nights	1071	blood	1048	cry	986	cursed	976	search	964	swear	715	veins	654	worse	645	jordan	500	nevermind	416
162	love	17399	kind	4231	hopes	2323	patient	2079	truth	2007	envy	1827	rude	1726	easily	1649	proud	1629	record	1591	fails	1589	delight	1214	evil	1099	jealous	996	corinthians	924	wrongs	848	believes	714	faith	621	selfish	531	greatest	494
163	can't	27935	wait	27502	til	7516	tomorrow	3743	thursday	1015
908	put	6935	cares	6031	walls	3817	break	3215	give	2947	survival	943	tear	548	worries	500	unnecessary	470	build	459	closing	420	no-one	406	cast	405	art	377	miserable	321	philosophy	312	putting	299	wonders	284	friendship	259	knock	216
909	worth	23462	fighting	2708	living	1344	it'll	1106	dying	1093	effort	1054	remembering	1016	risk	947	trouble	884	what's	746	flash	726	aren't	597	definately	347	cracked	336	troubled	328	sacred	288	losing	266	week's	255	fo	237	keeping	234
1090	day	19813	work	14588	school	3857	productive	498	survived	488	allll	325	hopes	322	alll	161	dreading	47
1091	hotel	11398	room	6859	staying	1855	inn	1349	resort	883	rooms	875	village	772	booked	730	suite	707	holiday	615	checked	514	pool	502	spa	391	california	383	view	341	downtown	273	casino	267	fancy	248	arrived	241	stayed	221
1814	town	17308	place	2349	cape	2272	round	1594	outta	1449	randy	1247	leaving	717	rep	713	london	697	heading	600	office	498	china	463	cod	442	simple	408	competition	390	email	375	bp	371	ends	368	hitting	308	chi	300
1815	walk	30186	walking	4930	mile	4599	shoes	4077	run	2972	walked	2077	crawl	1201	dog	987	criticize	955	walks	853	miles	774	road	749	fly	590	dogs	541	steps	503	campus	471	barely	418	walkin	397	jog	394	jump	375
1816	shop	11123	coffee	2874	pete	1539	shops	1061	town	622	haircut	577	finest	574	exit	442	comp	400	corner	398	drop	378	charity	300	local	276	pet	197	impressed	150	chop	144	nail	129	village	127	repair	123	closing	120
1817	nu	960	ne	951	te	942	di	875	aa	820	tu	707	main	630	ki	553	ni	438	dil	437	vi	389	ch	384	ke	341	meri	323	gal	303	mere	279	hun	276	koi	221	eh	200	naa	178
1810	it's	12875	i'm	12236	can't	9837	there's	5313	i've	3783	feels	3335	wrong	1765	explain	1452	breathe	990	fight	984	steel	509	somebody's	454	knife	421	suffer	145	drown	95	pipe	53	undone	51
1811	day	20812	today	15637	good	14591	chilled	281
1812	whats	25196	mind	8230	wrong	7130	happening	3168	wats	1786	happen	1590	point	946	figure	853	wondering	808	idk	742	difference	537	everyones	404	clue	381	dunno	353	asks	218	nothings	206	agenda	170	hmmmmm	138	poppin	126	happend	106
1813	im	22752	tired	16010	sick	13075	ugh	1365	soo	1066	bein	950	bs	801	bullshit	500	hearing	425	stressed	414	tire	347	dealing	277	lied	89	ppls	51	grrrrrrr	24
1818	fair	20514	county	5318	state	3228	science	2082	rides	700	craft	441	valley	417	orange	346	booth	304	career	304	trade	271	carnival	260	warning	226	madison	188	square	146	derby	126	lifes	114	judging	104	foul	100	participate	83
1819	back	12206	home	8022	work	7500	wanting	6157	finally	3152	needing	1970	coming	1420	vacation	756	desperately	696	badly	272	awhile	228
1098	hold	21695	arms	5361	tight	5143	holding	4866	hands	4535	hand	4346	close	2631	held	2485	breath	1038	forever	1003	wrap	854	grip	651	holds	587	kiss	556	letting	512	grab	464	hug	459	squeeze	418	wrapped	277	rope	248
1099	country	5693	freedom	4926	men	2875	served	2725	veterans	2691	remember	2558	lives	2473	serve	2196	america	2091	serving	1979	women	1942	died	1932	american	1787	military	1722	forces	1565	sacrifice	1563	soldiers	1393	protect	1315	service	1308	bless	1286
1609	chick	9037	hot	2679	cool	2243	chicks	2185	guy	1721	dude	1560	flick	1084	sexy	958	lmao	822	dudes	683	asian	601	coolest	366	dicks	311	hood	212	hott	161	hottest	161	classy	115	girly	100	hotter	96	ghetto	81
1608	shots	7514	vodka	4443	tequila	3708	bottle	3548	rum	3161	drink	2539	shot	2400	drinking	2025	gin	1836	whiskey	1740	beer	1665	coke	1651	jello	1356	drunk	1106	redbull	1032	sprite	768	margarita	654	drank	592	drinks	578	bottles	549
1979	game	15581	soccer	11339	play	6350	practice	4782	baseball	2776	playing	2484	field	2391	football	2350	softball	2249	hockey	2057	ball	1604	boys	1083	games	1051	indoor	830	rugby	816	played	796	player	385	tournament	374	basketball	370	coach	363
1978	st	18752	patrick's	2225	irish	2161	green	1859	saint	1692	patty's	1539	patricks	1537	celebrate	635	patrick	607	parade	451	francis	428	celebrating	309	feast	260	ireland	183	pinch	162	whiskey	115	celebrated	84	nicholas	82	snakes	69	festivities	47
1601	wee	14819	bit	6391	bits	889	xx	846	aww	453	wi	409	pee	382	fancy	339	xo	218	managed	215	cinema	208	cos	208	lads	182	sorted	175	morn	165	fab	164	proper	155	realised	141	pals	112	pint	112
1600	i'm	23995	letting	3375	alive	3281	i've	2690	barely	2604	holding	2190	that's	1805	breathing	1749	moment	1280	standing	1123	falling	1029	living	947	hanging	784	move	744	fine	634	losing	438	kissing	356	held	329	changing	308	senses	269
1603	xa	439234
1602	day	24934	long	13529	work	8905	tomorrow	4993	atleast	249	whew	178	relaxing	118	tomorow	78	longest	33	favorites	18	continuing	16
1605	what's	30420	mind	16950	happening	3108	that's	2964	difference	1325	whats	765	worse	744	asks	410	dunno	182	clue	178	clueless	118	agenda	105	how's	59
1604	group	17735	youth	7561	join	5056	groups	2455	mel	1880	joined	1335	joining	1152	brooks	1034	small	991	church	915	meeting	539	interested	524	members	498	large	454	fountain	326	discussion	241	leader	237	crew	233	retreat	214	member	208
1607	fruit	6005	eating	3599	eat	2338	yogurt	2236	frozen	1949	grapes	1514	smoothie	1223	mango	1221	fresh	1180	ate	1179	watermelon	1075	yummy	1061	strawberries	998	bananas	981	apples	952	taste	897	delicious	883	strawberry	868	banana	839	breakfast	809
1606	tht	11704	dnt	4646	ur	4287	wht	3949	ppl	3220	knw	3136	abt	3051	jst	2398	bt	2274	nt	1836	thts	1561	thn	1402	hv	1266	frm	1251	fr	991	thnk	959	cnt	927	hw	898	hav	802	wnt	785
809	sister	8310	made	7895	laugh	5863	strong	5786	watched	5412	friend	5370	tears	5222	forever	5217	wiped	4755	mom	4482	succeed	4472	cheered	4143	tight	4100	hugged	3940	promise	3866	fail	3163	sisters	2535	drove	1429	moms	1158	stumble	1042
808	lo	7903	ahhh	5879	hu	4348	ahhhh	3122	ahhhhh	2415	sooo	1993	omg	1905	ahh	1688	wth	621	ahhhhhhh	547	hahahah	319	hp	92	fricken	91	stinks	79	woohooo	63	soooooooooo	36
803	show	16056	watching	10116	tv	6690	comedy	3277	shows	2885	watch	2795	favorite	1473	central	1281	watched	1220	bbc	975	television	945	series	929	episode	891	hilarious	865	mtv	842	reality	788	watchin	785	channel	523	episodes	474	tragedy	474
802	dancing	16296	dance	4996	singing	3381	swing	2243	stars	1817	salsa	1512	belly	1005	dancin	804	dances	492	danced	481	dirty	449	moonlight	403	latin	350	dancer	269	lessons	250	turtle	231	dancers	210	birds	205	moves	194	partner	184
801	there's	28097	place	7840	left	2904	reason	1258	chance	1158	hole	863	freaks	781	suddenly	604	downtown	557	dirty	543	plenty	511	hardcore	470	possibility	463	floor	446	nothin	389	glitter	339	terribly	284	whispers	239	stopping	208	echo	125
800	court	6793	justice	3023	case	2014	murder	1788	prison	1744	crime	1519	supreme	1380	judge	1332	jail	1314	guilty	1278	trial	1249	lawyer	1078	criminal	1006	protest	946	innocent	881	legal	747	cases	683	witness	638	law	634	ruled	605
807	miss	22917	:	12491	misses	5840	alot	1407	buddies	855	sooo	830	badly	677	tho	650	terribly	490	homesick	479	besties	139	soooooooooo	72	sooooooooooo	70	dissapointed	50	unreal	40
806	en	4310	som	3428	har	3385	med	3313	nu	2039	om	1913	tt	1298	den	1254	kan	1038	min	1022	lite	974	fr	930	vi	896	du	890	ra	833	bra	690	gon	614	ver	603	ut	552	upp	544
805	:\	442	peoples	125	8d	116	urgh	60	:o	15	nicest	6	:-p	6
804	mountain	7271	climb	4089	top	3780	mountains	3084	climbing	2139	move	2099	view	1338	hills	1122	ladder	1067	hill	922	valley	864	climbed	777	reach	669	higher	546	trees	506	sea	467	peak	462	rocks	452	tower	442	highest	442
1775	world	5090	felt	4961	things	4684	beautiful	3606	heart	3384	touched	3257	helen	2098	swear	878	touch	614	adventure	578	owe	572	touching	505	avoiding	264	craziest	139	danger	136	refuse	129	presence	117	specially	99	unhappy	89	deeply	87
1774	tha	27625	wit	3390	jus	2307	ta	2054	bout	1665	sum	902	chillin	790	bak	452	rite	412	ova	362	fo	359	waitin	345	gon	311	bein	305	crib	303	comin	258	wut	234	lolz	211	sumthin	193	wats	192
1777	ew	3626	gross	3404	nasty	3351	yuck	2821	disgusting	2090	eww	1796	ewww	1372	puke	891	taste	783	vomit	757	smell	738	threw	729	horrible	702	mouth	517	smells	482	sticky	440	fart	370	tastes	341	disgusted	288	icky	283
1776	happy	15503	anniversary	12867	year	11484	years	6927	wedding	2900	month	2349	celebrating	2127	celebrate	1884	parents	1336	married	1259	husband	1226	hubby	826	yr	665	celebration	585	celebrated	539	marks	528	babe	457	marriage	399	grandparents	257	sweetie	210
1771	suck	25472	dick	5857	gonna	4170	vampires	1954	sucking	460	sucked	406	bitches	385	allergies	284	balls	277	lick	247	today's	182	nut	179	badly	168	todays	160	colds	147	basically	144	headaches	131	braces	126	dicks	116	cock	112
1770	home	16327	back	15169	coming	10571	bringing	1734	comming	1705	returning	173
1773	house	10995	home	9955	chillin	9625	chilling	2362	bored	2267	chillen	1754	waiting	1730	sitting	1377	moms	1199	dads	1172	crib	951	txt	605	sittin	466	chilli	352	grandmas	305	babys	244	hmu	241	tx	232	relaxin	225	waitin	214
1772	holiday	18083	season	2281	holidays	2143	chance	1767	poison	1582	enjoy	1502	favorite	1236	weeks	1204	bank	1134	enjoying	906	spoil	780	cloudy	690	booked	568	public	404	hoped	372	inn	364	hangover	282	oak	257	cheer	253	remedy	244
1779	man	46685	he'll	1636	he's	1030	aww	905	manly	594	muffin	501	dies	474	grown	429	blind	331	upstairs	326	main	315	mans	265	wise	249	fellow	186	man's	166	entitled	117	shutting	41	sorrows	37	bench	36	rejected	34
1778	cute	17670	baby	5446	adorable	2980	puppy	2456	sooo	2364	aww	2093	soo	1761	he's	1632	soooo	1612	awww	1502	babies	1387	lil	1306	hes	1160	sweet	1114	cutest	995	kitten	952	nephew	897	she's	814	puppies	790	sooooo	643
608	fool	8044	shame	6553	ignorance	4901	bliss	3786	pity	1326	pure	1124	stupidity	995	act	958	knowledge	718	ignorant	718	dangerous	555	fooled	435	argue	333	remains	322	absolute	282	asks	278	sincere	252	peoples	231	refuse	224	people's	219
1159	day	20828	wonderful	16176	hope	10480	great	5147	blessed	2118	beautiful	1633	fantastic	884	filled	621	goodmorning	389	glorious	300	fabulous	294	;-	56	fiance	29
1158	work	10547	night	9518	tonight	8376	working	6623	shift	6350	late	1544	pm	1358	closing	958	overnight	811	midnight	742	shifts	654	worked	340	picked	198	covering	120	thankfully	78	loooong	27
1155	guy	34318	girl	7378	named	1926	random	1223	met	1175	cute	1096	he's	1054	talking	771	likes	757	hes	735	dude	621	gay	587	asian	564	poor	490	asked	479	cable	419	dating	405	tells	361	homeless	334	thumbs	309
1154	back	9775	florida	2915	fl	2559	orlando	2411	heading	2314	nc	2278	headed	2007	sc	1753	leaving	1299	miami	1008	ny	829	charlotte	729	visit	616	tn	567	bound	559	ky	505	ga	407	area	398	va	388	atlanta	374
1157	fall	35888	asleep	12507	catch	1602	dreams	1445	reality	1175	everytime	457	stumble	423	leaves	370	arms	335	slip	309	inlove	304	easily	183	crawl	167	falls	161	colors	131	trap	111	everything's	69	catches	58	intend	32
1156	happy	19393	fathers	8241	father's	6895	dad	6500	dads	3570	father	3429	daddy	3048	dad's	1033	mothers	970	daddy's	605	daughters	428	papa	381	sons	294	pops	266	uncles	81	sperm	79	childrens	74	figures	74	specially	57	grandfather	53
1151	heh	11197	hehe	7006	haha	3548	:p	1271	;	1254	vu	1225	deja	1082	hmmm	563	holland	419	^_^	387	lolz	384	hehehe	246	^.^	199	esp	197	michelle	140	yaaay	104	lalala	91	tommy	85
1150	ye	7736	ma	3050	yer	2752	aye	2544	wee	1997	wi	1209	aw	1040	fuckin	768	folk	591	aww	541	pure	363	kin	279	noo	277	ken	272	lads	254	arse	252	cos	249	shite	237	gd	205	mate	195
1153	baby	15360	born	8425	babies	5436	pregnant	4245	months	1752	pregnancy	1143	track	1042	birth	834	child	731	raised	573	baby's	561	belly	478	twins	444	babys	370	feeding	354	crib	338	labor	235	formula	225	natural	205	nephew	187
1152	paint	12860	painting	7655	painted	3300	nails	3249	room	3127	walls	1230	color	1019	colors	981	picture	946	covered	928	spray	906	dry	762	brush	545	coat	531	pink	460	bedroom	437	toes	411	purple	390	wet	385	bathroom	349
1555	<3	61432	love	11058	^_^	1047	^.^	328	;d	241	sweetheart	154	hun	85	inlove	75	mucho	65	girlies	49	sweetie	39
1554	church	6392	funeral	5064	pm	2592	service	2553	sunday	1837	memorial	1547	attend	983	wednesday	962	passed	783	viewing	737	thursday	687	held	672	evening	619	services	554	mass	493	attending	420	celebration	331	protest	276	noon	270	attended	266
1551	suicide	5095	put	4595	gay	3302	means	2604	didn't	2027	commit	1922	respect	1552	born	1525	let's	1498	instantly	1288	teens	1125	escaping	1084	committed	864	turning	704	wil	604	murder	536	sin	413	heads	354	contemplating	231	attempted	171
1550	goin	7867	skool	6510	bak	2462	hav	1562	nite	1355	gettin	655	comin	643	gona	640	mornin	562	gunna	555	mite	520	tho	454	leavin	444	ova	407	ima	390	startin	358	wrk	318	prob	314	tomorow	285	sleepin	258
1553	food	31414	eat	6536	eating	3669	junk	3035	ate	1942	hungry	1910	poisoning	1477	fast	1276	healthy	1133	foods	1044	chinese	836	coma	713	yummy	617	delicious	594	mexican	424	starving	424	comfort	415	network	413	solid	401	mcdonalds	380
1552	chaos	3071	body	1790	order	1503	confusion	1416	turns	1353	creates	1117	fat	1040	illusion	1010	figured	983	runs	944	difficult	857	extra	829	shower	782	denial	714	remove	561	dish	540	soap	533	vision	522	volume	479	dawn	474
59	price	9956	pay	6516	cost	4148	free	3227	paid	2292	worth	2070	expensive	1610	fee	1328	buy	1269	cheap	1228	prices	1082	costs	1029	priceless	744	ticket	739	bucks	736	tag	699	low	684	charge	654	paying	644	gas	625
58	di	5871	il	4583	che	4546	la	3528	mi	1635	si	1366	le	1267	con	1199	una	1133	pi	806	mia	748	ti	746	del	725	solo	463	fa	452	cos	427	chi	414	bella	412	su	402	mai	356
1557	mirror	7976	staring	4270	looked	4026	face	3309	stare	3209	eyes	2578	window	1989	reflection	1925	front	1378	view	945	inside	920	sit	829	standing	616	rear	580	blank	555	image	525	straight	524	ceiling	456	reflect	424	bathroom	360
1556	don't	40294	give	8607	care	7188	anymore	2268	frankly	796	advice	567	act	511	personally	223	shy	190	offended	177	recall	105	reputation	97	anyone's	70
1559	sleep	36982	can't	9864	lack	1576	deprived	1421	nights	848	unable	793	insomnia	732	caffeine	394	catching	299	repeat	243	function	217	grumpy	84	snoring	62	overrated	42
54	city	27800	sex	3750	owl	3280	kansas	1723	opposite	1519	york	1476	ocean	1005	sin	671	restaurant	633	iowa	574	pro	560	lights	486	progress	452	chicago	421	hall	421	con	388	motion	379	oklahoma	370	windy	355	sleeps	323
57	fan	18251	page	3625	big	2716	fans	2605	pages	2271	biggest	2243	huge	2025	groups	1154	liking	957	join	847	hits	646	group	531	ceiling	501	joining	383	joined	366	official	309	recommended	216	loyal	174	suggestion	155	adding	121
56	you've	21846	you're	10177	you'll	2097	hurt	1976	there's	1368	realize	1271	nobody's	620	sing	576	we've	534	one's	532	you'd	435	everybody's	331	warned	317	kidding	295	shown	249	forgotten	207	they've	206	satisfied	191	fault	181	realise	178
51	tonight	11676	goin	7465	whos	7310	who's	4762	whats	2308	town	2004	comin	1805	keen	1728	tonite	674	tommorow	275	carnival	260	comming	250	tmrw	207	gig	94
50	car	8834	tire	6372	flat	4659	fixed	2513	tires	2320	fix	1837	truck	1597	oil	1595	engine	1423	broke	1048	replaced	1045	brakes	1025	brake	991	changed	952	wheel	934	blew	822	replace	805	parts	798	bike	742	spare	742
53	great	29200	night	13494	time	11667	fantastic	453	catching	437	evening	267	lastnight	261	workout	181	:o	129	topped	41	inviting	18	jessie	17
52	kai	2960	ta	1914	den	1443	ti	1214	tha	1191	se	1155	tis	1091	tin	821	oi	710	mia	706	ton	640	mas	544	thn	386	tn	255	auto	188	mera	167	gt	159	;p	133	mn	126	ama	79
537	dollar	7610	dollars	6869	million	6666	bucks	3780	worth	3191	penny	2834	money	2304	cents	1399	cost	1281	buy	1151	spent	1090	hundred	1014	pound	959	bill	959	ten	897	dime	868	billion	856	pocket	806	cent	797	bet	754
55	lucky	20017	girl	2536	found	2065	charm	1042	leaf	733	jealous	383	bastard	270	bastards	223	losers	179	incredibly	178	gal	176	realise	171	magically	133	irish	118	retire	115	penny	103	fortunate	93	horoscope	90	champ	84	casino	63
535	status	19028	copy	6053	update	5638	facebook	5027	paste	4670	put	4621	type	3948	comment	3654	comments	3608	entry	2603	urbandictionary	2509	updates	1830	updating	1617	insert	1525	witty	930	updated	622	posting	561	previous	480	urban	472	dictionary	469
534	hit	13781	hard	4858	spot	4578	hits	2493	hitting	2196	bottom	2141	rock	2105	soft	781	sack	634	floor	605	fill	564	poison	421	bikini	421	turns	309	headed	286	eventually	271	victim	268	damage	237	bounce	226	hittin	220
533	pm	7981	tonight	5400	show	4090	st	2127	saturday	1989	free	1913	ave	1886	open	1622	starts	1571	8p	1359	playing	1341	street	1265	support	1084	cafe	953	bar	863	gig	835	mic	798	lounge	797	join	785	performing	736
532	wind	14562	blow	7144	blowing	3986	blows	3220	winds	1540	blew	1290	bubbles	1259	blown	973	whistle	879	mph	756	chill	721	leaves	708	imma	647	steam	634	fed	632	air	619	standing	612	breeze	587	ground	571	windy	557
531	whoop	11700	whoo	2528	sleeps	362	tonite	325	homies	254	thingy	235	yaaay	152	yessss	39
530	wrong	23063	prove	4960	thought	2617	ways	1552	raise	1391	proved	1340	glass	1147	freaks	1135	prepare	851	spelled	707	horribly	693	killed	612	dirty	536	proven	525	loud	486	possibly	481	correct	424	freak	417	proves	390	turns	365
539	:	41250	amazing	4002	soo	616	thankyou	346	soooo	293	btw	277	ahh	260	goood	124
538	band	25496	camp	4311	practice	3975	marching	3915	rock	3069	jazz	1157	concert	1000	parade	833	competition	743	bands	574	guard	548	rubber	542	pep	497	beatles	383	banquet	371	ban	366	rehearsal	363	section	362	geek	352	members	299
1558	honey	5324	sugar	5037	nice	2675	liz	1935	sweet	1147	spice	1136	bun	613	bunch	433	heck	429	luke	381	master	357	wan	356	brown	356	coat	353	daddy	343	lemon	282	nut	260	pour	239	aka	218	helps	206
536	battle	8789	fight	4752	victory	3531	fighting	3129	win	2562	war	2212	defeat	2077	enemy	1888	defeated	1416	won	1392	meet	1077	sword	1029	battles	938	fought	732	bands	727	warriors	696	epic	691	conquer	578	enemies	538	protect	514
429	things	16791	regret	6745	happen	2691	live	2598	forget	2543	learn	2335	past	2055	move	1131	happened	1115	accept	1089	matter	980	shouldn't	612	regrets	354	wasted	231	dwell	213	robert	176	importantly	172	regretting	138	undo	123	inform	106
428	talking	17415	people	13775	stop	7420	telling	3214	talk	1996	idea	1018	annoying	786	they're	661	clue	634	count	373	assuming	302	judging	281	trash	276	texting	265	honestly	265	hopes	248	shouldn't	225	quit	218	ignoring	181	arent	160
1399	notice	5639	amy	3646	suddenly	3348	noticed	2915	disappear	1398	remembered	1054	disappeared	1021	realized	981	sign	978	magically	850	happened	746	they're	724	appears	698	wonders	629	looked	616	turned	597	appeared	524	realised	515	reminded	490	coincidence	419
1398	ryan	9968	robert	6545	kristen	1819	stewart	1236	rob	574	private	538	saving	470	rod	444	andrew	310	frost	298	jackass	244	miller	209	jordan	156	meg	142	leslie	124	stephanie	120	wilson	115	willy	112	patrick	109	kennedy	107
1397	work	22915	gotta	11930	ugh	5414	sucks	2054	guess	1335	fm	558	atleast	464	sux	329	tommorrow	306	ughhh	247	bleh	193	tomarrow	176	tmrw	140	welp	97	ughhhh	91	bueno	65	stinks	47
1396	add	12647	skype	9626	msn	2870	yahoo	2141	aim	1679	chat	1375	account	808	webcam	757	messenger	706	email	520	pin	482	bb	426	twitter	319	names	283	contacts	259	myspace	257	added	227	uk	227	convo	193	chatting	183
1395	it's	13943	silver	2794	there's	2544	cloud	2462	dark	1666	lining	1335	mushroom	883	depressing	727	infected	354	clouds	348	we'd	228	rooms	197	pills	197	electronic	154	affect	127	handed	125	unreal	119	hammer	117	shaped	114	affected	98
1394	night	26546	saturday	10248	friday	10065	tomorrow	3538	spending	2807	sunday	1611	forward	1320	spend	1015	sat	775	thursday	514	exciting	428	takers	339	partying	307	babysitting	259	plans	258	babysit	92	planned	84
1393	cow	5013	free	2276	milk	1982	cows	1841	entire	1731	women	1557	worth	1499	men	1402	goat	1390	pig	1141	mad	1117	realize	1097	buying	1073	nowadays	871	buy	845	here's	745	update	720	wondering	714	marry	590	horse	584
1392	sleeping	17338	sleep	12450	schedule	2035	wake	1592	pills	1538	pattern	1439	pill	1131	waking	1112	messed	1021	awake	906	dreaming	870	insomnia	734	sleeps	643	normal	510	wakes	435	sleepin	410	habits	255	screwed	223	tent	218	cycle	218
1391	slow	15611	fast	7833	moving	3353	motion	2730	move	1545	moves	1453	pace	1240	steady	1117	quick	907	movin	707	slower	670	faster	474	process	420	progress	327	smooth	321	burning	315	sickness	281	quickly	238	passing	192	computers	185
1390	ring	8690	gold	7211	diamond	3283	silver	2072	diamonds	1929	necklace	1385	precious	1236	rings	927	bought	742	jewelry	582	engagement	490	chain	385	neck	330	rare	327	pandora	296	charm	286	circus	279	tone	269	bells	268	shiny	248
1443	today	24232	yesterday	5597	sucked	4890	worked	2314	luckily	84	rocked	74
229	lol	40148	jk	6176	lmao	1603	idk	719	funn	414	lmfao	364	lolz	313	kidding	181	ily	168	hahahahaha	108	sorta	93	rofl	89	ewww	85	kool	81	hahahahahaha	74	hmmmmmm	58	creeper	29
228	fish	20869	fishing	4418	caught	3409	sea	2601	tank	2508	swimming	1333	catch	1328	water	1274	shark	1143	chips	814	plenty	752	feed	675	swim	665	sharks	657	aquarium	654	pond	632	drown	614	bowl	594	tuna	586	fry	575
227	voice	17466	hear	8791	hearing	3132	heard	2653	amaze	2050	talk	1966	sound	1920	sounds	1457	listen	1167	losing	1124	cease	1085	voices	993	tone	960	calling	927	annoying	438	telling	404	loosing	310	sounded	285	sounding	277	deaf	274
226	tomorrow	14824	school	11293	start	9243	ready	6292	classes	3641	excited	3546	starting	1451	orientation	1353	summer	1172	wednesday	781	college	662	tuesday	556	nervous	231	kindergarten	78	internship	63	psyched	62	volunteering	19
225	news	19052	feed	4675	fox	2297	breaking	2154	heard	1261	flash	1152	bbc	1053	local	959	channel	956	story	841	report	810	cnn	787	media	734	newspaper	711	latest	649	article	483	daily	461	shocking	429	sports	414	reports	390
224	im	17846	gona	6212	wana	5325	dont	5265	realy	2674	cus	1477	gota	1172	coz	698	tomorow	532	whos	485	ther	385	outa	339	tonite	307	finaly	276	tis	255	il	209	tomarrow	208	stil	194	welp	164	somthing	162
223	dead	6499	zombies	5830	zombie	3411	ding	3055	walking	3034	brains	2321	dong	1408	killing	1361	kill	1252	plants	1153	nazi	1142	humans	530	ring	446	killed	409	shoot	357	killin	306	witch	304	spoon	287	happening	282	tasty	254
222	love	22516	find	6465	weird	4901	call	3698	fall	3331	join	1448	life's	1279	mutual	981	satisfying	82	wierd	71
221	texas	8585	houston	4110	austin	3523	dallas	3286	tx	2561	headed	1440	heading	907	arizona	815	phoenix	702	bound	697	az	491	area	343	mexico	303	oklahoma	299	downtown	284	walker	235	cali	210	tech	186	east	179	ranch	158
220	hard	28411	work	19354	worked	4366	working	2926	core	1338	harder	1271	pays	824	paid	592	day's	576	dedication	437	laziness	315	success	289	workin	271	motivated	267	har	255	reward	226	worker	217	earned	192	concentrate	160	determination	107
151	megan	6978	jamie	4275	fox	2943	claire	2225	annie	2148	oliver	1019	wilson	891	hanging	786	amy	424	lindsey	364	emily	319	transformers	295	nicole	293	maggie	289	katie	282	lauren	261	stephanie	237	marie	235	jordan	225	steph	221
150	missing	24644	:	2712	badly	2297	circus	1729	wishing	1233	clown	751	sanity	697	terribly	595	misses	555	missin	546	=	463	restore	406	rally	394	somethings	365	bummed	319	:-	277	something's	273	buddies	172	sweetheart	143	persons	109
153	move	21922	forward	11366	moving	9728	past	1767	moves	851	helping	799	ahead	799	direction	475	backwards	470	foward	464	bust	412	holding	261	movin	258	barely	250	letting	247	pushing	208	mountains	202	curious	186	opening	174	forgetting	169
152	8	13405	coz	6834	cos	5629	dont	4902	wanna	4792	wont	883	dunno	270	sin	253	8	175	fed	161	tune	149	no-one	73
155	bum	6467	lazy	2741	bu	1982	grumpy	191	poo	187	ew	104	smelly	102	eww	100	willy	97	contemplating	83
154	month	21759	end	7400	year	6763	months	2276	october	2094	december	1067	september	1044	november	879	february	877	january	852	beginning	519	entire	470	august	331	national	297	it'll	217	employee	214	period	169	begining	165	atleast	164	longest	139
157	miss	4481	put	3789	wanna	2772	single	2474	cute	2031	;	1980	relationship	1960	inbox	1474	:p	1307	falling	1212	talk	1148	kiss	1051	yo	849	hug	848	:	835	valentine	667	sexy	609	;d	602	cutie	589	shy	574
156	told	22106	didn't	3491	called	3325	asked	2439	wasn't	1689	thought	1602	looked	1595	gave	1381	guy	1363	apparently	1223	telling	922	couldn't	798	needed	704	story	660	wouldn't	658	showed	572	compliment	557	lady	550	supposed	489	talked	475
159	gonna	13084	alright	8861	lie	7846	stand	6052	that's	5214	watch	5086	cry	3536	hear	3210	burn	2852	hurts	2628	li	599	everything's	412	goodbye	411	everythings	352	rihanna	284	eminem	192	desert	148
158	special	23189	made	4407	making	4265	edition	1053	guest	822	limited	814	extra	782	olympics	686	shout	672	helped	634	occasion	610	rare	549	share	516	effects	479	appearance	474	retarded	266	mention	235	surprise	214	dedicated	164	memorable	161
1293	lost	5209	days	4925	nice	4495	everyone's	2758	fighting	2747	marines	2634	families	2260	prayer	2200	afghanistan	1534	enjoy	1187	support	1145	re-post	905	request	881	everyones	718	praying	435	service	372	photos	295	videos	211	rage	168	guy's	145
1162	:	40300	haha	1908	text	951	yayy	886	yayyy	815	yayyyy	455	yaaay	226	dayy	141	todayy	137	goodmorning	117	tmrw	97	maria	76	yesss	60	gooood	43
1807	sun	11597	tan	8128	beach	4959	burnt	3427	pool	2589	sunburn	2240	summer	1768	burn	1695	tanning	1689	skin	1226	burned	865	swimming	820	sunburnt	818	lines	768	sunburned	676	pale	639	laying	620	lay	585	ouch	582	lake	559
1806	rain	18099	wet	8106	mud	2374	soaked	2209	cold	1958	water	1902	raining	1676	dry	1596	walking	1530	umbrella	1444	soaking	1038	rained	952	pouring	863	rains	725	heavy	664	flooded	626	covered	510	flood	506	freezing	492	smell	440
1805	day	18491	today	13483	good	10657	nice	5933	hope	3592	surprisingly	107	swell	18	brutal	12
1804	complete	7520	piece	7197	missing	4642	puzzle	3152	pieces	2693	found	2311	total	2041	fit	1425	utter	853	putting	584	box	580	opposite	428	completed	283	disaster	234	parts	214	collection	211	shock	189	bits	186	exact	98	nonsense	94
1803	night	18534	sleep	10687	tonight	7589	rest	2174	hoping	1471	night's	1206	needed	876	decent	249	sleeps	139	stink	46
1802	bed	18281	sleeping	3611	pillow	3518	couch	3428	blanket	1970	comfy	1957	laying	1613	sheets	1447	pillows	1415	floor	1219	mattress	1213	sofa	1126	lying	1002	comfortable	992	warm	962	beds	928	snuggle	750	blankets	732	soft	729	cuddle	718
1801	tv	17601	watch	10724	watching	7181	shows	5214	channel	2661	show	2654	cable	1418	channels	1342	television	1210	remote	1110	des	798	direct	732	watches	656	hd	440	commercials	432	network	431	flipping	383	porn	379	dish	378	series	339
1800	:	13476	:	3219	haha	2397	ahh	1239	8	741	ahhh	679	hahah	599	ughh	422	ou	358	funn	353	d:	352	yayyy	208	heather	195	texts	139	uhh	111	hiccups	98	rofl	93	courtesy	88	nevermind	81	technically	69
1809	man	5984	times	3894	ultimate	1974	measure	1956	challenge	1937	ping	1863	stands	1560	fm	1436	pong	1254	moments	861	comfort	638	vincent	464	intense	445	table	412	definately	262	luke	218	moves	203	thrown	178	treats	134	mistaken	112
1808	ng	17015	ch	8414	di	3922	bi	3667	gi	2489	ti	1319	dc	1203	con	976	mu	950	ra	948	vi	908	nay	849	cu	830	ai	777	bu	727	bc	713	:x	578	mai	504	fi	501	chi	497
1256	crap	21251	holy	20189	shit	6421	cow	2120	load	1120	batman	1086	spirit	578	sh	498	ghost	346	balls	265	bull	260	holly	179	o.o	171	scares	148	poop	139	scaring	137	o_o	124	friggin	117	effing	96	frickin	94
1948	sign	11147	depression	4601	long	4178	put	3960	strong	2910	point	2868	leave	2848	show	2795	won't	2600	weakness	2500	mental	2155	lives	2101	suffer	1948	health	1938	support	1765	disturb	118	illness	103	anxiety	79
1949	lovely	14375	bones	2833	tower	1445	designed	689	nature	546	kiss	517	speech	505	booth	484	trick	459	terror	217	nathan	213	pleasant	168	richard	116	defense	100	icy	86	angela	54
1257	attack	11807	heart	9721	panic	4272	attacks	1743	anxiety	1388	disco	1117	massive	1097	gave	986	defense	637	filled	466	mini	411	chest	323	hole	309	attacked	272	shark	264	sneak	241	terrorist	238	sudden	215	allergy	208	pit	184
1942	santa	16058	christmas	5348	dear	3229	claus	1997	naughty	1711	monica	1388	barbara	1294	cruz	1128	secret	893	xmas	529	presents	452	brought	427	elf	388	jolly	283	maria	273	dressed	216	suit	215	ana	176	lap	169	workshop	158
1943	bear	17125	bears	6271	teddy	3220	gummy	1969	polar	1700	worms	938	chicago	747	hug	469	minus	468	panda	428	chasing	331	pooh	296	giant	289	witness	242	burden	241	bi	233	shoe	186	sour	178	stuffed	142	grin	134
1940	st	27515	louis	4316	century	2160	cloud	1970	deeply	1456	saint	1244	loving	1201	charlie	857	heights	656	strength	593	thomas	591	pete	511	courage	500	paul	465	johns	346	joseph	242	vincent	234	robert	230	aug	224	francis	132
1941	small	16828	big	12240	town	5472	world	4711	living	916	city	864	midnight	861	lonely	782	sweat	591	train	590	large	499	tiny	435	compared	396	tall	367	livin	339	raised	271	detroit	235	amount	161	cities	152	worries	148
1946	harry	26135	potter	22241	part	2143	deathly	2088	hallows	1724	hp	1203	midnight	1138	prince	858	ron	645	marathon	644	showing	569	musical	521	trailer	373	twilight	368	premiere	350	nerd	277	pt	254	magical	251	wizard	231	sally	219
1947	yu	24954	dnt	2237	kno	1967	wat	1543	wen	1117	tht	1044	ima	551	lik	384	smh	365	neva	311	ily	275	lyk	215	wht	196	needa	189	yer	150	gurl	132	wut	116	wnt	110	kool	109	mann	106
1944	di	3507	dan	3027	ke	1846	hari	1508	ini	1296	yang	1197	selamat	1133	kita	747	lagi	706	jam	644	yg	634	saya	505	ada	449	mau	353	anak	319	sama	306	allah	283	thx	214	kami	210	nya	207
1945	i'm	42551	i've	5142	scared	2561	you're	2087	afraid	1966	won't	1186	dreamer	498	shy	490	terrified	476	lonely	401	pretending	258	drowning	190	you'd	188	aware	169	misunderstood	123	lying	117	disappear	76	surrender	75	desperately	66	blunt	33
818	world	20419	person	20356	coolest	2558	happiest	2370	entire	1750	luckiest	1332	favorite	1310	bestest	1293	wide	1209	alive	1103	earth	863	planet	859	sweetest	530	smartest	368	nicest	312	prettiest	242	sexiest	222	hottest	168	strongest	160	funniest	150
0	turtle	3412	giant	3160	shell	1778	ninja	1740	turtles	1509	penguin	1494	mega	1321	midget	1127	teenage	807	naked	526	named	502	huge	413	awkward	365	wonders	358	homeless	350	sea	322	saved	280	shark	246	pet	235	robot	194
1255	free	37064	set	10786	freedom	1861	truth	1189	sets	803	wifi	603	chains	600	slave	369	prison	336	mental	279	minds	241	trial	227	fallin	169	almighty	168	rules	160	setting	151	guilt	142	offering	135	worries	132	trapped	127
810	adam	10735	adams	1988	bryan	1923	miranda	1571	eve	1184	samuel	1155	john	885	sam	528	nathan	287	luke	261	steve	178	amazin	158	entertainment	150	danielle	140	magical	113	keen	108	leader	104	courtney	98	christine	93	disappear	87
811	trip	27877	road	12057	field	6411	planning	2029	trips	1897	mission	842	travel	497	packing	466	quick	412	chicago	356	ski	351	spontaneous	343	camping	323	europe	302	zoo	272	guilt	271	florida	270	tripping	233	cali	216	mini	213
812	doo	6832	lo	4558	dee	994	hmm	933	attract	521	hmmmm	383	haircut	371	dah	337	dunno	324	tooo	234	ahhhh	226	snacks	195	hmmmmmm	182	bo	161	gang	155	fred	101	dip	98	toooo	79	snack	79	aye	76
813	haha	19357	lol	7050	:p	4493	:d	4327	;	1782	hehe	1325	jk	1293	;p	1254	btw	483	hahah	405	awsome	337	hahahaha	318	xp	267	hahahah	232	;d	212	hyper	208	ily	180	kidding	176	jealous	170	>:d	151
814	goodnight	20600	bed	6679	facebook	5369	fb	3951	goodmorning	1123	goodnite	1044	sleepy	990	facebookers	805	al	696	bedtime	655	peeps	633	fellow	596	folks	475	peoples	252	signing	230	goodluck	209	:o	165	welp	108	bid	46
815	standing	3117	top	3020	sees	2658	sit	2350	jump	2265	cry	2131	sitting	2118	part	2041	opportunity	1868	popcorn	1686	teenagers	1436	difficulty	1167	yell	1164	screaming	1028	middle	744	flip	728	justin	683	glasses	646	camera	572	deck	571
816	louise	2070	laura	1800	emma	1606	xx	1522	sophie	1375	amy	1374	emily	1316	hannah	1292	sarah	1114	lauren	1093	charlotte	1055	katie	1016	chloe	998	lucy	919	james	914	alex	827	rebecca	789	sam	778	jade	765	rachel	755
817	im	20736	gunna	17042	soo	1158	prolly	456	todays	426	atleast	381	whos	373	comming	253	tommorow	234	pumped	197	everyones	153	tomorrows	152	tmrw	118	everythings	111	itll	108	startin	68	shits	65	thts	63	havnt	49	babys	42
1991	greek	27
1250	day	20978	long	9833	gonna	9682	looong	853	loooong	793	boring	706	ahead	693	todays	640	tomorrows	396	tomorrow's	350	tiring	113
1622	business	17178	steve	6549	mind	3402	jobs	1407	handle	790	plan	677	personal	552	nobody's	440	usual	429	rip	414	peoples	302	cards	300	takin	296	pleasure	279	folks	223	owner	186	elses	185	venture	184	people's	177	defeat	173
1251	i'm	26584	it's	8740	gonna	6782	set	1058	doubt	812	tearing	499	ain't	462	stopping	383	balcony	372	i'ma	283	causing	58	beans	57	sooooooooooooooooooooooo	4
1621	ugly	10155	twin	3202	extreme	2887	pretty	2174	twins	1691	betty	1552	truth	1207	cities	783	sweater	771	cute	749	edition	429	confuse	247	personality	201	alike	170	towers	157	disagree	141	pal	115	americans	102	attractive	89	yikes	85
1490	time	22302	it's	18316	long	7248	honestly	1114	incredibly	455	they're	332	honest	303	trust	246	hasn't	180	predict	152	retire	27
421	rain	44866	pouring	2187	sun	1792	pain	1527	rainbow	1476	drops	1402	falling	1073	sound	922	heavy	908	clouds	901	wash	831	roof	712	drop	700	raining	675	parade	669	window	667	shine	420	cloud	407	umbrella	394	rains	382
1492	:	17014	:d	13204	xx	6151	:p	5965	;	2597	:	1834	xxx	1722	haha	1207	tho	634	aswell	246	goood	236	xxxx	195	amazin	144	awsome	130	atm	117	exited	109	baba	105	goooood	97	:|	78	hyper	62
1493	it's	22795	that's	15775	don't	4468	thing	2319	we're	2246	kind	1394	supposed	1254	yeah	1253	ridiculous	1078	guess	813	matters	703	cool	650	counts	497	happening	472	basically	412	depressing	274	motto	125	hiding	108	technically	94	unfortunate	93
1494	prince	7229	jake	5624	kate	3755	charming	1709	fresh	749	william	747	bachelor	515	cinderella	485	stubborn	384	jon	337	happily	249	pad	230	directions	179	handsome	162	repeat	128	royal	119	egypt	106	fairytale	89	charles	88	narnia	86
1495	wear	11884	wearing	7862	shirt	6337	suit	4160	purple	2517	clothes	2474	mask	1977	wore	1263	dress	1144	bathing	1006	pajamas	1003	dressed	962	uniform	943	suits	883	shirts	775	t-shirt	749	outfit	732	pink	725	hat	717	sleeve	677
1496	break	26814	spring	17985	winter	9371	summer	3729	fall	2025	officially	1110	semester	673	formal	586	hurry	556	quarter	438	seasons	317	autumn	302	begins	261	olympics	144	midterms	112	offically	53	lasted	45	snows	27
1497	watching	19779	sitting	9263	couch	5377	tv	5316	movies	3058	laying	2285	eating	1887	relaxing	1805	enjoying	1290	chilling	1062	cuddling	769	sleeping	675	lazy	672	hubby	611	sofa	569	whilst	549	sat	465	drinking	447	cartoons	343	pjs	335
1498	facebook	8289	page	3502	click	3187	select	2230	feed	2168	news	2072	wall	1921	posted	1813	ads	1798	posts	1584	link	1550	settings	1529	tab	1499	profile	1398	top	1358	pictures	1316	account	1225	choose	1107	photos	942	agreed	888
1499	morning	24312	woke	10468	early	8350	bed	4799	breakfast	3699	coffee	1821	waking	1318	08:00:00 AM	803	late	787	saturday	739	woken	668	dressed	570	o'clock	569	sickness	397	noon	308	jog	248	pt	180	sunrise	159	downstairs	142	workout	125
423	eh	8759	dun	8511	wan	2664	tat	648	dunno	639	-.-	620	wif	581	pls	481	le	443	sec	414	tis	384	cos	379	wth	359	abt	324	ar	286	argh	276	africa	274	gt	231	gd	217	wah	214
1626	boo	16210	bo	5428	yah	4014	missing	1179	missin	750	booo	338	accepted	226	forgiven	216	grandparents	216	faults	174	grew	158	thang	152	guest	150	judgment	127	whore	124	wifey	117	bff	113	awwww	101	scare	90	companion	78
1700	wait	26317	can't	20516	till	13021	thursday	1734	tuesday	1384	untill	1374	wednesday	1346	weeks	1103	june	424	january	167
1701	list	15763	things	4994	bucket	2329	add	2188	making	2061	top	983	added	929	sit	918	names	683	adding	667	checking	638	realized	573	mental	519	checked	497	hospital	497	guest	485	imaginary	482	walls	474	daily	416	corner	340
1702	met	13948	person	7676	friend	3833	meet	3065	glad	3052	cool	2815	nice	2679	talk	2085	guy	1461	talked	1320	hang	1098	coolest	1046	nicest	991	we've	743	sweetest	521	eachother	396	helped	344	personality	344	honestly	344	friendly	307
1703	calling	13654	stop	6046	call	5977	hear	4224	called	1918	callin	1746	texting	1159	names	1024	they're	666	telling	558	calls	524	bother	500	cops	455	prank	362	queen	326	irony	107	yelling	102	determined	95	telephone	91	biscuit	80
1704	south	11730	park	7020	africa	4536	african	1201	america	1070	mexico	835	central	824	france	732	episode	689	par	625	pacific	462	england	416	bend	399	west	323	ghana	321	asia	278	haven	259	lions	233	kenny	199	australia	163
1705	friend	33363	bestest	4213	mine	3861	dear	3002	maya	1959	buddy	1373	hang	1012	dearest	369	pal	307	catching	166	chatting	159	oldest	150	companion	98	beloved	97	hangout	90	suggested	72	exact	70	bud	65	tease	44	deed	31
1706	=	31044	=	4296	=	1671	hehe	554	#N/A	305	>:d	248	^.^	137	yayyyy	87	'	79	yayy	75	sweetie	70	awwww	57	boyz	55	yayyy	51	>:	26
1707	doesn't	27045	exist	4595	anymore	4256	doesnt	1681	leaves	1296	sound	995	hopes	937	apparently	935	wise	788	listens	768	kisses	633	involve	539	shouldn't	525	require	399	cease	351	include	320	exists	283	pretending	256	refuses	219	necessarily	205
1708	i'm	24689	gonna	21326	it's	5114	make	2185	figure	680	blow	518	rest	516	boring	234	crying	137	struck	134	dirty	129	clock	81	prince	73	trick	72	twelve	42	fond	18	assuming	11
1709	ich	5667	die	3269	ist	2728	der	2366	das	1944	es	1574	du	1301	bin	1188	den	1016	mein	842	von	778	hat	759	mal	546	um	502	gut	499	dem	441	tag	360	german	351	wer	331	des	292
1624	:/	16869	ms	11546	http	11129	video	3063	youtube	2263	fm	416	rt	301	posted	265	dc	263	thomas	257	kevin	224	commented	197	uploaded	141	tumblr	99	shares	97	8d	84	demo	74	orleans	66	preview	47	unsure	45
424	lo	18363	omg	9154	lol	5462	yay	4204	sooooo	1742	forgot	816	wheres	473	lmao	231	yayyyy	149	ahhhhhh	106	phew	64	awwww	62	somthing	60	uhhh	52
427	school	11590	tommorow	8414	tommorrow	4662	yay	3062	foward	217	tomorow	209	orientation	174	exited	96	comming	91
426	send	4130	horse	3684	nails	3092	farmville	3021	boards	2813	bricks	2731	stable	2509	finish	1962	board	1515	complete	1389	barn	1146	brick	1120	wooden	1077	building	1028	gift	759	gifts	688	windows	610	nail	600	plz	583	build	533
1128	good	21333	morning	14927	afternoon	5399	evening	5013	night	4551	spent	873	productive	342	pleasant	232	delight	224	swell	214	case	191	eventful	122	facebookers	102	technically	44
1129	love	51062	yo	2147	adore	1202	xoxo	1088	admire	332	extraordinary	145	absolutly	136	genuine	94	entitled	66	mentioned	49	growth	40
1120	random	14574	strange	3870	stranger	3751	thought	1976	strangers	1717	fact	1654	complete	1382	weird	1165	acts	779	randomly	745	conversations	585	kindness	515	danger	490	places	429	faces	362	conversation	353	adding	282	odd	217	spontaneous	213	wierd	198
1121	years	33497	ago	17508	remember	2118	yrs	1358	born	1114	ten	1099	happened	1076	passed	1075	died	1065	married	860	met	837	changed	638	lived	457	twenty	446	remembering	424	decade	296	ages	268	hasn't	262	birth	251	moved	233
1122	work	17860	back	13929	home	8331	days	6659	tomorrow	2601	till	653	alas	73	ahhhhh	62	scrubs	28	accidently	16	anticipation	10	soooooooooo	9	wayy	6
1123	drama	4445	bullshit	3757	head	3401	shit	2289	games	2278	sneeze	2220	allergic	2188	fake	2118	liars	2062	faced	1726	queens	1552	nasty	823	pieces	512	bull	395	bs	163	kings	137
1124	universe	8915	entire	3082	wonders	1435	earth	1033	carl	955	center	871	infinite	853	exists	573	created	571	exist	565	guide	565	beginning	561	planet	546	imagine	517	galaxy	499	sign	482	discover	463	corner	446	disappointment	439	space	389
1125	duck	6083	ducks	3013	mighty	1748	goose	1645	rubber	986	loose	838	pond	751	fed	688	feeding	501	feed	477	grey	393	oregon	346	donald	310	row	270	cover	251	walks	216	dive	211	canadian	170	dodge	169	vodka	126
1126	weekend	9705	week	8319	weekends	7226	long	5415	days	5202	working	2815	monday	1839	fast	1351	short	898	hooray	438	holidays	384	including	183	tgif	169	partying	120	extended	98	dreading	53
1127	hand	29429	hold	5813	left	2063	holding	1808	helping	1797	hands	1538	lend	1307	raise	1240	understand	1079	palm	993	reach	883	held	659	touch	602	han	589	arm	565	grab	454	shoulder	454	pocket	417	factor	382	sand	369
524	guess	10710	lol	7695	dang	5575	gotta	2478	sigh	2446	kinda	2082	hmm	1528	idk	1381	forgot	1130	stuff	1074	welp	965	hmmm	926	sucks	880	messed	854	smh	810	eh	588	wel	467	hm	382	geez	231	ummm	206
525	happy	45533	birthday	18718	birthdays	3365	camper	1756	wishing	979	wished	333	happiest	265	endings	173
526	job	2483	maid	1880	nanny	1854	pay	1719	cook	1485	teacher	1355	mine	1350	security	1291	nurse	1191	holidays	1170	harder	1085	holiday	1061	parent	1056	handy	832	worked	814	paid	756	personal	578	mommy	525	cleaner	441	coach	412
527	bitch	25241	fuck	2161	karma	2124	ass	2025	slap	1689	son	1504	lifes	1394	life's	1316	dumb	1197	hoe	1081	pimp	881	sexy	771	bitches	754	slapped	567	slut	565	whore	546	pussy	260	heartless	258	choke	229	stole	181
520	canada	6928	game	4346	hockey	4130	gold	2241	usa	1799	win	1701	team	1423	canadian	1295	olympics	1293	won	1254	medal	751	cup	714	sharks	649	stanley	639	chicago	589	winter	561	pens	446	sport	422	boston	408	fans	397
521	fun	6538	tag	4928	awesome	3706	laser	2271	sonic	2120	quest	1105	blast	729	played	687	crew	625	adventure	386	tagging	242	frickin	183	guaranteed	166	anytime	139	owned	88	dynamite	63	attached	60	arena	39
522	tomorrow	21563	school	18339	starts	7344	excited	4151	tuesday	764	dreading	754	starting	638	yipee	157	bummer	34	noooo	28
523	ne	3374	ut	2316	sh	2129	nt	1646	pr	1631	st	1563	ve	1464	ss	1110	fr	1095	ch	1036	ll	941	pe	929	ar	663	ing	566	ab	524	ther	508	rt	496	ck	493	ad	378	tt	292
1014	fu	13194	express	3312	panda	3037	kung	1780	hustle	1142	ing	1128	pineapple	804	kin	581	awesomeness	368	polar	292	dangerous	183	hella	176	asian	171	bu	153	sh	150	karate	114	yessss	70	roommates	66	advise	60	buck	45
1015	thing	13116	part	9192	hardest	8885	letting	2416	goodbye	1357	easy	960	knowing	863	moving	833	learning	699	ending	585	easiest	537	finding	359	waking	351	explain	326	harder	317	dreaming	293	picking	286	figuring	205	sensitive	184	utter	167
1016	special	8629	hour	5217	leave	4907	children	4008	illness	3948	education	3649	copy	3515	won't	3366	cure	2945	paste	2908	accepted	2840	understand	2631	extra	2601	contagious	2216	honor	1750	invisible	1626	understanding	1578	struggle	1042	ms	1017	daily	1016
1017	wrong	25386	what's	10008	there's	2486	somethings	1522	figure	1298	something's	1149	admit	881	direction	711	act	676	everything's	638	nothings	534	telling	513	nothing's	321	master	315	terribly	284	lane	272	everythings	271	hurting	254	fate	239	matters	238
528	feel	13149	feels	9323	crap	9196	poo	3277	shit	2708	piece	1314	pile	1009	absolute	950	lik	909	useless	858	total	584	complete	536	worthless	531	awful	512	load	436	poop	420	shite	367	rubbish	304	utter	287	crappy	259
529	work	54813	yard	704	doesnt	666	uni	415	day's	388	volunteer	334	schedule	278	repeat	96	placement	55
1012	wait	27884	can't	26721	till	6397	weekend	3325	nevermind	289
1013	ba	10037	^_^	7058	hehehe	2283	hehe	1549	ah	964	hehehehe	670	hmm	514	>_<	372	o_o	299	bah	273	hmmmm	241	t_t	230	gosh	221	tama	202	wasnt	197	awww	154	sooooooo	146	bam	98	xp	96	baba	71
1234	you're	59702	you'll	1401	you've	1060	aren't	496	lying	335	smart	305	lonely	300	pretend	175	darling	141	jerk	134	bust	111	unique	104	liar	95	whore	93	satisfied	73	darkest	73	mister	59	laziness	35	bloom	34	faded	28
1235	commercial	5986	ad	4462	commercials	3059	tv	1654	guy	1488	ads	1018	advertising	991	annoying	668	superbowl	586	snuggie	468	showing	431	noticed	429	product	428	hilarious	414	target	414	axe	328	marketing	320	ridiculous	286	spice	283	FALSE	268
1236	flu	13182	sick	7381	swine	3616	shot	3062	stomach	1746	bug	1186	fever	1141	caught	986	shots	656	virus	578	fl	540	sickness	529	nasty	426	aids	422	jab	401	arm	373	disease	361	recovering	309	symptoms	279	infected	221
1237	man	36355	iron	9340	chef	440	cave	307	flat	297	slave	178	tin	134	fist	129	properly	120	beg	116	grin	110	compliments	106	pump	102	remembers	85	finest	79	property	76	spends	61	credits	47	rod	44
1230	jump	11197	jumping	4303	cha	3873	bridge	3139	cliff	2329	jumped	1447	catch	1287	rope	718	building	710	edge	492	plane	447	fence	369	bottom	359	slide	353	jumps	311	hop	308	diving	301	ft	291	skip	234	exercise	223
1231	freedom	2693	soldier	1962	warrior	1920	safe	1144	cards	1087	normal	1029	center	946	american	849	recovering	838	pass	832	obama	759	wounded	683	card	652	dash	632	army	594	georgia	558	medical	558	washington	557	address	551	victory	525
1232	hours	25964	straight	7629	sleep	5966	days	3515	couple	2759	slept	2183	worked	1585	working	1236	total	705	twelve	686	spent	592	exhausted	492	priorities	421	skip	169	fm	162	eleven	136	longest	109	solid	94	combined	64	studied	59
1233	life	24805	make	13138	lemons	4173	easier	2901	lemonade	2178	hands	1575	throw	1211	throws	1102	lemon	653	squeeze	433	tequila	420	juice	420	salt	365	vodka	236	grape	233	someones	184	demand	167	handed	111	sour	99	fork	68
1238	plan	23760	planning	2296	plans	2266	master	1776	planned	1284	lesson	929	action	845	god's	584	escape	490	ahead	455	chief	377	general	354	possibly	339	pla	337	stopping	319	failed	297	prepare	284	written	270	fails	229	hasn't	212
1239	ashley	6046	nicole	4270	brooke	1986	jordan	1968	heather	1512	hanging	1297	marie	1001	paige	969	bailey	798	emily	718	kayla	709	katie	637	amber	634	erin	601	alexis	546	miller	471	mall	426	sarah	406	jessica	400	courtney	392
438	god	12566	pray	9729	dear	7371	put	5168	cure	3670	cancer	3097	won	2204	amen	2143	copy	1147	paste	1109	hangover	501	request	423	miracle	269	touched	158	struck	32
439	shopping	30530	christmas	6480	grocery	3513	clothes	2092	xmas	1978	online	1901	shoppin	1835	spree	1264	lunch	1105	mall	986	minute	737	shop	720	store	534	shoe	516	centre	403	cart	395	x-mas	317	walmart	282	stores	254	momma	228
436	summer	22993	days	3653	winter	2937	vacation	1256	nights	1242	hurry	1233	school's	653	autumn	629	beach	606	enjoying	592	summers	459	heat	367	slow	347	schools	276	mistaken	254	guessing	243	silly	240	longest	182	misunderstood	174	indian	166
437	week	15798	weekend	11909	great	5891	forward	4377	hope	3478	fast	3377	monday	2907	end	2781	coming	2364	start	1917	hoping	1604	ready	1069	sunday	520	flew	163
434	cuz	21330	im	19981	dont	7951	mad	3265	wont	1900	didnt	961	aint	923	pissed	850	kinda	707	doesnt	548	shes	373	scared	364	upset	332	fucked	190	wouldnt	178	idc	170	sux	169	shouldnt	130	theyre	85	stil	70
435	make	38807	difference	6102	doesn't	5504	sense	3211	effort	1403	someone's	384	they'll	321	appearance	316	bother	174	worthwhile	145	attempt	130	someones	108	inspire	101	differences	100	triumph	91	sacrifices	72	starving	67	impact	64	buck	58	volunteer	44
432	happiness	14170	pursuit	2075	depends	1490	misery	990	sadness	947	gold	898	content	804	depend	740	determined	537	satisfaction	500	circumstances	456	situation	453	greater	374	create	357	seeking	356	pursue	330	pleasure	311	miserable	301	seek	299	plenty	283
433	tomorrow	9922	zoo	3805	rally	2516	pep	1534	assembly	696	prep	690	flags	434	pals	239	columbus	212	kiddos	183	pumped	154	aquarium	111
430	class	11921	science	3533	exam	2770	lecture	2734	professor	2550	psychology	2479	psych	1866	test	1784	notes	1596	studying	1434	philosophy	1414	semester	1161	prof	1102	history	1087	final	1087	midterm	1017	teacher	1011	biology	948	study	948	quiz	840
431	don't	22673	feel	9999	anymore	2367	beg	1814	begging	1652	honestly	806	knees	538	clue	155	hollow	83	creeping	51	sympathy	47
1630	service	10146	customer	4297	community	3029	public	1402	announcement	998	customers	875	company	770	suggestions	707	center	696	entertainment	665	services	518	enemy	478	rep	467	charity	442	provide	428	delivery	401	respect	393	tolerance	385	excellent	330	forgiveness	327
238	happy	30881	birthday	25496	wishing	1967	sister	1863	years	1682	wonderful	1422	st	1024	daughter	899	nephew	827	brother	825	son	788	turns	691	niece	682	special	582	celebrate	527	sis	485	darling	402	oldest	389	mommy	371	celebrating	331
239	type	13283	eyes	2983	put	2770	closed	2163	nose	1923	typing	1903	elbow	1681	erase	1144	keyboard	932	swear	524	answers	423	delete	390	mistakes	389	mistake	343	explain	307	typed	296	lick	268	slam	239	caps	225	barely	181
234	empty	9924	half	7839	fill	7715	full	7464	glass	2476	blank	2042	filled	1584	space	1314	void	1065	gap	555	cup	513	hollow	443	filling	435	spaces	435	handed	411	pockets	389	scratch	346	shell	305	emptiness	283	promises	282
235	fuckin	19719	fuck	7807	shit	6063	ass	1809	bitch	1644	pissed	1596	bitches	1067	bullshit	979	wtf	821	fucked	488	outta	394	fuckers	372	piss	291	fucker	264	goddamn	263	retarded	213	shitty	197	effin	157	amazin	139	dumbass	136
236	ir	1499	su	1411	est	791	ar	650	ne	551	sum	459	ego	456	bet	449	gal	441	ad	417	pro	376	dar	374	ut	372	jo	364	ant	349	nos	222	latin	196	kai	187	cum	168	amor	162
237	tomorrow	14439	day	12411	today	9262	work	8469	hoping	4653	forward	2061	it'll	774	dreading	589	technically	58
230	god	11587	prayer	8400	pray	5538	prayers	3955	family	3763	daughter	2275	fb	1859	post	1828	bless	1578	answered	1366	stage	1179	praying	1140	chain	919	king	841	answers	814	friend's	805	cancer	793	diagnosed	739	asked	668	needed	608
231	home	17114	work	12689	ready	8019	hubby	3561	bed	3340	relax	1901	dinner	1797	shower	1746	relaxing	1462	heading	1213	nap	1194	early	1040	chill	437	supper	405	snuggle	252	cuddle	238	tanning	161	pj's	57	buds	27
232	baby	47083	girl	4636	poor	851	missin	765	lonely	760	ooh	494	ohh	351	firework	255	ohhh	246	teenage	234	crying	230	twas	199	gurl	196	darling	178	noo	177	doll	157	ohhhh	137	beware	114	babys	96	bump	79
233	sleep	9582	slept	9175	woke	6763	hours	5688	morning	5002	till	3736	bed	3306	pm	2601	yesterday	1591	sleeping	1544	til	1481	stayed	1397	nap	1265	hrs	1151	noon	1131	haven't	916	afternoon	632	08:00:00 AM	613	midnight	435	barely	408
1	asked	17848	told	7378	wanted	3468	replied	3422	boy	1838	looked	1752	gave	1482	lady	1375	response	1313	walked	1116	couldn't	959	reply	861	answered	769	smiled	685	doll	578	grew	421	showed	366	wrote	362	explained	314	refused	272
146	job	28757	find	4661	hunting	4234	hunt	2730	searching	1089	hiring	966	apartment	941	asap	939	search	780	quit	570	ideas	491	suggestions	468	offer	330	decent	320	continues	320	treasure	282	jo	275	places	257	offers	235	desperately	205
147	im	45435	glad	4761	dont	2572	ive	2381	scared	1986	didnt	1346	tho	330	guessing	311	wasnt	301	couldnt	273	shouldnt	128	unsure	61	grounded	53	cus	49	terrified	48	foward	32
144	training	11036	class	3249	session	2138	gym	1736	personal	1606	fitness	1519	basic	1115	trainer	983	zumba	932	certified	841	potty	739	sessions	545	vista	426	intense	422	workout	396	teaching	392	thai	323	seminar	306	trained	298	aid	267
145	light	3033	eyes	2518	dark	2270	soul	1879	sky	1787	sun	1714	stars	1283	darkness	1258	moon	1233	wind	1147	earth	1116	beauty	1063	shadows	1059	shadow	934	dreams	797	soft	775	deep	713	clouds	701	skies	635	dawn	634
142	happy	21242	mothers	12528	mother's	10049	mom	5948	mother	4188	moms	3878	mommy	1361	mom's	934	mama	773	momma	412	mums	256	daughters	186	specially	102	aunts	86	grandmas	74	brunch	69
143	allowed	6104	shouldn't	5564	aren't	2900	guess	2589	apparently	2325	isn't	1934	anymore	1798	supposed	936	grounded	870	forced	671	telling	667	decides	393	joke	354	scares	337	technically	319	shouldnt	269	insane	229	basically	222	quickly	208	solid	193
140	club	18860	girls	5106	strip	1501	join	1429	meeting	1403	breakfast	882	host	866	clubs	653	comedy	550	joined	524	drama	471	handle	455	cinema	438	watchin	431	anime	430	tonite	381	key	377	glee	327	joining	298	member	282
141	allah	7636	peace	1346	muslim	1127	wa	845	al	820	deeds	662	paradise	561	reward	549	messenger	545	beloved	532	sins	425	blessings	417	prayer	405	mercy	388	grant	341	forgive	301	almighty	289	pleased	282	muslims	281	reported	276
148	kno	12042	dont	6973	jus	5520	wat	3295	cuz	2841	ppl	2818	ur	2751	tht	2669	wut	2486	dnt	2335	bout	1312	wit	1264	idk	1135	didnt	970	rite	894	doin	796	sayin	722	wht	705	tho	691	ima	638
149	hate	12007	mondays	6343	suck	3789	monday	2638	tuesdays	2061	ugh	1885	fridays	1522	hates	1387	thursdays	1286	sundays	1286	case	1134	wednesdays	1121	ruby	815	tuesday	689	mornings	620	weekends	553	saturdays	442	rainy	362	ughh	169	dread	150
123	family	34676	friends	5855	reunion	3878	guy	3449	members	2547	member	1683	addition	1010	extended	827	newest	820	abc	519	visiting	461	gathering	430	cousin	414	modern	377	cookout	326	relatives	295	host	228	outing	198	tradition	180	bbq	177
1832	maria	2414	carlos	853	juan	766	jose	757	garcia	616	ana	576	lopez	465	andrea	452	jessica	398	diana	302	daniel	291	alex	281	victor	273	stephanie	271	nicole	261	laura	254	michelle	254	cruz	248	jonathan	204	marie	201
1833	life	34391	short	4881	live	3060	lived	1944	life's	1074	complete	987	realize	838	enjoy	813	waste	801	struggle	649	point	552	precious	538	stress	488	challenge	486	longest	486	knowing	475	adventure	411	lines	388	miserable	372	lifes	370
1830	tree	10453	trees	6576	leaves	2141	grow	2062	seed	1769	plant	1743	seeds	1377	fruit	1305	reap	1277	forest	1251	branch	1133	roots	1127	grows	889	palm	785	pine	716	harvest	703	planted	641	leaf	587	falls	587	ground	574
1831	today	13289	work	11842	tomorrow	7658	lunch	3396	yay	2505	meeting	2332	noon	1225	productive	452	payday	335	picking	206	client	115
1836	place	9373	belong	6383	world	5801	find	3155	understands	900	belongs	679	goodness	671	base	472	falls	455	spirit	339	command	265	escape	197	kindness	187	patience	186	embrace	114	guessed	103	dreamed	80	violent	60	oxygen	35	immortal	33
1837	ja	6412	iv	975	nyt	923	ss	504	pit	436	ty	375	ole	372	ku	324	tt	214	vain	180	vi	164	kin	121	mist	102	eli	92	ist	85	ep	65
1834	:	9664	fun	4905	haha	4311	danielle	2285	marie	1565	hanging	1165	sooo	1067	soo	916	hahaha	886	hahah	698	hah	696	kayla	402	cousin	265	walker	255	bestie	213	abby	208	babysitting	171	roomie	170	hangout	157	funn	140
1835	carry	6735	heavy	4633	weight	3292	shoulders	2864	lift	2343	lifted	2077	load	1605	burden	1325	carrying	1071	huge	1001	shoulder	978	spirits	922	lean	860	lifting	830	arms	464	lighter	427	bear	426	breaks	350	carried	348	higher	313
1838	ma	34167	ana	2218	wee	1205	dos	841	aww	828	uno	603	missin	548	bk	373	bro	365	sis	302	fone	285	princess	262	dam	240	wid	211	lyf	127	flippin	127	awww	113	dayz	81	alas	74	juan	63
1839	post	10584	remember	6401	comment	5446	finished	5187	reading	5171	speak	4937	surprised	4894	memory	4577	you'll	3951	paragraph	2933	you've	2699	experiment	2100	pops	1976	read	1854	suprised	605	social	390	spoken	127	responses	68	u've	58
939	day	16404	great	11112	today	9341	hope	4386	remember	837	begins	599	quickly	479	catch	436	reach	279	calling	269	patience	244	stars	243	passion	213	fading	210	strength	206	dreamer	185	wave	183	flower	173	ocean	154	wind	140
938	due	15253	date	8714	fact	1778	lack	1645	weather	1447	cancelled	1134	postponed	797	technical	736	dates	685	canceled	583	difficulties	518	closed	503	assignment	500	notice	471	interest	441	cancel	374	unable	363	conditions	363	circumstances	346	apologize	328
933	turn	28673	turned	4625	lights	2812	upside	1466	turns	1265	turning	983	toss	849	tables	772	everytime	479	backs	450	frown	357	heads	348	corner	343	choke	338	it'll	288	signal	276	switch	274	drown	257	swag	240	volume	210
932	love	34723	falling	9544	fall	4393	fallin	1343	inlove	1237	deeply	823	fallen	822	catch	742	deeper	698	responsible	598	darling	400	simply	390	dj	315	held	273	force	196	awful	196	cracks	194	gravity	167	truely	101	slipping	100
931	die	12425	ek	9869	en	8776	wat	4633	te	3791	om	3449	net	3086	van	3002	kan	2711	op	2615	se	2309	met	2107	al	2044	dis	1658	wil	1587	ni	1551	toe	1366	hoe	1025	wag	799	vi	737
930	drink	19404	drinking	4899	alcohol	4132	beer	3160	drunk	1898	drinks	1586	hangover	1346	alcoholic	1290	cheers	785	booze	718	drank	660	beers	627	liquor	622	mix	570	liver	480	thirsty	430	straw	379	drinkin	375	plenty	365	stiff	363
937	magic	11107	fairy	5626	tale	2720	tales	2026	magical	1417	tooth	845	exist	629	tragic	578	fairytale	570	gathering	546	tail	546	powers	484	illusion	479	ending	418	happily	402	kingdom	401	dragons	345	princess	326	disappear	310	spell	292
936	ya	50876	dig	1081	betta	265	tellin	212	buddy	200	yer	195	comin	177	hells	98	sista	84	shoulda	78	spit	56
935	huh	7559	lol	6605	guess	5880	lo	5307	wow	3586	fancy	3142	hmm	2257	kinda	2249	weird	1997	cool	1497	sounds	1021	hmmm	855	interesting	829	apparently	822	suppose	521	wierd	333	gangsta	127	jeez	77	penny	75	gangster	59
934	chris	16017	brown	12540	charlie	1999	gordon	1622	dan	504	shannon	316	rihanna	309	cow	285	takers	230	zach	187	ft	179	bobby	173	symbol	162	ian	125	lucy	124	eyed	104	mj	103	ban	100	corey	94	nikki	72
1955	stupid	35969	hates	1447	ugh	1367	crap	1078	grrr	927	freaking	822	useless	577	ruined	545	grr	508	pointless	473	>:	353	gah	329	ruin	295	ruining	278	grrrr	255	thingy	247	-.-	233	messing	200	effing	195	retarded	189
1954	happened	11900	hell	7217	wondering	6139	wtf	4947	idea	1886	heck	1735	wonders	1280	clue	879	honestly	822	suppose	516	hasnt	304	whoa	302	dunno	295	disappeared	241	wot	240	woah	232	jeez	122	manage	115	wut	111	considered	78
1957	yang	15586	dan	12494	kita	6220	yg	5818	ini	5360	di	5032	aku	4539	ada	3616	allah	3551	saya	3532	hari	2468	apa	2420	tak	2109	dia	1766	kami	1230	lagi	1156	dapat	1051	kau	974	ke	958	ia	934
1956	im	38826	tired	5464	glad	3213	ready	2143	soooo	1077	liking	219	alittle	158	exited	115	greatful	56	obsessed	50	beleive	36	sucky	13
1951	water	32658	hot	3839	bottle	2558	drink	2352	shower	1378	heater	879	drinking	718	pipe	684	boiling	671	glass	638	thirsty	609	dry	571	balloon	555	sink	537	frozen	529	bucket	523	salt	502	drank	494	balloons	490	basement	483
1950	guys	12308	hey	10895	ya'll	6965	miss	3491	peeps	3356	folks	942	y'all	703	catch	555	how's	371	buddies	333	ther	274	c'mon	250	peoples	189	sheesh	148	hows	114	pals	67
1953	eaten	7092	dragons	6832	fire	5802	won't	4297	didn't	3392	sitting	3214	case	3119	unstoppable	2991	related	2776	shower	2696	copy	2575	breathe	2542	paste	2265	remaining	2103	armed	1889	extinguishers	1347	terrifying	799	ashamed	776	re-post	667	dragon	664
1952	early	11648	work	8892	gotta	7898	bed	6778	tomorrow	6424	wake	5056	morning	4778	sleep	4762	mornin	2429	tired	1652	goodnight	601	morn	502	tmrw	339	headin	233	gota	228	hrs	223	bedtime	175	earlier	162	babysit	150	tommorrow	147
1959	finally	10695	found	5198	hooray	3996	managed	3251	woohoo	1744	hurray	1618	months	1180	pleased	575	rid	547	successfully	421	convince	212	thankfully	198	luckily	150	relieved	96	throws	71	refuses	37
1958	called	9659	girl	4990	boy	4494	putting	3434	stupid	3215	ugly	3116	hoping	2974	fat	2807	learning	2694	lot	2378	hrs	2258	there's	2257	makeup	2246	abused	2057	starving	2022	spends	1951	studies	1938	tripped	1700	disability	1585	lbs	1428
829	cancer	16335	lost	7806	continue	6830	battle	6251	family	6144	put	5883	memory	5668	conquer	4575	patient	4208	hour	3739	won't	3580	member	3420	copy	3319	paste	3208	month	2962	page	2249	loving	2248	fight	1709	honor	1616	cure	977
828	wait	27289	can't	22967	till	10815	friday	2593	weekend	2587	saturday	2543	tommorrow	680	thursday	673	hurry	270
825	katie	4861	factor	3874	cole	2273	win	1258	matt	1210	rebecca	719	joe	566	simon	530	direction	467	twins	446	brilliant	340	joke	330	rubbish	320	andrew	304	voting	263	voted	260	cos	248	mary	233	wi	233	awful	216
824	tooo	1655	sooo	1537	soooo	1467	alll	1116	sooooo	996	toooo	834	goood	801	meee	786	meeee	588	youuu	538	gooo	531	soooooo	452	allll	446	gooood	375	ohhh	324	ughhh	294	ohhhh	270	goooood	268	mee	243	sooooooo	236
827	earth	6348	planet	6081	global	4037	warming	3353	save	2224	turns	2000	i'd	1925	slowly	1236	changing	641	share	596	melting	566	degrees	542	trees	477	burn	470	hotter	449	waste	448	captain	423	plastic	423	plant	416	environment	414
826	don't	15762	deserve	7493	give	3656	settle	3498	refuse	2724	issue	756	simply	652	settling	544	stress	540	advantage	478	reasons	458	accept	431	offer	382	stubborn	344	settled	312	honestly	306	granted	261	refuses	250	personally	193	flaws	184
821	isn't	17807	it's	9694	doesn't	3188	anymore	2268	natural	1813	supposed	1535	working	1419	aren't	1100	ironic	1026	helping	861	apparently	720	happening	656	letting	621	intelligence	484	hasn't	350	surprising	321	selection	303	stupidity	284	sarcasm	218	match	179
820	november	9222	tango	9077	sierra	8301	uniform	7716	oscar	7546	alpha	7494	romeo	5481	yankee	4878	delta	4842	echo	4298	papa	3996	india	3973	charlie	3912	hotel	2213	juliet	2091	foxtrot	1677	instructions	698	wilde	657	whiskey	140	redneck	139
823	party	33275	tonight	6007	dance	2254	lets	1658	halloween	1370	rave	1257	tonite	1110	slumber	989	bday	853	wasted	832	rockstar	777	basement	420	hoped	284	wheres	230	farewell	177	parties	114	outfit	114	disco	113	formal	67	x-mas	65
822	lets	28828	hope	13501	alright	1290	doesnt	748	stays	404	continues	284	gooo	275	lasts	209	cmon	178	trend	90	smoothly	61	hype	37
1483	wanna	8217	update	6463	added	5406	:/	4458	status	3806	ni	3029	ve	2895	http	2591	net	1162	bonus	383	smiles	289	:@	142	download	113	install	82	giggle	39
1482	d:	10069	tt	3251	t_t	2402	dx	1227	>:	1003	>.<	991	nooooo	930	noooo	894	gah	753	nooo	739	dammit	710	noooooo	539	d:<	513	han	479	argh	411	o_o	346	damnit	314	omfg	311	:'	249	-_-	244
1481	time	14596	rush	8055	big	2526	crash	1870	august	899	sugar	781	crave	694	hurry	670	rushing	526	traffic	478	crush	223	runs	212	plenty	208	sudden	163	geez	160	caffeine	87	element	36
1480	martin	7250	jr	4950	king	4641	luther	2825	drive	1321	darkness	1207	dr	1134	ricky	588	lawrence	506	kin	466	returning	406	adding	354	taught	328	loss	320	precious	307	thousands	306	enemy	296	solid	263	unknown	259	deeper	212
1487	heart	18060	break	8163	pieces	7010	breaks	3531	broken	3448	fall	2193	broke	1732	breaking	1712	tear	1547	falling	1423	torn	1286	pick	1270	piece	1151	ripped	977	shattered	845	bits	717	million	654	falls	437	tore	395	tearing	368
1486	weather	21697	nice	7013	loving	5878	perfect	3635	beautiful	3396	enjoying	3100	degree	2286	enjoy	1513	lovin	1478	beach	1001	lovely	989	gorgeous	727	crappy	637	cooler	567	warm	442	bipolar	400	delightful	362	nicer	344	shitty	326	sunshine	315
1485	day	21243	today	15730	good	13498	longest	804	dragging	97
1484	hands	17485	put	8364	clap	4039	wash	1268	bare	1056	von	988	holding	897	gods	729	shaking	628	touching	495	god's	400	raise	377	tied	376	pockets	299	hips	266	puts	259	wave	258	satisfy	233	shook	226	movin	210
1489	doubt	6802	find	3605	mind	2520	full	1289	stroke	1267	furry	1190	move	955	trouble	622	benefit	460	rhyme	455	slips	429	walls	336	doubts	307	shadow	267	fills	264	unable	252	intelligent	245	refuse	196	seeking	146	refuses	132
1488	ke	878	az	696	va	360	wid	359	ba	348	ye	339	ta	303	dar	267	thnx	243	courtesy	210	roy	209	jai	209	che	201	ra	181	cheers	180	das	180	ham	175	delhi	166	memorable	122	har	113
797	tattoo	10939	tat	3310	thinking	2127	tattoos	2026	ideas	1520	ink	1276	gettin	1141	idea	1011	artist	788	shop	745	arm	661	wire	581	design	526	piercing	469	suggestions	399	tattooed	376	sleeve	368	possibly	303	symbol	302	wanting	273
796	kevin	7096	julia	2739	hart	1258	hah	1092	julie	773	needles	613	corey	441	aka	282	bacon	280	ashley	198	har	194	hahahah	176	smith	165	engaged	122	melissa	117	aaron	106	walker	103	correction	88	jonas	72	babes	67
795	lame	8241	excuse	3665	you're	2903	cooler	2361	pathetic	2286	cool	1817	thinks	1280	cuz	1122	tricks	510	sounds	508	shades	421	hide	420	excuses	407	arm	396	designer	233	losers	229	loser	162	figured	156	bummer	147	embarrassing	121
794	party	26783	birthday	16077	bday	4115	b-day	2790	surprise	1761	celebrate	1561	st	1532	saturday	1519	celebrating	1474	bash	1378	cake	1021	blast	823	celebration	773	graduation	768	planning	747	suprise	394	invited	363	grad	359	parties	353	sister's	343
793	school	18919	tomorrow	9357	yay	2016	skip	1947	tmrw	1626	ughh	455	exited	267	dreading	262	bleh	233	skipping	168	ew	151	yaaay	122	eww	121	ehh	110	orientation	97	ughhhh	89	ewww	70	skipped	53	foward	50
792	animal	9598	animals	6497	zoo	4147	dog	1661	humans	1592	stuffed	1333	pet	1116	dogs	850	wild	819	planet	794	species	755	shelter	731	elephant	680	feed	625	creatures	539	cats	517	farm	484	breed	441	lions	438	tiger	411
791	pay	13881	money	7193	paid	7085	bills	6883	paying	3060	bill	2905	job	2844	rent	2168	month	2097	check	1731	debt	829	owe	746	paycheck	701	taxes	689	bucks	672	extra	659	gas	657	cash	632	dollars	556	dollar	536
790	eat	22736	hungry	14999	food	6556	feed	1921	lunch	1895	starving	1441	drink	1408	breakfast	814	cook	649	bite	633	thirsty	577	stomach	474	hunger	463	eaten	422	fed	415	grab	322	feeding	305	hurry	254	fridge	214	supper	211
1719	friends	28991	facebook	4834	talk	4038	close	3785	friend	3178	enemies	2811	talked	1687	met	1406	needing	1237	strangers	1230	set	1218	haven't	1063	closer	937	guarantee	866	buddies	690	lovers	595	level	450	haven	379	closest	377	homie	246
1718	perfect	24683	person	6665	finding	2943	perfectly	2559	minds	2287	discuss	2045	imperfect	1794	learning	1362	ideas	1235	timing	1099	perfection	1025	small	1004	average	948	flaws	885	events	675	creating	559	imperfections	458	nobody's	403	combination	247	circle	165
799	good	17144	night	14997	gonna	11473	feeling	4158	tonights	2754	tonight's	2647	gotta	2320	feelin	994	gunna	520	gooood	159	goood	145	goooood	119	agenda	93	festivities	87
798	movie	11173	film	7663	watched	3315	action	1647	movies	1637	inception	1587	story	1420	films	1276	plot	1192	acting	1121	director	878	actor	804	fiction	769	scene	762	scenes	737	brilliant	715	actors	697	characters	689	cinema	648	character	631
612	phone	28122	broke	4787	cell	4313	lost	3315	dropped	2852	broken	2373	screen	2277	call	2038	phones	1701	touch	1583	text	1479	texting	820	contact	767	charger	733	works	724	stolen	700	fixed	695	fone	651	pocket	608	toilet	573
613	saints	10819	cowboys	5461	game	5152	colts	3968	win	3450	won	2261	beat	2162	superbowl	2073	dallas	2064	dat	2027	lets	1792	football	1643	vikings	1332	giants	1194	fans	1047	orleans	1044	eagles	887	dem	547	cowboy	495	saint	491
610	love	32322	gotta	5542	emily	5254	stops	315	sings	273	tune	204	craziness	30
1139	dreams	21777	TRUE	10297	dream	6336	hopes	4419	chase	1261	nightmares	1074	future	1040	reality	892	tru	818	follow	761	fears	634	chasing	624	imagined	614	belongs	591	pursue	553	beauty	524	shattered	472	direction	472	crushed	428	fulfill	405
1138	lab	12790	report	5137	chem	3851	chemistry	3186	bio	2418	exam	2334	physics	2169	final	1192	reports	1131	computer	1096	organic	1013	biology	827	lecture	759	practical	706	science	623	hw	617	quiz	497	midterm	316	progress	262	assignment	238
1133	point	3589	fact	3471	longer	3016	including	2759	remember	2729	country	2506	america	2362	veteran	2304	amount	2100	states	2043	check	2013	wrote	1940	blank	1927	united	1548	honor	1246	thankful	904	support	831	freedom	437	soldier	307	troops	287
1132	lonely	13799	feel	10855	feeling	8850	sad	4379	depressed	2636	empty	1104	hopeless	1009	loneliness	660	romantic	619	helpless	543	unwanted	531	miserable	457	rejected	311	surrounded	300	terrible	290	forgotten	280	worthless	269	emptiness	249	useless	246	suddenly	244
1131	lil	18306	man	8712	wayne	6230	drake	604	ft	589	bi	483	mans	479	dye	428	eminem	382	british	329	jail	272	reasons	263	carter	230	ultimate	224	sacrifice	205	rapper	173	selfish	120	remix	64	twat	53
1130	side	33995	bright	6854	dark	5189	blind	2290	sides	1549	effects	1027	flip	1001	moon	869	sunny	523	force	478	coin	394	brighter	362	opposite	324	effect	308	mysterious	255	darker	240	pillow	238	river	234	polish	220	cooler	214
1137	gay	15463	pride	6344	straight	2870	lesbian	1614	homo	1331	fag	1009	bi	774	parade	638	swallow	548	sharks	462	dolphins	430	marriage	327	admit	314	closet	301	folk	295	dudes	211	community	196	useless	195	raging	137	male	127
1136	i'm	33095	idiot	1555	beat	1551	argue	1298	level	1199	drag	881	lover	859	experience	745	sinner	542	hopeful	494	saint	478	wouldn't	400	tempted	327	joking	295	overwhelmed	272	midnight	268	grounded	257	practically	251	ashamed	249	arguing	222
1135	stuff	26919	bunch	2725	random	1936	alot	1829	cool	1457	crap	1202	rid	950	sort	908	ton	708	lots	581	putting	565	scary	530	liking	417	basically	406	throwing	391	happening	391	neat	360	kinds	358	including	347	sorts	316
1134	year	32450	happy	20096	hope	5161	wishing	3062	safe	3034	healthy	1910	prosperous	1274	ahead	1105	blessed	994	cheers	722	here's	609	peaceful	438	brings	438	successful	299	y'all	235	resolutions	174	joyful	171	beginnings	160	adventures	134	upcoming	113
614	jess	3732	cody	3262	jessica	2253	hanging	2167	alyssa	1813	simpson	1334	chilling	413	zach	352	hangin	301	lisa	301	troy	199	babysitting	165	bff	120	ross	102	maggie	73	suite	72
1277	guys	12787	pls	7323	hey	4439	thx	2789	ur	2342	asap	1050	btw	780	thnx	663	reply	543	suggest	500	inform	371	esp	345	peeps	311	msg	308	contact	299	comments	294	ps	273	ther	272	kindly	225	gals	215
519	knife	4642	cut	2811	sharp	2648	daily	2566	stab	2146	regular	1840	basis	1807	spoon	1533	sword	1511	blade	1288	razor	1064	fork	1059	knives	1018	stabbed	737	stick	574	plastic	573	cutting	482	dose	424	cuts	408	wooden	391
518	great	22753	night	13654	time	13443	awesome	1854	enjoyed	658	spending	631	wolf	391	ended	177	kiddos	60	gig	40
1009	birthday	28915	wishes	25597	messages	4351	guys	4090	wonderful	3995	lovely	3171	thankyou	2886	special	1610	bday	1342	appreciated	1111	xx	1019	cheers	673	presents	652	gifts	560	comments	503	b-day	497	cards	445	xxx	423	overwhelmed	383	thanking	376
1008	candy	12598	corn	2654	eating	2060	cotton	1763	eat	1756	bag	1280	halloween	1108	ate	1073	maze	963	popcorn	962	store	951	bar	860	bars	858	sweets	846	bought	639	sugar	572	sour	536	piece	533	skittles	440	craving	289
1007	today	9420	made	4931	awesome	2584	rice	2313	making	1323	treats	1147	equals	465	cakes	88
1006	job	19543	jobs	6342	working	3155	applied	1855	applying	1586	apply	1400	places	1097	hiring	1083	hire	630	quit	611	drug	523	paid	518	fired	495	interview	485	hired	477	require	473	testing	441	florida	393	resume	309	interviews	277
1005	de	10145	um	3758	para	2571	em	2563	se	2333	os	2001	mas	1471	por	1470	dia	1401	ser	1196	est	1194	ou	999	como	976	dos	832	vida	724	todos	709	ver	691	sem	660	es	657	nada	519
1004	care	12582	health	11007	sick	4100	broke	3058	rest	3024	agree	2755	die	2651	afford	2128	post	1634	insurance	1590	taking	1560	mental	947	bill	909	passed	741	urgent	580	medical	494	disagree	458	safety	449	issues	346	sickness	307
515	knew	19204	wanted	2835	loved	2787	felt	2609	needed	2468	cared	1451	told	1368	you'd	1314	happen	962	couldn't	852	apparently	816	lied	742	cried	607	gave	596	decided	570	died	520	shared	519	we'd	513	existed	478	pride	366
1002	angry	13778	upset	6507	sad	5119	mad	3141	frustrated	1492	birds	1441	pissed	1227	confused	1073	depressed	845	disappointed	623	annoyed	585	>:	485	extremely	427	lied	420	calm	206	irritated	205	dissapointed	149	everybody's	117	revenge	106	furious	102
1001	ear	6493	ears	5467	lip	4657	pierced	2888	nose	2689	piercing	1996	ring	1512	tongue	1252	ringing	970	bleeding	693	busted	681	pierce	618	deaf	481	ouch	479	wax	468	tattoo	424	upper	340	bite	335	smiling	324	belly	258
1000	ya	10655	catch	4390	i'd	3198	throw	1973	straight	1763	hand	1726	grenade	1526	brain	1216	jump	1143	train	1084	front	1078	id	857	blade	671	bullet	669	pin	359	trash	202	salt	195	whistle	162	infront	159	darling	147
1227	da	46155	dat	3791	dis	2977	wit	1661	wat	1373	den	1262	jus	806	mornin	784	wid	775	dats	566	skool	462	fone	397	eva	387	wats	323	ova	259	gud	258	fa	242	iz	240	der	216	waitin	212
622	cry	18426	make	17611	laugh	13386	smile	6512	makes	6183	tears	1690	happened	980	laughs	618	shoulder	580	crying	372	laughter	191	cope	48
1225	sarah	1519	marie	1456	emily	1350	nicole	1236	elizabeth	1088	katie	1047	taylor	962	lauren	958	johnson	958	ashley	913	smith	894	rachel	853	jessica	783	brittany	729	williams	698	amanda	688	jones	660	michelle	630	davis	605	megan	598
620	fun	29384	tons	4194	stuff	3780	lot	3335	loads	2704	lots	1814	ton	1294	hella	968	sounds	900	fu	836	tiring	146	lastnight	108	snowboarding	81	tops	65	sledding	63
627	listening	9320	music	5936	songs	3506	song	2410	beatles	2067	led	2047	listen	1979	rock	1870	elvis	1345	singing	1106	classic	1082	pop	726	cd	660	turned	570	bands	440	album	401	jamming	381	playlist	373	listened	373	rocking	366
626	hours	21458	spent	15499	half	8303	hour	5151	minutes	2659	entire	1911	past	1313	wasted	978	couple	739	afternoon	589	literally	518	total	509	managed	396	er	273	countless	203	practically	134	realised	114	twelve	113	solid	105	fixing	103
625	i'm	17885	surprised	4730	didn't	2425	pretty	1865	disappointed	1822	shocked	1787	impressed	1766	pleased	1717	amazed	1665	wasn't	810	thrilled	696	suprised	626	fact	619	extremely	568	honestly	533	convinced	506	announce	409	shouldn't	335	you'd	315	constantly	295
1220	awsome	10345	amazing	6042	yesterday	1901	amazin	1248	freakin	677	freaking	491	absolutly	413	comming	191	finaly	110	chilled	97	jade	56
629	haha	24947	hah	6041	wow	4254	hahaha	2369	hahah	1250	;	854	joke	820	hilarious	595	kidding	562	weird	539	lmao	458	gosh	293	tho	223	umm	181	woah	148	jeez	144	retard	123	funniest	117	lik	106	ummm	93
628	lo	5083	fight	2036	haha	1683	hah	1438	chop	1300	boxing	852	hahaha	781	odds	747	hahah	690	round	675	beat	658	woohoo	621	ftw	596	bet	570	handy	558	hahahaha	426	philippines	413	slap	360	wins	308	hahahahaha	289
1229	book	20212	reading	19139	read	10112	finished	7576	books	3771	series	2433	finish	1975	started	1262	chapter	915	writing	879	twilight	630	report	549	manga	541	pages	511	ending	416	chapters	415	comic	386	finishing	385	recommend	297	library	291
1228	nice	9764	relaxing	6488	weekend	5317	home	5261	enjoying	3255	rest	2006	needed	1591	chilling	1222	chill	678	relaxation	601	chilled	529	pool	520	ahhh	510	relaxed	501	relax	411	catching	404	hubby	317	resting	296	ahhhh	212	deserved	151
2	hate	16269	haters	5102	hating	2949	jealous	2395	hater	1705	bitches	1198	mad	908	hated	847	hatin	815	jealousy	532	famous	375	lovers	345	ya'll	192	envy	179	phase	159	ruin	156	secretly	95	hotter	76	specially	68	colder	47
1286	thinking	30116	bout	3341	stop	2506	thoughts	1977	remember	1152	lonely	679	finds	599	changing	584	conclusion	463	presence	404	thinkin	383	buying	327	critical	293	joining	292	worthwhile	258	shouldn't	217	dreaming	216	abt	201	constantly	184	alike	183
11	hour	18542	shift	8779	half	4666	hr	4428	delay	3404	hours	3393	shifts	1665	worked	1383	extra	949	hrs	480	twelve	368	workin	282	split	234	overtime	155	closing	143	scheduled	77	pooped	66	eleven	62	overnight	55
10	mr	30106	mrs	7696	ms	1832	fantastic	927	smith	628	bean	605	fox	474	rogers	450	aka	295	congratulations	285	president	264	robinson	214	anderson	210	jones	197	mister	170	wilson	99	potato	97	clark	96	parker	86	moore	84
13	back	24271	bring	7324	memories	5723	brings	4469	brought	3737	bringing	2585	bounce	1822	fond	291	childhood	244	flooding	112	nostalgia	74	rushing	72	nostalgic	45
12	lee	7846	bruce	3196	tommy	1938	leo	1791	evans	958	le	814	campbell	740	amy	678	jamie	365	smith	333	mrs	310	cliff	250	jessica	225	jones	219	ann	214	jordan	208	lewis	200	sara	194	aka	188	crystal	185
15	sleep	28737	hours	7871	night	7869	tired	3741	wake	2732	nights	2288	bed	1815	couldn't	1209	woke	1202	waking	801	nightmares	779	decent	693	restless	608	night's	583	exhausted	570	nap	545	couldnt	534	awake	454	woken	394	peaceful	225
14	graduation	6482	proud	5393	congrats	4558	congratulations	3534	class	3263	college	3149	graduate	2468	graduating	2461	graduated	1856	degree	1560	officially	1518	graduates	1391	seniors	1274	batch	1046	grad	817	students	758	ceremony	731	grade	674	highschool	629	fellow	593
17	happy	23945	diwali	4494	wishing	3207	holi	1872	enjoy	1243	safe	1116	al	1062	prosperous	787	festival	769	frnds	470	advance	330	wishin	323	evry	278	cheers	260	colours	240	crackers	224	colors	221	celebration	204	b'day	168	sweets	166
16	back	33412	grind	3965	whip	3280	hair	2445	track	1682	laid	1430	daily	1030	groove	868	bump	467	smith	319	shape	268	fort	223	slam	161	grin	159	pat	117	hustle	68	weekly	45	whipped	43
19	i'm	24360	thinking	17492	wondering	3887	sitting	3644	starting	1462	missing	663	heck	454	putting	319	contemplating	238	staring	218	pondering	17
18	thankful	16341	family	14986	happy	14462	thanksgiving	14392	friends	12069	wonderful	3732	blessed	1801	safe	1618	enjoy	1431	holiday	1358	grateful	1043	blessings	727	wishing	695	turkey	558	holidays	409	healthy	384	families	382	health	352	greatful	133	extended	112
201	people	10575	kill	4455	means	2333	remember	2162	guns	2143	person	2084	calling	1828	words	1808	chose	1788	drunk	1691	offer	1535	drive	1386	hold	1353	cars	1330	fat	1120	gun	1043	tragedy	1029	light	905	laws	873	actions	840
200	awesome	29142	freaking	4405	pretty	3446	awesomeness	1965	terry	935	freakin	827	pure	749	amazingly	662	epic	589	flippin	430	dude	409	ridiculously	287	insanely	227	awesomely	126	transformers	124	zombieland	85	fricken	70	uber	56
203	final	18501	fantasy	4329	destination	1344	grand	771	countdown	682	boss	584	semi	581	ps	540	temporary	536	factory	513	score	491	belong	363	stretch	316	rooms	299	passing	283	chapter	248	twisted	241	windows	233	iv	226	core	222
202	mi	10691	dem	3958	ah	2655	fi	1921	di	1436	jus	1209	nah	948	dis	904	wid	843	dat	828	ting	813	meh	780	wah	758	kno	742	wi	607	yah	577	gal	563	wen	544	dey	447	boi	414
205	head	18039	smack	5217	upside	5081	hit	3095	bat	2896	baseball	1250	deserves	742	someones	655	slap	635	someone's	476	outta	442	cave	432	smashed	432	messing	413	toe	279	puppy	267	shovel	186	grab	170	flipped	169	plate	166
204	lake	14759	boat	5590	river	2907	salt	2597	water	1701	fishing	1206	city	1097	swimming	1052	headed	618	michigan	613	blast	594	fireworks	417	camping	385	skiing	366	tube	323	float	297	floating	293	crystal	270	jet	262	swim	260
207	bomb	9824	da	5844	drop	1334	bombs	1209	threat	837	blow	790	dropped	693	explode	509	blast	467	dropping	464	cherry	462	scare	441	ultimate	318	code	202	explosion	200	exploded	190	inception	176	nuclear	165	hella	163	stink	131
206	nigga	6921	aint	3621	ya	3297	wit	3296	niggas	2567	yo	2209	gucci	1757	bitch	1645	shawty	1468	tha	1040	yall	1023	gon	1023	tryna	985	em	974	ain't	905	ima	888	hood	754	homie	716	imma	709	gangsta	664
209	dream	28218	woke	3792	weird	2383	dreamed	1295	teenage	1288	weirdest	1212	dreamt	1169	disappointed	1008	catch	981	nightmare	979	dreams	968	throw	829	discover	822	safe	770	explore	706	trade	645	strange	565	twenty	557	night's	515	winds	509
208	york	8410	city	4366	ny	4279	nyc	2793	streets	1653	carl	1556	putting	699	jungle	640	lights	540	boston	495	brand	491	complete	477	concrete	474	chicago	415	inspire	382	ground	381	square	359	ft	355	fallen	310	heroes	305
1573	shit	11718	damn	4661	ass	2749	fuk	2565	hell	2381	wtf	2162	fuck	2074	dam	1559	fuckin	1094	bitch	979	pissed	936	aint	925	hella	842	dumb	704	piss	600	lmao	574	bitches	449	ima	416	outa	351	lmfao	349
1572	amazing	7621	absolutely	5809	highly	5483	recommend	3035	incredible	1877	loved	1130	brilliant	1102	blessed	997	doubt	871	fantastic	831	awe	747	recommended	740	inspiring	678	incredibly	650	suggest	566	simply	527	truely	514	unbelievable	511	hilarious	462	definately	431
1571	hate	14482	sick	11925	:	4484	sucks	3973	spam	2508	ugh	2235	ughh	1840	ughhh	1373	bein	908	grrr	659	ughhhh	649	sux	448	ruins	386	gah	208	:	185	>_<	118	#N/A	86	uhh	85	spa	50	booo	46
1570	uncle	9726	aunt	9212	cousin	2988	auntie	1722	grandma	1252	linda	1135	visit	998	aunty	900	rip	824	cousins	751	mike	669	sue	549	karen	474	carol	474	visiting	443	lisa	422	nancy	366	sandy	359	jim	353	pat	343
1577	internet	21460	connection	5320	cable	2451	wireless	2189	net	2183	computer	1724	slow	1719	laptop	1619	access	1564	connect	1421	wifi	1318	online	1028	connected	963	speed	807	mobile	690	signal	675	network	593	download	588	fix	583	service	563
1576	back	16987	home	14483	glad	7669	missed	7029	sooo	765	pat	183	dudes	117	wagon	74	sooooooooooo	66	lining	40
1575	watching	12744	spongebob	3614	patrick	1574	watchin	1484	shows	964	cartoons	926	entertaining	701	tunes	587	marathon	545	sandy	467	doug	335	nick	249	nonsense	158	scaring	148	nostalgia	113	deck	102	arnold	73	formula	49	favorites	43	represent	36
1574	bleh	4304	bored	3367	eff	2673	damn	2465	sigh	2416	ugh	2238	freaking	1886	gah	1767	effing	1510	sucks	1453	-_-	1129	>_<	947	x_x	883	>.<	818	headache	571	o_o	451	effin	412	soooooo	410	#N/A	352	d:	301
1829	youu	3651	thee	2228	mee	2028	soo	1747	lovee	1715	dayy	1502	:	1485	upp	962	todayy	910	funn	711	ii	617	ohh	468	ughh	406	wayy	391	hmu	336	bee	325	yeahh	278	mann	248	inn	232	youuu	212
1828	earth	15023	heaven	5895	greatest	3830	place	3313	give	2713	face	2019	glory	1182	hug	746	happiest	732	rising	706	falling	632	blessings	461	heavens	429	recognition	401	parent	343	god's	276	lift	264	created	233	treasure	231	maker	224
1825	joke	11219	funny	9474	jokes	5555	laugh	5256	inside	3140	laughing	2225	hilarious	1050	hahaha	892	lmao	805	laughs	798	cracking	678	telling	620	clown	462	funniest	441	joking	427	crack	377	laughed	357	cracked	328	laughter	248	humor	226
1824	friday	14855	glad	10678	it's	7837	weekend	7176	week	6112	finally	4250	soooo	840	sooooo	596	sooo	579	longest	327	tomorrow's	309	woohoo	190	soooooo	181	tomorrows	98	motor	38	looong	36	dragged	30
1827	early	15666	morning	13659	waking	8360	wake	5221	bed	4254	sleep	4081	late	2332	sleeping	1713	mornings	1543	awake	1454	earlier	876	noon	654	earl	388	08:00:00 AM	273	wakes	247	o'clock	205	sunrise	204	woken	190	yawn	138	routine	120
1826	lord	10636	god	8451	pray	8298	father	5130	jesus	5071	amen	4233	dear	3416	prayer	2879	heavenly	2052	protect	1508	guide	1484	strength	1438	worries	1421	bless	1380	powerful	1271	heal	1162	set	1140	praying	1028	guidance	826	continue	726
1821	north	12563	south	7253	carolina	5103	korea	3953	dakota	2297	heading	1564	florida	1087	korean	991	beach	985	avenue	876	pole	776	headed	732	america	495	georgia	402	bound	305	ave	276	campus	260	east	241	portugal	214	miami	211
1820	beach	27130	sand	5753	sun	2221	water	1550	waves	1507	ocean	1490	surf	1242	sea	1235	toes	703	sandy	675	surfing	657	beaches	651	sunset	618	florida	562	virginia	451	palm	450	va	417	headed	380	volleyball	332	miami	304
1823	finish	14134	start	10733	gotta	5825	homework	2513	started	2127	packing	2032	waiting	1382	stuff	1276	hw	747	essay	565	sentence	527	hurry	456	laundry	424	finishing	423	motivated	384	determined	368	painting	314	asap	177	projects	102	unpacking	92
1822	red	11050	blue	7646	roses	5458	dead	3552	redemption	1395	white	1308	rose	1246	dozen	1045	guns	844	devils	562	velvet	554	burns	484	august	454	flowers	376	pill	357	yellow	330	poem	258	dime	236	balloons	207	courtesy	189
928	bread	7772	banana	6178	making	3944	muffin	1842	muffins	1772	blueberry	1650	ginger	1152	split	1064	pancakes	1020	pudding	867	baking	815	nut	602	cupcakes	484	yummy	462	bananas	457	oven	455	strawberry	423	smells	386	fresh	379	makin	370
929	dream	21430	reality	7413	dreams	6784	wake	5889	dreaming	3947	real	2407	TRUE	2343	nightmare	1519	vision	1267	living	1196	imagination	979	waking	775	fantasy	775	realize	743	thoughts	569	dreamer	500	nightmares	469	action	424	signs	326	reject	307
920	queen	7156	keith	3014	drag	2629	drama	1568	prom	1137	dairy	1076	urban	1071	homecoming	912	blizzard	592	king	563	damned	427	vote	402	queens	351	scene	288	mac	231	victoria	204	elizabeth	176	sweat	139	procrastination	137	legend	125
921	day	20689	great	19408	today	7902	hope	4029	yesterday	1749	fantastic	1083	mist	18
922	david	15562	cameron	2409	logan	238	allen	214	larry	172	craig	128	dave	121	foster	117	jonathan	75	twat	31
923	great	12922	job	8091	guys	5427	amazing	4565	crew	3517	awesome	3302	show	2807	cast	2607	proud	2041	congrats	1374	fantastic	1241	performance	1233	excellent	961	rocked	642	congratulations	535	kudos	516	opening	513	involved	474	outstanding	333	incredible	329
924	eat	9340	meat	5102	bone	2600	vegetarian	1291	eating	1100	eats	863	raw	704	animals	639	animal	517	pudding	358	flesh	352	bones	322	tasty	267	clown	249	beef	237	crackers	233	steak	200	plants	187	subway	177	poop	172
925	lol	20319	lo	7317	tho	6501	fun	4108	gotta	3579	damn	2293	guess	1802	gots	1077	messing	236	welp	207	dang	167	prob	165	couldnt	141	tooo	116	awwww	114	startin	59	alexis	35	mines	32
926	simon	2497	nathan	2414	lucy	2171	blake	2120	jenny	2107	baker	841	misses	447	griffin	378	killed	299	heather	279	aka	190	mitchell	153	brilliant	152	kelsey	137	tommy	136	where's	122	jen	105	neil	100	nate	100	lucas	98
927	work	14078	boss	10704	job	5597	working	2143	office	1809	fired	1438	manager	1380	told	1217	company	848	meeting	784	customers	700	employee	596	employees	487	worked	451	paid	416	client	398	staff	388	workers	386	quit	360	shift	356
1920	supposed	15229	part	2337	aren't	1780	they're	1780	we're	1349	suppose	1088	apparently	1030	permanent	1027	temporary	1013	choked	715	heck	457	excitement	411	madness	398	life's	397	discover	371	convince	370	arent	296	challenges	288	roots	257	decision	237
1921	place	6939	miss	5674	heaven	3193	hold	2770	pick	2740	turns	2331	bunch	2237	smile	2109	arms	2093	grow	2029	kiss	1971	they're	1876	everyday	1631	lord	1593	dad	1481	cheek	1383	there's	1268	easy	1216	remembering	1154	awhile	1147
1922	<3	22945	:d	11451	:	9984	;	3361	amazing	2768	xx	2046	:p	1555	:'	1182	xxx	992	xxxx	712	;d	482	thankyou	307	jess	294	xxxxx	223	lovee	208	babes	182	xxxxxx	123	aha	116	alll	112	sleepover	112
1923	warning	5349	tornado	3781	bam	2454	backwards	1716	stressed	1509	weather	1307	label	1164	storm	904	flood	875	thunderstorm	815	dangerous	755	caution	749	severe	720	beware	655	sign	595	storms	543	thunderstorms	491	spelled	469	basement	462	area	446
1924	im	33332	goin	5115	tired	4185	rite	2638	pissed	2290	feelin	1511	idk	1225	gettin	420	confused	409	wont	401	tho	320	dam	284	hype	68	sleepin	67	diff	21
1925	ooo	45290	oo	6051	ooh	4521	ps	1909	ohhh	892	ohhhh	736	ohhhhh	452	ohh	441	nooo	139	snap	116	noooo	93	shiny	90	yeahh	60	nooooo	59	lala	57	noooooo	50	yeahhh	47
1926	pm	11299	free	3093	saturday	2808	tickets	2747	center	2308	event	2077	interested	1551	march	1419	st	1416	join	1261	contact	1180	sunday	1097	info	1094	support	968	sat	954	feb	891	hall	851	april	811	thursday	810	students	781
1927	test	16104	exam	6540	math	6481	studying	5771	final	5310	study	4314	quiz	3988	midterm	2392	class	2340	chem	1957	spanish	1802	fail	1592	history	1385	grade	1332	bio	1280	chemistry	1207	physics	1199	studied	1061	failed	1012	stats	986
1928	ideas	11712	suggestions	6603	thinking	3238	idea	3077	appreciated	3055	greatly	2071	advice	1189	creative	1142	suggestion	852	figure	689	helpful	686	tips	667	decide	636	preferably	576	opinions	542	names	521	comments	521	suggest	450	planning	445	places	419
1929	pay	6456	save	2524	starting	2404	money	2402	dear	2185	lets	1927	continue	1866	hear	1864	mr	1859	country	1580	lives	1525	freeze	1499	cut	1404	cutting	1380	benefits	1092	risk	1086	president	1065	increase	852	risks	813	agree	806
832	killed	3738	bring	2801	kill	2676	death	2633	empire	2616	won't	2181	rebel	2039	star	1798	innocent	1745	continues	1737	related	1646	understand	1643	peace	1591	scum	1262	band	1208	galaxy	1135	continue	732	evil	627	vomit	284	destroyed	274
833	days	26721	countdown	5885	till	5216	begins	5137	count	3268	left	2604	begin	1508	starts	1172	counting	1145	begun	1001	untill	950	continues	551	graduation	323	remaining	141	excitement	127	dayz	61	commence	45
830	follow	15335	twitter	11627	tumblr	2011	leader	1266	rt	880	lead	577	crowd	446	account	403	joined	392	blog	385	trend	357	advice	315	updates	277	leaders	231	instructions	217	shortly	189	suit	173	topic	143	capacity	139	updating	102
831	good	25131	morning	22370	fb	2551	mornin	1914	woke	950	coffee	880	peeps	571	earth	429	sunshine	419	waking	417	gooood	389	goooood	383	facebookers	379	workout	317	goood	300	goodmorning	269	chilly	35
836	friday	26980	it's	9122	weekend	3744	thursday	2549	yay	2248	goodness	1290	payday	1255	woohoo	952	tomorrows	794	tgif	690	fridays	577	hurry	388	tomorrow's	346	freaky	282	yippee	232	hooray	187	wooohooo	148	everybody's	102	foward	89	yessss	76
837	love	26493	rose	6886	beautiful	1997	loves	1779	dies	483	emily	305	draw	227	defense	222	flower	202	calm	197	concrete	197	grew	191	chose	145	roses	127	prick	94	compare	93	leaf	85	sings	80	cowboy	74	daisy	68
834	glee	11767	episode	8335	watching	8270	watch	4891	watched	2825	episodes	2110	season	1637	sue	1114	marathon	803	scrubs	790	series	784	csi	759	ep	538	catching	449	bones	437	latest	383	week's	377	kurt	365	tonight's	355	supernatural	347
835	love	60445	loved	2814	truely	571	freely	123	shown	118	dearly	108
838	da	3576	mi	3347	wit	2356	dnt	1729	meh	1491	bout	1428	sum	1354	tha	1278	bt	1196	dis	1185	dat	1181	wat	1157	iz	1081	wen	1070	ta	985	jus	950	aint	864	kno	848	ima	830	gud	813
839	river	6037	flow	2733	nuff	2567	mine	1136	rescue	711	flows	656	trapped	655	baba	527	flowing	473	heavens	451	rivers	443	chile	382	floating	362	gently	357	dirty	352	gate	330	grin	329	faces	309	drowned	281	underground	276
3	wanna	14770	hang	12140	text	8987	bored	8702	call	5927	talk	3458	chill	1953	txt	1911	plans	1458	hangout	943	somethin	901	ou	895	idk	647	wana	442	hmu	297	han	175	lemme	145	gimme	117	ahold	114	needa	87
784	sa	34860	na	17414	ng	15375	ko	14953	mga	11517	po	9715	ako	5975	lahat	5750	ang	5578	salamat	4800	nyo	3843	lang	3811	kayo	3338	pa	2895	ung	2755	yung	2574	ni	2175	naman	2087	sana	1819	para	1779
785	god	19016	lord	14029	praise	8616	jesus	6265	glory	5524	worship	2389	christ	1582	blessed	1403	worthy	1329	mighty	1283	holy	1235	savior	1181	hallelujah	1019	father	1009	amen	1007	spirit	989	grace	987	presence	916	king	914	lift	884
786	bowling	10558	tonight	9722	fun	8245	alley	1421	ally	1217	blast	702	wii	544	midnight	387	bowl	329	strike	310	strikes	308	pin	292	league	284	tournament	128	bingo	71	glow	58
787	death	24160	die	4107	dies	1497	died	1202	painful	958	dying	931	loss	887	slow	852	cab	667	funeral	569	greatest	520	alive	517	immortal	482	horrible	455	mourning	427	cutie	426	birth	368	freeze	343	eternal	343	grave	330
780	d	17551	p	5579	=	4715	=	1206	#N/A	763	=	728	dd	443	^_^	304	btw	260	o.o	225	xo	191	xp	165	^.^	143	'	123	=	107	ddd	106	yayyyy	102	atm	100	=	95	yaaay	85
781	heard	5719	don	5139	forget	3983	put	3672	important	3196	hearts	2975	message	2381	spread	1631	copy	1410	sake	1349	crap	1255	ve	928	text	788	goodness	764	no-one	236	fucks	157	pete	117	approach	62	ck	45	heavens	23
782	end	4037	means	3312	that's	2830	winston	1644	matters	1172	stood	1024	mine	998	enemies	598	sir	487	sink	292	toys	273	dishes	193	intend	151	fails	150	halfway	103	function	81	petty	51	nancy	47
783	hour	4036	daylight	2832	extra	2501	savings	1659	set	1069	clocks	1012	saving	728	ahead	607	earlier	485	clock	240	reasonable	170	maine	166	adjust	92	standard	64	sunlight	38
1726	rainbow	4049	robot	2797	unicorn	2563	taste	2291	dale	1845	skittles	1763	pony	1564	rainbows	1500	attack	1095	poop	1044	butterflies	985	gold	845	throw	744	magical	679	tail	630	glitter	577	pot	539	throwing	473	purple	409	moves	380
1727	smile	17994	make	12488	makes	11501	laugh	6929	takes	2710	cry	2116	giggle	1607	everytime	1586	frown	1454	muscles	1028	style	720	extend	547	arm	496	annoys	430	smiling	360	kills	311	fails	275	sets	257	melt	250	sight	244
1724	ben	11321	big	2666	thinks	1398	hah	1013	possibly	647	jerry	434	parties	223	raped	155	franklin	147	icecream	105	jamie	95	reaching	91	davis	89	pint	88	tub	84	bailey	77	suspended	63	sailor	46	foster	44	cone	38
1725	family	12702	friends	11842	wonderful	11185	blessed	9042	amazing	5932	thankful	5111	loving	3229	husband	2848	grateful	2529	lucky	2219	boyfriend	1124	truely	1085	supportive	830	daughter	602	helped	567	greatful	496	surrounded	463	fortunate	449	caring	412	incredible	390
788	yum	10249	dinner	4354	crab	2471	rice	2387	curry	2255	chicken	2168	shrimp	2071	eating	2065	yummy	2052	lunch	1778	sushi	1409	ate	1212	cooking	997	fish	995	fry	958	fried	891	steak	649	delicious	625	cook	577	craving	568
789	eid	5193	mubarak	3952	egypt	2185	al	1311	grand	1192	auto	745	wishing	680	allah	384	revolution	357	jordan	330	muslim	326	advance	246	miserable	206	muslims	195	peaceful	182	identity	157	iraq	126	impressive	118	pakistan	117	protest	116
1720	toast	4775	pancakes	4275	french	4225	breakfast	3990	making	2912	pancake	2385	waffles	2048	crunch	1961	cinnamon	1699	ihop	1690	rolls	1517	eating	1200	mix	968	syrup	885	toaster	845	waffle	563	mmm	532	blueberry	506	yummy	412	makin	404
1721	good	18846	bad	17496	thing	7003	company	2975	idea	1824	isnt	1759	combination	743	intentions	742	combo	527	perfectly	419	misunderstood	171	necessarily	82	guarantee	66
60	heart	12077	hear	6014	eyes	5379	listen	4371	hold	3202	words	3142	ears	3072	find	3025	speak	2685	hands	2652	mind	2471	walk	2167	soul	1802	voice	1615	legs	1353	mouth	1268	touch	1056	ear	1031	truth	964	speaks	962
61	hair	27488	blonde	7088	dye	4751	red	4324	color	3902	black	3231	brown	3214	dying	2774	purple	2580	dyed	2447	dark	2153	blue	1681	blond	1544	colour	1491	pink	1411	highlights	1165	cut	1157	natural	746	darker	539	bleach	525
62	read	23145	book	16259	reading	5538	pages	4248	chapter	3480	books	3259	written	1658	page	1628	article	1590	notes	1422	chapters	1338	write	1122	story	1014	history	684	newspaper	642	review	639	wrote	543	cover	522	articles	496	bible	450
63	tomorrow	23735	school	10047	day	8298	forward	8010	starting	1782	meeting	867	exciting	821	hopes	313	dread	181	returning	112	yikes	79	grin	44	chin	28
64	ft	6273	hood	4560	fort	3844	robin	3396	slip	2358	slide	1857	batman	1782	worth	1635	joker	703	tall	407	collins	400	boyz	333	wayne	272	lewis	267	rat	194	dallas	190	smith	188	wood	156	fl	154	william	141
65	day	15314	everyday	11240	closer	6493	missing	1883	easier	1018	lived	650	brings	386	passes	349	reminded	157	routine	154	wil	116	ordinary	111	notebook	37	creeping	30
66	cold	30407	freezing	5141	winter	4269	weather	3958	snow	2639	warm	2621	degrees	1782	frozen	1603	freeze	883	colder	877	heat	800	ice	788	wind	719	warmer	659	toes	591	heater	585	wet	542	chilly	533	froze	495	bloody	468
67	drive	11389	golden	4526	crazy	3671	flash	2182	devil	1740	insane	1716	wears	1022	gate	714	aren't	369	gucci	302	hr	282	backs	277	sunset	253	bridge	248	wanting	207	remedy	169	legally	152	nada	89	sorta	46	collapse	21
68	:	58548	missing	877	missin	399	gutted	310	depressed	275	nooooo	155	nooo	132	poorly	123	bummer	109	noooo	95	depressing	95	dissapointed	54
69	friends	12270	long	11032	yesterday	4938	friendship	4749	pick	4488	question	4359	spoke	4163	live	3934	speaking	3891	hold	3268	periods	3134	understand	3004	TRUE	2908	busy	2855	types	2544	grudges	1805	lucky	1587	everlasting	1468	re-post	1348	repost	1017
1371	road	19223	cross	6015	country	4971	roads	2084	side	1299	straight	1084	travel	890	path	872	construction	869	traveled	795	led	640	chickens	622	ahead	616	success	534	lead	523	leads	519	dirt	441	rocky	433	paths	422	yellow	415
1588	extra	10148	soldier	2049	credit	2047	class	1793	months	1596	enjoys	1433	everyday	1350	flies	999	country	898	sees	868	promise	829	support	775	reduced	756	defend	716	justify	709	points	576	longer	530	exciting	485	account	410	ordinary	373
1589	math	8283	physics	2939	class	2379	homework	2265	calculus	1423	algebra	1252	test	1214	problems	1052	maths	892	problem	758	tutor	745	science	714	teacher	701	chemistry	620	add	615	statistics	580	numbers	504	function	441	formula	407	quiz	387
1370	pretty	14728	feel	6565	perfect	3487	swag	1929	turned	628	unreal	625	confident	619	imagine	573	ideas	509	powerful	226	tis	201	legend	190	napping	184	fragile	164	wood	116	beliefs	111	curious	91	gently	89	weary	62	kin	60
1582	speed	8660	faster	4401	fast	3487	limit	3025	slow	2779	light	1310	running	1061	drive	1046	moving	966	travel	769	lane	757	mph	756	slower	561	ahead	557	reached	524	chase	498	passing	490	thrill	361	travels	331	process	259
1583	run	37629	fast	2321	errands	1434	running	837	faster	821	town	750	track	598	mile	570	runs	460	hide	403	race	360	cover	295	devil	272	chase	265	walmart	223	dry	214	they'll	209	gun	205	tracks	188	hills	178
1580	flight	12177	airport	9048	plane	3661	waiting	3553	delayed	2119	booked	1839	flights	1836	cancelled	1075	flying	989	board	946	chicago	868	fly	808	boarding	738	london	695	landed	670	atlanta	658	international	611	denver	595	seattle	543	travel	512
1581	force	4123	switch	2495	full	2453	:x	1918	turn	1862	decided	637	forcing	605	fed	495	control	484	forced	471	suddenly	422	powerful	324	it'll	242	capable	132	assuming	105	switched	82	flick	74	movement	71	muse	66	flipped	62
1586	naked	4461	dancing	2988	tap	2851	pole	2525	drunk	1954	dance	1571	dancer	1156	corner	875	strip	846	club	696	lmao	556	dressed	451	dances	368	hottest	331	tease	322	hahahahah	300	dancin	284	telephone	259	revenge	258	imagine	254
1373	aint	17301	nothin	7607	shit	3911	cuz	2667	doin	2107	gotta	1842	somethin	1807	ain't	1797	gon	1438	bout	1368	trippin	883	bitch	866	workin	863	thang	702	gettin	696	tryin	651	tryna	651	sayin	459	ima	407	movin	372
1584	finally	17234	yay	7147	haircut	3296	arrived	1725	months	1375	woohoo	906	sorted	739	gots	648	yayy	645	yaaay	568	phew	465	cleared	402	yesss	344	yayyyy	343	laptop	307	woohooo	306	settled	286	relieved	268	wooohooo	263	permit	238
1585	xa	174356
1038	call	37813	duty	8750	jury	2153	calls	439	cops	347	backs	324	booty	291	excuse	240	anytime	229	staff	225	conference	198	saint	183	cal	158	sinner	119	gangster	109	tx	103	trial	92	geek	74	they'd	64	shortly	54
1372	made	4182	started	2381	doesn't	2135	bra	1898	susan	1470	clear	1386	ladies	1031	white	989	blue	960	pink	904	news	733	breast	696	foundation	669	colors	631	raise	605	color	556	printed	508	awareness	432	spread	302	channel	259
508	world	29356	live	4123	small	865	entire	825	mine	754	exist	679	jealous	530	ruled	528	gandhi	518	wide	436	bunch	370	doubt	322	expectations	316	helped	294	unlike	269	countries	216	greatness	190	capacity	186	harmony	183	conquer	181
509	video	15427	youtube	8932	videos	7800	music	5156	watching	4485	watch	4368	check	2360	watched	1606	vid	1544	posted	1085	upload	936	editing	841	tube	667	clip	583	uploading	512	hilarious	502	channel	474	funniest	472	posting	412	uploaded	408
1032	day	19126	great	13722	today	10793	yesterday	2762	hope	2438	nice	1440	^.^	659
507	bag	11944	gum	3583	trash	3578	garbage	3004	bags	2843	plastic	2779	douche	2402	chewing	1219	piece	1158	chew	1119	punching	965	bubble	947	throw	938	cans	775	threw	749	pack	495	bin	456	chips	409	rubbish	399	dump	354
504	rest	23713	peace	20160	missed	1478	soul	1359	yo	1086	passed	649	laid	524	uncle	421	forgotten	398	ou	351	grandma	331	hearts	324	grandpa	323	resting	319	souls	258	eternal	227	beloved	208	paradise	204	remembered	147	screwing	133
505	early	10156	morning	8551	woke	7792	sleep	6948	bed	5814	night	5261	late	5113	mornin	2365	awake	868	ugh	780	wake	548	yawn	532	caught	450	sleepin	405	sleepy	399	nap	338	midnight	337	couldnt	304	morn	258	earl	170
502	lo	7717	gary	3996	dennis	1751	rip	1201	died	726	reminds	311	moore	190	legend	103	glitter	92
503	na	13567	ka	9912	mo	6752	ko	6608	ako	6466	ba	5740	ang	4861	sa	4732	si	4036	naman	3970	pa	3950	lang	3543	ng	3503	nga	2876	yan	2763	eh	2584	ni	2448	hahaha	2349	di	2143	daw	1811
500	time	35084	spend	16074	spent	1714	coin	359	waste	310	sue	278	deciding	273	wisely	250	worrying	228	amount	204	priceless	180	volunteering	154	invest	150	flaws	107	opposite	102	wasting	88	determine	86	ages	83	possess	72	valuable	48
402	afraid	16768	walk	1965	stand	1614	character	1255	lose	1241	we'll	1174	hand	1168	reputation	1157	road	1107	arms	940	storm	878	bear	776	concerned	679	dark	639	warm	638	losing	586	heights	535	court	499	holla	492	individual	483
630	sense	21219	makes	10097	make	8501	common	8171	humor	3788	senses	418	reminding	390	confusion	365	someday	362	sixth	355	courtesy	350	agrees	307	nonsense	285	accomplishment	248	lack	245	logic	230	rare	181	FALSE	177	sarcasm	149	whatsoever	143
631	days	30456	til	16372	counting	3401	left	2539	weeks	2073	vacation	849	graduation	594	sleeps	497	bday	368	minus	352	xmas	277	florida	251	woohoo	192	b-day	191	cali	161	dayz	146	countdown	130	arrives	90	woohooo	65	cruise	59
632	it's	45851	official	7726	bittersweet	235	rhyme	194	dawn	144	begun	102	whistle	91
633	wrestling	2698	raw	2654	shawn	1688	match	1295	john	796	royal	416	randy	416	champ	373	austin	368	champion	309	cm	297	jeff	294	arena	279	triple	270	signing	234	punk	216	matches	211	steve	206	impact	205	title	205
1216	won't	23858	i'll	10884	don't	6295	leave	4062	give	4012	promise	2291	forget	880	hold	731	it'll	453	regret	402	alright	361	swear	312	they'll	297	guarantee	223	anytime	196	sooner	163	someone's	131	presence	119	childish	91	cave	90
401	late	24798	night	15434	stay	4238	staying	2434	nights	2347	early	2297	sleeping	1027	waking	262	mornings	254	goodness	210	usual	194	snack	166	arrival	153	stayin	141	talks	115	sunrise	85	arriving	80	trips	71	sessions	68	rushing	47
636	ability	2102	character	2074	knowledge	1753	act	1587	one's	1414	power	1232	strength	1109	confidence	1061	habit	1016	lack	1015	courage	1013	wisdom	1010	integrity	982	intelligence	926	greater	844	excellence	815	passion	794	faith	779	kindness	761	sacrifice	754
637	thinks	14086	lo	2885	austin	2178	wonders	1449	powers	1411	ridiculous	802	overrated	646	definately	602	hopes	459	hilarious	354	kenny	243	agrees	127	magical	114	pointless	99	combined	99	invention	91	spy	64	toooo	46	electricity	34	practically	34
638	TRUE	19019	it's	9826	we've	2969	FALSE	2338	missing	2025	lose	1713	colors	1568	arrives	1187	meaning	864	statement	635	act	574	remain	479	rumors	448	colours	311	tru	308	showing	248	settle	181	waited	134	mate	130	relatives	122
639	christmas	56426	merry	30852	eve	9458	xmas	2619	santa	1005	carol	810	x-mas	417	stole	286	nightmare	274
1218	can't	30786	wait	24316	tomorrow	4887	till	2134	girlies	33
1219	festival	9350	fest	6097	arts	2507	film	1266	jazz	1152	folk	1139	blues	598	international	404	greek	397	october	337	harvest	323	performing	313	craft	297	italian	249	booth	247	glitter	246	annual	222	irish	220	volunteering	201	downtown	187
1728	failed	6554	attempt	4108	thomas	3688	fail	2669	failing	2299	attempts	1084	attempting	1044	fails	948	ways	703	attempted	507	successful	373	horribly	343	exercise	334	managed	310	badly	310	failure	309	succeed	303	teen	257	jefferson	254	force	250
1729	insane	12415	crazy	8917	driving	2764	sane	1958	sanity	1731	completely	1625	insanity	1097	psycho	1002	madness	813	brain	732	normal	577	drives	521	nuts	362	driven	308	literally	261	slightly	238	clown	225	drivin	224	mental	212	insanely	192
1454	real	17300	fake	13420	act	786	pretend	664	pretending	518	aren't	439	tan	368	genuine	359	plastic	332	bitches	304	acting	301	honest	281	smiles	257	lying	250	claim	239	hiding	135	arent	94	mature	88	boobs	84	mask	84
1455	tonight	17910	party	7965	gonna	5813	partying	2050	rockin	986	town	715	poppin	575	club	446	messy	417	homies	161	bottles	158	champagne	152	rocking	107	drunken	103	booze	100	rockstar	96	encourage	82	sippin	70	wooohooo	64	clubs	46
1456	school	11978	ugh	9982	homework	9007	sucks	5660	boring	2866	:	2097	bleh	594	ughh	537	-.-	360	sigh	303	stinks	285	forgot	284	#N/A	256	stressing	243	gah	203	>.<	177	suppose	176	=	105
1105	photos	11177	pictures	7983	pics	7159	upload	5104	photo	4947	album	2714	tag	2358	check	2352	uploading	1876	uploaded	1869	posted	1434	tagged	1339	tagging	1106	picture	1088	editing	978	pix	977	pic	973	albums	916	videos	732	added	729
1450	love	13812	sister	8879	friend	4745	world	2711	beautiful	2076	precious	1637	sisters	1628	thin	1555	words	1467	shared	1453	share	973	thick	830	blessings	610	life's	487	lifes	387	kindness	368	speak	339	knowledge	335	lips	311	dearest	267
1103	money	9710	years	4030	copy	3707	saturdays	3349	sundays	3234	fridays	3102	based	2895	chinese	2749	arrive	2560	october	2459	called	2026	bags	2020	feng	1514	shui	1470	july	1394	min	1015	heck	444	philosophy	284	stops	202
1452	:	18880	sad	12049	miss	7296	sob	2236	;	1698	leaving	1656	missed	1166	missing	1150	poor	854	aww	732	awww	662	tho	591	bummed	438	sadly	317	awwww	161	booo	145	doggy	76	nooooo	36
1453	fully	4076	prepared	919	fed	813	recovered	728	dressed	607	loaded	393	recover	127	intend	127	aware	102	qualified	67	convinced	47	rested	46
1458	feeling	25655	bit	2294	feels	2033	overwhelmed	1543	depressed	1154	felt	1145	optimistic	980	slightly	921	nostalgic	859	gut	839	restless	758	anxious	682	stressed	653	guilty	632	confident	501	extremely	493	hopeful	469	strange	449	homesick	448	passes	398
1459	start	20413	make	6804	beginning	4785	ending	4392	fresh	3066	brand	2098	starting	601	pointless	510	experience	304	impossible	267	begining	236	maria	225	pride	206	whispered	136	beginnings	60	robinson	50	no-one	25
1108	fuck	51905	shit	3255	fucking	1841	shut	1729	sake	1028	bitches	495	bullshit	482	outta	358	fucks	250	haters	133	fuckers	85	outa	70
1109	<3	24916	:	9637	ily	4357	babe	1490	boyfriend	501	par	478	besties	406	bestie	394	=	320	xoxo	278	hacked	224	bestfriend	216	bf	202	ar	187	xo	128	bff	108	muah	105	object	104	babes	101	joey	95
1722	wtf	16025	damn	5588	shit	3819	wth	3055	wrong	2899	hell	2898	pissed	1413	supposed	1192	dude	762	happened	722	omfg	616	sm	488	bs	440	happend	413	fucked	409	suppose	360	pissing	356	dumbass	289	retarded	219	dammit	210
1723	island	13052	beach	2206	paradise	1921	shutter	1787	hawaii	1508	springs	1178	kings	888	palm	856	boat	849	treasure	768	desert	664	adventure	533	tropical	517	stranded	502	grand	461	cruise	360	resort	320	ocean	227	virgin	226	sailing	170
216	mmm	8300	mm	4156	mmmm	3996	sushi	3804	mmmmm	1462	craving	980	lunch	937	goo	874	mmmmmm	796	subway	782	sounds	706	starbucks	686	mmmmmmm	592	hmmm	558	smell	467	smells	384	bbq	378	cm	331	delicious	238	tasty	238
217	back	17225	time	14389	move	3292	manage	1682	decided	1067	rub	389	dump	379	pull	334	depressed	291	psyched	233	bruises	139	spark	110	position	81	hump	78	mic	35
214	hai	32610	ki	14002	se	12011	ko	9160	ka	8790	ho	8578	ke	8001	bhi	7160	nahi	7160	mein	7038	dil	6223	main	6099	hain	5944	kya	5695	jo	5251	hum	5208	aur	5035	koi	4837	ye	4599	tu	4326
215	wait	27678	can't	26485	till	7924	tomorrow	4101	meet	494	tomarrow	205
212	hat	9056	cowboy	2465	alan	2303	tip	2134	hats	1752	boots	1011	wear	1002	wearing	824	trick	478	dude	442	grab	350	tips	336	stole	251	record	229	misery	226	gloves	211	rabbit	210	devil	208	borrow	208	sorting	200
213	:-	22110	:-d	3944	;-	3627	:-	3493	:-p	1744	xx	1496	:-/	436	xxx	289	hehehe	253	xxxx	106	toooo	69	esp	66	wooohooo	48	xxxxxx	35
210	tickets	18112	ticket	10762	buy	4437	bought	4053	concert	2373	sold	1994	sale	1905	interested	1836	extra	1707	selling	1484	booked	1326	plane	1168	sell	1101	buying	992	seats	829	purchased	799	spare	788	asap	696	vip	578	bucks	504
211	sweet	24103	bitter	4645	taste	2568	revenge	2022	sweeter	1262	honey	1040	sixteen	848	sour	847	sweetest	602	smell	589	soft	576	bittersweet	531	innocent	432	served	408	tastes	395	dish	339	victory	315	nothings	304	tooth	302	buds	233
218	de	3818	en	3779	van	2498	op	2123	met	1927	te	1400	dat	1385	je	1315	er	1044	dan	945	om	823	nu	763	wel	677	ben	611	kan	472	wil	453	net	370	tot	298	mn	278	hoe	222
219	make	14098	mistakes	12499	learn	6689	made	4490	mistake	2918	admit	1659	perfect	1591	human	1302	experience	918	choices	867	learned	665	greatest	637	learning	620	correct	612	cheer	577	protect	537	regret	503	repeat	499	lessons	469	eternity	450
462	thing	3794	careful	3281	loves	2527	mine	2310	thin	1871	drop	1811	mess	1784	needed	1569	faults	1227	pick	1221	daughter	1092	thick	948	careless	882	rebel	586	man's	584	kick	546	dose	517	mans	390	butt	388	arm	337
4	snow	18644	roads	3787	drive	3460	car	3240	driveway	2555	ice	2360	stuck	2318	shovel	1565	driving	1502	road	1229	shoveling	1227	covered	1018	snowed	996	icy	898	clear	854	cars	764	inches	631	careful	612	cleared	574	street	548
1858	tonight	18782	excited	5860	hollywood	2581	concert	1810	cube	1343	forward	1181	meeting	1096	babysitting	866	pumped	860	church	789	banquet	316	solve	239	gig	178	companion	169	yayyy	150	solved	145	tx	120	unit	87	babysit	81	dorm	80
1859	doesnt	14850	dont	13677	feel	9649	anymore	4340	isnt	2428	matter	1798	wont	1416	bother	722	arent	640	shouldnt	516	deserve	330	wel	212	wouldnt	130	bothered	112	involve	60
1850	favorite	16209	quote	7747	quotes	2727	favourite	1961	what's	1766	buddy	1099	fav	984	elf	818	famous	775	random	565	cousin	535	actor	466	fave	417	character	403	singer	388	absolute	387	favorites	381	insert	377	courtesy	347	today's	290
1851	:	31794	text	3587	haha	2381	;	1237	funn	852	mall	545	mee	542	hmu	420	txt	410	todayy	371	bestfriend	333	tmrw	318	goood	268	cody	265	dayy	260	meee	245	babysitting	235	ily	228	aha	209	yayy	197
1852	albert	5444	genius	3242	imagination	2590	einstein	1710	knowledge	1561	insanity	1420	human	1390	universe	1318	important	1270	stupidity	1176	expecting	1004	pure	992	results	810	infinite	808	definition	560	violent	546	limited	538	ability	482	intelligence	443	limits	421
1853	days	26401	row	9814	nights	8117	working	2162	straight	1090	sleepless	837	boat	519	weekends	458	record	271	shorter	259	stream	205	gently	194	restless	72	ina	52
1854	ghost	8148	watching	4601	adventures	2354	town	1817	ghosts	1456	stories	991	scary	748	hunting	657	creepy	506	shows	450	girlfriends	399	talks	397	tour	371	haunted	370	haunt	334	shell	320	hunt	277	scare	249	marathon	205	hunter	202
1855	movie	15829	watching	10194	watched	3882	watch	3729	movies	3528	hangover	1693	hilarious	1592	narnia	1046	jackass	757	zombieland	656	trailer	618	funniest	585	marathon	549	film	519	despicable	451	dawn	407	theater	354	captain	288	transformers	276	alien	255
1856	things	23435	happen	21202	bad	6534	reason	4821	happening	2219	happened	1573	exciting	563	expect	456	bound	391	unexpected	289	planned	262	somethings	254	it'll	251	eventually	240	reasons	202	accidents	193	anytime	183	surely	163	shouldnt	140	outcome	109
1857	pizza	25639	hut	2632	eating	2405	eat	2117	ate	1598	ordered	1147	order	1119	rolls	849	delivery	773	hungry	766	papa	687	large	579	ordering	546	yummy	529	slice	514	homemade	499	craving	436	mmmm	419	frozen	404	stuffed	357
919	point	26329	what's	4854	whats	3159	view	2266	leslie	1402	breaking	1016	turning	959	reached	866	blank	609	return	592	period	539	rip	373	boiling	251	prove	230	pointless	210	points	206	wats	189	surely	169	sane	160	prefer	156
918	christmas	37807	merry	21209	year	5608	family	3987	holidays	3305	holiday	2650	xmas	2522	season	2087	wishing	1476	celebrate	1352	enjoy	1278	safe	1225	jesus	1198	eve	1061	x-mas	1008	feliz	985	blessed	914	spirit	501	gifts	432	celebrating	396
915	you'll	25179	find	7061	i'll	6196	you're	6147	won't	1760	promise	1683	you've	1102	you'd	961	regret	839	eventually	368	haunt	363	disappear	307	excuse	291	guarantee	268	discover	211	they'll	209	forgotten	200	belong	185	chase	183	irony	121
914	government	4709	freedom	2896	rights	2481	country	2158	thomas	1762	political	1194	democracy	1116	liberty	1092	america	1077	power	958	society	958	nation	949	human	925	state	847	civil	800	american	749	states	672	war	647	justice	614	united	602
917	size	5216	small	4540	boobs	4339	bigger	3906	big	3088	large	3011	smaller	2066	penis	1878	huge	1393	normal	1227	medium	939	larger	744	breast	703	belong	634	tiny	600	sized	598	fit	525	bra	497	tits	320	fits	305
916	college	8170	university	5863	student	4211	accepted	3726	program	3218	students	2901	campus	1869	degree	1629	graduate	1333	officially	1233	scholarship	1161	colleges	949	applied	771	nursing	759	grad	754	education	700	engineering	689	apply	675	masters	659	schools	640
911	christmas	23477	presents	8693	shopping	5299	gifts	4796	xmas	4580	present	4366	gift	4342	wrapping	3422	merry	2055	wrapped	1915	wrap	1864	eve	1614	cards	1544	tree	1463	bought	1092	opening	715	opened	679	x-mas	658	santa	632	buying	522
910	days	32732	till	24399	counting	3494	sleeps	1116	bday	461	graduation	414	vacation	398	b-day	323	florida	189	x-mas	144	dayz	143	day's	112	hawaii	103	graduate	92	arrives	90	collapse	81	europe	54	maine	43	eleven	42	wooooo	42
913	bit	17895	:/	15716	ly	11742	http	11660	rt	2814	gay	1602	lesbian	1419	join	1399	national	1259	clicking	872	ow	861	donate	801	states	592	ally	533	gd	411	youth	349	recognize	334	sending	309	artists	286	legends	285
912	mall	14161	shopping	3998	phil	1800	store	799	collins	735	heading	695	center	364	starbucks	342	america	334	walmart	276	stores	255	asia	196	sm	191	haircut	190	mal	188	shoppin	176	cop	175	crowded	113	headin	94	ikea	79
516	hell	30530	heaven	5519	bloody	3670	outta	640	drag	560	hotter	403	gates	363	hole	351	paradise	322	highway	318	naw	317	hath	247	bent	231	company	222	serve	194	proof	191	frozen	187	froze	178	eternity	165	satan	157
1423	it's	30439	time	12745	late	7187	turn	1106	begin	710	knowing	626	apologize	406	limited	384	o'clock	292	earth	212	fullest	115	would've	53	underneath	51	woulda	31
1933	love	16824	friends	15766	family	9713	guys	9229	miss	8359	missing	869	eachother	753	y'all	536	bestest	429	dearly	398	visit	297	besties	293	dearest	259	specially	231	ya'll	157	freinds	123	xoxo	122
1932	nervous	13871	excited	12993	tomorrow	9783	kinda	2951	anxious	1882	scared	1398	starting	1375	luck	1327	breakdown	926	interview	500	wreck	480	audition	440	surgery	417	extremely	363	worried	354	auditions	334	presentation	258	stressed	253	orientation	240	exited	187
1931	i'm	40996	excited	6929	gonna	3130	glad	1264	exhausted	1033	dork	833	nerd	700
1930	workout	7087	gym	5730	sore	3030	body	2493	exercise	1896	abs	1650	legs	1381	weights	1309	ab	1185	lifting	1037	training	975	muscles	964	shape	963	intense	806	weight	802	bench	652	arms	624	routine	620	session	600	leg	590
1937	level	11779	higher	3985	high	2528	score	2513	highest	1997	low	1814	lower	1800	points	1648	levels	1518	reached	1386	standard	1040	average	873	lowest	814	standards	719	grade	710	results	459	scale	391	skill	340	upper	330	achievement	309
1936	poor	11239	rich	9148	tsk	5999	famous	968	riddle	625	wealth	507	caught	445	poverty	441	man's	319	content	292	maze	280	wise	273	piss	259	afford	233	tragedy	216	mans	201	greedy	200	pity	196	unfortunate	189	powerful	172
1935	face	31966	punch	15250	slap	2644	smiley	1874	sucker	1848	angry	984	punched	762	upset	550	punching	483	fist	451	finger	354	deserves	262	pinch	237	stab	199	stuffing	155	insert	140	gut	114	gladly	88	repeatedly	84	>:	72
1934	day	24516	ruin	3870	brighten	1045	remembered	780	smiles	216	promising	26
1939	nice	11962	quiet	7998	home	6291	enjoying	5940	evening	4574	house	3587	relaxing	3028	kids	3022	peaceful	1544	hubby	1514	sitting	932	enjoy	920	peace	811	afternoon	674	enjoyed	594	kiddos	389	company	292	ahhhh	273	napping	200	relaxin	182
1938	weekend	20099	fun	16040	ready	2830	filled	2546	lots	2068	forward	1690	exciting	1148	planned	1032	parties	929	begin	877	plans	682	partying	608	busy	568	camping	360	weekends	288	begins	284	eventful	256	adventures	239	activities	214	relaxation	195
847	knowing	11605	feeling	6222	:-	3829	wanting	1667	worst	1436	part	1192	putting	1060	missing	944	worse	920	wisdom	815	sucks	745	knowledge	708	fruit	600	waking	586	wondering	527	creativity	359	dread	276	realizing	274	tomato	274	salad	219
846	street	18298	walking	7098	nightmare	3255	walk	2010	main	1753	corner	1609	elm	1588	streets	1463	middle	1133	fighter	885	walkin	440	walked	417	wandering	399	downtown	394	campus	332	sidewalk	260	neighborhood	253	union	250	passing	234	sleeps	189
845	kick	21070	ass	17730	butt	6092	kicked	5296	beat	1724	kicks	1052	boxing	815	balls	638	rocks	618	gear	585	match	551	butts	521	kicking	517	arse	429	asses	422	outta	388	chess	345	nuts	323	booty	295	bucket	197
844	ur	45181	dont	7367	cuz	3446	wen	2651	wat	2141	ppl	1838	kno	1360	urself	1104	wats	568	urs	532	isnt	416	tht	396	bc	318	rite	308	tru	199	knw	177	fav	173	nvr	164	remeber	164	sayin	163
843	music	6473	piano	6334	play	6220	playing	3674	violin	1556	played	1467	practice	1439	practicing	1435	listening	1429	instrument	992	guitar	970	musical	783	piece	771	jazz	696	notes	690	symphony	648	plays	618	solo	604	learning	587	horn	525
842	excited	9422	im	8290	sooo	8191	soooo	5155	omg	4689	soo	2922	sooooo	2764	jade	1370	ahhh	970	ahhhh	937	sooooooo	895	freakin	811	soooooo	747	nervous	558	exited	511	goood	442	soooooooo	428	ahhhhhhh	155	ahhhhhh	112	iam	109
841	people	17499	world	11849	imagine	4321	kinds	1619	travel	1310	meet	1269	there's	1067	weapon	870	places	866	billion	862	types	636	kill	610	strange	465	join	425	struggling	387	countries	365	seas	352	everybody's	339	facing	284	disagree	245
840	stage	4621	play	3674	scene	2685	act	1955	part	1892	plays	1646	lines	1625	main	1217	script	1070	acting	1047	role	901	character	784	actors	773	diving	742	divine	666	shakespeare	638	drama	614	parts	565	comedy	527	actor	493
849	funny	16449	it's	15735	thinks	9754	people	6824	isn't	1998	finds	1553	hilarious	1120	ironic	771	irony	219	entertaining	159	nicer	108	bone	82	soooooooooo	43	entertained	31	unfortunate	17
848	skin	7010	face	3543	scratch	2331	body	1371	itchy	1193	itch	1180	rub	1039	smooth	1018	dry	801	covered	651	layer	624	soft	607	spots	482	belly	424	marks	411	sunburn	394	chin	363	bones	339	nose	337	puts	324
459	cookies	16622	chocolate	7106	making	5318	chip	5126	baking	4929	brownies	2837	cookie	2536	bake	2360	sugar	1713	baked	1617	yummy	1145	cupcakes	1087	oatmeal	1080	milk	1029	cake	1008	oven	946	homemade	867	fudge	785	batch	773	delicious	703
1587	round	21785	world	7414	makes	2615	spin	2430	spinning	2352	corner	1515	wheel	979	wheels	938	ride	937	circles	921	circle	726	turning	494	dizzy	472	worthwhile	425	record	400	square	361	rockin	250	walkin	235	gather	209	stops	174
1739	ga	2602	lagi	2399	ini	2153	hari	2143	di	2091	jam	1713	dah	1298	mau	1250	lg	1211	ke	1132	yg	1038	tp	961	ada	940	dan	853	sakit	851	jd	669	lama	504	apa	484	yang	475	nya	466
1738	work	7820	parents	5630	job	4075	made	3700	wanted	2375	gave	1977	chores	1883	kid	1489	everyday	1413	grew	1092	church	878	respect	798	pride	754	law	582	morals	578	household	522	agree	440	suggested	437	taught	178	grounded	146
1731	toilet	7792	pee	4338	bathroom	3538	paper	2993	poop	2585	pants	2492	potty	1800	floor	1052	seat	1012	poo	889	diaper	870	pooped	680	peed	652	peeing	623	training	502	public	477	piss	467	trained	450	wipe	426	sink	388
1730	light	12993	darkness	7034	dark	3565	fear	2690	darkest	1625	deepest	1544	shine	1502	shadows	1180	shadow	821	powerful	802	measure	798	sight	682	dawn	592	brightest	576	guide	459	brilliant	405	meaning	374	secrets	361	fades	358	sadness	320
1733	feel	22033	felt	10350	bad	7547	real	1602	earthquake	618	suddenly	400	goo	377	numb	294	relieved	289	relaxed	202	helpless	195	comfortable	187	awful	160	refreshed	139
1732	she's	36575	girl	4990	she'll	3827	thinks	2406	she'd	669	smart	391	that'll	361	wonders	341	tells	315	girlfriend	258	league	216	girl's	200	whore	140	daddy's	128	saint	126	acts	121	realizes	121	sister's	107	quicker	106	mattress	95
662	sky	11055	stars	9269	moon	7144	star	2630	sun	2538	falling	2358	reach	1705	clouds	1636	limit	1445	earth	1297	shine	1245	fly	1043	shoot	1002	land	933	light	927	touch	921	bright	836	dark	820	you'll	820	clear	780
1734	things	28774	lot	6282	mind	4956	alot	4771	make	3926	easier	2724	thinking	2493	learned	620	figure	404	do:	293	whatsoever	290	sort	277	sorts	269	differently	267	tend	261	clear	227	shouldn't	220	happening	157	stressful	124	quicker	96
1737	phone	14923	blackberry	3139	mobile	2780	iphone	2592	verizon	2058	droid	1872	phones	1660	cell	1256	sprint	1173	device	1159	upgrade	880	android	836	service	689	contract	570	sony	510	galaxy	451	lg	446	bb	431	curve	392	switch	380
1736	make	13186	smile	3820	thought	2776	buzz	2721	forget	2588	crazy	2402	dance	2318	drive	1804	fool	1703	wild	1647	fall	1603	record	1463	sing	1454	sunday	1367	sun	1283	breathe	1269	dizzy	1249	spin	1231	gold	1219	shine	1113
1039	perry	4507	katy	4436	tyler	2129	singing	545	teenage	527	firework	488	rihanna	445	fireworks	411	california	341	cruz	332	katie	242	rick	227	obsessed	170	where's	149	dynamite	143	spinning	116	string	110	eminem	88	fred	85	fave	83
753	break	32883	spring	14662	bones	2317	sticks	1827	stones	1552	thanksgiving	1416	chains	1328	prison	555	sem	416	smell	411	perfectly	337	breaks	257	begins	231	brake	221	gimme	189	chain	90	repeatedly	67	sting	58	rihanna	58
752	church	22717	sunday	3824	service	2900	pastor	2382	worship	1964	christian	1725	youth	1429	praise	548	bible	544	prayer	511	gospel	497	choir	494	community	379	catholic	359	god's	337	services	333	leading	283	conference	281	priest	275	spiritual	266
751	night	17452	date	9158	dinner	6944	great	4990	movie	3605	hubby	3299	wonderful	1451	lunch	1013	girls	1009	prom	722	movies	615	romantic	588	enjoyed	511	fantastic	469	fabulous	386	takers	383	husband	381	drinks	373	sweetie	315	sushi	294
750	great	8988	awesome	6098	yesterday	3488	nelson	2070	hung	304	thrilled	108
757	da	8087	se	6140	je	5880	ne	4622	na	4525	mi	2755	sam	2109	ja	1995	ti	1557	su	1368	pa	1198	bi	1078	te	998	si	980	po	899	ima	808	iz	669	ali	650	dan	631	ta	630
756	bell	9951	taco	8874	tacos	2924	burrito	1466	mexican	1347	ring	1055	ate	802	tuesday	742	nachos	484	saved	478	rings	400	craving	398	mmmm	347	margaritas	345	rang	334	salad	307	bueno	263	del	256	bean	244	ringing	223
755	weird	14320	strange	5545	kinda	2113	feels	1818	odd	1804	normal	1758	hyper	1627	mood	1566	reason	1426	acting	1327	crazy	1276	sounds	1012	kind	989	o.o	787	dreams	719	hmm	601	hmmm	529	combination	489	random	400	noticed	394
754	comment	853	ago	742	ll	248	8p	240	wave	239	balloon	145	os	97	snowball	81	pacific	75	traveling	37	travelling	15
759	john	29214	dear	4642	lennon	1704	paul	797	legend	728	edward	617	wayne	507	kennedy	376	imagine	309	terry	234	lewis	220	beatles	216	wooden	177	butler	164	denver	138	pipe	100	stewart	82	mil	81	alexander	77	dreamer	61
758	we'll	18814	i'll	3887	we're	3791	end	3035	stay	1988	alright	1877	forever	1725	let's	1715	won't	1517	float	1134	meet	1038	it'll	858	they'll	629	we've	492	stick	294	he'll	150	lovers	130	eachother	116	i'ma	88	shortly	84
1595	night	22118	fun	10267	blast	5254	great	4964	party	4581	awesome	2697	danced	1050	awsome	818	lastnight	762	hangover	674	ended	607	dancing	566	recovering	561	prom	528	enjoyed	523	rocked	402	showed	309	girl's	231	absolute	219	hungover	219
506	big	18642	bang	11464	theory	4405	ban	1184	shot	569	sheldon	475	gang	395	booty	328	penny	184	cooper	184	awful	159	drum	122	larry	115	tidy	112	seasons	108	evolution	105	buck	92	thumbs	87	string	81
1597	pics	16567	pictures	14229	post	5183	senior	3002	taking	2370	upload	2174	posted	2090	check	1686	posting	1645	camera	1427	uploading	951	videos	800	uploaded	784	prom	742	pix	619	putting	611	photos	566	pic	443	tons	379	bunch	346
1596	found	2261	nuclear	1672	power	1016	average	959	majority	928	japan	822	dangerous	537	plant	533	explosion	532	speaker	464	avoid	444	agree	389	leaders	387	weapons	364	cuts	339	japanese	324	asian	277	president	259	prevent	246	disaster	230
1591	cat	26644	kitty	6841	kitten	3782	cats	3396	kittens	2411	dog	1502	vet	1092	poor	931	killed	855	lap	816	mouse	713	stray	657	fur	609	pet	568	tail	556	named	524	pussy	515	adorable	408	curiosity	382	soft	348
1590	friends	37252	family	17291	fb	6292	dear	1047	hang	922	closest	708	close	639	misses	515	hanging	414	catching	327	ya'll	147	suggest	85	depend	83	boyfriends	51
1593	xa	13852	d:	44
1033	ma	953	di	923	moi	864	nay	708	va	614	ca	611	wa	514	con	511	ban	481	bi	470	oi	455	dang	434	mat	421	ai	379	dc	363	chi	348	ta	337	tu	334	cu	319	mai	292
1599	blue	20610	sky	6066	eyes	4034	green	2690	skies	2629	clear	1555	white	1521	dark	1504	bright	1435	color	1416	grey	1364	gray	1359	red	1352	colors	1343	sun	1248	clouds	1236	shade	790	brown	677	shades	653	bleed	630
1030	bloody	7799	cos	2114	arse	1315	shite	1067	thinks	1057	rubbish	841	twat	806	brilliant	791	mate	788	sort	771	load	743	mates	676	fed	661	whilst	655	proper	572	typical	559	coz	556	piss	508	massive	462	aswell	438
1025	lot	33133	parking	6056	means	2738	spot	1238	easier	1168	awful	714	beginning	667	walmart	547	expected	409	explains	334	helped	299	paradise	201	spots	191	wal-mart	178	campus	159	nicer	145	permit	132	quicker	118	spaces	90	crowded	85
1024	work	18802	hours	10539	working	7119	week	6683	worked	2532	overtime	1616	paycheck	1074	paid	1054	extra	944	schedule	754	exhausted	621	atleast	389	ot	347	shifts	306	volunteer	271	boss	256	scheduled	190	regular	130	dragging	105	volunteering	92
1027	james	1998	michael	1914	chris	1580	andrew	1478	david	1226	ryan	1200	alex	1197	smith	1096	john	1096	thomas	1067	daniel	1039	josh	976	aaron	973	matt	926	brandon	899	johnson	871	nick	870	tyler	853	kyle	844	lee	821
1031	fml	17387	traffic	4664	stuck	4476	ugh	3202	fm	2552	sucks	1991	wtf	1089	jam	869	worse	529	pissed	511	-_-	404	ughh	361	ughhh	316	-.-	262	shitty	232	grrrr	224	ruined	222	ughhhh	201	grrr	201	grounded	168
1021	xd	942757
1020	trouble	14271	kind	1449	maker	1272	sleeping	1048	finding	999	causing	575	prepared	574	add	460	adore	420	misunderstood	420	treated	338	ideal	325	avoid	282	troubles	278	prepare	252	saves	196	figuring	184	surely	176	caused	165	odd	149
1023	fuck	11081	fucking	10552	shit	6203	bitch	3130	ass	2775	fuckin	2662	asshole	2209	cunt	1769	dick	1749	pussy	1443	bitches	1166	motherfucker	997	assholes	869	piss	761	dumb	756	whore	635	cock	594	fucked	562	bastard	561	tits	560
1022	monkey	7949	monkeys	2794	squirrel	2192	nuts	1712	flying	1293	funky	1262	nut	1135	bananas	659	purple	492	bars	454	zoo	382	sock	356	joke	336	giant	325	stole	282	ninja	257	spider	242	retarded	242	poo	230	thumbs	210
1036	love	18279	molly	2861	mae	1310	choosing	500	prepare	294	peoples	178	constantly	175	maggie	162	extend	135	annoy	109	:'	96	surrender	63	sissy	57	jessie	52	specially	44
1029	boring	23328	kinda	1997	exciting	1578	interesting	1355	sigh	667	dull	553	lame	449	extremely	420	incredibly	416	slow	407	sundays	354	excitement	347	pointless	304	usual	281	soooooo	275	lectures	268	depressing	261	boredom	246	yawn	236	weekends	217
1028	day	21132	long	11388	work	7058	tomorrow	6139	ready	4164	bed	3512	exhausted	1363	stressful	918	relax	734	hectic	579	stretch	230	meetings	180	bedtime	148	resting	138
1037	skills	2024	management	1747	business	1240	learning	1234	information	1200	research	1109	communication	1031	engineering	1005	development	934	technology	899	education	689	marketing	685	analysis	647	process	646	design	634	students	629	career	607	knowledge	599	professional	565	systems	559
1034	people	10718	promise	8719	make	7904	leave	3433	made	2671	turn	2624	send	2056	promises	1876	comment	1857	forward	1380	rules	1048	pay	969	promised	492	deliver	428	intend	367	pinky	306	creative	245	update	216	offering	200	keeping	196
501	back	20881	coming	12047	home	6340	cali	2790	nicely	1347	town	894	leaving	743	cal	359	buddy	345	sd	304	haunt	220	utah	154	recovering	108	tuned	101	pit	99	settling	95	rollin	57
605	evening	13361	afternoon	5436	wonderful	5071	spent	4703	lovely	4093	spending	2768	nice	2136	spend	1857	enjoyed	1597	dinner	1403	relaxing	1085	enjoyable	763	enjoying	666	fantastic	589	catching	547	husband	453	fabulous	360	hubby	305	company	291	delightful	206
604	lesson	13672	learned	10842	taught	5352	lessons	3096	driving	2778	test	1724	learnt	1511	teaches	1077	teach	1008	valuable	876	difference	717	important	693	plans	628	teaching	624	fortunate	623	jealous	571	teacher	490	experience	468	toys	466	piano	440
607	people	12197	treat	11052	treated	3771	person	3288	respect	3074	deserve	1793	expecting	1183	act	1086	meet	978	karma	858	fairly	686	expect	657	react	631	badly	625	trick	610	treating	595	treats	569	rude	481	charge	481	deserves	471
606	wondering	9837	case	7200	lily	2577	allen	2308	po	1347	curious	502	wonderin	258	stood	235	dreaming	205	jared	202	anyone's	136	hiccups	133	classic	123	raven	112	mortal	110	emergency	98	annie	96	active	76	watson	60	exception	57
601	lady	28420	gaga	10629	video	1125	telephone	781	beyonce	628	romance	559	monster	348	poker	279	nonsense	250	rihanna	216	wakes	209	fantasy	177	sings	136	speechless	129	outfit	123	fame	121	cells	120	monsters	85	classy	74	vid	63
600	game	29336	football	10609	tonight	5886	watch	4123	play	2400	basketball	1565	hockey	1307	boys	796	season	679	homecoming	671	volleyball	624	baseball	564	intense	487	pumped	480	twins	446	eagles	350	cheer	346	stadium	257	cheering	144	vikings	126
603	moved	6621	room	5127	house	4615	moving	3544	move	3518	finally	3233	apartment	3228	dorm	2705	roommate	2326	stuff	2078	basement	1159	roommates	1142	upstairs	1088	living	910	downstairs	703	internet	658	settled	654	roomie	536	apt	468	campus	467
602	hope	12282	jo	5083	wel	3978	ther	2536	wil	942	tonite	836	hopes	322	tmrw	171	tommorrow	171
1205	ladies	15431	girls	3128	single	2632	gentlemen	2613	lovely	1700	gentleman	857	fellas	799	dynamite	460	fabulous	452	prefer	315	cheers	262	women's	163	classy	128	girlfriends	97	extraordinary	90	beyonce	87	gals	68	brunch	66
1204	button	12319	dislike	3739	hit	2850	belly	2214	press	2191	pause	2137	buttons	1800	rewind	1552	fast	1417	push	1181	delete	989	where's	703	reset	666	snooze	663	remote	606	unlike	513	case	504	undo	440	curious	410	hitting	372
1207	life	27947	lovin	10419	livin	4008	relay	911	ruining	771	atm	271	enjoyin	250	fullest	153	phase	130	givin	104	hatin	69	thrill	41
1206	work	10483	feeling	3839	bore	1062	wondering	592	sucks	382	hmm	248	haircut	159	hmmmmm	158	tommorrow	96	offically	69	hmmmm	54	sucked	43	skip	36	#N/A	30	sleepin	24	napping	18	compete	7
609	teach	5663	kids	3713	pumpkin	3447	patch	3005	dora	1748	pumpkins	1745	smashing	1114	that'll	1053	parents	740	sour	689	halloween	664	picking	391	seeds	363	jerk	337	rough	220	autumn	157	backpack	149	snuggie	140	tricks	112	attempting	85
1210	art	17039	design	3951	museum	2619	artist	1734	history	1311	project	1151	studio	1026	artists	829	painting	829	creative	827	piece	785	arts	646	science	594	portfolio	583	projects	543	drawing	523	create	512	photography	452	natural	407	master	381
1203	season	21946	watching	6764	finale	3746	watch	3722	dexter	3574	episode	3178	series	1964	finished	1832	watched	1725	episodes	1434	tis	1351	seasons	1331	premiere	1308	supernatural	1203	glee	998	anatomy	797	marathon	752	grey's	718	dvd	698	weeds	676
1202	home	44995	sweet	15535	alabama	615	homesick	162	jog	56	improvement	55
1211	left	4752	stay	2518	head	2456	save	1775	brain	1601	problem	1475	wrap	1345	block	1092	calm	947	box	940	confirmed	846	remove	838	baby's	835	kitchen	814	mama	766	automatically	756	breathe	739	warning	703	cousin's	628	monitor	625
634	action	6431	brad	3858	chain	2291	reaction	1837	kayla	1531	month	1455	son	1216	shot	1196	prayer	932	condition	930	critical	724	chest	676	figures	609	opposite	460	packed	392	equal	342	urgent	323	request	301	command	200	replay	76
635	stressed	5242	annoyed	4031	tired	3838	frustrated	3790	extremely	3082	pissed	2871	irritated	2770	feeling	2678	depressed	1967	confused	1908	slightly	1588	upset	1070	grumpy	978	mood	899	disappointed	883	exhausted	636	worried	571	angry	570	max	435	cranky	422
1214	mae	1280	cruz	1182	marie	1134	ate	885	ann	870	john	847	anne	772	santos	671	kay	664	mark	572	garcia	555	grace	518	maria	508	jane	494	tayo	479	mary	471	kim	424	tan	403	kayo	399	karen	398
1215	camping	10594	weekend	10255	trip	4798	tent	1655	beach	1592	fishing	1391	lake	1390	blast	1135	hiking	860	camp	747	swimming	595	bonfire	508	cabin	465	river	399	adventure	386	planning	327	backyard	294	mountains	288	bbq	231	woods	222
1111	alarm	7961	morning	7714	clock	7019	wake	3616	woke	3584	set	3297	late	2538	early	1913	slept	1178	waking	1165	minutes	1039	sleeping	930	FALSE	841	clocks	701	forgot	680	woken	561	setting	521	internal	429	earlier	424	08:00:00 AM	422
1110	haven't	14020	havent	8172	talked	4399	forever	3317	years	3078	awhile	3037	ages	2768	slept	2580	started	1644	havnt	1456	felt	1416	hasn't	1257	ye	759	eaten	714	hung	574	hasnt	500	spoken	480	clue	428	laughed	351	touched	320
1113	reason	30888	reasons	4042	odd	1845	there's	1712	apparent	1351	season	973	unknown	888	main	780	strange	515	explain	462	whatsoever	395	excuse	359	lifetime	280	rhyme	208	logical	192	explanation	185	specific	159	logic	136	intention	130	obvious	129
1112	bored	9944	im	8785	bore	4287	tired	3941	sooooo	3310	soooooo	2607	tire	2046	sooooooo	2017	soooo	1900	soooooooo	1630	sooooooooo	1373	soooooooooo	1024	sooooooooooo	982	freakin	693	exited	197	entertain	154	effin	127	friggin	112	hyper	95	sooooooooooooooooooooooo	87
1115	soup	9622	chicken	7468	making	3683	noodles	3441	eating	2829	noodle	2734	dinner	2725	ramen	2453	homemade	1592	lunch	1158	pot	1086	bowl	1036	yummy	964	rice	956	mmm	734	cooking	700	pasta	655	delicious	649	potato	615	mmmm	603
1114	good	23359	bad	21010	news	18017	lindsay	250	recieved	121	pilot	70	lands	22
1117	day	20027	work	11865	today	8297	tomorrow	6656	busy	6251	stressful	623	scheduled	544	planned	335	exhausting	258
1440	mommy	16308	daddy	11834	baby	5279	loves	4916	flip	3433	flops	1539	daughter	1290	mummy	1181	misses	649	babies	630	daddy's	475	momma	325	baka	253	dearest	169	sissy	153	awww	147	sweetie	101	babys	94	baby's	84	boyz	72
1119	hair	32079	cut	26253	short	7061	haircut	2717	cutting	1983	bangs	1356	grow	1271	shorter	1020	style	917	inches	820	chopped	723	length	436	chop	411	growing	401	locks	361	cuts	329	dyed	327	scissors	325	hairs	307	salon	297
1118	gotta	34829	love	15649	em	1985	catch	798	outta	677	admit	657	kidding	397	everybody's	295	somethings	290	brb	189	movin	140	something's	128	keepin	45	bold	41	somebody's	24
1351	don't	32315	worry	17470	bout	1956	alright	1183	worrying	879	trouble	807	fine	729	worried	699	it'll	654	shouldn't	406	worries	330	troubles	130	singin	111	concern	94	whatsoever	41
1449	morgan	10406	katie	900	hanging	885	alex	706	emily	503	captain	492	amy	466	smith	448	courtney	401	sarah	373	elizabeth	333	kayla	326	paige	304	jordan	303	rachel	292	brooke	270	dexter	262	shannon	257	liz	250	megan	241
1448	don't	29970	anymore	7320	bother	5631	won't	3996	worry	2373	care	2162	doesn't	2161	reason	2108	didn't	1844	point	1622	there's	1544	realize	1482	matters	851	recognize	336	argue	172	bothering	122	slipping	101	gangsta	98	farther	91	straw	57
1350	back	22603	normal	15601	routine	2448	regular	1286	usual	988	daily	946	schedule	904	boring	838	return	619	perfectly	306	returning	241	repeat	227	returned	213	resume	210	expected	169	shortly	136	returns	131	extraordinary	117	activities	86	overrated	81
461	bring	26592	back	10863	troubles	1242	horizon	1013	kind	803	ahead	741	bought	467	bat	350	provided	55	snacks	55
1356	california	4935	girls	2989	daisy	1945	we're	1584	southern	1551	melt	1080	disneyland	1053	top	1025	fierce	822	fine	777	young	713	fresh	623	unforgettable	612	we'll	578	skin	556	cali	534	depends	515	weak	342	tender	341	bigger	324
463	friends	12791	family	8421	attention	8323	list	8195	let's	6999	glad	5554	count	5443	single	4961	result	4353	pays	4132	decision	3922	paying	3721	copy	3519	conscious	3467	cherish	2467	part	2378	wanted	2272	paste	2092	lets	2005	friendship	1826
489	i'm	33191	tired	16922	hungry	3028	bored	2305	exhausted	796	freaking	586	sleepy	453	sooooooooo	304	stressed	264	grumpy	259	pretending	251	lazy	218	lonely	214	sooooooo	130	irritated	97	thirsty	79
488	amount	6324	large	2441	amounts	2201	ridiculous	1638	massive	1583	increase	1428	small	1032	directly	840	maximum	749	population	643	huge	610	rate	568	average	547	total	532	lower	420	mass	391	active	369	minimum	362	supply	343	alcohol	334
487	homework	20879	hw	9530	math	4801	finished	3147	finish	2463	doin	1539	english	1400	spanish	1180	finishing	739	teachers	640	ton	530	algebra	527	tons	424	maths	402	geometry	356	accounting	290	french	269	procrastinating	225	physics	218	chores	214
486	that's	17260	thing	7371	guess	5931	there's	2026	isn't	1594	mine	1294	volcano	1137	donald	1112	meets	968	tornado	668	ash	481	bothering	234	roast	145	blinded	129	routine	115	europe	79	messing	71	practically	53
485	hmmm	9888	lo	9488	hmmmm	4472	wondering	3411	thinks	2645	hah	1999	figure	930	whats	924	ahhh	706	shouldnt	306	contemplating	273	procrastination	125	nevermind	93	hahahahahaha	46	completly	18
1354	nap	23262	taking	6256	woke	6046	hour	5622	afternoon	2176	naps	1935	needed	1257	power	1235	quick	1014	hr	663	exhausted	583	takin	556	earlier	516	napping	379	wakes	199	noon	185	nana	148	cranky	146	deserved	134	refreshed	128
483	man	11707	sexy	9674	young	6071	lady	3188	woman	2845	beautiful	2704	handsome	1612	grown	1563	beast	1172	smart	1003	ladies	829	men	805	classy	681	gorgeous	621	women	568	attractive	387	gentleman	375	intelligent	375	tall	302	confident	267
482	dinner	16716	cook	8447	cooking	6745	food	2320	cooked	2104	meal	2066	making	1956	chef	1531	kitchen	1520	breakfast	1231	supper	986	thanksgiving	935	cookin	836	delicious	747	meals	631	hubby	612	dishes	571	dessert	468	hungry	465	steak	410
481	headache	19004	migraine	3046	massive	2756	ugh	2587	worst	2335	woke	1587	rid	1530	hangover	1428	horrible	1374	killer	1313	terrible	1279	headaches	1220	huge	1219	giving	1040	worse	757	major	695	sinus	486	pounding	474	slight	358	awful	260
480	change	14011	life	12403	things	5722	changed	5656	thing	3167	changing	1642	matter	1456	situation	1365	attitude	1165	continue	851	wouldn't	841	fact	699	act	690	react	684	realize	593	determined	562	longer	555	brings	441	choice	426	outlook	423
199	imma	10728	im	9470	ima	8468	cuz	4484	gon	1562	yea	1070	bout	1010	idk	989	aint	691	swear	672	lovin	396	outta	346	beast	334	lookin	330	shawty	300	thinkin	268	spark	263	somethin	227	tryna	153	hella	117
198	movie	12308	watching	10585	avatar	7400	watch	4343	transformers	2403	watched	2228	movies	2044	watchin	1730	airbender	1629	film	876	dvd	674	series	526	marathon	474	revenge	458	fallen	407	amazin	295	inception	265	fav	252	titanic	230	legend	215
195	park	23601	linkin	2103	picnic	1548	par	1300	water	1264	parks	1194	theme	942	central	659	trailer	563	national	492	skate	472	playground	311	zoo	307	fireworks	287	bench	270	rides	242	lincoln	235	swings	216	swing	213	kiddos	140
194	phone	21336	call	14043	text	12142	cell	10006	number	8071	txt	2449	phones	2021	texting	1956	message	1291	service	864	ahold	835	internet	828	contact	763	reach	656	unlimited	509	email	358	msg	274	grounded	243	asap	243	reception	212
197	it's	38743	snowing	9447	cold	4032	degrees	1695	supposed	782	freezing	580	sticking	325	windy	168	colder	143	snowed	130	frickin	87
196	yay	31556	tomorrow	3801	finally	3505	friday	2934	:d	2855	excited	1226	nay	743	sarcasm	333	^_^	238	finaly	223	^.^	214
191	working	26769	hard	5406	isn't	5386	isnt	4773	workin	2046	properly	1113	stopped	1089	chat	346	ou	339	aren't	262	annoyed	191	msn	159	projects	145	arent	109	stops	97	correctly	93	frustrating	81	printer	63	overtime	53	elses	29
190	started	17908	ended	5750	hasn't	3903	haven't	2008	stopped	1303	hasnt	1069	happened	932	turned	923	began	500	ending	380	crappy	318	barely	288	raining	243	randomly	238	picked	228	rained	223	rear	203	realised	197	rough	188	continued	186
193	good	22854	mood	13729	bad	9043	pretty	2320	surprisingly	956	vibes	407	ridiculously	73	amazingly	69	oddly	67	depending	31
192	people	12193	forget	3830	short	3583	drama	3418	create	3358	focus	3133	walk	3119	laugh	2989	surround	2354	part	1836	pointless	1788	agree	1644	living	1525	treat	1497	pray	1212	falling	1107	re-post	711
1106	gonna	19117	we're	14050	doug	1437	dream	1312	tiger	707	tigers	572	berry	565	snooze	428	suit	383	crystal	330	cozy	209	one's	201	murdered	170	bestfriend	118
1107	people	17781	country	1735	homeless	1682	needed	1599	america	1455	ill	1294	children	1167	shame	1163	won't	1102	shelter	868	guts	795	benefit	767	tv	618	eating	578	haiti	564	meds	542	elderly	491	treatment	439	hundreds	436	thousands	361
1274	omg	43192	sooo	866	soooo	583	soooooo	500	om	370	amazin	282	usher	239	lolz	176	soooooooo	168	sooooooooo	160	belive	153	soooooooooo	142	sooooooooooo	110	beleive	65	yessss	32	faint	29
1104	home	20331	coming	7663	tonight	6222	staying	6108	company	743	chilling	382	resting	313	finds	234	species	99	deepest	90	thankfully	74	overnight	41	yess	36	homesick	21
1457	finally	20720	found	14269	yay	7204	figured	3447	months	1281	finaly	339	yey	178	nevermind	161	searching	160	yessss	106	yesss	83
1102	horrible	13388	feel	10082	awful	3938	bad	3619	feels	3380	terrible	2339	ugh	1932	worse	1217	absolutely	1022	nightmare	288	horribly	208	migraine	173	absolutly	85
1451	people	12111	complain	4567	complaining	3069	author	2648	stop	2647	unknown	1721	rant	1243	whine	1121	shouldn't	908	bitching	751	whining	702	annoying	510	quit	490	hearing	476	constantly	382	honestly	298	personally	239	fed	210	vent	183	pathetic	173
1100	question	15109	answer	9614	matter	6943	inbox	6183	dare	5913	honest	5737	put	4835	questions	4787	completely	3735	full	3720	hours	3561	crazy	3457	honesty	3411	wrong	2372	honestly	1480	asked	993	policy	329	awkward	265	completly	191	reply	177
1101	mission	8672	complete	5029	accomplished	2812	phase	2298	completed	2047	ego	1952	operation	1765	task	1554	successfully	1120	impossible	901	successful	785	success	722	boost	654	accomplish	544	collect	453	commence	408	failed	372	rescue	327	confidence	265	managed	222
902	xa	65000
903	:	14561	hahaha	7736	hahah	5447	hahahah	2012	mobile	1463	;	1401	www	890	web	883	messenger	640	>:	429	iphone	408	lite	340	btw	167	bb	103	amp	95	ahhhhhhh	47
1849	awesome	5705	tony	5395	tron	2623	punk	2269	legacy	1762	epic	786	hardcore	757	badass	681	soundtrack	453	amazin	382	original	254	ftw	233	homo	188	excitement	166	rave	147	parker	100	montana	86	sooooooooo	78	pun	73	steam	63
1848	i'm	21375	don't	15747	mess	5104	i've	4887	that's	4211	i'll	3723	cuz	1483	i'ma	1436	whoa	227	messing	196	wreck	178	confess	132	cursed	76
906	billy	5111	henry	4476	joel	2206	david	1818	dream	1717	madison	1685	men	1334	mays	959	dangerous	850	act	775	equally	580	ward	460	ford	391	minds	366	remedy	153	graham	150	adventures	124	lawrence	93	rollin	80	caps	58
907	sitting	7557	front	6863	sit	6291	chair	5767	seat	4340	porch	2163	row	1738	seats	1633	sat	1632	computer	1424	table	1388	rocking	1084	chairs	997	desk	882	corner	773	bench	756	sits	754	feet	720	belt	706	bus	667
904	fear	22154	afraid	2110	courage	1913	death	1706	fears	1512	confidence	1075	unknown	873	brave	703	absence	703	biggest	673	experience	631	strength	623	clear	586	doubt	526	gain	472	losing	457	facing	374	doubts	332	conquer	329	rejection	307
905	calm	6391	cool	5076	stay	2870	nerves	2487	bet	2198	nerve	2171	storm	1976	hah	1003	fine	769	jeez	573	stressed	421	relaxed	413	settle	410	someones	288	peaceful	283	he'd	256	blind	229	ahhhhh	210	we'd	158	raging	132
1843	life	21420	purpose	7963	meaning	6170	one's	1861	existence	1492	meaningless	991	serve	862	continue	615	simply	494	lived	455	search	424	direction	412	inspiration	375	meaningful	352	consists	341	discover	336	sort	275	served	247	significant	220	worthy	219
1842	chance	18215	give	8364	matter	2523	choice	2479	chances	2360	change	2149	giving	1819	opportunity	742	destiny	600	chasing	550	deserves	531	prove	513	leads	417	lifetime	368	waited	341	risk	278	passing	271	achieved	244	slim	234	grab	234
1841	de	12573	mayo	2799	cinco	2090	chad	1251	tour	754	fiesta	656	mexican	501	france	427	direction	412	leon	294	barbara	217	margarita	160	feliz	150	margaritas	146	clinic	136	celebration	126	dos	107	lewis	103	alexis	93	hahahahah	90
1840	bird	12267	birds	5951	fly	2554	window	1829	flying	1580	flew	1416	worm	1244	nest	1242	mouse	606	cage	458	owl	328	poop	317	wings	308	wing	302	squirrel	249	bees	234	worms	227	catches	197	attacked	194	feeding	194
1847	justin	20141	bieber	10228	beiber	3151	fever	1143	singing	585	csi	377	usher	335	haircut	219	obsessed	210	artist	187	singer	166	eminem	149	commercial	142	generation	135	sings	132	rofl	122	moore	119	canadian	111	drake	104	fag	95
1846	taking	16631	dot	2843	advantage	2094	easy	1356	chances	1092	piss	894	takin	755	granted	718	destroyed	546	toll	526	personally	490	momma	474	connect	460	handle	459	advice	455	poll	402	dare	365	grown	323	relationships	316	quizzes	280
1845	hrs	13588	mins	9050	min	5093	hr	4313	left	2719	sec	1537	spent	1149	ago	676	straight	580	worked	547	total	275	minus	242	wk	235	counting	226	atleast	195	waited	142	wrk	133	lasted	120	ot	115	longest	109
1844	don't	9150	pet	4361	pets	2377	talk	2208	that's	1915	stay	1894	walk	1876	visit	1460	complain	1449	pillow	1097	animals	1013	clothes	916	hairy	810	homes	669	short	657	owners	633	babies	608	furniture	589	biggest	570	chances	477
1908	i'm	12686	it's	8836	i've	6271	don't	6086	lost	3341	mind	2165	quarter	1963	wouldn't	1799	anymore	1216	control	1164	reason	729	century	413	figure	380	cross	320	floor	289	reaching	243	bringing	138	geez	71
1909	ive	23528	im	9358	decided	1873	missed	1792	alot	1622	havent	1523	ill	1115	heard	866	realized	780	awhile	594	realised	554	noticed	456	youve	435	conclusion	356	hasnt	332	havnt	278	wasnt	238	couldnt	238	atleast	225	wouldnt	202
1906	fb	7981	child	6665	change	6145	abuse	5958	fight	5845	face	5724	picture	5692	join	5610	monday	5591	human	5478	goal	5230	childhood	4849	cartoon	4598	profile	4512	december	4271	invite	4036	copy	3230	paste	2994	dec	1419	sam	1145
1907	fire	14575	burn	4110	burning	3804	flame	2870	burns	2589	flames	2423	light	2139	set	1209	desire	1144	burned	1132	burst	978	fires	914	lit	780	ashes	716	match	687	spark	621	fuel	581	higher	534	passion	507	wood	507
1904	happen	12547	things	11227	make	10748	living	1517	thinking	1413	happened	1286	miracles	1198	important	1032	noise	736	follow	645	waste	617	results	583	wonders	551	voice	523	trapped	516	opinions	507	kinds	455	limited	437	drown	368	courage	291
1905	mail	6012	package	2940	waiting	2338	office	1905	delivered	1758	arrived	1666	ordered	1550	box	1159	delivery	1034	deliver	1007	order	858	received	782	arrive	615	ups	612	signed	538	recieved	442	amazon	434	checked	403	passport	325	address	294
1902	facebook	13096	picture	7506	change	7253	childhood	7047	memories	6662	human	6396	profile	6342	monday	5893	cartoon	5877	faces	5737	invite	4997	violence	4953	invasion	4516	children	4313	character	3216	campaign	2269	dec	2266	december	2106	child	1105	characters	653
1903	garden	11491	flowers	6809	flower	4925	olive	2870	plant	2087	grow	1610	plants	1451	rose	1377	bloom	1076	planted	1046	spring	986	growing	653	weeds	632	seeds	592	dirt	573	gardens	501	grass	498	trees	492	yard	469	roses	355
1900	rachel	5717	ow	5391	lauren	4715	emma	3935	watson	847	misses	427	katie	338	danielle	323	emily	285	sleepover	280	jordan	252	heather	174	ralph	174	chloe	161	laura	160	rebecca	154	bff	146	eric	144	olivia	137	christine	135
1901	word	13598	spread	3520	sit	2214	top	1911	advice	1888	standing	1692	cry	1640	jump	1473	eating	1321	screaming	1271	wise	1176	flip	1149	teens	942	sky	853	edward	807	pop	752	twilight	713	robert	711	cullen	641	heard	602
854	success	16111	failure	7265	key	2697	successful	1991	happiness	1648	failures	1605	succeed	1266	fail	913	opportunity	724	huge	563	preparation	524	option	507	effort	505	ability	484	enthusiasm	476	measured	468	determination	461	achievement	446	defeat	435	humble	427
855	world	14191	wouldn't	6014	trade	4017	cafe	2498	isn't	1357	wouldnt	1172	nonsense	864	interesting	665	center	532	chosen	422	places	342	thin	323	represent	313	wise	240	remaining	235	spice	215	tall	215	counts	211	average	211	steal	205
856	desire	5231	world	4736	hunger	1620	satisfied	1596	fire	1266	satisfy	988	incredible	646	desires	623	heart's	560	wanting	548	content	533	improve	477	longing	469	difficult	425	torn	424	favor	412	useless	388	reach	381	destruction	370	satisfaction	349
857	happy	43093	birthday	29302	wishing	1491	daddy	962	mommy	828	brother	787	belated	640	dearest	551	advance	461	mama	394	momma	279	beloved	272	papa	177	returns	121	greet	103	sweetheart	84	meeee	81	meee	74	mwah	57
850	wanna	33493	don't	31669	stay	1375	touch	895	hear	783	lonely	202	babe	201	undo	161	blew	108	stole	91	explode	90	surrender	76	stare	58	brag	47	consuming	42
851	word	21113	comment	13482	friends	11249	leave	10570	copy	10149	status	9921	post	6080	met	5079	wall	5052	fb	4858	paste	4527	list	4506	describes	4307	let's	3636	letter	3268	task	3155	amazed	3029	interesting	2716	here's	2563	results	1715
852	moms	4922	mom	2832	late	2258	nights	2094	early	2075	showers	1972	gave	1910	bags	1879	dark	1874	mornings	1859	helping	1556	quick	1454	wouldn't	1386	traded	1359	return	1317	salon	1258	circles	1202	designer	1190	expect	1148	aren't	1094
853	pig	5275	rat	2777	cage	2646	snake	2308	hamster	1537	pet	1509	elephant	1453	pigs	1369	rats	1319	cat	1092	mouse	884	mice	783	snakes	710	named	654	caught	602	rage	469	tail	461	rabbit	405	tiny	350	nicholas	341
858	radio	13887	listening	4980	music	4003	listen	3662	pandora	3262	song	3067	fm	2911	heard	2655	station	2637	tune	1774	songs	1774	playing	1666	stations	627	played	626	dj	541	plays	458	listened	426	hearing	261	local	261	bbc	239
859	jason	8495	concert	877	kelly	401	eric	259	bryan	225	luke	211	austin	204	terry	188	mel	155	li	148	identity	100	badass	75	arnold	69	peed	53	remedy	31
6	forward	17822	lookin	11937	ward	2042	marcus	1304	foward	878	seein	482	tonite	456	catching	302	tommorow	230	tomorow	210	messy	172	wi	145	girlies	137	tommorrow	120	movin	99	cookin	88	hopin	81	infinity	60	morn	51
425	lol	17325	lo	10319	haha	4456	didnt	2754	soo	2341	dang	942	ahhh	913	forgot	794	hmm	776	geez	720	ahhhh	314	lastnight	273	gosh	220	#N/A	191	fyi	156	welp	76	remembered	59	uhh	37	remeber	33
740	girls	26396	guys	17798	guy	2928	girl	2418	boys	1574	jerks	717	flirt	599	girlfriends	533	golden	421	boyfriends	372	assholes	284	attractive	272	prettiest	257	kissing	223	dating	195	dudes	189	chicks	182	confusing	155	jerk	149	hottest	146
741	jus	2814	smh	2740	wit	1880	ppl	1802	aint	1485	bout	1352	lmao	1352	ima	1346	dis	1227	mad	931	sum	901	sm	887	gettin	876	dnt	837	rite	803	imma	682	tryna	657	needa	617	skool	608	duh	608
742	yay	11279	tomorrow	7866	weekend	4470	woohoo	3704	sniff	3044	yippee	1666	yipee	688	exciting	500	hooray	295	woohooo	285	disneyland	241	pumped	220	hurray	214	babysitting	181	:o	153
743	head	29111	feels	3362	inside	3095	explode	2778	voices	1762	spinning	1410	thoughts	1241	heads	1189	voice	882	pounding	809	shaved	754	ache	652	brain	551	shaking	529	shakes	520	tells	504	shave	497	bald	487	heels	389	popped	367
744	san	17672	diego	5132	francisco	2788	antonio	2719	jose	2310	juan	1583	ca	776	california	440	downtown	237	tx	214	bay	208	austin	199	anne	187	fiesta	170	carlos	160	sd	155	classy	133	lucas	130	disneyland	124	cal	99
745	breath	12195	breathe	8396	deep	8053	air	3627	breathing	2654	hold	1838	holding	1145	barely	948	takes	864	inside	788	catch	726	lungs	717	oxygen	670	chest	476	choose	459	breaths	401	calm	389	dying	385	deeply	214	bleeding	182
746	past	21607	future	14941	present	10300	moment	2768	live	2472	express	1067	dwell	946	gave	819	single	761	allowed	709	afraid	673	freedom	643	concentrate	586	wasn't	586	idiots	567	fallen	561	village	549	worry	523	gratitude	519	soldiers	480
747	love	54140	TRUE	6569	unconditional	1607	lust	774	pure	718	unconditionally	530	affection	410	emotion	268	romantic	260	sight	257	sacrifice	257	love's	239	dies	222	lover	215	essence	212	waits	200	tender	191	eternal	176	experienced	126	definition	124
748	day	17880	today	16232	yesterday	5182	hoping	2128	productive	846	eventful	611	absent	226	needless	20
749	xa	44328	don	3851	ll	2939	ve	2877	:\	1443
1050	hospital	5723	results	2906	doctor	2861	blood	2740	test	2015	doc	1783	dr	1676	scan	1592	tests	1547	doctors	1306	er	1237	ct	1161	surgery	882	normal	744	pressure	693	cm	686	medical	672	appointment	621	meds	606	nurse	575
1051	y'all	7873	doin	6384	yeah	3214	hey	3066	todd	2337	how's	980	swear	797	livin	424	hows	379	drake	159	i'ma	146	sheesh	112	demon	93	thang	58	askin	57
1052	great	5995	luke	3415	ready	2641	jesus	2239	nation	1808	signs	1645	quickly	1645	sad	1555	places	1540	ny	1365	kingdom	1316	jan	1289	sept	1224	march	927	events	849	heaven	849	japan	839	behold	755	showing	751	rise	706
1053	thing	22842	i've	4387	funniest	3447	heard	2976	sweetest	1777	ive	1565	cutest	1402	possibly	1277	coolest	1245	easiest	1095	eve	911	stupidest	686	saddest	626	craziest	624	fell	586	dumbest	551	weirdest	508	nicest	460	strength	374	smartest	297
1054	back	28815	reality	9816	real	1354	escape	1092	caught	989	snap	449	vacation	439	fantasy	426	harsh	391	perception	281	sets	273	virtual	224	champagne	187	hits	182	stab	160	someday	148	beneath	145	sadly	136	grip	102	bites	91
1055	ride	21685	bike	17669	riding	8479	horse	6858	rode	2846	horses	2327	motorcycle	1577	bicycle	1515	bikes	1410	rides	1008	mile	917	miles	782	trail	718	dirt	643	pony	629	wheels	487	stole	478	ridin	409	helmet	368	cowboy	352
1056	ah	27748	joys	1978	ooh	1590	ahh	1557	ting	911	ahhh	784	bang	386	wel	385	oo	242	ohh	202	nostalgia	179	ban	178	ahhhh	172	insomnia	160	aha	159	aa	138	refreshing	61	ina	56
1057	facebook	10497	chat	5239	:/	4250	signed	2956	uk	2718	http	2302	org	2134	www	1610	cc	1321	tiny	853	wikipedia	777	sign	514	access	500	site	442	pe	422	id	404	msn	340	ryan	289	logged	243	chatting	235
1058	lol	9006	nah	7342	haha	5419	hahaha	2656	kidding	1695	hahah	1689	hah	1210	lmao	945	yah	930	eh	683	hahahaha	677	hmm	602	jk	552	hmmm	519	naw	494	nevermind	423	aww	376	joking	360	nope	279	aw	192
1059	evil	19623	resident	2821	root	849	devil	726	pure	541	grin	460	spirit	411	genius	368	triumph	335	nonsense	299	beware	298	overcome	292	insert	284	destroy	280	prevent	258	forces	257	twin	215	romans	205	twisted	203	despicable	179
1696	step	24235	closer	5593	steps	5198	forward	4643	taking	2546	move	1432	ahead	1333	moving	1177	direction	601	decide	358	backwards	334	leap	276	giant	256	foward	244	edge	240	repeat	199	stepping	181	knocked	181	farther	173	ties	115
1697	nite	34993	bed	4154	fb	2959	tonite	2525	gud	2264	goin	1556	al	971	gd	690	peeps	599	mornin	525	rite	285	goodnite	283	gona	243	wrk	203	facebookers	195	callin	170	morn	147	mite	147	nighty	131	;-	118
1694	ray	5545	charles	4386	prime	2984	marilyn	1827	mortal	1429	minister	1163	monroe	947	lewis	347	rib	332	allen	323	transformers	282	lover	268	rachel	251	combat	224	thrill	210	johnson	202	freeze	191	william	182	ban	168	raw	160
1695	xa	18725	ll	943	don	563	ve	374
1692	da	30857	dum	4106	dee	3094	di	1107	dah	862	ba	636	ar	626	ra	336	du	301	duh	209	ai	181	ver	106	xo	78	allll	68
1693	find	14639	finding	10247	hard	10130	difficult	3503	impossible	2045	easy	1336	nemo	1303	search	745	ways	705	searching	606	harder	429	decent	402	answers	387	finds	336	limits	273	concentrate	261	struggling	250	discover	237	loosing	187	frustrating	167
1690	:p	31954	:d	8509	;	1835	hah	915	btw	396	hehe	389	;p	313	hahahaha	283	^_^	258	hehehe	199	:|	182	8	148	>:	97	xo	72	hehehehe	69	xxxxx	61	:-/	60	xxxxxx	51	lease	38
1691	ankle	5848	knee	3624	hurts	3417	foot	3396	broke	3267	hurt	3061	broken	2937	leg	2748	wrist	2256	sprained	1861	arm	1691	surgery	1663	bone	1569	fell	1352	twisted	1329	cast	1226	hospital	1058	brace	1038	swollen	1035	doctor	922
715	find	35113	can't	14810	confidence	643	bet	570	wipe	542	motivation	496	frustrated	303	tear	217	hiding	202	understands	181	remote	176	unable	146	nothings	142	excuse	139	wandering	43	specially	30	youll	24	motto	17
1698	lunch	12115	dinner	9270	breakfast	7995	eat	6355	ate	6009	eating	3769	sushi	1319	food	981	meal	952	yummy	905	table	878	subway	809	hungry	775	steak	542	cooked	517	supper	487	delicious	458	pizza	451	cafe	437	mcdonalds	431
1699	beautiful	22398	day	18020	morning	3659	sunrise	1822	sunset	1685	neighborhood	1537	wonderful	1384	enjoy	1340	enjoying	751	gorgeous	617	peaceful	386	neighbor	379	glorious	242	snowy	138	autumn	119	spectacular	109	mountains	102	everythings	82	everything's	80	hike	77
1278	moment	23814	awkward	7562	dave	5085	silence	1777	dull	948	moments	816	shot	579	opportunity	541	lifetime	449	capture	407	realise	400	blonde	395	slip	357	exact	353	embarrassing	310	situations	223	pause	220	clay	123	noah	109	blond	106
1279	anna	4790	laura	3771	katie	814	catherine	744	nicole	561	emily	513	marie	455	smith	414	elizabeth	396	sophie	393	sleepover	380	ashley	372	misses	359	maria	345	victoria	343	paige	321	hangin	303	sara	295	erin	286	alex	270
618	michelle	2992	courtney	1964	hanging	1817	kelsey	1500	amanda	1013	mitchell	970	mason	935	austin	575	mall	451	alex	413	kayla	411	nicole	404	emily	401	sarah	384	lynn	381	hangin	376	ashley	358	heather	343	cousin	339	chelsea	336
619	xd	20556	matter	3628	doesn't	760	doesnt	192	outcome	18
1270	la	47946	lala	1350	viva	1344	lalala	1281	fa	1049	vie	984	c'est	614	ooh	606	ga	481	vida	475	ra	465	tis	247	vi	223	livin	196	fitness	107	singin	100	ink	96	bam	80	jolly	79	vid	59
1271	scary	9426	activity	8337	movie	7583	paranormal	6231	watching	4534	watch	3762	watched	3350	movies	3238	scared	2087	creepy	844	horror	685	nightmares	576	scare	568	scariest	558	film	555	freaky	540	freaked	521	activities	346	disturbing	227	trailer	186
1272	didn't	29257	realize	5654	missed	2421	notice	2011	expect	1555	realise	1232	apparently	1149	knew	1031	case	761	wanted	645	chance	517	supposed	460	upset	452	existed	401	oops	303	honestly	211	warn	186	bummed	185	excuse	176	disappointed	173
611	im	19749	goin	5704	sayin	3724	doin	3338	somethin	3333	jus	3198	gettin	2543	tryin	1998	cuz	1792	makin	1348	lookin	987	nothin	855	startin	852	thinkin	850	waitin	803	takin	677	movin	618	outta	517	comin	514	sittin	475
616	minute	7068	loved	6580	born	5270	knew	5172	die	3795	put	3416	children	2816	face	2710	wanted	2253	child	1879	fell	1698	walk	1680	body	1480	choose	1465	hour	1421	miracle	1297	decision	1091	heard	894	conscious	773	pregnant	545
617	xa	48416	bob	371	coloring	29
1276	def	5081	lo	4853	nicki	2836	nikki	2631	minaj	1872	alexander	1414	lmao	614	hype	601	drake	536	smh	493	kim	474	fav	309	btw	284	ft	281	ummm	203	barbie	191	definately	155	obsessed	122	rap	105	wifey	80
615	screw	10438	screwed	3918	damn	2720	pissed	2543	messed	2232	totally	1841	sucks	1467	freaking	1408	>:	1326	crap	1057	jolly	924	screwing	689	schedule	659	fml	521	fucked	491	ruined	490	completely	460	argh	408	badly	369	effing	362
711	life	27472	sucks	5244	isn't	3864	exciting	2717	unfair	1781	fair	1588	isnt	1503	finding	1159	confusing	957	creating	754	lead	283	constantly	247	unpredictable	201	contemplating	103	hows	57	satisfying	53	u've	48
710	time	42854	spending	5211	spend	3614	consuming	681	waste	463	wasting	409	waits	158	crunch	157	gather	102	heals	98	waist	87	essence	82	wisely	55
1491	front	5957	deny	5584	jesus	4766	christ	4205	show	3532	father	3485	wall	2907	bible	2896	afraid	2591	simple	2386	ashamed	2380	heaven	2317	peers	1792	challenged	1761	test	1730	gates	1675	believers	1454	repost	1178	ignore	1129	savior	908
1472	da	14866	dat	11304	wit	6758	dis	5734	dey	4877	aint	4248	jus	3217	cuz	3157	bout	3135	wat	3047	kno	2930	nigga	2393	dnt	2388	sum	2320	dem	2051	den	2014	wen	1982	ppl	1756	dats	1595	yall	1590
1473	i'll	28274	guess	5407	wink	3086	anytime	1309	swear	854	shoulder	658	hug	535	shadow	522	settle	436	that'll	397	pillow	347	damned	336	awhile	263	love's	147	cryin	58
1470	door	24584	front	4406	knock	3854	open	3461	opens	3311	opened	3208	closes	2545	closed	2317	knocking	1795	knocked	1189	walked	993	knocks	949	happiness	929	shut	916	asks	853	naked	776	window	740	clothes	611	arms	574	scam	486
1471	thought	16874	id	8501	knew	3583	wow	3045	guess	2427	didnt	2261	looked	1532	found	1479	apparently	1142	woulda	778	turns	727	nope	646	you'd	369	would've	346	figured	229	guessed	225	huh	214	they'd	120	werent	119	counts	110
1476	gosh	12355	darn	5588	dang	2369	soo	1304	freaking	1198	ohh	944	soooo	703	freakin	656	>:	614	grrr	390	confusing	377	annoying	355	-.-	306	geez	295	stinks	294	gee	233	>.<	230	d:	227	gah	213	ahhhh	208
1477	judge	11790	don't	10855	cover	2813	judged	1257	define	1217	judging	1139	character	552	quick	538	actions	455	cheap	445	opinion	430	intentions	424	offense	387	shouldn't	373	judgement	349	they'll	331	based	311	people's	288	assume	276	judgment	264
1474	xa	80066
1475	tongue	5487	mouth	4856	taste	4835	lips	3302	bite	2899	spit	1906	lick	1445	swallow	1408	numb	1247	chew	812	tip	780	teeth	727	buds	664	hips	617	burnt	581	tied	544	biting	525	stick	514	tastes	447	nasty	367
1478	movies	12925	movie	12341	watch	9735	watching	8612	netflix	2948	horror	2728	scary	2347	watched	2088	films	1243	film	1164	watchin	914	marathon	874	classic	872	romantic	848	rated	742	instant	561	dvd	557	suggestions	487	rent	465	popcorn	449
1479	ball	19936	balls	4032	play	2664	hit	2447	crystal	1549	throw	1088	curve	933	golf	866	tennis	852	basket	836	dodge	734	rolling	668	curl	628	throwing	617	played	545	drop	544	throws	544	threw	447	dropped	424	swing	412
1304	happy	39844	birthday	26249	wished	7427	wishing	2095	b-day	1602	thankyou	263
1305	remind	8298	i've	7620	wall	6006	status	5971	challenge	5602	post	5477	thing	5444	i'll	4865	favorite	4248	learned	3668	wondered	3304	memory	3219	seconds	3024	animal	2882	color	2770	weird	2689	nickname	2127	repost	832	8	735	shirt	620
1306	officially	18387	summer	3806	started	3139	yay	2700	decided	1515	begun	1396	vacation	1266	offically	1247	moved	1172	woohoo	760	official	747	begin	381	registered	241	certified	231	announce	223	declare	218	teenager	200	began	198	owns	131	approved	113
1307	sleepy	11117	sleep	9557	tired	6168	yawn	3696	zzz	2463	-_-	1913	zzzz	1768	nap	1495	zzzzz	1423	sleeping	843	-.-	684	bedtime	420	hollow	291	stretch	239	soooooooooo	77	nyquil	32
1300	thought	11698	didn't	4668	guess	3617	found	3124	turns	2246	wrong	1972	knew	1783	wasn't	1635	wanted	1514	realized	1505	couldn't	1476	checked	1420	heard	1118	turned	1028	decided	974	earlier	672	realised	609	nope	599	pleased	524	sounded	501
1301	sea	7569	ocean	5541	ship	3882	waves	2569	boat	2560	water	2443	deep	2141	swim	1893	sail	1809	sailing	1475	wave	1462	waters	1265	sink	1161	sinking	1132	drowning	1127	blue	977	seas	890	river	875	drown	837	shore	796
1302	week	33170	finals	7823	shark	2337	end	2208	stressful	834	nxt	732	wee	698	classes	648	mock	549	longest	518	semi	451	exams	435	midterms	348	highlight	234	sharks	231	stressing	225	tests	190	survived	186	dedicated	133	throws	99
1303	wa	5199	ni	4130	wo	2825	ga	2211	ai	1362	mo	1101	yo	897	ne	578	japanese	382	ima	319	shite	204	demo	202	baka	113	ama	113	mata	107	leo	104	des	104	koi	103	ano	96	aa	89
1308	lead	8967	path	7814	walk	6884	follow	4651	ralph	2560	waldo	2159	front	1028	trail	936	leads	892	leading	831	direction	784	emerson	727	guide	674	chosen	660	roads	516	lived	462	paths	438	destiny	432	singer	385	easier	380
1309	happiness	11092	peace	8200	joy	6458	bring	4430	year	4406	health	2663	filled	2113	brings	2097	prosperity	1156	wealth	1131	wishing	1096	blessings	963	success	888	share	721	laughter	661	fill	636	spread	432	spirit	432	essential	345	harmony	341
498	land	12235	place	1771	hand	1396	desert	1311	promised	759	disney	633	sea	604	lala	493	travel	448	magical	347	exit	326	dry	325	foreign	260	enter	246	sand	234	returned	230	lands	229	adventure	223	egypt	221	asses	214
499	<3	128525
494	mind	11299	lose	10355	losing	7315	lost	5861	control	3521	sight	2836	loose	1578	loosing	1298	sanity	827	grip	687	temper	583	ability	565	wanting	490	interest	395	slowly	374	discover	266	dignity	237	educated	216	courage	208	entertain	176
495	im	35791	gonna	19238	survive	176	strongest	167	intelligent	146	addicted	137	species	109	grounded	91	outa	46	nothings	12
496	check	37814	fb	2284	account	2252	setting	1436	secure	1336	box	1164	hacked	1126	security	1114	session	1066	click	1015	ou	1005	address	721	save	652	url	593	reality	577	background	571	huge	548	settings	545	screen	434	wreck	426
497	crazy	5468	funny	5208	amazing	3765	beautiful	3729	wild	3531	rate	3216	strong	3149	dumb	3126	cute	3054	sexy	2933	goofy	2717	spoiled	2642	sarcastic	2640	8	2536	brave	2395	talkative	2197	lovable	1963	mouthy	1183	awesomely	1012	ghetto	809
490	=	678	=	518	:\	322	miley	167	bieber	116	swift	105	teens	91	jonas	89	fl	89	cyrus	87	montana	43	linkin	42
491	urge	4753	sudden	4091	easily	3395	resist	2175	temptation	1758	amused	1684	tempted	1176	suddenly	785	strange	772	inspired	689	ways	565	overwhelming	516	distracted	459	enjoyed	451	entertained	409	avoid	375	rid	369	touched	325	shout	305	faithful	266
492	shower	21304	baby	11348	taking	2463	meteor	1720	millionaire	764	hop	666	dressed	609	brb	370	showers	339	bathroom	271	workout	264	takin	263	shave	224	towel	180	naked	176	sister's	131	sweaty	111	stink	100	peak	95	invites	88
493	car	29926	wash	3728	drive	2875	ride	2044	sticker	1730	bumper	1590	washed	1450	driving	1387	fixed	1334	cars	1199	seat	1082	window	1034	crash	843	windows	589	windshield	534	cleaned	523	rides	503	truck	436	trunk	429	drove	376
24	nurse	4025	iv	2299	helping	1438	means	1398	lives	1345	missing	1199	begin	1112	nurses	963	worst	954	curse	869	holding	849	minute	823	step	809	dying	765	people's	756	carry	711	difference	696	story	693	authority	619	appreciation	616
25	taylor	14868	swift	4599	elizabeth	2898	gang	2484	kanye	663	rip	601	beyonce	543	liz	530	corey	458	album	317	cd	223	obsessed	200	jonathan	146	samuel	139	christine	115	erin	86	lucy	75	roomie	64	lawrence	61	fifteen	54
26	friends	13022	cousins	8710	family	6024	crazy	4770	understand	2456	talk	1775	haven't	1108	childhood	1050	talked	1031	cousin	1004	older	892	grow	802	re-post	675	repost	671	daily	437	remain	238	siblings	202	they'll	153	haven	152	regular	143
27	mexico	5249	el	3066	ay	2097	viva	2085	te	1986	del	1486	amo	1222	mexican	540	mar	492	argentina	402	ii	370	spanish	354	mucho	350	fiesta	286	amigos	253	spain	229	pit	213	chile	200	france	112	brazil	108
20	sister	6079	niece	5124	nephew	5057	loves	4538	aunt	3490	nieces	3335	nephews	3023	secrets	1484	auntie	1267	mother	1262	mommy	1078	hugs	1058	neice	994	sisters	600	babysitting	580	adorable	563	aunty	546	sis	522	behave	520	cutest	228
21	high	20340	low	12359	head	3424	hopes	3213	held	1361	heels	1115	aim	919	expectations	621	standards	562	key	483	reach	397	maintenance	378	heads	359	spirits	352	danger	309	lower	297	tolerance	261	quality	225	budget	212	behold	202
22	ill	29747	im	10061	guess	8215	fine	741	idk	367	admit	268	itll	246	mayb	231	settle	145	untill	144	tomorow	110	idc	67
23	night	26125	sleep	5455	nights	3474	sleepless	2473	twas	1015	rough	353	seattle	272	dreamt	271	creature	267	eventful	131	gooood	115	wrecked	37
28	xbox	10477	ps	7939	play	5819	playing	5123	live	3529	games	2984	cod	1914	online	1318	wii	1156	playin	1089	add	1012	pc	512	gaming	512	fifa	492	tag	392	halo	391	microsoft	344	sports	325	sony	229	slim	216
29	ta	7179	ma	2607	li	1754	il	1647	min	674	te	542	bo	535	pa	500	cu	440	imma	438	mal	303	su	292	nan	198	tin	192	den	165	ra	159	par	152	bi	151	chin	150	dar	146
7	weekend	17377	awesome	11905	amazing	8245	great	8106	retreat	2242	couples	490	cheers	359	buds	93	flippin	46
446	children	16742	child	12990	parents	10245	kids	4065	parent	2772	mother	2260	understand	1158	mine	1048	adults	977	grown	860	adult	844	front	831	train	741	teach	722	young	586	bullet	565	father	457	babies	392	sacrifice	387	children's	364
591	full	24345	moon	12466	surprises	1845	sailor	1128	circle	840	blown	774	swing	637	harvest	595	belly	535	wolf	288	rocket	284	pocket	194	drunken	169	wolves	159	length	142	autumn	121	potential	121	moonlight	109	awesomeness	105	spoon	102
590	person	3525	kind	2319	smart	2305	intelligent	2003	beautiful	1848	loving	1606	sweet	1543	funny	1538	caring	1432	personality	1355	extremely	1287	dies	1266	talented	985	shy	946	strong	926	loyal	886	honest	830	confident	824	friendly	793	sexy	785
593	=	14934	=	2720	hah	1264	#N/A	706	p	222	passing	169	def	161	yayyy	136	jesse	134	nicely	96	suspended	72	goooood	65	inform	59	owns	55	records	50	attended	42
1876	:	57742	exited	62	girlies	31
1877	found	23406	lost	13735	find	7991	searching	2012	wallet	1246	search	700	closet	622	looked	609	hiding	461	returned	283	hidden	267	treasure	252	surrounded	236	hobby	193	hid	193	map	176	lying	172	reward	153	insecure	144	haven	139
1874	brittany	3840	eddie	2474	murphy	2092	hanging	816	rip	576	cousin	526	hahah	485	bro	395	nicole	365	clueless	254	amazin	250	hangin	228	spears	212	baker	162	kenny	147	britney	134	miller	130	pat	119	homies	98	tara	97
1875	god	14421	gave	11044	world	3598	son	3570	loved	3463	john	2888	believes	1310	father	887	jesus	883	eternal	768	greater	764	save	749	gift	726	saved	463	beloved	395	showed	390	sacrifice	334	lay	311	believed	295	bible	293
1872	big	2821	that's	2606	told	2077	cool	1974	sexy	1686	he's	1573	car	1534	heads	1527	roll	1490	ran	1391	table	1157	line	1089	leader	1080	bird	922	hole	920	lunch	855	sang	775	yelled	762	bathroom	724	danced	719
1873	english	6254	speak	5802	language	5070	spanish	4995	french	4671	german	3393	japanese	3330	italian	2234	speaking	1994	chinese	1909	learn	1768	russian	1768	korean	1257	accent	1253	greek	1227	languages	1126	foreign	1122	indian	1073	learning	1064	latin	1005
1870	made	11552	crazy	4864	brother	4568	picked	4459	stuck	4122	laugh	3717	watched	3683	drove	3637	strong	3015	succeed	2872	cheered	2254	fall	2122	hugged	1988	fail	1682	sister	1393	paste	1375	pulled	1078	punched	1033	brother's	1027	mad	955
1871	jacob	6431	edward	6198	twilight	4297	bella	3560	team	3303	vampire	3197	moon	1962	vampires	1794	eclipse	1456	cullen	1454	sparkle	556	fans	437	hotter	376	shirt	363	saga	359	obsessed	255	glitter	234	wolf	228	scene	204	forest	189
595	heart	5644	put	5404	broke	3327	rest	3311	stay	3217	stopped	2939	takes	2911	hard	2909	working	2770	hands	2663	pass	2531	beating	2438	prove	2402	loved	2309	golden	2202	arms	2033	eyes	1977	heaven	1965	watched	1865	dearly	1802
1878	letter	11778	letters	5925	write	4029	writing	2142	word	1889	wrote	1864	read	1338	send	1216	mail	1111	cover	1080	acceptance	865	written	825	juliet	733	received	709	capital	637	describe	620	sending	539	resume	496	chain	377	address	375
1879	feeling	22389	feel	5398	bit	3330	sick	2467	kinda	1838	crappy	1091	refreshed	883	felt	734	relaxed	702	icky	672	poorly	598	yucky	564	alittle	458	rough	436	feelin	373	wel	356	rested	258	inspired	237	drained	199	nostalgic	187
977	give	35860	crap	2834	shit	2795	ton	2439	receive	2273	smile	2237	woman	2166	greater	1988	meal	1873	groceries	1559	sperm	1447	she'll	1210	agree	876	female	281	prepared	258	sh	169	recieve	127	compliments	63
976	end	16176	beginning	6614	ending	5480	story	2319	cycle	1619	stories	1208	ends	1201	knowing	1148	middle	1038	endings	862	begining	845	beginnings	825	chapter	785	clear	600	circle	537	ended	418	vicious	383	happily	297	rhyme	242	pretending	231
975	dont	42714	care	8614	understand	4190	anymore	3622	worry	1520	bother	1455	talk	1176	doesnt	745	kno	500	judge	484	expect	360	act	312	honestly	221	wana	199	pretend	134	frankly	101	someones	94	everythings	76	anyones	41	advise	23
974	english	8319	pirate	6607	language	4911	facebook	4767	click	3254	bottom	2875	page	2200	stopped	1532	blue	1403	you've	1375	laughing	1319	scroll	1275	corner	1266	changed	1251	appears	1207	letters	1179	pops	991	box	983	selection	813	ye	769
973	sign	6773	jan	3029	nov	2655	signs	2517	dec	2239	oct	1734	feb	1717	zodiac	1681	horoscope	1373	aug	1370	leo	1182	sept	1088	june	942	changed	927	march	844	july	826	april	716	born	707	dates	313	daily	311
972	ready	23358	gettin	17161	outta	614	tonite	527	workin	517	nerves	502	paid	424	dressed	392	wrk	286	takin	167	headin	164	skool	158	laid	120	steady	112	welp	86	tipsy	41
971	missed	10706	rip	8930	miss	3810	patrick	3015	loved	2563	sad	2520	forgotten	1761	passed	1729	died	1424	greatly	1030	dearly	880	remembered	867	beloved	863	uncle	766	goodbye	656	neil	621	mj	557	sadly	550	harris	535	truely	297
970	tom	15951	jerry	3710	cruise	1808	petty	1045	classic	721	waits	515	jones	424	tease	281	forced	120	sailor	120	cameron	111	riddle	106	baker	88	booze	81	lewis	75	knight	72	sighs	71	register	69	goodluck	65	tommy	60
596	tiger	4041	woods	3990	stephen	3930	deer	3380	hunting	2158	buck	1635	doe	1013	equals	1010	season	708	shot	584	minus	548	fry	473	hunt	459	wife	457	wood	421	steven	357	hunter	329	golf	279	lion	238	promises	221
979	tan	2629	lee	2259	li	1069	chan	807	kim	669	chin	629	wo	567	yang	556	mei	535	le	463	wan	447	michelle	427	han	424	ting	422	chinese	420	bu	389	kevin	358	hong	332	yan	328	ai	300
978	facebook	15523	account	7905	myspace	4433	hacked	3987	email	3959	delete	2091	fb	2032	twitter	1916	deleted	1796	messages	1699	emails	1692	yahoo	1203	deleting	1103	spam	1089	add	1005	checking	950	password	926	e-mail	844	blocked	840	sending	753
182	sad	32793	happy	8350	makes	7013	kinda	1679	depressed	851	=	810	mad	763	cry	684	leaving	662	depressing	611	crying	558	panda	332	pathetic	305	:-	296	ending	293	cheer	224	endings	184	incredibly	157	:	152	realization	151
183	daniel	6392	craig	2449	tina	2275	erin	1964	turner	508	jenny	276	danny	167	evans	161	mega	103	linda	84	evan	79	assume	76	berry	67	mel	55	ronnie	40
180	dear	26669	sincerely	5376	i'd	2251	cute	1931	write	1513	letter	1144	tattooed	1065	agony	442	hugged	410	apologize	409	diary	377	hurry	364	kindly	341	inform	228	appreciated	215	greatly	210	xoxo	199	advance	180	liver	161	ruining	159
181	tennis	6026	match	4063	playing	2001	roger	1566	won	1381	played	1359	andy	1104	murray	806	table	755	throwing	743	tournament	606	holding	519	burned	486	court	459	sports	458	finals	405	grand	397	anger	380	matches	369	sets	334
186	time	21429	long	14429	short	6552	takes	4749	period	1548	slow	704	amount	666	eternity	446	toll	317	fear	307	exact	249	rejoice	192	swift	177	lifes	172	skirt	109	madness	103	process	85	waits	76	henry	65	impatient	59
187	miss	47022	terribly	985	everyday	764	=	656	dearly	424	:-	342	buddy	292	bestfriend	251	universe	225	badly	215	talks	215	seniors	188	ole	165	philippines	164	teen	140	sweetheart	119	highschool	117	:	115	=	113	youuu	112
184	plz	13962	ur	5131	ppl	3286	hey	1695	msg	1281	pray	1237	comment	923	txt	672	reply	650	ans	644	sum	609	pls	559	asap	556	coz	400	thx	387	frnds	349	suggest	347	cum	258	thnx	232	guyz	214
185	leave	20141	lets	1736	everytime	1646	cal	1612	bit	1389	rescue	1248	disaster	1085	cut	869	send	757	confirmed	690	leaving	666	shouldn't	653	earthquake	618	note	610	haiti	471	minimum	443	fund	427	owners	337	shouldnt	334	pre	324
188	woo	23910	hoo	15525	whoo	6348	boo	1762	hooo	966	wooo	954	prayer	626	january	520	allowed	502	concern	489	wo	445	offended	440	christian	413	held	391	national	376	whooo	350	built	318	offend	308	obama	304	christians	282
189	practice	21758	track	1695	swim	1287	cheer	1285	volleyball	981	softball	971	basketball	783	coach	623	practicing	557	wrestling	485	choir	431	private	416	tommorow	335	cancelled	286	pumped	278	tennis	257	guard	245	tryouts	239	target	192	tmrw	189
1919	smell	15770	smells	6924	air	1570	perfume	1467	smelling	1268	fresh	1257	stink	1137	fart	1014	smelly	805	taste	735	stinks	703	smelled	658	feet	654	spray	652	breath	609	poo	585	burnt	486	soap	456	bath	452	burning	450
1918	back	16079	work	15183	tomorrow	6442	school	5046	ready	4214	vacation	3342	monday	2001	weeks	1530	dreading	619	sigh	542	yuck	218	routine	163	grind	128
1911	de	14004	la	7154	en	6822	el	6753	mi	6543	los	5491	por	4285	se	3945	dia	3476	para	3450	con	3366	las	3318	gracias	2853	todos	2780	feliz	2723	es	2427	mas	2241	hoy	2219	mis	2140	pero	1914
1910	mood	23022	bad	7908	puts	1790	swings	1208	ruin	960	moods	900	foul	529	crappy	481	ruined	404	cheer	391	swing	364	depressed	296	grumpy	275	ina	264	shitty	219	current	216	spoil	193	ruins	165	cranky	154	bipolar	152
1913	juice	9799	orange	7887	apple	2640	drink	2150	drinking	2080	cherry	1750	soda	1709	grape	1623	lemon	1493	strawberry	1200	vodka	1183	lime	1026	pineapple	990	lemonade	794	taste	776	coconut	725	flavor	645	drank	605	berry	551	mango	541
1912	:	7691	:	2009	dayy	1858	funn	1125	soo	1071	todayy	964	goood	790	alll	538	yayy	528	:	515	=	457	gooood	395	allll	303	yayyy	276	upp	204	yesss	167	tmrw	146	lovee	126	ughhh	121	yayyyy	97
1915	;	22332	:	8418	hah	2125	:p	1808	hahaha	907	;p	625	sexy	475	;d	405	hehe	341	btw	333	hehehe	332	aha	277	cheers	258	;	197	hott	114	naughty	110	;	108	xoxo	92	goood	90	woohooo	74
1914	distance	5480	long	4062	keeping	3688	content	2046	worth	1757	close	1709	walking	1078	comfortable	946	straight	886	exception	829	loneliness	719	lived	686	we've	569	bare	562	hearts	558	remind	547	deep	534	ways	527	risk	500	lasts	483
1917	baby	26711	girl	16565	boy	3435	beautiful	3330	cousin	1529	she's	1277	congrats	1040	sister	1021	proud	827	meet	808	sweet	777	lil	711	niece	704	congratulations	686	precious	677	named	581	birth	425	cutest	422	healthy	367	adorable	332
1916	god	18143	created	6303	made	3522	image	2010	create	1624	god's	1234	creation	1201	invented	1176	creator	822	creating	701	rely	669	earth	620	purpose	607	completely	504	rough	500	gods	495	humans	434	fit	382	responsible	313	equal	300
869	start	11273	working	6624	decided	4270	finally	2883	quit	2797	job	2055	legit	2012	making	2001	started	1294	dang	840	putting	688	randomly	518	wood	325	decides	176	needa	99
868	goal	6995	goals	5130	achieve	3491	reach	3094	set	2832	greatness	1881	dreams	1472	success	1372	accomplish	1245	reaching	1230	perfection	1194	achieved	915	strive	873	reached	682	potential	635	accomplished	601	focus	592	continue	579	career	547	purpose	519
861	meet	24945	track	6190	swim	1912	remembers	1800	halfway	1538	8d	1344	greet	911	reward	718	meeting	521	creative	351	field	318	key	307	cc	295	meets	284	ther	258	ca	215	bb	199	stories	197	indoor	180	bf	163
860	spell	7810	word	3836	correct	3514	wrong	3487	spelling	2267	words	1953	grammar	1558	spelled	1360	correctly	1216	backwards	1030	apparently	864	realized	656	proper	616	errors	558	sentence	501	typing	458	properly	435	oops	337	error	328	noticed	321
863	stuck	22173	head	20795	song	9851	songs	1360	inside	1142	replay	859	theme	757	melody	722	singing	678	glue	630	everyday	609	singin	605	ipod	389	repeat	232	elevator	221	loop	189	repeating	168	tune	156	randomly	128	lyrics	123
862	english	6429	history	4198	ap	3713	spanish	3551	schedule	3145	classes	2876	honors	2818	algebra	2583	science	2180	lunch	2000	biology	1783	math	1694	chemistry	1612	ii	1462	semester	1461	geometry	1420	art	1294	physics	1115	french	1093	lit	1004
865	truth	24461	lies	13791	lie	12633	telling	3193	told	2953	lying	1704	honest	1195	hurts	1020	matters	999	compared	876	tells	827	lied	813	hide	726	liar	724	tiny	639	honesty	628	secrets	376	hidden	343	liars	282	believes	273
864	ice	7460	skating	6204	skate	2878	figure	1968	roller	726	age	554	hockey	418	fishing	316	thin	312	sledding	231	wheels	157	olympics	150	slipped	144	arena	141	deck	109	attempting	108	derby	99	outdoor	88	boarding	84	snowboarding	81
867	surprise	11167	nice	6390	visit	4424	suprise	1916	pleasant	1616	unexpected	823	surprises	646	surprised	630	visits	447	showed	342	surprising	329	element	289	visited	281	planned	277	flowers	261	imagine	215	shock	169	expecting	151	suprised	144	prefer	98
866	anime	6632	manga	2556	bleach	2005	episode	1381	series	1237	japanese	968	episodes	776	chapter	586	characters	569	ep	553	character	495	convention	423	ending	411	japan	302	nerd	222	latest	214	comic	212	tokyo	181	8d	177	ftw	174
883	white	21883	snow	2399	stuff	1200	betty	1108	plain	1002	trash	989	dreaming	908	castle	787	horse	654	collar	518	flag	440	chicks	423	nerdy	396	jason	387	fluffy	339	elephant	337	joke	319	adding	313	phil	307	ryan	282
882	hide	12459	find	6999	yo	4883	seek	4397	run	3861	kids	2873	wife	1586	hiding	1198	husband	586	hid	526	gon	378	hidden	359	windows	322	tryin	292	rape	290	covers	271	built	261	escape	249	husbands	218	mask	200
881	finally	14564	yay	12526	home	9410	:	2120	weeks	1449	internet	749	yipee	250	yayyy	237	comming	113	>:d	105	:-p	51
880	break	18432	taking	8120	lunch	4103	record	3750	needed	2353	broke	1447	leg	1443	catch	1414	set	1051	bend	794	breaking	569	records	566	deserved	454	quick	408	studying	407	personal	367	straight	339	habit	220	managed	147	loose	141
887	tired	28579	soooo	3888	sooo	3676	sooooo	3224	sleep	2249	sore	2159	bed	1815	soooooo	1597	tire	1430	extremely	1395	freaking	673	yawn	526	soooooooo	502	nap	496	worn	491	sooooooo	484	grumpy	217	uber	177	sunburnt	169	incredibly	119
886	count	12535	square	4077	times	2962	pat	2737	circle	2096	blessings	1807	total	1633	counting	1454	sheep	1338	counted	1314	bringing	1178	counts	945	number	916	killed	879	root	605	ways	550	infinity	497	ten	413	thee	311	madison	256
885	today	13200	didn't	8025	earlier	4712	yesterday	4008	couldn't	1974	ended	1953	planned	1937	expected	1637	usual	1505	started	1454	decided	1243	wasn't	1216	turned	803	played	781	showed	655	luckily	517	worked	501	suppose	471	where's	417	originally	400
884	feelings	9006	emotions	5967	mixed	4803	feeling	3008	thoughts	2539	emotion	1488	express	1466	confused	1456	share	811	emotional	567	reality	533	losing	448	explain	439	hide	371	loneliness	366	mix	360	confusing	346	rejection	330	covers	320	unsure	225
889	put	8843	fridge	3438	microwave	2106	kitchen	1887	food	1643	freezer	1600	oven	1424	putting	1236	plastic	766	stove	708	bag	606	plates	519	table	470	counter	470	frozen	436	toaster	410	burnt	379	plate	377	mini	365	cook	365
888	books	12108	read	7453	book	6693	reading	6514	library	3076	sees	1966	bible	1833	open	1817	carry	1298	comic	1253	headache	1231	satan	1132	living	1064	defeated	906	takers	556	bought	554	amazon	547	re-post	527	section	508	shelf	414
775	sauce	4059	chicken	3431	salad	3030	cheese	2808	garlic	2515	dinner	2350	bread	2269	pasta	1935	tomato	1800	pepper	1744	fresh	1535	salt	1502	tomatoes	1354	rice	1323	onions	1211	soup	1172	onion	1048	yummy	999	peppers	964	mushrooms	957
774	half	31844	hour	14994	siblings	1550	stands	1111	sibling	1042	war	1006	smartest	867	spent	785	sisters	626	decent	601	brothers	556	naked	360	grip	309	heart's	287	dozen	263	tru	211	split	117	pint	54
777	iphone	8800	apple	4149	ipad	4017	app	3193	store	2932	ipod	2527	touch	1740	mac	1054	download	1005	android	972	update	802	blackberry	761	apps	596	laptop	523	itunes	483	downloaded	420	gb	411	pc	407	screen	396	updated	388
776	wit	11049	chillin	4961	havin	4172	fun	3962	hangin	3604	fam	2604	bestie	2104	nite	1616	blast	1417	tonite	1339	missin	1041	besties	856	playin	850	lovin	831	wif	740	gettin	600	jus	599	bro	582	watchin	541	chill	484
771	story	30223	toy	13040	TRUE	2078	short	1206	moral	1188	ending	1004	telling	661	toys	654	cried	560	sides	493	tangled	435	stories	419	tells	362	buzz	344	glory	282	based	265	bedtime	264	cinderella	218	touching	161	web	152
770	dude	15434	where's	3689	cool	2668	hey	2102	totally	1735	dudes	1671	wheres	1650	wtf	1447	random	1195	whoa	680	bro	460	woah	332	btw	316	legit	254	hella	241	friggin	217	lmfao	192	prison	180	waldo	176	badass	158
773	board	5409	frank	4699	joseph	2795	poster	1134	runner	839	anne	682	takers	554	destroy	469	planned	380	kite	327	warned	324	turner	247	diary	239	promotion	199	surf	194	discussion	182	boards	154	mario	153	campbell	148	protected	135
772	i'm	19302	guy	2232	proud	2058	bitch	1975	stand	1904	ahead	1663	cry	1643	fat	1579	drama	1563	fake	1490	slut	1341	wear	1284	makeup	1251	dressed	1209	queen	1156	label	1027	curves	887	trouble	825	mouthy	553	maker	446
779	love	39362	loving	1584	jared	1505	love's	925	haters	391	losers	163	enemies	149	secure	122	ing	113	supported	97	pimp	95	subway	89	commitment	87	saint	80	sinner	72	world's	70	protection	64	selection	49
778	body	22440	mind	10084	soul	7037	heart	3742	spirit	2726	parts	1403	aches	873	human	648	control	638	aching	532	temple	375	ease	359	weakness	325	healthy	266	speaks	236	heals	208	troubled	188	trapped	187	balance	163	toll	161
77	night	28913	bed	8805	nighty	2648	peeps	835	calling	555	ya'll	426	facebookers	383	bedtime	267	welp	130	allll	35
76	ca	3554	waht	1495	taht	1392
75	week	21650	busy	9807	weekend	7764	ahead	6686	hectic	1904	schedule	1763	rest	1670	forward	1269	exciting	755	stressful	446	prepare	408	preparing	378	planned	335	productive	293	whew	274	planning	265	week's	203	tiring	193	upcoming	175	loooong	170
74	motivation	4283	lack	3915	inspiration	3022	nerd	2261	inspired	1414	geek	1200	nerds	1058	motivated	875	complete	859	excuse	846	inspire	823	lacking	758	total	719	successful	587	knowledge	489	creativity	432	nerdy	346	imagination	318	difference	309	where's	307
73	metal	6644	music	5680	band	5543	rock	3862	bands	2402	heavy	1741	listening	1733	singer	1478	songs	1171	listen	1152	punk	1042	pop	917	hardcore	877	lead	822	jazz	731	blues	517	alternative	514	rap	489	folk	482	artists	451
72	min	12226	lol	5436	dang	1492	whats	1441	sm	395	havent	283	ther	266	gods	224	blew	212	offically	168	max	125	stephen	95	jeez	75	cal	74	hmmmmmm	72	toooo	66	somthing	50	esp	46
71	situation	5070	personal	3286	issues	3258	issue	2305	statement	1906	problem	1509	deal	1428	current	1428	concern	878	multiple	801	considered	777	previous	755	situations	717	problems	702	dealing	681	involved	510	avoid	463	general	456	manner	440	information	414
70	good	25141	day	15400	pretty	9919	feels	788	twas	179	hung	126	chilled	54
79	computer	9954	finally	9231	internet	8555	fixed	5330	working	4832	laptop	4106	yay	3921	works	1220	comp	1093	online	884	slow	706	computers	558	library	493	crashed	493	access	399	figured	340	technology	274	hooked	269	finaly	253	hooray	196
78	lo	5803	mc	3284	holly	3179	hammer	2228	deck	1181	buddy	779	halls	678	jolly	365	hitting	251	donald	121	speakers	93	smash	77	smashed	69	suite	62	judging	43
1043	sum	10637	jus	4692	ppl	4125	hav	3582	rite	1974	wit	1507	wen	1399	bak	1130	ther	1099	lik	1062	wat	1056	cum	1054	gud	1009	cuz	1001	nite	1000	tht	955	sumthin	792	wana	790	sumthing	746	shud	712
1042	alice	9969	wonderland	6531	lewis	1927	cooper	1655	tim	1573	winter	1562	cat	1126	mad	968	chains	593	beth	439	mini	254	adventures	196	rabbit	177	clark	114	soundtrack	114	narnia	111	walkin	87	depends	81	fork	61	appeared	33
1041	forget	24589	don't	14813	remember	8462	learned	817	remind	681	here's	596	maya	359	forgotten	230	view	226	involve	221	troubles	166	tend	162	nevermind	140	forgetting	140	beg	116	reminder	114	fee	106	forgets	81	responsibility	78	partying	63
1040	hehehe	1933	nyt	1349	hehe	1334	hahaha	1239	manila	1202	yah	1163	gud	1019	=	952	tnx	883	ol	775	guyz	726	sm	700	^_^	696	philippines	605	hehehehe	586	hahah	496	whew	464	hahahah	354	tym	337	bonding	270
1047	da	9327	wit	5130	bout	4168	jus	3647	ta	3362	dis	3051	sum	2836	nite	1837	sn	1682	lil	1590	ma	1445	goin	1181	gud	1167	dat	1030	wat	990	rite	965	fa	951	ima	917	cnt	814	dwn	763
1046	dirty	12004	whore	1964	bastard	1644	bastards	1266	dancing	1235	dirt	1136	filthy	1029	heads	687	cheap	654	nasty	644	talks	624	rotten	409	disgusting	382	mud	341	bitches	336	greedy	327	minded	254	slut	245	smelly	242	sexual	223
1045	miss	10411	dad	6298	man	4234	missing	2766	girl	2423	daddy	2077	forever	1462	boyfriend	1378	show	1265	husband	1051	princess	900	girl's	872	loving	736	dad's	730	misses	584	guy's	473	remain	455	queen	412	compare	404	worse	349
1044	support	7534	leave	4898	free	3555	show	3539	stand	3323	troops	3188	hour	3101	post	2413	excuses	1729	lets	1659	everyone's	1537	front	1324	everyones	933	country	664	bra	632	land	590	brave	584	colors	337	yr	291	countless	269
1049	favorite	14535	color	11753	age	5711	birthday	5244	full	4522	eye	4359	nickname	3197	middle	2932	bet	2776	answer	2636	questions	2358	hair	2331	bestfriend	2225	food	1897	colour	1818	fav	1613	favourite	1435	moms	1124	soda	939	do:	823
1048	time	14408	mine	6422	line	2674	fine	2522	didn't	1987	dear	1436	fucked	1120	fault	1056	anytime	795	spine	756	chills	478	spare	352	min	350	includes	302	continues	262	favor	253	sends	250	messed	234	rhyme	219	ck	189
1681	hard	5014	easy	3929	front	3110	deny	2367	ignore	2253	pray	1901	stay	1240	church	1172	christian	1055	jesus	1019	afraid	1017	lord	1003	father	973	laughed	934	celebrity	853	worship	840	re-post	776	swear	701	awake	691	infront	534
1680	line	23674	lines	4863	waiting	1845	standing	1576	straight	1556	finish	1408	fine	1319	front	1104	thin	1087	cut	989	cross	979	draw	959	pick	893	bottom	757	drawn	658	box	589	drop	553	cheesy	326	stood	304	crossed	287
1683	ahh	3931	ahhh	3160	ohh	2824	haha	2663	soo	2341	ohhh	1836	yess	1802	noo	1686	yesss	1617	nooo	1498	ahhhh	1250	hahah	1186	yessss	1131	noooo	1008	hahaha	976	mann	967	heck	696	ahhhhh	561	ohhhh	533	nooooo	498
1682	appointment	6636	doctors	5830	office	5673	dr	4629	doctor	3913	appt	3413	dentist	2888	doc	2442	doctor's	1956	apt	939	surgery	899	visit	817	clinic	792	shots	590	medical	399	patients	366	schedule	358	orders	328	vet	323	scheduled	290
1685	suffer	3420	unhappy	2942	enjoy	2395	minute	1652	mar	1289	avoid	1129	insanity	1071	arrived	994	loving	938	hasn't	933	choose	889	power	788	suffering	659	events	524	consequences	445	enjoys	418	avoiding	403	miserable	293	suffers	229	bcoz	74
1684	night	22404	late	12605	stayed	5552	staying	4228	bed	3122	till	2136	slept	1039	sleeping	695	midnight	545	stayin	206	sleepin	86	regretting	58	ihop	54	snacks	52
1687	damn	35973	hell	5119	smh	796	freakin	583	freaking	552	shame	479	sexy	456	pissed	419	dam	314	nerves	300	friggin	261	hella	252	argh	241	hott	223	where's	198	gawd	190	effin	165	busted	158	jeez	98	addictive	96
1686	writing	9018	write	6901	read	4367	story	4349	poetry	4003	poem	3908	wrote	3368	book	2919	reading	2774	stories	1832	poems	1805	written	1783	creative	1474	journal	1379	writer	1216	short	1197	notes	1184	poet	886	article	796	blog	782
1689	throat	15216	sore	13929	sick	4849	hurts	3581	fever	2279	headache	2056	nose	2022	body	1726	strep	1701	cough	902	coughing	841	swollen	761	killing	715	aches	638	flu	552	stuffy	523	chest	499	soar	475	ache	440	swallow	410
1688	woop	13612	xx	3306	woo	2622	xxx	1412	sophie	875	sat	690	xxxx	529	girlies	490	gunna	479	wooo	365	bk	363	uni	301	gd	293	london	279	sorted	233	woooo	218	tomorow	217	yey	206	xxxxx	179	cinema	167
1269	ups	8313	grown	4322	downs	3740	sit	1850	push	1816	full	1792	move	1576	hide	977	pull	712	folks	564	irritating	548	we've	515	posts	374	screw	369	hidden	353	learnt	130	pt	124	hook	119	realizing	105	fights	97
1268	terrible	10102	feel	5418	thing	5131	bad	4455	idea	3015	feels	2039	absolutely	726	attempt	450	awful	362	typical	259	sort	224	including	216	atleast	214	testing	180	passes	176	max	161	towel	138	chosen	113	records	101	engineering	81
669	sir	8409	ian	2696	mam	2182	excuse	2022	mr	1680	francis	940	alex	581	arthur	445	hahahaha	275	um	256	excellent	240	umm	193	richard	182	hahahah	170	hahahahah	161	courtesy	144	holla	121	bobby	119	gangster	111	jessie	105
668	steelers	7368	game	6860	jets	5663	packers	5239	win	4360	bears	3292	football	2324	fans	2294	team	2276	eagles	2262	won	2159	superbowl	2122	patriots	1727	beat	1705	fan	1265	nfl	1198	pittsburgh	1058	touchdown	985	colts	933	lions	923
667	share	9616	view	3933	received	3925	message	2038	mail	1870	media	1537	invite	1353	click	937	sharing	752	stream	552	apply	480	lonely	465	simply	404	joined	360	msg	358	private	319	shuffle	313	secrets	304	stories	251	feedback	231
1262	boyfriend	9235	girlfriend	7774	bf	5210	gf	4129	amazing	2486	guy	1718	boyfriends	752	jealous	682	girlfriends	649	bestfriend	647	lucky	576	sweetest	532	dumped	484	babe	454	relationship	442	dating	427	cheated	265	bff	242	bestest	201	material	191
665	hours	18568	minutes	11881	days	8353	counting	4310	till	4009	seconds	2886	left	2472	minus	1688	mins	1547	til	966	starts	663	ten	517	minute	446	countdown	388	untill	373	lasted	336	hrs	306	remaining	261	thirty	230	commence	128
664	called	10491	master	4550	greatest	1839	jesus	1766	history	1675	named	1571	lives	1565	degree	1385	won	1363	conquered	1351	army	1317	crime	1279	teacher	1262	buried	1213	committed	1199	kings	1002	battles	977	feared	924	military	837	medicines	617
1267	tuesday	14984	monday	13062	wednesday	9645	friday	7230	thursday	6693	week	6559	sunday	3007	saturday	2965	calendar	692	schedule	305	skip	223	ruby	189	wed	103	wednesdays	50	week's	45	pancake	45
1266	smoke	8295	weed	4245	thinks	2408	high	1997	drunk	1967	likes	1960	drink	1640	smoked	1550	blunt	1328	lying	1197	sex	1039	joint	932	smokin	851	smoking	820	roll	762	drugs	703	blow	650	skipped	642	pot	589	drank	488
1265	great	7117	usa	4526	evan	1387	sucky	1284	woohooo	169	vacuum	50
1264	fat	15704	big	10765	ass	2220	skinny	1983	kid	1044	ugly	988	fatty	560	thin	431	large	423	huge	417	bastard	353	amy	323	chicks	298	juicy	293	slim	257	belly	255	fixed	243	tall	241	lip	238	arse	221
1469	facebook	10847	chat	10487	online	8799	fb	5040	talk	2435	offline	2009	computer	1432	chatting	1307	msn	688	log	586	reply	469	ignoring	459	messing	411	checking	397	thingy	396	messages	354	showing	295	notifications	261	maintenance	239	distracting	237
1468	girl	2738	kill	2416	earl	2041	picked	2034	save	2024	driving	1945	car	1938	grey	1744	amber	1675	seconds	1103	license	1045	recent	959	plate	920	child	767	alert	704	ky	664	idiot	455	yrs	380	canada	378	noticed	363
1465	bored	21555	im	10480	txt	7782	text	4010	talk	2839	meh	1196	hmu	1185	bore	899	kinda	771	somethin	645	fone	639	soooo	596	entertain	571	plz	452	hm	371	sittin	278	somthing	224	cal	210	waitin	171	uber	169
1018	sa	18374	na	14036	ko	10706	ang	7430	ka	5417	pa	4178	nga	4164	mga	3980	ni	3118	lang	2610	kay	2466	ta	2385	akong	2149	wala	1961	lng	1893	mo	1892	ra	1891	ako	1875	naa	1797	mag	1783
1467	book	7958	turn	3576	page	3121	grab	2507	part	2246	rules	2041	sentence	1923	mention	1703	post	1482	closest	1428	national	1008	coloring	797	title	651	nearest	602	choose	437	chapter	360	instructions	329	coolest	285	turning	229	lines	227
1466	i'm	25299	thinking	9418	taking	2160	nope	2008	hoping	1325	kind	1316	sam	259	guessing	230	assuming	217	deals	197	unsure	178	geez	137	depends	133	nursing	127	booze	126	races	123	speaker	100	nan	93	congress	87	spree	59
1461	finished	17944	finally	15965	yay	3181	exams	2572	assignment	2483	homework	2417	essay	1831	uni	950	paper	810	phew	759	woohoo	728	whew	696	completed	662	assignments	591	relieved	436	relax	401	handed	382	project	301	spare	250	finaly	208
1460	fingers	20015	crossed	10376	cross	4155	keeping	2945	crossing	2339	interview	1511	hoping	1485	toes	1419	snap	729	hopes	477	finger	391	paths	340	keepin	291	pointing	258	applied	247	slip	185	bridge	154	numb	154	slipping	120	tips	102
1463	important	17758	life	10578	things	8171	thing	7087	realize	2011	what's	947	importance	648	matters	582	focus	501	knowing	393	honestly	300	succeed	253	priorities	241	forgetting	177	catching	174	guard	170	helps	161	counted	145	helmet	134	realizes	131
1019	word	20619	words	5601	meaning	3802	dictionary	2835	describe	2796	means	2625	definition	2017	urban	1424	phrase	1218	english	1190	sentence	1045	language	942	term	749	define	692	latin	557	spoken	506	defined	363	written	357	letters	351	longest	316
1317	person	37890	kind	1894	loves	1852	wrong	1663	realize	1408	special	1213	persons	709	cares	693	person's	550	average	549	normal	534	important	520	type	365	sees	362	believes	319	opinion	306	invented	291	specific	253	ignore	246	ugly	242
1316	blood	25708	TRUE	9376	gave	1552	pressure	1331	sweat	1273	season	1085	giving	856	donate	720	drawn	716	donated	577	covered	544	shed	467	low	435	sugar	381	vampire	327	donation	322	eric	306	tru	303	flow	301	episode	295
1315	ng	12249	ang	11426	ko	6015	sa	4336	sakit	3476	sarap	2204	ulo	2133	pa	1468	saya	1459	hirap	1374	naman	1273	grabe	1259	hay	1081	talaga	1049	mag	854	net	772	huhuhu	714	tlga	712	sobrang	640	mata	580
1314	hard	6562	laughed	6195	cried	5045	laughing	1701	told	1449	fell	1350	loved	1274	looked	1261	smiled	1016	watched	988	haven't	984	gave	970	died	868	loud	829	noticed	825	sat	699	literally	683	asked	658	bet	607	threw	582
1313	computer	11928	laptop	8327	mouse	5553	screen	3501	mickey	2360	keyboard	2095	fix	1147	fixed	1067	broke	999	pc	779	desktop	661	hp	645	typing	602	monitor	583	computers	577	crashed	433	fixing	418	staring	418	pad	416	desk	411
1312	game	18483	won	8922	team	6179	played	5539	soccer	3208	lost	3044	football	2646	win	2397	season	1872	games	1776	score	1760	boys	1722	scored	1660	basketball	1443	goal	1424	points	1377	proud	1161	beat	1035	winning	857	hockey	782
1311	snow	30250	weather	4602	inches	4017	winter	3706	storm	3520	snowing	1656	blizzard	1397	snowed	1310	supposed	1252	degrees	904	spring	867	ground	798	forecast	610	inch	571	freezing	530	suppose	481	heavy	388	expected	376	delightful	340	foot	336
1310	sun	29948	shine	6315	shining	5785	light	4163	moon	2765	bright	2429	shines	1877	stars	1468	rising	1263	sky	1113	sets	1056	brighter	959	clouds	923	birds	811	darkness	767	rise	740	rises	714	star	670	beauty	510	sparkle	475
1319	sing	22465	song	13187	singing	9212	songs	4558	hear	2579	sang	2438	voice	2201	listening	1251	karaoke	1212	tune	1123	melody	1117	sings	1094	loud	816	sung	667	choir	540	angels	535	forgotten	452	singin	414	chorus	381	key	371
1318	jimmy	6287	karma	3888	johns	918	carter	905	screw	811	buffet	613	eventually	370	entertaining	345	revenge	240	aka	201	bite	197	returned	169	cracks	145	dean	139	coach	134	central	132	johnson	131	drake	110	pat	105	fitting	52
1010	light	19952	dark	8078	lights	6173	candle	3102	bright	1766	turn	1737	candles	1613	darkness	1606	lit	1481	lamp	1398	bud	1358	glow	1293	shine	1290	switch	697	burning	687	spark	587	lighting	466	lite	382	shared	253	blinded	247
1011	farm	7857	farmville	6540	neighbors	3571	neighbor	2541	send	2055	town	1577	add	1029	harvest	983	cows	810	animals	790	gifts	652	chickens	629	cafe	565	neighbours	560	trees	435	feed	405	plant	396	horses	372	addicted	351	berry	345
319	moving	11139	stuff	7322	packing	7136	move	5727	house	4536	boxes	2848	moved	2666	place	2377	apartment	2376	unpacking	1476	cleaning	1368	furniture	1189	pack	901	storage	795	packed	669	helping	626	apt	516	movin	505	unit	474	settled	471
318	forgive	13475	forget	9642	remember	2664	laugh	2328	short	2204	regret	2073	forgiveness	1915	hurt	1890	quickly	1878	learn	1653	slowly	1018	enemies	961	kiss	896	mistakes	889	apologize	880	rules	762	forgiven	700	ignore	665	chances	646	forgiving	599
313	peter	7427	pan	2679	superman	2434	batman	934	griffin	887	clark	731	brian	512	susan	508	hears	481	kay	297	covers	231	lane	222	parker	196	andrew	194	powers	181	meg	180	hook	172	cape	156	returns	144	pete	126
312	kinda	23132	sad	3335	sorta	3173	sucks	3080	bummed	1355	feelin	1123	sucked	1043	lame	718	upset	695	depressing	648	pissed	636	tho	633	scary	615	disappointed	473	depressed	464	messed	287	liking	251	atleast	241	dunno	237	#N/A	231
311	close	25615	eyes	17420	things	4268	heart	3248	dream	2022	kiss	1351	cry	1171	everytime	960	greater	418	drift	373	imagine	262	pretend	234	temporary	197	burning	173	closing	164	fee	155	distant	147	believing	125	breathing	112	eternal	110
310	love	64125	affair	628
317	xd	69928	:\	183
316	james	13558	rick	3121	bond	2345	miami	1819	ross	1813	jessie	1400	wade	1184	lebron	1091	cameron	711	rolled	611	chris	457	giant	419	dean	417	heat	389	blunt	368	cleveland	335	csi	300	jesse	289	madison	232	peach	215
315	finally	7715	ahh	4963	ish	3784	starting	2900	hah	2609	omg	1913	ahhhh	690	workin	431	heck	404	friggin	401	fm	390	ahhhhhh	317	correction	249	dam	240	finaly	199	snowed	161	alll	143	tomorow	123	eff	47	sighs	32
314	bed	26867	tired	4532	ready	4221	sleep	3699	laying	3027	shower	2486	crawl	1749	goodnight	906	exhausted	765	bath	639	layin	623	outta	432	sleepy	407	cuddle	384	curl	380	heading	368	tanning	301	snuggle	280	comfy	274	pooped	200
1520	monday	24107	morning	5755	tuesday	4727	sunday	4257	weekend	3063	till	2565	til	1382	blues	1009	typical	419	mondays	192	postponed	152	dreading	137	yuck	130	survived	120	margarita	98	dread	30	suspended	30	arrival	21
443	matthew	4980	chase	3092	christopher	3020	gave	2681	dave	2401	jesse	2356	lindsay	2113	lives	2044	brandon	2003	news	1926	reed	1906	king	1878	stanley	1817	allen	1812	tate	1675	sheldon	1613	justin	1519	zachary	1490	brett	1480	lohan	1443
442	don't	14907	it's	11873	there's	4153	care	3401	that's	3255	kidding	1971	truth	1802	doesn't	1682	isn't	1577	emotion	1125	pain	1118	knowledge	713	month	548	blood	426	wondering	402	diabetes	343	involve	338	grateful	300	low	290	checks	283
441	inside	19042	deep	6331	feel	5885	heart	5197	pain	2466	hide	2083	eyes	1879	soul	1716	empty	1132	broken	826	pride	775	lies	737	trapped	634	skin	613	lie	584	dark	574	hiding	572	beneath	564	touch	545	hidden	534
440	wanted	20738	needed	7218	didn't	4637	decided	3283	i've	2489	told	1716	badly	1511	guess	1500	couldn't	1186	gave	921	asked	833	felt	672	ended	593	realized	489	looked	423	threw	388	desperately	358	wanting	310	specific	215	dreamed	125
420	start	12523	week	11076	monday	8444	job	4885	starting	4861	school	3844	excited	2763	starts	2188	tuesday	2089	training	1742	classes	1500	college	758	orientation	548	woohoo	412	january	351	thursday	308	internship	288	offically	58	placement	39	paperwork	31
447	bank	10044	money	6302	account	3968	loan	1795	card	1618	paid	1426	student	1417	check	1352	credit	1300	banks	1253	balance	1197	cash	1147	pay	1109	interest	909	checks	703	rob	639	checking	587	atm	557	accounts	530	fee	461
1330	chelsea	5204	liverpool	3589	arsenal	3342	united	2834	manchester	2182	league	2063	match	1215	champions	1150	glory	1105	fans	1062	goal	1013	goals	640	score	535	premier	511	scored	429	players	425	player	340	ac	338	title	331	points	310
445	relationship	7603	relationships	3659	person	2587	friendship	2303	trust	2138	respect	1250	important	1030	commitment	973	friendships	883	understanding	812	communication	797	differences	748	feelings	714	honesty	692	share	653	personal	624	bond	579	distance	563	compromise	519	successful	518
444	scream	8062	wanna	7705	shout	7456	hear	5432	loud	1719	run	1628	yell	1563	outs	1552	cry	1480	voice	660	throw	631	everytime	521	crowd	446	freak	391	twist	231	lungs	204	shouting	164	silent	152	gimme	141	noise	136
403	social	14576	network	5228	facebook	4067	studies	2243	networking	1585	security	1138	site	1054	media	846	anti	795	sites	726	worker	525	cartoon	420	skills	248	website	228	general	215	actual	213	scene	210	gathering	167	manage	157	experiment	157
1861	camp	19963	week	4919	boot	3800	summer	3698	band	1112	leaving	1038	church	916	training	835	cheer	777	youth	383	volleyball	289	staff	268	pumped	242	cam	182	leadership	168	retreat	147	girl's	126	cabin	123	scout	95	graders	75
1860	bored	56306	bore	2401	text	1826	entertain	1524	extremely	845	boredom	693	boring	651	entertainment	330	incredibly	303	entertained	281	sooooooo	137	insanely	130	hmu	113	yawn	96	stiff	62
1863	beer	23902	drinking	3274	cold	3255	drink	3014	pong	1810	beers	1624	ale	1575	root	1285	ginger	1218	drinkin	852	pint	779	pub	715	bottles	610	bbq	585	cans	536	fridge	494	bottle	484	drank	482	bud	411	float	322
1862	school	16258	tomorrow	14519	back	9588	work	5208	ready	5054	yay	1808	kiddos	150	yayyy	128
1865	nick	9620	hah	2052	ahhh	609	cave	446	jonas	339	jr	323	playlist	256	infinite	209	griffin	183	nicholas	173	kayla	167	aaron	144	parker	136	effing	117	drake	91	carter	83	uhh	58	wack	56
1864	stop	12645	laughing	11435	smiling	6373	crying	3909	hard	2222	couldn't	1321	laugh	1083	loud	1074	talking	861	couldnt	670	floor	598	burst	595	caught	595	rolling	525	laughin	486	cryin	338	cheeks	259	laughter	258	randomly	244	hurting	181
1867	freinds	1111	finaly	877	su	655	dam	516	beleive	491	nan	447	confused	350	woohooo	283	realy	268	quit	210	haircut	189	mal	154	neon	142	ss	130	han	98	coincidence	96	constant	84	comming	83	whining	75	hows	75
1866	speech	9836	class	3647	debate	2414	topic	1572	freedom	1556	presentation	1475	interesting	823	discussion	752	giving	672	prepared	521	speaking	421	prepare	412	debating	377	preparing	358	kings	283	oral	281	public	278	excellent	251	speaker	222	today's	219
1869	pm	30406	08:00:00 AM	5146	saturday	1679	sunday	1543	8p	1484	thursday	1420	wednesday	1223	tuesday	1133	starts	921	meeting	827	schedule	718	noon	387	est	376	eastern	245	reminder	178	august	177	january	153	ther	152	tune	147	ish	147
1868	sean	5197	max	4946	jay	1176	hanging	851	parker	798	acceptable	711	andrew	321	hangin	319	alex	319	pat	279	buddy	277	shawn	277	ryan	274	misses	259	tyler	256	ruby	216	katie	199	paige	197	austin	177	molly	158
964	son	17321	daughter	9607	father	5235	mother	3815	proud	2667	oldest	1989	dad	1735	youngest	1431	told	1315	husband	1259	child	1192	wife	1023	yr	872	daughters	622	born	598	daddy	555	grand	505	sons	480	momma	430	law	421
965	long	27036	time	22451	haven't	4709	ago	4196	felt	1834	havent	1371	started	569	lasting	165	should've	142	weren't	131	shoulda	72	ooh	61	saint	57	innocence	51	deliver	43	loooong	37	refused	18
966	day	22523	beautiful	14203	enjoy	3888	sunny	3720	enjoying	3631	weather	2897	gorgeous	2520	lovely	2342	beach	1467	sunshine	944	rainy	645	glorious	557	absolutely	452	spending	417	fabulous	246	paradise	210	stunning	137	enjoyin	129	windy	116	picnic	95
967	great	21838	day	21485	today	5853	start	4170	alas	23	woooooo	11
960	hole	9238	dig	4393	deep	3113	grave	2240	digging	2023	holes	1251	bury	1225	deeper	1208	dug	1110	crawl	1097	buried	862	dirt	753	shallow	692	rabbit	619	shovel	554	ground	436	ditch	310	underground	294	yard	289	fill	281
961	interesting	14998	today	8274	pretty	2629	wow	2265	found	2050	hmmm	1676	stuff	1251	hah	851	definately	735	exciting	704	hmmmm	495	apparently	391	entertaining	319	conversations	272	hmmmmm	261	hm	238	umm	195	horoscope	140	ummm	128	convo	109
962	day	32689	happy	14821	valentines	8101	valentine's	6383	valentine	4091	single	2354	singles	962	awareness	812	holiday	809	celebrate	633	flowers	604	feb	566	couples	441	lovers	359	romantic	348	february	317	chocolates	279	celebrating	253	sweetest	202	sweetheart	155
963	sucks	15474	suck	7042	balls	5567	big	3759	ass	2475	cock	2043	sucked	1506	dick	863	insomnia	707	donkey	595	sucking	488	blows	463	hairy	391	monkey	386	major	353	sux	319	penis	312	dicks	260	giant	230	grounded	179
968	cancer	5980	post	5154	died	4095	won't	3977	fighting	3674	kick	2815	wishes	2754	cool	2535	patient	2463	money	2398	honor	2369	ass	2264	bigger	1746	thousand	1641	date	1433	thinner	1396	dreams	1220	survive	572	butt	551	survived	534
969	thee	8235	thou	7241	thy	6362	art	4247	pin	3998	bb	2866	add	1073	blackberry	1009	lead	886	deliver	879	forgive	879	father	651	hath	622	flow	466	carry	425	river	381	amen	372	souls	322	command	312	tis	308
286	haha	5034	;d	4092	ahaha	3320	:d	3125	aha	2853	:	1996	lolz	1809	:p	1804	;	1547	lmao	1494	ahahaha	1253	hahaha	1027	hah	946	hahah	849	lmfao	805	funn	716	xp	642	;p	585	btw	478	ahh	477
1537	throw	11008	woah	3572	throwing	2908	air	2844	hands	2543	window	2003	rocks	1604	threw	1539	gon	1382	sayin	1020	towel	860	thrown	790	stones	749	celebrate	638	throws	581	temper	539	granted	515	diamond	512	collecting	403	dynamite	306
878	vote	16383	president	6619	obama	5634	election	3470	voting	2877	voted	2599	votes	1613	country	1499	political	1114	politics	1031	barack	950	government	809	congress	795	campaign	706	bush	705	america	701	vice	695	bill	650	poll	613	debate	585
1240	hoping	16684	here's	6152	praying	4743	wishing	4354	gimme	3339	heres	1121	works	618	wanting	602	miracle	511	hopin	436	stays	406	wondered	377	expecting	207	peaceful	172	smoothly	136	preparing	118	outcome	117	secretly	116	desert	116	tomorrow's	110
876	yea	26564	hell	8969	fuck	3318	sara	2900	ye	2614	hells	600	buddy	260	boi	137	umm	126	ummm	126	uhm	114	paramore	46	nay	45
877	dont	17629	care	12837	people	7325	deal	2549	real	2230	cares	1521	wont	1454	here's	1392	truth	1120	anymore	1054	moment	1050	honestly	846	beat	718	sooo	714	click	678	guarantee	523	heres	396	problem	395	cared	360	truely	316
874	facebook	5183	free	4944	start	3681	month	3306	pass	2047	turn	1720	official	1608	message	1513	sign	1448	blue	1229	services	1091	charging	1008	member	1000	wall	990	midnight	948	due	940	deleted	841	account	674	released	598	info	579
875	laughs	3116	smiles	2694	feels	2499	everytime	2291	she's	2105	thinks	2052	cries	1614	sighs	1060	talks	1046	giggles	1013	forgets	937	remembers	780	wonders	687	sings	531	crying	498	shits	492	screaming	338	dies	317	screams	293	jokes	284
872	black	30537	white	15189	yellow	4177	swan	3138	racist	1233	belt	1142	pitch	862	color	758	asian	618	pokemon	560	brown	474	grey	468	keys	451	dressed	396	gray	394	colored	345	sheep	289	racism	279	colors	270	shades	242
1243	problem	15907	problems	13176	solve	4376	solution	2812	solved	2156	suck	1833	pity	1061	complete	991	train	743	breaking	696	complaints	688	crashed	685	dr	608	mystery	444	avoid	438	life's	324	heck	319	issues	300	created	268	alcohol	263
870	goo	14505	pretty	3732	feels	2524	barbie	2361	doll	2310	ken	1900	dolls	1649	sounds	816	feelin	784	lifes	372	plastic	305	cells	257	gooo	91	brace	54
871	funny	13219	lol	9653	haha	9610	lmao	3109	funn	2600	hahaha	2084	omg	1655	sooo	1647	soo	1442	hilarious	1103	watchin	808	lmfao	765	hahah	754	hella	705	hah	682	jackass	422	laughing	381	hahahaha	370	tooo	344	laughin	195
597	love	17832	miss	14860	soo	3185	guys	2705	sooo	1977	soooo	1273	sooooo	1035	missing	1030	missed	576	soooooo	552	soooooooo	177	sooooooooo	140	youuu	34	privilege	12
1242	time	30024	bed	3990	usual	2760	sigh	1331	sleepy	1251	possibly	337	alas	79
9	cool	27817	pretty	9707	nice	3041	guy	1430	super	1373	hang	1259	chill	978	met	898	breeze	496	hung	414	bro	403	cooler	317	beans	288	it'd	233	coolest	232	peeps	209	talked	179	chilled	140	uber	138	refreshing	99
1533	yard	7481	grass	6167	lawn	5205	front	3617	side	2382	cut	2287	mow	1978	fence	1887	mowing	1712	leaves	1370	backyard	970	cutting	964	neighbors	877	garden	743	neighbor	565	trees	446	brings	439	milkshake	425	weeds	409	porch	345
1244	return	6246	tax	5348	owe	3346	taxes	3228	favor	2369	money	2286	returns	1089	pay	904	file	855	income	814	claim	785	paid	584	office	497	returned	463	sales	284	property	283	cost	237	government	229	bucks	197	debt	197
890	school	19554	starts	13031	tomorrow	7615	week	4627	summer	3988	monday	3286	weeks	1387	tuesday	967	wednesday	605	thursday	451	semester	367	tomorow	334	registration	273	kindergarten	203	yikes	140	orientation	119	aug	78	kiddos	66
891	:	5233	ugh	4188	bored	2089	#N/A	1860	sux	1833	=	1781	sooo	1759	atleast	1468	boring	1459	ughh	1247	soo	949	ughhh	793	didnt	751	tho	723	fml	699	soooo	617	grounded	560	grr	551	idk	497	isnt	396
892	lie	7361	steal	6611	cheat	3139	liar	2600	lying	2117	stole	1697	caught	1158	cheating	1136	stealing	975	thief	926	lied	923	cheated	702	stolen	436	devil	415	destroy	413	liars	411	someones	397	corner	356	depressed	283	crime	275
893	crazy	32827	driving	7853	nuts	4088	drive	2811	drives	1834	stir	893	drivin	505	phase	271	craziness	268	insane	235	range	225	nut	111	driven	101	craziest	67	shits	64	crazies	35
894	creepy	5722	guy	4070	kinda	3897	weird	3482	freak	1904	scary	1691	freaky	1565	creep	1531	random	1326	creeper	1296	dude	1294	stalker	1201	kind	1167	freaked	770	staring	657	o.o	539	weirdo	498	freaks	418	ou	411	stalking	398
895	dont	11895	youre	8441	ill	3831	theyre	2258	ive	2074	youve	1964	youll	1722	wont	1473	doesnt	1452	isnt	1124	id	673	arent	565	havent	450	wouldnt	368	itll	355	whos	244	everyones	239	heres	232	lifes	181	werent	166
896	hate	4238	lost	3620	moment	3032	long	2906	what's	2683	lot	2187	word	2155	care	1838	saved	1658	you've	1339	memorable	975	describe	823	meet	808	alot	800	date	778	whats	630	answers	441	8	31
897	yall	18135	bout	2066	cuz	1581	ill	1248	ima	1195	aint	1148	kno	1132	lmao	675	imma	646	haters	390	holla	368	smh	361	dang	324	folks	314	talkin	306	betta	271	ish	262	tryna	261	gon	245	sayin	243
898	mum	21894	dad	7193	mummy	1869	xx	1759	mums	1502	nan	791	xxx	695	cos	654	dads	643	loads	308	mu	277	whilst	273	realised	266	xxxx	260	dad's	245	thankyou	167	aunty	141	bits	139	wheres	128	xo	122
899	it's	19920	hard	15509	harder	6534	easy	4933	find	4344	easier	2252	happen	818	goodbye	453	painful	419	letting	364	survive	332	admit	331	blows	192	humor	114	compared	101	ridiculously	40
646	hope	29568	let's	4015	stays	3744	falls	3646	works	2509	doesn't	1775	enjoys	1254	hopes	1253	turns	823	snows	530	helps	502	leaves	453	smoothly	277	lasts	200	hopeless	176	cope	99	sleeps	91	eats	77	everythings	64
649	market	7172	stock	1877	farmers	1310	buy	1295	bought	1178	invest	1099	local	899	owned	818	sold	776	sell	736	street	561	produce	517	fresh	443	village	415	owns	382	boston	338	exchange	310	buying	297	goods	287	shops	264
1248	home	19099	finally	12827	glad	6311	whew	1965	relax	1390	exhausted	808	resting	694	relaxing	623	settled	564	exhausting	149	cleared	147	relaxin	136	settling	58
641	great	16028	good	9647	food	6706	friends	6377	company	5050	lots	2862	evening	2083	dinner	1821	enjoyed	1494	drinks	1482	wonderful	1332	laughs	999	excellent	794	conversation	733	wine	660	fabulous	596	bbq	592	fantastic	487	picnic	307	laughter	272
1964	google	12197	search	4999	type	2763	internet	1653	chrome	1613	translate	1230	lucky	1079	wave	816	click	638	typed	594	logo	540	images	521	web	519	yahoo	481	results	411	website	382	searching	382	image	379	link	352	site	348
422	starting	18822	feel	13443	finally	3938	bit	1507	piss	1284	freak	521	startin	501	nerves	452	annoy	391	normal	278	begining	105	irritated	99	school's	78	pattern	57	homesick	28	toll	19
1965	game	4973	duke	3236	butler	2536	beat	1905	basketball	1844	lets	1739	state	897	kentucky	768	wins	644	michigan	596	tournament	543	coach	497	kansas	474	uk	426	fans	380	championship	367	devils	354	arizona	300	heels	269	winning	262
1966	grand	7247	creek	2981	hike	1669	hiking	1630	park	1544	trail	1443	lake	1211	falls	1138	river	1053	total	631	valley	610	forest	574	headed	544	springs	501	cave	498	adventure	489	mountains	468	national	464	hills	446	oak	433
1788	song	23455	lyrics	5879	songs	3839	music	2793	wrote	2574	write	2534	listen	1708	sing	1616	writing	1455	favorite	1364	heard	1187	singing	1114	written	1033	artist	847	title	780	rap	690	melody	690	chorus	544	verse	536	listened	443
1789	train	14772	bus	4985	station	4192	ride	2006	trains	1926	metro	1538	london	1234	tracks	1065	stops	769	buses	688	track	656	subway	573	journey	571	wreck	556	travel	416	ticket	362	central	325	delayed	253	plane	250	nyc	240
768	dress	18486	prom	7965	shopping	4455	wedding	3053	dresses	2570	wear	2112	bought	1738	fancy	1651	shoes	1430	formal	1336	homecoming	1254	outfit	1060	rehearsal	726	clothes	691	dressed	632	picked	611	fitting	510	graduation	496	wearing	471	heels	441
1967	time	30108	spending	9292	quality	6319	spend	5616	family	4936	spent	1623	enjoying	1405	hubby	1304	enjoyed	1237	needed	1140	fam	740	bonding	561	priceless	205	kiddos	135	familia	65
265	jack	17034	johnson	3270	captain	2104	willy	1171	box	1147	frost	451	bottle	447	hill	328	sally	321	jim	304	cracker	301	coke	252	daniel	232	russell	177	tacos	149	hook	130	pill	110	titanic	107	wagon	100	pal	78
1780	xd	1081725	xa	372598
1612	fun	17211	today	11820	yesterday	3730	swimming	1497	tiring	1355	carnival	1091	shopping	982	exhausting	870	lots	847	soooo	687	picnic	409	hung	384	kiddos	256	filled	246	amazingly	215	surprisingly	206	disneyland	166	volunteering	82
1782	tired	19585	sleepy	5682	sleep	4295	sooo	3843	ugh	3221	soooo	3127	bed	2846	soo	2517	super	1618	nap	1498	hungry	989	cranky	959	soooooo	410	yawn	294	sooooooo	275	grumpy	200	effin	127	sooooooooooo	124	drained	91	sooooooooo	90
1783	butt	12473	kicking	3934	kicked	3882	hills	1819	kickin	1054	butts	718	lazy	684	worked	609	freezing	542	gym	538	bringing	489	literally	421	kicks	385	allergies	323	heck	302	gear	280	bust	276	dragging	271	booty	267	cheeks	248
1784	jam	5817	hint	4832	session	2987	pearl	2674	here's	1507	harbor	1420	heres	609	folks	579	packed	490	cheers	449	jammin	422	def	355	sessions	293	hurricane	292	jamming	253	recording	212	clue	186	gig	185	sarcasm	165	fyi	98
1785	shoot	11051	shot	10240	gun	2257	photo	1810	hit	1765	target	1742	kill	1285	shooting	1000	bow	990	arrow	865	aim	833	straight	626	shots	526	pool	434	range	410	bust	391	bullets	390	bb	314	guns	312	illegal	242
1786	michael	21879	jackson	13079	micheal	2488	mj	1920	rip	1586	died	1438	dead	1327	jordan	701	pop	572	tribute	483	thief	341	mike	324	alan	314	samuel	303	andrew	295	ed	290	lightning	271	moore	261	legend	249	billy	229
1613	wouldn't	12166	didn't	11432	wasn't	5136	weren't	2618	knew	2435	couldn't	2059	wanted	1720	i'd	1348	hadn't	786	met	745	happened	740	crushed	646	surprised	439	explain	394	shouldn't	394	would've	303	recognize	291	destroyed	269	bother	252	confusing	247
1962	damn	8581	finally	6920	caught	3359	sucks	1974	sooooo	1825	forgot	1393	bore	932	wi	932	apparently	495	thingy	478	literally	453	hahahaha	436	tooo	371	grrrr	348	atleast	240	tonite	190	dragged	142	ughhhh	95	nooo	69	brb	66
1963	class	34902	classes	4664	cancelled	3961	canceled	2396	math	2274	english	2023	teacher	1968	college	1511	homework	1441	professor	1436	boring	804	campus	755	semester	682	spanish	662	cancel	524	online	513	prof	445	skip	380	students	377	skipping	352
1078	lakers	9783	game	7072	celtics	5385	boston	4009	win	3054	kobe	2771	heat	2753	nba	2426	lebron	2149	miami	1908	fans	1539	beat	1479	bulls	1443	suns	1277	finals	1099	cleveland	947	championship	627	basketball	585	magic	561	series	542
1079	box	15815	chocolates	2463	shiny	1779	boxes	1536	forest	1251	names	367	empty	326	gum	309	cereal	288	opened	270	sharp	269	tissue	258	honesty	243	shaped	233	tool	193	dull	189	giant	182	colors	178	shoe	174	momma	166
1076	push	7303	pushing	2901	wrong	2122	pushed	1335	limits	1189	talked	1144	you'll	1100	limit	969	held	862	pull	856	button	812	turned	775	phones	769	buttons	577	shove	555	wicked	544	harder	524	press	487	angels	336	surprised	323
1077	eyes	24565	open	22439	close	3822	closed	3155	wide	2929	mind	2425	arms	2384	opened	1963	mouth	1293	blind	692	minded	692	shut	691	barely	605	ears	484	lies	420	closing	420	disguise	391	brings	343	sight	331	rolls	251
1074	thunder	10726	rain	9042	storm	7458	lightning	6398	hail	2768	storms	2514	lightening	1420	wind	1046	lighting	1023	struck	951	thunderstorm	925	raining	797	strike	781	clouds	708	thunderstorms	636	strikes	562	tropical	473	heavy	472	hurricane	399	winds	374
1075	it's	13569	end	5189	years	4338	lincoln	2499	folks	2453	abraham	2062	count	1235	destroyed	441	quotes	185	lawyer	140	retire	83	genuine	71	overwhelming	55	hustle	53
1072	stress	18797	free	3810	release	1646	tension	1589	stressed	1372	pressure	890	rid	860	relief	831	level	754	handle	654	relax	625	stressing	612	worries	591	drama	552	stressful	495	relieved	465	helps	441	confusion	436	anxiety	388	levels	375
1073	mo	2318	te	2209	ar	1440	ne	1374	ti	1192	au	939	pa	918	ou	780	ta	674	ki	599	li	562	se	490	le	479	pu	478	po	372	ban	370	ia	350	nga	242	tu	201	ke	196
1070	impossible	8464	popular	2726	opinion	1553	fact	1336	belief	1092	invisible	995	completely	635	difficult	621	remains	592	entitled	530	demand	480	attempt	477	easier	429	ignore	405	dare	388	simply	348	believes	325	tells	320	difference	312	unbelievable	306
1071	test	25249	passed	11634	pass	4365	driving	3497	tests	1681	taking	1609	pt	1596	permit	1425	math	1320	testing	1261	failed	1206	drug	1172	theory	1156	luck	1121	results	1050	placement	812	score	804	drivers	660	written	616	scores	615
1678	uh	12783	huh	7578	yeah	6727	uhh	1670	uhm	1395	um	1231	yea	1171	dunno	424	umm	399	nope	389	uhhh	376	duh	335	excuse	276	ohhh	257	yep	218	hu	163	how's	142	oops	129	yeahhh	126	nevermind	110
1679	kyle	6320	jones	5059	jeremy	3868	indiana	1944	robinson	581	mike	565	terry	479	misses	428	purse	246	mrs	235	chilling	177	diary	173	franklin	167	jordan	145	samantha	136	courtney	130	jennifer	128	lucas	124	ford	121	amazin	117
1674	blame	11984	fault	4331	wrong	3985	responsibility	1142	blaming	891	admit	849	neil	740	actions	739	responsible	693	shame	666	problems	624	smiles	619	apologize	613	apologies	487	excuse	427	excuses	363	consequences	287	hating	265	apology	216	complain	216
1675	today	18893	tomorrow	12020	yesterday	11345	hope	6830	live	2108	learn	1239	worried	930	hopes	369	promised	367	goodbye	290	technically	211	recover	191	tomorrows	145	troubles	116	dime	91	cherish	80	remains	65	waits	40	guaranteed	35
1676	mode	11313	chill	2512	beast	1520	brb	885	recovery	422	hahahah	382	pill	344	zombie	326	>.<	289	emo	282	panic	274	switch	227	review	217	btw	198	disturb	185	hardcore	178	entering	172	switching	170	t_t	168	muna	166
1677	mother	28142	nature	8377	father	2610	met	2436	fucker	1858	teresa	1024	fuckers	978	law	724	earth	598	grandmother	449	dearest	270	excellent	239	hamster	191	laws	161	existed	134	fart	131	warned	108	refuses	80	tease	79	bipolar	70
1670	hearts	7364	birth	3787	kingdom	2327	gave	2129	souls	1876	minds	1459	giving	1403	bodies	1189	certificate	972	control	968	beat	704	death	694	heads	394	remembered	308	gods	305	torn	304	worlds	278	connected	268	sets	267	practical	265
1671	today	14127	feeling	11335	bit	4721	gardens	1535	excitement	732	issues	589	emotions	531	sorts	460	usual	409	earlier	396	soundtrack	352	definately	270	bush	153	pouring	136	anticipation	95	overwhelmed	92	resting	53	bittersweet	44
1672	green	21442	bay	9033	yellow	2588	area	1237	packers	1186	grass	870	paradise	402	steelers	358	lime	341	bowling	327	pittsburgh	227	day's	223	pinch	222	seth	222	superbowl	218	dallas	198	zone	196	anne	174	gang	157	neon	138
1673	big	36161	deal	12076	brother	2892	huge	1177	ol	958	ego	568	hug	474	bigger	348	screen	289	pile	271	ole	264	butts	262	surprise	215	owe	158	heres	74	wheels	49	seal	36
1094	essay	16593	write	9363	writing	7611	paper	6179	english	5497	finished	3281	essays	3020	due	2848	page	2207	pages	2201	finish	1700	history	1482	written	1047	assignment	1020	wrote	1012	draft	903	papers	885	typing	828	paragraph	716	research	621
1095	jim	5321	duh	2475	maggie	694	fights	96	monsters	69	slim	68
1096	tie	4990	end	3776	loose	3527	hang	2783	tied	2329	attached	2023	dame	1917	rope	1366	strings	1357	ties	928	bow	896	ends	883	string	812	neck	667	shoes	592	shoe	554	choke	452	tight	386	trippin	323	wrapped	291
1097	gas	10118	car	9845	station	2580	drive	2570	tank	2267	ford	1613	cars	1571	buy	1358	driving	1274	miles	865	bought	751	drove	747	engine	720	prices	700	fuel	683	truck	654	dodge	627	gallon	610	pump	575	fill	500
678	mama	13426	baby	6888	momma	5058	papa	3925	daddy	2891	mia	886	babies	814	mommy	491	nana	357	daddy's	218	mamma	188	baby's	136	sissy	134	mam	120	johns	109	auntie	99	granny	82	baba	50
679	tyler	4953	steven	4199	aid	2788	financial	2118	seth	1673	stand	1626	kool	1387	roommate	894	gay	811	hung	770	shot	752	texas	627	office	444	jumped	443	freshman	408	bullying	378	bridge	348	rite	329	backyard	295	wright	96
1092	excited	19596	tomorrow	8273	tonight	5470	soooo	3808	sooo	3723	super	2646	yay	2100	sooooo	1557	uber	1534	ridiculously	283	excitement	270	soooooo	261	overly	230	flippin	212	satisfying	102	:o	66	workshop	62	grasp	61
1093	hmm	7344	hm	5520	hmmm	4448	hmmmm	2127	decide	1769	debating	1562	wondering	1534	wonders	1428	hmmmmm	1406	ideas	1152	idea	1149	contemplating	941	hmmmmmm	655	dilemma	638	idk	614	dunno	554	deciding	537	figure	527	thinkin	328	tonite	297
674	johnny	6537	cash	3707	depp	1507	jackass	433	register	286	flow	286	walker	261	cab	250	earl	190	becky	186	carter	159	chad	133	quest	120	definately	115	bff	109	cole	78
675	start	23981	time	10864	late	2520	guess	2293	ready	1781	working	1647	packing	1017	suppose	990	planning	959	saving	347	preparing	344	practicing	276	scratch	188	focusing	172	revolution	77	manage	75	tackle	55	professional	42	procrastinate	30	cracking	28
676	paper	9065	research	4036	finished	3965	final	3646	presentation	3528	project	3328	thesis	2492	finish	2275	assignment	2238	due	2060	finishing	2056	writing	1799	report	1273	draft	1217	proposal	1149	review	1117	essay	956	english	950	papers	937	touches	746
677	paper	30722	write	6823	research	5332	writing	5162	page	3439	due	2858	papers	2811	rock	2250	piece	1606	finish	1532	english	1458	finished	1402	pages	1038	scissors	979	term	926	sheet	719	beats	607	wrote	543	pg	514	throw	506
670	wat	24109	idk	5340	doin	1988	wats	1600	kno	1444	dunno	1435	happen	1149	ppl	1091	bout	1028	hmmm	779	happened	722	hmm	710	thinkin	632	shud	626	rite	541	hmmmm	502	confused	487	ima	482	wonderin	469	doesnt	437
671	hahaha	11404	hahahaha	6104	lol	4279	hahah	3315	funny	2727	hahahahaha	2596	hahahah	2309	hahahahah	1432	:p	1279	hahahahahaha	1117	=	904	funn	714	joke	633	hehehe	503	hahahahahahaha	465	lolz	462	kidding	192	hehehehe	187	hacked	175	ahhhh	149
672	i'm	32732	ready	11297	bound	1188	moon	680	clear	677	space	649	determined	596	heart's	483	june	480	ship	434	rocket	371	miles	271	joking	74	i'ma	66	eminem	49	steady	42	sincere	26
673	soul	11865	hey	4516	mate	3507	sister	2774	mister	1859	single	1493	sold	1442	move	1291	ain't	1009	devil	845	searching	796	fair	737	sell	717	mates	624	bodies	451	radio	436	lover	417	survivor	403	stereo	304	sista	287
645	monster	8045	monsters	2006	intended	1597	sarcasm	1148	pun	1129	beast	761	hunter	593	scary	533	flying	512	mash	427	created	386	giant	336	jam	290	begun	264	feast	264	spaghetti	242	backyard	239	ftw	215	trucks	195	massive	190
1418	wearing	6954	wear	5798	jacket	3889	shirt	3838	shorts	3261	black	2299	coat	2280	white	2231	leather	1777	pants	1755	socks	1740	dress	1716	shirts	1680	boots	1651	skirt	1397	sweater	1331	gloves	1291	jeans	1259	short	1191	pink	1174
1419	lol	7086	lo	5745	names	4029	wow	3949	ghetto	1370	peoples	1137	cool	1112	mention	978	btw	922	talking	904	apparently	814	forgot	806	diff	752	weird	697	thingy	570	heck	507	actual	499	retarded	422	ummm	374	mentioned	353
1410	wooo	7764	woooo	4815	wooooo	2716	whooo	2459	hooo	1567	woooooo	1416	booo	372	whoo	249	pumped	226	yessss	179	stoked	151	yesss	122	offically	103	finaly	99	gots	93	yaaay	83	gooo	50	exited	50
1411	smile	27328	face	19830	put	5159	smiling	2744	puts	1568	smiles	1153	reason	1118	grin	873	fake	592	huge	459	everyday	430	biggest	409	brings	383	wipe	373	frown	362	lips	325	everytime	311	brighten	292	tear	266	breaking	256
1412	men	29891	women	22573	woman	2224	women's	1202	ladies	999	young	946	grown	591	stare	455	international	444	mice	353	equal	352	rarely	349	attractive	257	male	251	female	245	men's	229	boyz	228	woman's	227	manly	202	prefer	176
1413	broken	23378	heart	12362	hearts	3363	fix	3251	hurt	1748	promises	1665	glass	1398	broke	1393	mend	1229	trust	1201	heal	925	hearted	877	mirror	754	relationships	746	shattered	744	pieces	706	putting	701	bones	538	breaks	534	cracks	511
1414	car	25280	insurance	3864	accident	3788	fixed	2265	broke	1710	fix	1574	company	1291	shop	1044	cost	794	auto	786	damage	781	wreck	767	repair	701	cars	596	saved	469	crash	463	vehicle	448	cheap	424	expensive	360	companies	347
1415	thinking	5678	aaron	3944	brett	3193	minnesota	1835	vikings	1824	randy	888	twins	728	retire	612	packers	553	rogers	470	mn	357	overrated	257	career	243	carter	230	coach	191	wisconsin	182	nfl	145	streak	111	roy	110	pat	108
1416	oil	7067	spill	2407	bp	2242	gulf	1393	gas	1186	strike	1118	sea	915	disaster	894	mexico	883	leak	569	died	567	olive	519	pineapple	455	spongebob	398	coast	339	drill	338	cap	325	explosion	296	virgin	277	rescue	268
1417	day	18144	today	11249	rough	5912	hoping	639	draft	449	smooth	307	possibly	258	whew	207	thankfully	198	spots	118	smoothly	60
1322	brother	23367	sister	15792	big	6801	older	2234	law	1730	younger	1636	cousin	906	mother	876	siblings	691	parents	656	twin	606	nephew	575	niece	467	sis	405	brother's	321	brothers	283	sister's	267	sibling	260	youngest	253	oldest	219
1323	jackie	3177	danny	3024	smith	2796	shannon	1626	chan	1621	tara	1570	hanging	919	ashley	611	chris	558	jade	400	nicole	370	heather	356	jordan	352	michelle	306	andrew	295	jen	291	corey	262	lisa	261	amanda	247	danielle	233
1320	er	5066	har	3958	til	3124	en	2504	med	2193	som	1270	der	1148	den	872	om	711	du	698	min	664	kan	627	vi	607	8d	587	meg	523	nu	493	bare	481	rt	269	han	264	tak	263
1321	shoes	14648	pair	5664	boots	3914	wear	3153	feet	2736	shoe	2647	bought	2475	heels	1950	socks	1911	size	1508	wearing	1468	buy	1467	pairs	1227	clothes	1206	fit	946	walking	727	dress	597	wore	559	brand	489	worn	415
1326	na	10863	sa	4551	muna	3407	bukas	2573	pa	2240	ako	2164	mode	1792	ulit	1441	hehe	1375	tulog	1261	lang	1258	lng	1235	nyt	1182	pasok	1151	walang	1097	log	988	mag	954	hehehe	893	po	892	review	820
1327	xa	39026	korean	116	8	30
1324	money	3951	support	3546	donate	3440	donations	2054	raise	1692	haiti	1668	charity	1622	fund	1462	donation	1288	cancer	1105	relief	1059	helping	934	benefit	931	donated	911	raised	840	foundation	768	local	755	event	723	appreciated	673	volunteers	616
1325	simple	14937	life	13413	things	10613	complicated	7159	plain	1926	easy	1382	complex	1195	difficult	1116	pleasures	662	confusing	637	simply	482	life's	434	easier	327	insist	269	pure	225	minded	192	rarely	172	joys	157	relationships	150	explanation	121
1328	journey	10631	end	2648	begins	2149	destination	1994	step	1946	begin	1171	arrive	1070	travel	1057	single	1012	totally	925	ride	863	miles	694	worn	654	safely	595	life's	553	adventure	542	thousand	518	possibly	517	sideways	505	arriving	486
1329	game	9667	playing	8993	play	7785	poker	4559	cards	3203	played	2441	beat	2091	bingo	1860	monopoly	1690	chess	1623	won	1476	score	1180	playin	877	games	872	uno	726	online	707	dealt	512	chips	462	board	452	skill	450
1531	dinner	6391	potatoes	5179	chicken	4833	beans	3470	steak	3207	pork	2987	potato	2612	mashed	2531	rice	2493	salad	2476	corn	2375	bbq	2253	baked	2251	fried	1973	cooking	1866	green	1637	cheese	1624	ribs	1621	grill	1465	yummy	1366
1524	people	18465	rude	3867	selfish	3003	stupid	2124	ignorant	1963	assholes	885	arrogant	820	they're	742	pathetic	708	racist	648	act	638	minded	629	jerks	523	idiots	515	immature	494	asshole	492	dealing	477	bunch	443	greedy	431	comments	402
1525	form	9429	shape	4472	torture	1854	sixth	819	rare	670	round	489	outta	397	return	390	bent	375	highest	366	realised	328	sort	327	pure	313	basically	308	ar	262	forms	257	folks	219	entertainment	197	communication	168	pleased	162
1526	life	16881	moments	11859	moment	8859	breath	3175	remember	2097	breaths	1276	measured	1138	number	1137	precious	1105	cherish	948	lived	604	remind	545	treasure	520	life's	512	priceless	405	happiest	353	touched	351	dull	328	memorable	271	blonde	260
1527	heroes	2229	remember	1965	that's	1771	hero	1596	gave	1300	sit	1226	sitting	1080	killed	996	iraq	947	empty	918	everyone's	917	laughing	756	chair	680	here's	633	afghanistan	576	smiling	543	serving	458	heres	450	fallen	447	respect	398
1252	paul	11731	sheep	2331	ron	2287	octopus	1550	gray	1318	jean	843	rip	753	wolves	722	les	589	wolf	515	sean	459	jesse	422	spain	318	mitchell	318	peter	288	lamb	257	clothing	240	grey	173	legend	166	german	163
1521	music	8986	sound	4571	headphones	2412	loud	2350	bass	2003	speakers	1691	studio	1630	hear	1574	drum	1493	volume	1233	recording	1123	blasting	1092	listening	1071	stereo	1035	sounds	987	beats	873	amp	788	drums	702	blast	659	ipod	488
1522	chicago	3829	headed	2730	heading	2074	trip	1354	tn	1235	tennessee	1162	leaving	1144	visit	999	ohio	831	orleans	775	town	723	downtown	676	bound	600	wisconsin	537	alabama	519	headin	467	indiana	464	michigan	434	cleveland	432	columbus	385
1523	rawr	5337	dinosaur	2382	steel	1902	means	1164	>:	715	pierce	554	field	338	grr	315	roar	259	grrr	229	reserve	214	raw	170	andy	147	exchange	135	thumbs	134	ghosts	92	eats	89	breeze	83	heroes	76	jeez	71
1528	wake	16829	morning	16204	sleep	7581	early	3674	woke	3632	feeling	3261	mornin	1499	sleeping	852	wakes	809	feelin	715	o'clock	436	waking	347	grab	276	bake	264	piss	241	glasses	209	noon	193	refreshed	193	coma	156	grumpy	130
1529	religion	6205	christian	3851	religious	2423	christians	1610	church	1279	catholic	816	bible	793	beliefs	740	faith	716	muslim	705	philosophy	609	jewish	605	muslims	580	politics	516	science	417	temple	413	gods	410	priest	337	worship	318	believes	309
1258	air	20092	fresh	5675	hot	2985	force	2014	conditioning	1840	balloon	1192	breath	809	coin	659	thin	559	smell	544	breathe	518	balloons	457	toss	443	floating	388	suddenly	365	crisp	356	ai	292	breathing	270	prince	161	mattress	148
1259	shitty	6339	pretty	2911	mood	1913	horrible	439	flags	338	piss	251	tops	196	crappy	173	clubs	154	racist	85
308	teachers	7021	school	5955	students	5412	teaching	2949	student	2792	kids	2720	teacher	2550	parents	1218	education	1062	classroom	995	teach	938	college	928	exchange	922	schools	855	honor	728	paid	696	order	664	ca	655	jobs	625	pink	588
309	longer	17778	stay	4536	minute	3396	bit	2614	seconds	1277	expected	1011	lasted	990	decided	904	lose	814	stayed	790	angry	685	shorter	520	weekends	421	upset	416	harder	399	teenager	332	lasts	319	allowed	278	eventually	229	usual	228
300	:	64563	smiles	141
301	i've	13974	years	8657	changed	6160	past	5239	haven't	3468	months	2421	we've	2041	times	2004	found	1815	you've	1745	realized	1536	hasn't	1505	met	1244	lived	1121	moved	1091	they've	801	grown	714	worked	703	knew	535	stopped	496
302	meeting	10052	conference	3468	staff	1619	student	1446	council	1371	meetings	1320	board	1289	attend	1227	group	1167	center	1135	members	1056	students	940	youth	917	leadership	909	convention	848	library	813	national	808	attending	798	international	776	seminar	712
303	things	17973	life	13270	realize	2936	matter	2429	granted	2357	perspective	1954	grateful	1828	enjoy	1730	kindness	1254	important	825	thankful	793	material	760	small	732	simple	648	puts	587	everyday	570	fyi	476	precious	441	reminded	406	struggling	361
304	lost	36392	game	2831	i've	2639	voice	1606	completely	911	pounds	644	wander	504	track	375	translation	361	gps	296	interest	237	wandering	231	wallet	209	paradise	200	tooth	193	gained	185	directions	171	cost	163	symbol	163	plot	138
305	march	8634	month	6055	june	5919	august	3817	st	3570	madness	2688	july	2648	coming	2365	end	2286	april	1670	starting	1026	february	885	beware	845	months	720	feb	709	hurry	607	september	563	january	359	method	303	mid	244
306	india	8327	match	4368	cricket	4345	team	4053	pakistan	2717	win	2086	indian	2055	cup	1632	won	1590	england	1277	pak	1189	australia	1071	runs	1020	indians	769	mumbai	715	victory	614	century	558	performance	503	wins	469	matches	418
307	rule	10655	rules	6388	world	5231	break	2450	follow	1180	exception	921	golden	790	fair	611	obey	582	allowed	487	apply	452	breaking	392	refer	347	anytime	289	tall	225	general	223	laws	223	life's	220	flooding	211	bend	205
473	wow	9573	wtf	6287	omg	5154	hah	2278	o_o	2164	realized	1473	hahah	1031	lame	751	ftw	695	hahahaha	604	freakin	543	fm	511	freaking	505	hahahahah	385	wierd	262	hahahah	243	umm	228	ridiculous	170	amazin	158	effin	142
1898	didnt	10878	wasnt	6294	wouldnt	4893	couldnt	2984	cuz	2372	told	2149	id	1682	isnt	1357	tho	1140	werent	982	doesnt	886	knew	752	alot	654	ive	637	shouldnt	622	suppose	362	fault	329	ment	298	messed	263	prob	259
1899	hates	21948	loves	11644	fact	2116	officially	1762	absolutely	1636	>:	641	waking	422	technology	314	weekends	166	goodbyes	164	hating	141	sundays	138	mornings	120	refuses	77	remembers	72	forgets	66	realizes	54	absolutly	48	colds	32
1894	weeks	23357	couple	9513	days	9080	months	4390	past	4200	left	3907	ago	2253	month	1853	haven't	903	pregnant	591	moving	568	hasn't	444	stressful	146	havnt	101	grounded	89	pregnancy	84	hasnt	51	bummer	48
1895	facebook	9371	post	7436	wall	6300	comments	5892	posts	4384	statuses	2941	comment	2879	posting	2674	read	2468	posted	2414	fb	2361	page	1309	likes	1130	write	1003	liking	979	notifications	975	peoples	946	delete	926	blog	899	people's	850
1896	work	11199	goodness	8032	makes	3311	play	2841	boy	1712	dull	1508	whew	425	bo	314	jack	240	geez	233	dreaming	227	ohhh	222	gangster	161	gangsta	96	rug	94	yippee	51	curves	45	brakes	33
1897	williams	4858	tiffany	1221	roy	996	robin	501	opera	448	paramore	394	operation	307	william	306	kat	264	tennessee	173	tip	139	lmfao	136	brandon	135	zach	135	eric	119	melissa	118	switched	103	evan	103	favorites	98	tru	90
1890	kind	17755	find	7516	funny	3992	sad	3925	hard	2260	kinda	1908	mad	932	strange	829	dying	757	dreams	659	sort	523	fourth	505	kinds	314	rare	256	ironic	233	circles	145	adventures	80	continues	66	refreshing	55	freely	46
1891	people	41877	lot	2734	aren't	1987	surrounded	1472	bunch	1248	wonders	1070	tend	886	realize	804	idiots	694	including	434	telling	362	involved	285	prefer	265	piss	253	kinds	246	generally	240	curious	225	personally	210	aware	180	advantage	171
1892	takes	9840	patience	7258	waiting	1915	lot	1873	virtue	1694	courage	1624	testing	1283	effort	1049	skill	889	killed	674	faith	521	requires	382	timing	377	sucked	348	curse	346	tested	278	patient	276	required	256	fate	249	thin	227
1893	cheese	14841	mac	5388	chips	3239	eating	3129	sandwich	2915	grilled	1971	dip	1734	ham	1270	ate	988	crackers	870	macaroni	813	sandwiches	802	salsa	738	potato	735	cream	691	soup	589	bag	565	mmm	555	tomato	509	tuna	496
959	dont	33417	worry	3641	whats	2358	coz	492	beleive	276	wan	274	atleast	247	grrr	230	arent	100	tooo	100	piss	97	hasnt	93	hows	79	ummmm	73	shouldnt	70	ment	60	suprised	57	friggin	55	shy	52	dumped	23
958	hate	7148	stupid	5883	-_-	4683	>.<	2155	gah	2101	ugh	2045	friggin	1941	effin	1537	sigh	1487	grr	1467	>:	1388	wtf	1219	annoying	1180	urgh	1146	dammit	891	sucks	845	-.-	730	annoyed	719	crap	713	fm	650
951	heart	19509	beat	15569	beats	4546	beating	4354	fast	1701	chest	1228	stops	1220	skip	989	faster	974	everytime	765	drum	757	heartbeat	732	hearts	722	touch	666	rhythm	598	bass	458	low	371	racing	340	pounding	311	skipped	293
950	question	18338	answer	18033	questions	13893	answers	7292	asked	4233	answered	2366	asks	1608	answering	1100	simple	760	quiz	675	correct	657	survey	453	response	449	riddle	410	today's	302	curious	269	askin	263	opinion	244	reply	220	correctly	218
953	made	39502	decision	2344	cry	2240	progress	811	realize	711	successfully	528	choice	496	mistakes	434	stronger	399	china	349	helped	304	barely	258	discovery	252	giggle	230	showed	209	brownies	207	brought	192	taught	163	realise	163	doubt	144
952	sweet	15975	dreams	12740	night	9550	sleep	5918	bed	4999	goodnight	3539	dream	2231	tight	1444	nite	1384	bite	1222	bugs	1043	pleasant	373	nightmares	254	goodnite	239	sweetest	227	nighty	206	bedtime	160	pillow	152	worries	137	peaceful	122
955	de	13160	je	9387	le	7939	la	7841	est	5568	les	5129	pas	5039	pour	4333	en	4064	ne	3375	vous	3085	des	2941	mon	2648	il	2581	ce	2577	du	2252	au	2123	tu	1930	moi	1785	si	1733
954	day	20806	great	19376	today	6503	hope	5873	celebrated	28
957	totally	20090	awesome	9030	worth	4754	rocked	1105	stoked	1090	freaking	709	owned	645	psyched	555	rocks	460	exhausted	450	bummed	374	epic	358	btw	334	pumped	302	freaked	257	sucked	255	awsome	227	wicked	219	rocking	196	unexpected	125
956	don	7794	ve	2955	ll	1296	quote	479	ca	324	haven	271	:\	220	quotes	182	cone	116	che	89	8d	79	whisper	58	writer	38	proverb	18
1263	wit	16697	da	10400	chillin	5483	bout	2885	chill	2848	fam	2694	goin	2265	lil	1439	jus	1358	bestie	1235	chillen	1204	crib	1148	ma	1108	homies	1107	nite	1054	sis	931	sum	921	boo	730	homie	702	bro	671
666	people	14693	care	3403	hear	2666	sick	2588	lets	1865	food	1427	bought	1365	heat	1283	worry	1262	children	1226	adopted	947	families	848	shelter	794	notice	782	showed	684	re-post	662	cure	650	weren't	578	invited	571	bother	549
1261	cats	8432	dogs	6900	meow	4355	cat	3527	kat	2178	kitty	1828	kit	1569	fed	970	raining	737	mix	421	promises	346	feed	309	kittens	294	mice	258	talks	249	curious	246	breaks	226	cries	186	von	183	laughs	182
1799	months	15318	years	10608	days	8865	ago	6588	couple	4460	weeks	3734	haven't	3100	past	2099	started	1755	havent	948	realized	578	eleven	245	twelve	239	dating	224	realised	203	hasnt	127	lasted	85
1798	world	5398	military	5230	takes	4708	minute	4578	missing	3433	family	3103	lives	2558	saving	2289	read	2271	member	2201	appreciation	1681	freedom	1610	safe	1331	members	1257	lifetime	947	caring	784	fallen	762	crush	697	hero	651	memories	640
719	hip	6686	hop	6342	rap	2574	eminem	1530	drake	1395	rapper	938	hooray	870	ft	807	beats	517	hurray	404	gangsta	397	album	380	jay	345	gangster	318	rhyme	308	rihanna	288	cent	282	dope	282	remix	272	listenin	270
718	shes	14707	girl	6677	baby	4829	she's	2131	sister	1929	cute	1067	alexis	1002	daughter	895	doesnt	606	she'll	507	girlfriend	372	chloe	239	niece	179	bff	163	kayla	158	adorable	145	hasnt	109	sleepin	94	shell	86	crawling	81
717	friend	10342	TRUE	9469	mess	4392	care	4175	broke	3812	doesn't	3548	past	3192	filled	3108	friendship	2081	question	2000	weigh	1745	speaking	1737	crazies	1578	months	1430	pick	1403	drive	1349	periods	1254	conversations	1254	re-post	1012	repost	867
663	tonight	21617	night	7730	fun	4830	dinner	3877	party	2665	drinks	2150	karaoke	2047	forward	1368	angela	1002	blast	432	b-day	269	pub	264	girlies	243	peeps	218	y'all	181	poker	162	casino	147	babes	138	hosting	113	bonfire	108
1791	hurt	21097	feelings	4936	ignore	2751	person	2398	hurting	1949	adore	1292	apologize	1167	locker	990	realize	824	they've	761	badly	650	ironic	537	meant	478	deeply	461	showing	439	disappointed	413	betrayed	369	offended	351	ways	330	closest	267
1790	i'll	31382	i'm	10251	fine	2375	guess	1696	there's	1535	call	1145	admit	1122	follow	1113	mine	856	dark	656	satisfied	622	decide	596	swear	500	soul	343	signs	303	alright	293	screw	250	ther	228	survive	173	you'd	140
713	god	56343	bless	15850	trust	1664	praise	1054	america	701	serve	502	glory	442	worship	374	seek	307	painful	288	almighty	231	believes	160	spiritual	150	inspiration	111	kindly	107	philippines	88
712	early	20085	bed	10013	morning	9776	tomorrow	7814	work	5127	bright	2053	wake	1447	heading	1123	bedtime	827	release	633	rise	632	awake	551	goodnight	449	earl	437	healthy	296	morn	152	wayy	110	rested	70	ridiculously	38
1795	opportunities	2124	possibilities	2017	opportunity	1781	endless	1747	;	1647	ability	1111	challenge	991	potential	983	improve	980	create	918	explore	617	experience	614	discover	580	possibility	557	talents	531	advantage	518	situation	491	infinite	484	unique	470	simply	469
1794	good	17569	sounds	16049	pretty	2713	plan	2567	nice	2186	hmmm	1311	hmm	1277	nap	759	yep	454	hmmmm	401	pla	361	promising	266	familiar	229	yup	206	sounding	158	ridiculously	102	delightful	92	nicer	73
661	wild	14481	buffalo	3940	wings	2934	free	1918	butterfly	1722	run	1719	oscar	1494	wing	1411	beast	824	wet	689	chase	636	horses	490	wound	440	imagination	300	runnin	219	ar	196	appears	165	crowd	159	cent	149	adventures	138
716	camera	9831	pictures	5947	photo	2237	photos	2097	digital	2090	taking	1948	photography	1894	picture	1824	shoot	1638	video	1402	pics	1344	film	1177	cameras	1049	photographer	933	professional	698	developed	449	studio	403	mm	392	shots	391	capture	383
660	watchin	10292	chillin	6270	sittin	5795	waitin	3937	relaxin	1657	eatin	1600	wit	1386	tv	1346	drinkin	1246	playin	1202	layin	1081	doin	1037	jus	976	listenin	968	havin	908	nothin	872	movies	785	wishin	720	thinkin	716	makin	595
1069	im	22831	dont	10236	bc	6851	ppl	1663	isnt	1396	didnt	1116	doesnt	973	havent	806	shouldnt	705	confused	666	arent	552	mess	490	wouldnt	374	atleast	334	sayin	292	untill	272	tryin	243	confuse	232	truely	205	ment	71
1068	i'm	44585	glad	9515	guessing	781	hoping	600
1061	weekend	15669	ready	7397	week	7029	friday	5965	tgif	4776	hurry	3414	glad	2011	enjoy	1272	relax	793	goodness	394	stressful	257	longest	183	yippee	120	payday	94	exhausting	81	dragging	54
1060	spain	7179	germany	6221	england	5192	brazil	3975	argentina	3305	usa	2735	goal	2622	win	2346	match	2274	portugal	1776	ghana	1601	netherlands	1381	holland	1210	score	1056	mexico	923	italy	845	korea	793	france	702	german	650	dutch	625
1063	night	17662	amazing	13799	awesome	10677	pretty	2342	epic	1718	wow	1209	fantastic	1069	gig	779	incredible	577	ended	380	fireworks	355	twas	322	brilliant	281	spectacular	258	wicked	230	amazingly	211	fricken	200	highlight	179	included	144	awesomely	113
1062	matt	11444	kim	5257	olivia	1914	smith	617	mat	519	moore	378	il	302	matthew	274	parker	173	ann	136	jen	112	erica	109	jared	97	ash	88	wilde	86	christine	80	muse	76	andrea	54	kudos	31
1065	xa	124366
1064	week	25781	work	6823	days	6735	rest	6316	vacation	3855	working	1351	relaxation	632	starting	631	needed	509	begins	502	longest	437	survived	332	rough	325	recover	216	week's	195	shifts	189	exhausting	184	meetings	118	thankfully	76	visits	56
1067	car	9849	driving	7404	road	7269	drive	5532	traffic	3706	hit	3222	side	2400	highway	1915	lane	1836	accident	1648	drove	1616	front	1598	cars	1590	wheel	1477	driver	1416	drivers	1221	middle	1075	truck	993	mph	955	street	799
1066	alive	17328	survive	3915	live	2896	moment	1925	dead	1457	die	1366	longer	740	keeping	625	buried	417	prize	345	sexiest	327	survived	303	disappear	297	humans	273	bleed	247	happiest	228	stayin	224	eaten	202	kicking	185	replaced	175
1669	i'm	17908	worried	6724	slightly	2945	bit	2448	concerned	1685	starting	1636	wells	1606	kinda	1488	scared	1205	upset	1124	annoyed	967	paranoid	831	disappointed	405	embarrassed	307	terrified	289	obsessed	255	anxious	249	tommy	227	unsure	188	relieved	183
1668	<3	5935	brandon	3540	zach	2666	amazing	2504	jr	1053	robert	1039	boyfriend	588	heather	374	katie	230	mummy	128	zachary	102	innocent	101	deeper	81	scrubs	49	'	39	hahahahahahaha	30	soooooooooo	30
1667	song	27792	theme	4300	favorite	4155	listening	2994	singing	2401	heard	2281	songs	2165	reminds	2068	listen	1897	fav	1542	tune	1325	sing	1136	favourite	1029	radio	987	sings	668	fave	596	played	567	listened	551	sang	489	plays	477
1666	saturday	13541	weekend	11784	sunday	11034	friday	9903	monday	2347	party	1955	excited	1868	forward	1595	thursday	1254	coming	1192	busy	1050	plans	953	sat	581	evening	570	planned	464	afternoon	437	weekends	367	bbq	215	possibly	207	flags	86
1665	de	4913	mi	4432	con	4354	la	4188	en	2991	el	1938	casa	1717	tengo	1035	pa	809	quiero	801	es	767	mucho	695	esta	654	familia	652	muy	618	estoy	611	una	598	bueno	456	ir	433	spanish	380
1664	pi	2299	chi	2121	alpha	1919	chapter	1312	beta	1149	delta	968	sisters	795	mu	772	congrats	727	brothers	676	ladies	571	rush	460	meeting	404	tau	326	campus	295	greek	289	congratulations	284	formal	253	shout	238	ata	189
1663	lmao	5929	omg	3251	lmfao	3205	funny	3186	hahaha	2790	rofl	2247	hahahaha	2007	hilarious	2006	hahahah	1039	hahahahaha	980	funniest	816	hahah	621	hahahahahaha	614	hahahahah	567	laughing	554	dude	504	convo	314	hahahahahahaha	307	omfg	283	priceless	280
1662	girls	9157	boys	3619	you're	3494	sweet	3424	girl	3179	hear	2951	throw	2827	opinion	2538	fire	2411	left	2147	blood	2055	ride	1848	ice	1817	tough	1711	york	1674	princess	1656	hook	1638	drink	1300	heat	1147	alabama	1006
1661	live	21959	love	15961	life	11256	laugh	3936	learn	2776	breathe	1589	simply	1069	motto	584	deeply	512	continue	323	regret	267	kindly	247	intention	146	edge	141	fully	107	fullest	98	freely	75	loudly	57	unconditionally	31
1660	bit	30930	lil	7470	tiny	2180	tad	1838	alittle	1430	feelin	1206	chilly	512	tipsy	454	wee	441	nervous	412	crush	396	ina	321	earlier	284	disappointed	240	admit	228	liking	163	freaked	137	hungover	133	slight	90	harsh	85
1087	choose	17291	choice	7671	chose	2792	choices	2346	path	1542	pick	1410	decide	1325	choosing	1065	career	954	wisely	859	options	839	multiple	811	chosen	692	option	621	consequences	418	carefully	377	decision	357	answers	225	circle	217	ignore	216
1086	vacation	12253	days	6581	summer	2469	mini	2377	cruise	1667	weeks	1588	beach	1422	needed	1260	planning	1205	enjoying	1168	officially	1044	florida	1018	starts	1004	trip	889	woohoo	540	miami	379	mexico	360	hawaii	346	booked	282	disney	215
1085	tonight	9458	homecoming	7015	fun	5257	parade	4189	dance	3539	excited	2568	pumped	436	bonfire	415	float	294	tonite	287	carnival	282	downtown	196	court	193	deck	191	festivities	98	rained	60	cheering	51
1084	massage	6732	therapy	5604	spa	2679	physical	2662	retail	1540	pedicure	1345	body	1333	facial	1005	needed	917	session	734	foot	650	relaxing	529	haircut	448	appointment	385	salon	349	nails	325	tissue	318	professional	315	relaxed	310	relaxation	249
1083	don	22616	ll	14727	ve	6984	won	1899	haven	712	worry	530
1082	gun	8044	guns	3062	shot	2403	shoot	2345	shooting	1868	range	1841	barrel	1172	loaded	1154	shotgun	923	cracker	881	bullets	745	bb	681	weapon	552	fired	492	machine	484	target	448	automatic	437	rounds	435	weapons	412	knife	279
1081	chuck	10289	norris	4737	jay	4597	wood	3998	cheese	926	coco	523	bass	281	jokes	280	invented	213	chop	212	chin	208	destroyed	174	hiding	153	jeff	137	larry	137	beard	135	split	123	decides	108	knocking	106	element	106
1080	machine	10965	washing	2520	rage	2149	sewing	1972	machines	1819	atm	1158	thread	572	needle	566	invented	483	invent	479	pin	230	pattern	219	answering	161	inevitable	147	needles	147	hooked	139	fog	137	cycle	112	gentle	87	device	84
599	beautiful	22882	love	11875	girl	1987	wonderful	1849	loving	1832	daughter	1412	girlfriend	1106	woman	1088	sweet	1004	perfect	816	amazingly	784	inside	517	talented	391	angel	281	wife	280	struggle	202	concern	163	loss	159	persons	149	absolutly	143
598	times	9407	million	8735	thousand	8145	ten	4113	hundred	3766	miles	3756	years	3280	reasons	2906	ways	1274	thousands	1184	hundreds	946	suns	692	billion	633	dollars	488	bugs	378	millions	319	hugs	304	fifty	280	lit	251	written	248
1089	man	31555	woman	19978	women	1695	men	1324	successful	1160	wise	633	wife	495	tells	346	treat	343	deserves	318	impress	223	independent	203	pregnant	196	woman's	195	naked	195	forest	147	satisfy	146	loses	144	protect	139	treats	136
1088	fast	17110	growing	7800	grow	2257	approaching	1145	months	1071	furious	982	babies	625	quickly	583	grown	426	pains	270	older	268	tokyo	266	drift	238	grew	213	weekends	177	amazed	170	kindergarten	161	wayy	158	tooo	148	crawling	139
714	hold	11802	heart	8030	son	6912	week	6425	lifetime	5448	daughter	5210	hand	5203	sons	5066	copy	3756	beautiful	3447	paste	3440	daughters	2222	wall	2052	worth	2045	describe	1941	living	1845	national	1225	son's	943	daughter's	854	handsome	496
1409	night	22343	fun	17867	tonight	5226	girls	4638	great	2723	party	1720	interesting	1095	eventful	363	girlies	251	crew	247	bonfire	195	sleepover	136	hella	110	karaoke	66	twas	55
1408	hope	2463	feeling	2006	wondering	1987	hmm	1578	possibly	1057	ahhh	1013	hates	950	fucked	651	fm	575	urgh	363	offically	330	stil	265	somthing	135	woohoo	96	ahhhhhhh	50	hahahahah	47	brb	43	unreal	19
1403	jersey	12873	shore	8651	fist	1820	pump	1633	episode	493	watchin	473	situation	393	ronnie	378	t-shirt	284	checked	255	cast	246	nj	205	reunion	203	mtv	181	champ	161	italian	150	watches	109	italy	107	finale	92	ron	87
1402	it's	15255	time	11994	kind	2944	putting	2398	guess	2299	shame	1910	won't	1214	ripped	736	vicious	464	bet	462	join	449	silent	412	sport	412	victims	349	sadly	326	it'll	177	attacked	141
1401	tape	5433	duct	1859	parents	958	sleeping	911	midnight	762	cinderella	734	lived	722	golden	680	duck	669	naked	600	silence	589	beauty	440	fix	440	behave	412	thief	384	silver	375	batman	334	lied	333	surprised	306	mix	295
1400	give	34969	giving	4931	advice	4154	gave	3498	chance	2571	gift	2534	hug	990	return	808	lent	758	props	548	permission	490	birth	437	shot	355	offer	339	receive	327	surrender	324	advise	304	exchange	278	ability	236	givin	233
1407	year	21787	senior	9079	freshman	3726	junior	3270	seniors	2299	college	2133	freshmen	1521	officially	1125	prom	661	orientation	536	highschool	478	skip	474	graduation	381	graduate	312	yearbook	283	citizen	265	hs	215	citizens	204	banquet	181	offically	168
1406	things	16256	change	14656	accept	5825	grant	4344	courage	2830	serenity	2549	difference	2512	wisdom	2496	strength	638	accepting	432	changing	315	responsibility	148	surrender	139	hopeless	126	reject	119	bodies	119	trusting	115	conditions	107	pretending	98	sets	90
1405	ready	27476	gettin	4829	leave	2705	start	1380	church	1226	set	483	pumped	377
1404	trust	21214	heart	4496	lord	2242	understanding	1823	ways	1704	lean	1587	straight	1068	acknowledge	979	trusted	939	proverbs	876	fear	789	direct	760	paths	712	rely	612	lead	595	trusting	565	guard	512	doubt	502	depend	490	betrayed	441
1546	good	25450	night	18372	morning	9173	surprisingly	367	hangover	155	facebookers	15
449	lo	8800	lol	4627	guess	2060	hmmm	1981	stat	1861	idk	1721	id	1422	err	1417	:-/	1394	trap	1193	date	1135	hmmmm	1124	sigh	946	prob	605	ummmm	466	geez	454	hmmmmm	449	ahh	354	temper	335	sheesh	334
448	ga	5700	di	5422	yg	5123	ada	5099	yang	4183	ini	2587	lagi	2585	mau	2569	apa	2076	sama	1894	ke	1753	saya	1591	dan	1542	aku	1515	nya	1407	tau	1260	hari	1209	dah	1015	anak	919	tp	828
1339	ur	11547	wen	7223	hav	5105	dat	4640	wat	4489	wud	2955	coz	2323	dis	2047	wid	1935	cud	1806	wil	1785	luv	1605	bcoz	1503	sum	1379	ppl	1316	lyk	1218	shud	1206	lyf	1132	tat	1073	gud	987
1338	i'll	27695	give	12040	guess	5973	i'd	1184	forever	1019	promise	938	you'll	660	touch	502	timing	391	gladly	307	closest	219	hint	175	eventually	128
1547	half	10734	week	9702	term	6702	long	4226	weeks	3625	mid	3222	left	2946	short	1808	terms	757	exams	690	prefer	503	halfway	460	quarter	408	realised	344	crisis	268	med	179	sem	91	technical	78
1335	library	7822	public	7487	general	1443	speaking	1315	private	936	planned	737	schools	648	campus	518	enemies	462	books	457	computers	449	teachers	434	employees	399	paid	364	closed	350	wisconsin	316	crashed	285	places	263	stock	257	main	248
1334	reach	8898	halo	6589	gods	1972	playing	1901	greek	1574	legendary	812	goddess	633	horns	452	midnight	394	beta	387	ancient	365	xbox	322	cod	320	playin	294	release	268	legends	244	ftw	221	owned	180	surrounded	172	highest	170
1337	hope	10735	tonight	9019	tomorrow	5651	lets	5108	aka	4255	ready	2991	hang	1611	ou	1463	bring	1114	hopes	774	ac	502	hangout	251	ther	148	sleeps	65	entrance	65	squad	28
1336	army	6590	navy	2865	marine	2164	guard	2124	base	1554	force	1363	air	1278	training	1173	military	1119	join	1001	pt	991	unit	982	drill	874	joining	740	marines	655	national	631	wives	566	security	535	basic	529	salvation	519
1331	plane	7342	jet	4685	flying	3806	leaving	2309	fly	2019	crash	1888	lag	1355	air	1218	pilot	1192	ride	1113	airplane	1020	flight	798	landing	712	planes	676	flew	599	land	566	ski	543	leavin	526	landed	515	crashed	484
690	love	25119	miss	5438	mwah	2302	lots	1617	xo	1559	hugs	1265	xoxo	1240	kisses	861	sweetheart	742	babes	604	babe	577	sweetie	471	hun	315	sending	300	darling	258	loads	209	thankyou	162	muah	157	alll	117	awww	117
1333	today	14381	day	12736	work	10154	literally	2725	nice	1832	exciting	1141	missed	961	busy	788	dressed	611	bummer	436	thomas	344	opportunity	243	capable	109	woohooo	27	accomplishment	25
1332	life	9534	full	4593	zone	3374	laughter	3225	comfort	3088	danger	1287	medicine	871	laughing	781	wasted	663	we've	635	matters	594	southern	440	thinkin	326	comfortable	306	laughin	242	reaching	213	entering	172	chief	162	involves	132	puts	111
691	computer	2655	error	2277	program	1865	photoshop	1477	server	1313	properly	1267	file	1141	website	1057	message	951	view	840	web	769	code	750	type	744	download	705	flash	653	install	639	software	621	microsoft	552	search	540	design	526
1542	wa	5458	ot	2471	bi	2064	successful	988	firm	867	wo	763	lay	639	thrown	531	foundation	503	bricks	254	ti	242	pt	203	fi	174	fa	173	era	145	ton	141	fo	134	ala	125	aa	121	ina	119
1631	friend	13849	friends	9619	list	6586	request	4121	facebook	3958	add	3415	accept	2631	delete	2309	requests	1967	fb	1618	deleted	1280	adds	1010	he'll	919	id	903	send	864	figure	816	message	798	added	672	christopher	633	adding	600
1543	god	22159	blessed	7244	blessings	5828	blessing	4824	lord	4697	thankful	4370	gift	3824	grateful	3811	god's	2248	wonderful	1832	giving	1699	thanking	1578	everyday	1435	bless	1088	gifts	852	praise	737	precious	737	receive	637	opportunity	632	share	610
39	dinner	9916	making	4374	beef	3634	cooking	3159	pot	3083	roast	2942	yummy	2932	spaghetti	2482	chili	2032	homemade	1194	stew	1156	lasagna	1117	cook	1116	chicken	1049	smells	997	yum	909	delicious	898	mmmm	805	supper	804	turkey	672
38	uni	6917	london	4405	offer	1760	university	1192	centre	966	manchester	725	sorted	627	offers	490	flat	441	fancy	433	uk	409	bloody	360	gig	326	brilliant	297	bk	260	liverpool	258	realised	246	fab	245	travelling	227	placement	226
1540	fire	27097	set	8470	alarm	2586	caught	1601	drill	1199	warm	1112	smoke	1029	burn	990	building	865	liar	853	setting	807	department	774	burning	650	works	624	bon	568	burned	445	pit	406	burnt	378	build	341	catching	299
33	angel	12695	devil	6346	angels	5735	heaven	3180	hell	2364	demons	1569	demon	1394	wings	1158	satan	845	sin	702	devils	651	fallen	587	shoulder	517	separate	413	convinced	396	depth	363	gods	358	disguise	358	powers	342	height	341
32	bunch	5179	ing	4142	jen	1939	lovely	1317	ot	504	screwed	488	row	433	suddenly	347	bs	340	standing	330	heck	278	changing	269	idiots	228	mu	223	generation	207	cast	176	ku	155	base	153	production	149	curse	144
31	block	10307	party	2198	writers	1352	blocks	563	blog	448	blocked	352	inspiration	211	cock	175	frustrating	170	blocking	164	halfway	123	grrrrr	105	writer	73	pointed	65	impress	64	switching	50	experiencing	47	fooled	23
30	pretty	28275	good	10534	darn	3306	liars	2443	damn	2196	intense	956	dang	676	stoked	604	decent	493	legit	329	yep	321	impressive	309	pumped	306	admit	269	bummed	268	witty	231	sounding	180	entertaining	124	pity	69	sucky	30
37	rock	21539	rocks	4855	hard	3045	socks	2078	climbing	1629	sock	1005	rockin	909	rocked	903	classic	746	star	609	kid	564	rocking	529	cafe	522	punk	496	roll	384	solid	374	style	320	boat	243	tube	240	stage	219
36	good	18608	day	12888	morning	10285	hope	8266	great	6611	begining	12	optimistic	10
35	job	22155	interview	19323	luck	5241	nervous	1441	interviews	1188	thursday	808	position	455	applied	357	hired	265	orientation	258	internship	247	offer	225	scheduled	213	manager	180	target	153	offered	138	promising	119	hire	113	mock	103	telephone	66
34	finds	3369	annoying	2168	extremely	2132	interesting	1917	thinks	1535	slightly	1453	amusing	1351	depressing	1220	incredibly	1169	entertaining	1087	odd	1028	confusing	956	kind	945	frustrating	820	fact	743	disappointing	741	disturbing	721	ridiculous	648	oddly	590	attractive	582
1241	end	33042	light	4198	tunnel	3067	beginning	2958	coming	2540	era	730	sight	689	train	638	semester	590	begining	326	wk	201	began	140	australia	138	rear	97	syndrome	89	comming	72	approaching	56	predict	55	maturity	33
1536	birthday	27756	happy	14893	wishes	13454	b-day	6823	celebrate	4855	celebrating	2639	birthdays	1328	present	1191	celebration	1073	cake	647	celebrated	573	mom's	489	belated	386	dad's	347	brother's	263	sister's	151	son's	97	baby's	84	festivities	48	daddy's	41
1535	work	12801	home	12342	back	11242	ready	3292	ash	1766	headed	1548	heading	1147	headin	1092	relaxin	157	returning	133	cloud	125
1534	stop	28720	can't	8567	thinking	6492	believing	2231	won't	2101	worrying	1649	dreaming	1435	caring	521	stressing	392	breathing	377	telling	360	lying	239	stare	228	staring	175	sharing	166	everybody's	56
1245	cookie	9431	fortune	5804	monster	1811	dough	1699	fame	1654	cookies	1415	bold	853	stole	710	jar	578	wheel	521	compete	306	exchange	295	raw	226	giant	219	claim	197	cost	188	it'd	186	reads	180	oreo	177	opened	168
1532	freak	4006	loves	3258	find	3244	crazy	3179	adult	2991	cares	2329	responsible	2244	worst	2236	drive	1931	understand	1873	nightmare	1856	lecture	1650	hunt	1511	front	1480	promise	1436	stalk	1300	worries	1114	children	949	flip	224	parent	174
1247	i'm	32434	gonna	20040	ain't	1147	crazy	800	he's	540	load	203	lead	115	cigarette	105	shotgun	92	shook	75	slapped	62	doll	54	that'll	25	girl's	21
1530	let's	25651	lets	3966	start	3320	toast	1345	alright	1186	riot	1139	c'mon	1016	assholes	465	gooo	363	steelers	353	celebrate	315	that'll	229	lakers	178	lasts	99	giants	98	pens	77	rangers	70	puttin	42	inviting	29
1249	married	7789	man	5342	marry	3850	wife	2700	single	2227	engaged	1993	dating	1801	woman	1607	men	1377	husband	1362	women	1211	marriage	1130	wives	915	happily	864	husbands	751	couples	729	relationship	586	divorce	547	pregnant	511	girlfriend	435
648	peace	11087	mind	6188	quiet	5754	peaceful	1863	calm	1596	silence	717	soul	698	ease	679	buddha	593	disturb	584	chaos	576	enjoying	574	achieved	566	understanding	507	midst	481	inspired	471	experience	453	clear	409	serenity	406	success	385
1539	luv	18941	ya	11823	yah	450	missin	392	thx	322	eva	268	alll	242	bestie	240	hun	229	ya'll	222	bff	209	xoxo	205	thnx	204	muah	200	tru	192	besties	167	babes	152	awww	150	ppls	133	lolz	129
1538	im	11842	tired	9446	soo	7415	sooo	7105	bored	6215	tire	2829	soooo	2289	freakin	2117	ugh	1041	ughh	1012	ughhh	724	stressed	442	sooooo	422	bore	395	effin	376	ughhhh	301	fricken	233	soooooooooo	157	uhhh	144	frickin	83
339	dying	8860	boredom	4351	die	3491	live	3224	inside	2731	gotta	1845	we're	1548	living	1305	turn	1154	crying	1145	chance	982	kills	859	save	738	dieing	708	throw	533	smiling	507	seconds	481	regretting	414	strikes	381	literally	353
338	yeah	8879	buddy	5757	ohh	4684	ohhh	3378	yea	2832	ohhhh	1695	yeahh	1546	yeahhh	1235	awww	843	cuddle	794	ohhhhh	602	awwww	494	aww	393	uhh	262	goodness	249	hahahah	232	snap	225	rollin	187	uhhh	165	boi	148
335	made	14851	mistake	9529	make	8282	big	4177	huge	2871	making	2496	mess	2023	biggest	1865	^_^	852	difference	441	decision	404	impact	390	muah	255	weakness	165	correct	128	correction	118	neat	87	:o	65	somebody's	64	illusion	63
334	turning	9544	there's	1278	turn	1235	calling	525	putting	464	destiny	305	leaf	221	wheels	219	doubt	205	jealousy	166	yucky	160	picks	159	dirt	140	cuts	90	greed	73	oddly	33
337	love	46702	gotta	10794	thunderstorms	38
336	>:	6017	stupid	5288	hate	4618	grrr	2753	pissed	2431	ugh	1999	freaking	1923	frustrated	1786	>:	1574	grrrr	1495	grr	1369	mad	1331	freakin	1081	annoyed	1055	frustrating	1039	annoying	1028	grrrrr	889	wont	756	irritated	587	grrrrrr	522
331	facebook	6281	settings	5375	privacy	4220	instant	3918	account	3463	websites	3313	setting	3091	automatically	2809	set	2691	called	2521	personalization	2285	data	2138	edit	2134	shares	1962	click	1917	sharing	1812	information	1702	btw	1696	applications	1547	screen	1493
330	kids	22898	parents	4860	kid	2723	babysitting	2152	babies	1254	babysit	1092	spoiled	1051	rotten	764	bunch	637	hubby	597	spoil	471	screaming	444	fed	370	cutest	332	adorable	240	dads	231	oldest	186	they'll	157	nephew	146	parent	134
333	year	42579	olds	2546	older	1361	age	1298	born	1095	dates	755	experience	721	figure	657	unusual	526	digits	498	equal	390	leap	353	gap	241	wiser	208	twelve	185	freaky	120	eleven	117	upcoming	84	sixteen	61	entering	55
332	should've	2983	thought	2951	didn't	2851	could've	2435	knew	2166	wasn't	2155	stayed	2056	would've	1958	shoulda	1955	told	1746	coulda	1535	wanted	1272	believed	1231	woulda	1024	couldn't	992	longer	987	earlier	886	happened	861	brought	764	showed	726
8	chocolate	18726	eating	2518	hot	2422	milk	2375	cheesecake	2241	covered	2207	factory	2108	strawberry	1652	icecream	1406	bar	1263	fudge	1243	dark	1158	cake	1112	yum	1051	strawberries	1015	yummy	931	mmmm	886	craving	871	pudding	834	mmm	797
1464	states	6147	united	5543	america	5429	flag	4872	nation	3654	let's	3384	justice	3345	stands	3333	pledge	3270	liberty	3153	republic	3080	longer	2742	offending	2513	americans	2512	allegiance	2411	fear	2092	grew	2007	indivisible	1772	country	1309	american	1246
1353	im	21012	bore	8391	bored	6696	soo	2636	sooo	2388	hella	1616	tire	1344	soooo	1284	soooooo	410	sooooooo	236	sooooooooo	167	atm	106	effin	85	uber	66	sooooooooooo	36	sooooooooooooooooooooooo	13
1636	games	22334	play	13150	video	9849	playing	9110	game	7332	played	2191	board	909	playin	869	hunger	649	wii	606	begin	501	plays	440	ps	367	addicted	270	addicting	236	gaming	196	violent	191	addictive	184	nerd	179	childish	125
1462	day	36327	quote	5669	hump	3403	highlight	1351	wednesday	767	boxing	530	longest	296	meaningful	223	judgement	162	halfway	110	arrives	94	brighten	72
1352	chicken	12522	fried	4321	nuggets	1254	pickles	1166	kfc	1162	ate	811	deep	800	bbq	768	pickle	755	wings	749	biscuits	710	rice	682	egg	630	proper	551	gravy	528	craving	521	tea	511	wing	420	biscuit	418	taste	397
1889	god	45914	bless	10289	pray	3453	blessed	2640	thanking	2133	praying	1918	dear	1802	lord	1522	blessing	1414	continue	1226	prayed	1051	prayers	754	letting	573	schools	487	blessings	448	allowing	447	allowed	444	praise	440	gods	388	devil	375
1888	boy	29761	baby	12645	big	4179	he's	2353	son	914	boys	844	rude	836	hes	610	bo	472	pajamas	259	tommy	186	lover	184	handsome	165	danny	157	he'll	144	cutest	137	swag	127	nephew	123	daddy's	114	crib	93
1887	beauty	14546	beast	5763	absolutely	3123	beautiful	2291	ridiculous	2007	woman	1787	average	1776	genius	1581	boring	1522	madness	1434	brains	873	charm	441	natural	360	nature	340	sees	334	perfection	298	sight	221	marilyn	206	absolute	201	appearance	194
1886	mom	22069	yrs	14273	wanna	9306	house	7165	years	5543	leave	3639	annoying	3298	lose	2956	mommy	2241	mom's	2214	post	2177	wall	1964
1885	put	20199	status	17741	wanted	8709	crush	8512	friend	7761	inbox	5500	comment	5344	poke	5334	brave	4678	message	4195	you've	3536	relationship	3370	post	3104	copy	2754	memories	2691	scared	2226	cute	2199	who's	1866	paste	1690	confess	1571
1884	fun	15986	today	13598	yesterday	7366	lot	6535	enjoyed	2293	blast	1449	flags	1273	lots	1107	hung	1075	hanging	822	beach	641	visited	240	ended	228	sunburnt	89	definately	76	sunburned	60
1883	awards	5298	award	4919	bet	3009	opera	2469	won	2410	phantom	1960	mtv	1042	academy	1015	soap	982	performance	957	choice	854	winning	846	congrats	688	congratulations	653	wins	646	deserved	639	ceremony	567	outstanding	452	winner	413	banquet	388
1882	snow	46553	snowing	1595	snowman	1196	sledding	1173	white	1074	melt	916	melting	864	ground	778	winter	605	falling	602	snowed	594	covered	521	inches	452	snows	441	shoveling	384	snowball	371	melted	361	cone	345	shovel	327	build	319
1881	i'm	30494	gonna	9865	jealous	2967	yeah	2725	sayin	1547	screw	197	insanely	164	complaining	56	dread	54	practically	32
1880	interested	6570	selling	5048	sell	3487	sale	3330	buy	3097	ebay	2453	buying	1639	price	1580	offer	1572	sold	1290	brand	1252	condition	1124	message	940	cheap	893	contact	779	bought	770	asap	740	item	725	deal	629	details	611
948	wait	26992	can't	24012	til	10648	friday	1961	saturday	1470	tuesday	765	wednesday	388	payday	59
949	race	12081	human	7135	racing	2235	races	1894	drag	1415	track	1360	horse	972	rat	812	cars	412	wins	384	beings	363	err	277	dale	236	kyle	219	driver	184	fastest	179	jr	172	motor	171	barrel	155	formula	152
946	boys	29793	girls	21421	teenage	847	they're	665	spice	496	colored	382	toys	285	cars	244	thier	99	girlfriends	90	girl's	88	boyz	83	theyre	81	bars	76	naughty	75	cracking	75	gals	74	dramatic	55	boyfriends	53	begging	51
947	asleep	21695	fell	14233	fall	7703	falling	6638	woke	3411	wake	1707	awake	1083	couch	1081	falls	1058	fallen	880	waking	543	fallin	538	dreaming	281	chair	259	wakes	238	lap	224	sofa	209	snoring	208	desk	195	woken	179
944	waiting	22370	sitting	10180	home	8638	awaiting	2043	wishing	1289	hubby	1000	arrival	932	results	614	hospital	608	hurry	472	chilling	290	arrive	195	patiently	193	awaits	107	bench	105	wishin	93	delivery	92	desperately	91	anxious	91	anticipation	74
945	years	19623	year	14343	eve	10190	year's	5923	resolution	4880	resolutions	1726	safe	848	decade	196	celebration	153	annual	147	tradition	137	hallows	136	previous	105	provided	94	encourage	75	gladly	64	promising	50	nicer	49
942	lol	7451	lmao	5771	smh	4924	sm	4407	swear	1155	dude	1066	wtf	904	dang	792	sn	731	wth	574	ish	522	dudes	445	realized	365	dressed	355	sayin	323	ummm	284	-_-	282	females	268	tryna	237	situations	216
943	joy	18022	bring	1791	filled	1743	full	1685	excitement	1387	pure	1327	enjoy	1041	happiness	954	brings	887	brought	879	laughter	762	experience	622	joys	610	share	606	source	586	pride	549	jo	541	joyful	457	pleasure	434	steal	410
940	killing	11317	killin	1088	starting	1006	feet	980	anticipation	561	literally	518	continuing	503	supposedly	481	falling	460	softly	449	heavy	444	warning	384	quarter	379	boredom	324	spree	308	field	280	spread	260	allergies	216	loneliness	203	fourth	183
941	house	10132	family	5365	mom	3506	cousins	2956	grandparents	2776	dinner	2389	cousin	2267	grandma	2177	parents	2163	dad	2047	aunts	1832	aunt	1820	visit	1675	uncles	1516	uncle	1306	visiting	1242	brother	1124	dads	1115	moms	1059	dad's	1019
133	tryin	2568	ain't	2186	lookin	2054	runnin	1761	rollin	1598	makin	1536	nothin	1524	gettin	1430	walkin	1408	feelin	1401	cuz	1354	somethin	1228	aint	1201	thinkin	1177	livin	1140	doin	1039	comin	1005	talkin	996	takin	986	sittin	976
132	it's	19217	shock	3724	fault	3390	that's	1958	electric	1768	turn	1189	shocked	658	problem	595	ridiculous	585	shocking	534	electricity	459	culture	396	shouldn't	392	awe	300	blows	255	fee	172	ooh	145	thrilled	83	sends	79	collar	44
131	time	19799	full	9223	part	5337	job	3529	working	1521	metal	1034	jacket	412	including	364	manage	260	average	239	smart	225	perform	222	trend	210	hospital	189	lover	179	latest	163	encourage	149	rome	130	property	122	local	120
130	future	20812	past	10853	holds	2311	present	1623	ahead	1508	bright	1178	predict	1053	brighter	518	lies	467	reference	450	create	444	distant	367	career	339	depends	326	planning	318	original	308	hurricane	298	replaced	257	promising	253	pas	249
137	roll	23249	rock	10765	tide	3440	dice	922	drum	628	rolling	564	rolled	422	heads	375	barrel	343	rolls	340	joint	311	alabama	294	drift	271	cinnamon	150	rollin	148	avenue	144	electric	126	twist	121	glitter	102	auburn	78
136	profile	16734	pic	14796	picture	11536	changed	3728	change	3577	pictures	2463	pics	2349	changing	1686	pokemon	1084	photo	1077	cartoon	789	display	729	pi	618	cartoons	509	upload	388	posted	316	updated	315	prof	299	background	265	characters	258
135	can't	35546	wait	22401	afford	1631	move	1549	belive	951	concentrate	399
134	hate	22002	hates	5907	passion	5203	fucking	2401	absolutely	1215	despise	1120	grrr	938	burning	910	pit	531	grr	461	mentioned	346	offically	326	grrrr	253	mondays	211	hating	178	secretly	159	buses	152	hated	146	pisses	132	>:	72
139	home	17082	work	13276	back	10994	finally	6360	hours	2715	headed	988	exhausted	331	chilling	298	hrs	151	stretch	66
138	learn	20853	learned	4466	learning	4308	lesson	3530	teach	3167	lessons	3139	experience	1679	grow	1496	order	1355	everyday	1094	mistakes	850	taught	715	life's	579	teaching	554	experiences	532	learnt	382	process	369	teaches	297	gain	290	properly	239
708	play	28813	game	11486	playing	4604	wanna	2423	basketball	1246	sims	1193	cod	1190	lets	1172	rules	1142	role	1080	played	848	games	722	playin	689	tennis	661	piano	529	pla	384	wii	338	pretending	136	uno	121	fame	49
709	opinion	1522	opinions	1400	logic	1176	based	1065	political	942	fact	876	moral	813	beliefs	696	philosophy	696	argument	688	logical	680	facts	616	society	611	simply	577	FALSE	552	values	547	statement	504	agree	496	ideas	476	behavior	469
704	concert	13584	choir	5893	band	3991	orchestra	2173	jazz	1766	rehearsal	1525	singing	1302	chorus	1269	performance	1209	solo	982	hall	825	symphony	792	perform	684	audition	545	concerts	529	performing	525	auditions	515	festival	440	singers	379	district	377
705	head	14973	wall	5306	hit	4529	clear	3846	brick	1978	bump	1327	banging	1104	thrown	885	hitting	847	throw	824	missed	759	threw	655	desk	650	recover	641	hits	570	smash	529	repeatedly	498	crystal	484	pillow	433	bangs	427
706	wow	12260	time	6926	damn	5471	fm	1735	ridiculous	606	impressed	424	gots	325	realised	311	hmmmmm	281	impressive	157	ridiculously	128	woah	111	actual	86	goddamn	84	sighs	84	>_<	66	enjoyable	31	babes	27	craziest	26	looong	12
707	hate	52433	fact	1009	guts	289	admit	281	liars	245	computers	219	equally	179	colds	163	goodbyes	159	absolutly	142	technology	113	lied	97	racist	87	mornings	80	forced	79	insomnia	66	obsession	63	hated	61	mentioned	44	despise	41
700	office	11066	desk	4318	hee	3766	working	2793	sitting	2640	tee	1824	raven	1716	writing	1149	space	403	chair	343	building	337	microsoft	284	eff	230	paperwork	200	reference	152	ribs	124	printer	90	aunts	87	classroom	80	meetings	79
701	ftw	1165	wanting	1049	fin	940	apparently	916	ahhhhhh	874	bring	779	enjoying	729	peeps	718	gots	586	dissapointed	309	sux	280	yikes	277	wierd	166	ohhh	117	yayy	100	flipping	93	rofl	73	soooooooo	52	messy	43	woohooo	31
702	lots	29522	fun	13904	stuff	2813	laughs	739	fu	278	user	256	gots	246	goodies	151	excitement	133	booze	64	compliments	38
703	waiting	36397	hurry	2346	patiently	2131	waitin	1599	arrive	1435	sitting	1236	happen	1127	impatient	407	waited	298	waits	223	vain	221	anticipation	193	desperately	124	cal	117
88	ready	21773	weekend	9768	start	7153	week	6041	packed	1097	begin	718	tackle	453	rested	162	refreshed	88
89	gonna	28463	im	12025	miss	2636	hang	2015	chill	1715	prolly	1497	tonite	1462	prob	668	tommorow	574	awhile	421	def	326	tmrw	239	tomarrow	171	tomorow	137	itll	92	babysit	69
82	lord	20063	psalm	4710	strength	1640	fear	1596	trust	1495	08:00:00 AM	1488	isaiah	1470	praise	1304	soul	1200	salvation	1156	bible	1099	spirit	1056	righteous	1002	mercy	962	afraid	874	proverbs	799	seek	795	shield	717	thy	640	delight	608
83	:	15678	:d	4111	haha	3863	:	1617	;	1421	hah	1203	hahah	614	ahh	489	hehe	475	ahhh	421	:	324	;d	268	aww	227	xp	206	yayy	168	gooood	118	;p	101	yayyy	92	wayy	82	cm	74
80	game	10078	basketball	6210	volleyball	6095	team	4914	play	4187	softball	3431	girls	2873	soccer	2582	playing	2296	tournament	2196	practice	1860	games	1619	won	1472	varsity	1329	boys	1318	played	1200	season	1017	tryouts	871	court	563	coach	504
81	rain	7160	waiting	4970	storm	4842	dance	4351	rains	3808	pass	3544	learning	3412	isn't	2351	pours	1367	storms	848	isnt	563	pour	408	survive	322	drag	276	rainbow	264	survived	187	snows	131	sunlight	117	umbrella	114	pouring	91
86	stop	9029	crying	6495	started	5434	screaming	3299	talking	2629	yelling	2284	running	1585	laughing	1149	telling	953	acting	861	throwing	848	singing	782	shouting	739	arguing	575	walking	556	starts	536	lying	535	fighting	513	jumping	508	kicking	492
87	studying	15607	anatomy	4046	exam	3962	finals	3776	test	3222	final	2499	exams	2029	study	1862	grey's	1395	midterms	1173	library	962	midterm	645	tests	602	medical	541	quiz	497	semester	421	psych	381	lab	371	bio	337	nursing	296
84	risk	6584	loved	5237	greatest	4223	return	3871	learn	1698	pain	1568	failure	1436	painful	994	you'll	981	courage	812	continue	770	pleasure	507	fatal	454	counts	444	success	392	spite	376	bud	339	remain	288	biscuit	285	involve	200
85	house	5815	apartment	4720	place	3794	rent	3777	move	2821	moving	1975	month	1692	bedroom	1461	lease	1403	signed	1210	interested	1198	area	1102	apt	1070	roommate	929	complex	885	contract	869	property	811	building	745	flat	654	asap	634
762	hill	10773	silent	3514	tree	2328	beth	1397	library	905	sledding	694	hills	461	moore	301	sang	295	ant	256	rolling	248	treatment	216	relate	185	forest	166	woods	158	carnival	155	cherry	148	plastic	145	lucas	143	pushed	120
1658	hear	8769	loud	8232	noise	3982	sound	3259	heard	2818	silence	2102	quiet	2026	screaming	1856	hearing	1790	voice	1735	sounds	1460	singing	1087	louder	1065	noises	1041	screams	998	neighbors	967	scream	862	annoying	859	crowd	807	yelling	754
1659	sick	10079	stomach	9996	feeling	6715	feel	6446	feels	2430	tummy	2039	bug	1951	butterflies	1731	ugh	1715	upset	1272	dizzy	1198	ache	959	headache	959	puke	773	horrible	710	flu	648	throwing	613	pains	531	virus	469	fever	435
1652	:	14027	:'	11912	miss	9065	sad	7310	missing	2141	crying	477	upset	437	'	367	aww	304	huhuhu	301	huhu	227	awww	215	noooooo	182	depressing	151	awwww	147	gutted	118	noo	109	;	98	noooo	88	nooo	86
1653	thin	5793	friend	5488	husband	5436	married	4734	thick	3550	proud	3490	date	3098	loves	3057	hard	2531	works	2240	worst	1848	paste	1124	wife	958	boyfriend	692	mate	416	anniversary	382	husbands	342	june	212	provide	194	includes	184
1650	surgery	10920	hospital	9028	pray	7596	prayers	5610	recovery	2653	dad	1779	praying	1420	update	1276	prayer	1133	removed	1067	thoughts	1061	doctors	867	recovering	671	grandma	637	admitted	582	kidney	581	liver	569	mom's	567	healing	564	continue	552
1651	time	13841	relax	11110	sit	4815	enjoy	4215	finally	3532	chill	3120	rest	1803	bit	1686	kick	820	awhile	292	relaxation	157	flag	121	planted	119	royal	116	reflect	111	housework	86	demand	84	booth	76	rebel	74	relaxed	62
1656	kid	25623	karate	3657	crisis	1470	fat	1335	diary	599	cud	540	coolest	490	names	445	playground	380	emo	359	braces	344	identity	339	adult	305	asian	264	glasses	261	smiles	241	chosen	236	pleasure	234	geek	233	named	231
1657	phone	14095	text	10515	calls	7191	texts	5986	messages	5819	call	3671	reply	2959	send	2860	message	2505	respond	1507	answer	1469	sending	1387	texting	1374	receive	1094	emails	954	txt	882	ignoring	852	texted	698	recieve	688	cell	592
1654	world	28365	place	4885	cruel	2464	fall	1516	matter	1151	changed	1019	crashing	858	living	811	fade	802	takes	783	disney	697	finding	614	shut	598	survive	589	breath	519	bow	492	paranoid	219	intentions	217	harsh	164	unfair	142
1655	stop	30892	dear	3832	won't	2357	making	2060	procrastinating	1402	hurting	1267	quit	1229	poking	1200	annoying	1010	acting	910	complaining	905	messing	715	putting	445	changing	412	bothering	383	pretending	366	bitching	361	planning	324	distracting	303	ruining	302
586	begin	11458	end	9637	kind	1097	begins	1028	endless	809	beginning	783	explain	748	process	734	madness	720	lives	673	festivities	662	eternity	595	craziness	530	prepare	465	silent	393	describe	370	began	334	reached	322	begun	316	imagine	311
587	you're	43910	don't	13575	there's	964	jealous	858	you'd	613	saves	504	bet	255	vain	229	life's	206	tells	179	clever	172	sweetie	145	pretending	83	tease	72	heart's	68	fifteen	52	impress	30	somebody's	21	explaining	20	blinded	19
584	alex	9493	jasmine	1471	walked	467	beast	316	barely	276	biggest	266	gosh	227	lifetime	191	cus	187	facing	185	escaped	168	jess	146	:'	146	smooth	144	legend	132	fears	122	atmosphere	120	cinderella	120	sweat	110	chose	107
585	law	14407	order	4818	illegal	2893	laws	1529	legal	1312	arizona	1249	citizen	1046	business	552	allowed	510	states	330	marathon	317	physics	303	required	300	banned	247	legally	237	criminal	217	government	213	ban	212	gravity	211	property	209
763	didn't	10313	eat	2891	mom	2640	parents	2135	survived	1890	kid	1651	wasn't	1439	played	1308	telling	962	bike	944	water	930	raised	788	trouble	754	drank	729	exist	706	wii	688	online	666	hose	650	xbox	644	dare	634
583	lol	16135	tho	5230	cool	4005	funny	2806	lo	2483	cuz	2315	kinda	2270	idk	1898	lmao	1431	hella	1394	mad	1265	haha	1216	crazy	1074	smh	928	chill	821	dude	800	def	745	yea	651	lil	539	ima	511
580	stronger	9280	makes	7105	kill	3862	doesn't	2999	bit	2757	smarter	2301	harder	2141	faster	1834	older	1675	longer	1639	bigger	1276	flag	897	wiser	855	grow	841	freedom	809	taller	804	doesnt	754	they'll	694	happier	612	easier	574
581	wait	25863	till	11532	can't	10177	cnt	4442	til	2574	friday	1795	tomorow	422	wed	268	nxt	196	cameron	195	tommorow	189	tmrw	170	wifey	55
1632	bad	28098	eric	4230	romance	3570	habit	1377	chemical	1320	influence	1172	habits	806	caught	623	revenge	515	pure	454	timing	430	laziness	218	girl's	178	moods	99	resting	95	lovers	90	motto	52	sticking	50	latte	47	dried	37
588	:@	4693	stupid	4484	bloody	3478	grr	2631	grrr	2619	>:	2059	pissed	1826	hates	1774	grrrr	1635	argh	1141	grrrrr	1050	annoyed	1023	grrrrrr	836	fed	584	grrrrrrr	575	ffs	483	angry	454	frustrating	371	urgh	347	piss	242
589	ninja	6294	awesome	3354	natalie	2965	skills	1930	port	1266	sneak	1070	apparently	601	style	556	warrior	506	ftw	428	pirates	400	saga	372	continues	342	attacked	341	badass	281	impressed	276	pirate	266	jealous	261	basically	245	skill	221
1633	hurt	7538	worth	6769	find	6115	suffering	4659	truth	4468	pain	4109	gotta	3218	end	2077	knowing	1801	painful	1604	worse	1438	bob	889	inevitable	776	worst	703	forgetting	610	lied	576	decide	554	losing	507	avoid	475	weren't	435
1634	day	23662	long	21462	ahead	6386	tiring	1690	exhausting	519	stressful	502	awaits	290	eventful	239	whew	173	looong	131	loooong	127	allll	79	alll	56	ridiculously	47
1348	im	37880	gonna	16707	dont	1934	ive	671	swear	513	havent	313	doesnt	178	tellin	128	joking	58
1635	friends	27383	family	19327	wonderful	3167	support	2064	blessed	1992	special	1531	relatives	1329	grateful	1289	helped	588	share	564	thankful	556	dearest	409	beloved	375	classmates	348	members	334	sharing	295	supported	284	surrounded	276	hugs	229	esp	222
1436	bed	13437	sleep	10750	tired	8349	night	5527	early	5351	tonight	3319	goodnight	2444	goin	2366	exhausted	1995	calling	283	hrs	169	zzzzz	145	worn	144	yawn	53	retire	27
1437	party	31538	house	6120	parties	2839	pool	2523	invited	2294	grad	2271	saturday	1494	graduation	1076	bbq	913	bday	811	xmas	739	invite	649	throwing	555	b-day	516	throw	469	tea	443	bachelor	430	directions	426	hosting	334	pity	309
1434	major	14664	minor	2393	headache	2325	officially	1291	huge	1194	changing	875	decided	766	problem	650	issues	565	bummer	469	possibly	383	slight	304	strike	276	switching	273	managed	256	drum	242	comeback	234	props	215	subject	182	subjects	175
1435	build	8114	building	5523	built	5428	walls	2086	bridge	1322	noah	1005	destroy	944	brick	878	takes	777	ground	652	construction	562	castle	559	snowman	553	blocks	544	foundation	496	destroyed	479	buildings	443	titanic	441	river	429	empire	396
1432	work	15740	till	7803	til	5694	pm	5334	working	3771	ish	2422	midnight	2346	workin	2184	noon	1625	close	1504	08:00:00 AM	420	visit	399	babysitting	325	8p	274	worked	266	staying	262	tonite	251	closing	251	prolly	106	eleven	62
1433	movie	17464	watching	16037	watched	5400	finished	3258	watch	3010	movies	1673	sad	1529	cried	1442	watchin	1279	notebook	1249	favorite	1249	film	1152	titanic	896	keeper	841	ending	840	documentary	792	sister's	784	depressing	484	grease	437	saddest	412
1430	shit	9111	ass	8567	bitches	7562	fuck	6087	bitch	5971	niggas	4097	nigga	3613	hoes	3539	aint	3116	yo	2904	hoe	2192	dumb	1500	fake	1381	fuckin	1238	yall	1093	ain't	1040	lmao	937	pussy	925	females	881	talkin	768
1431	shut	15179	mouth	12933	talk	1976	open	1923	talking	1832	brain	860	mouths	856	roof	602	keeping	575	equals	528	closed	460	nut	443	tells	409	chew	402	doubt	352	whine	339	breathe	282	remove	227	ck	222	lips	209
1380	mental	4127	disease	2045	emotional	1742	suffering	1681	disorder	1599	physical	1472	syndrome	1166	symptoms	1058	illness	963	depression	962	health	926	breakdown	775	case	772	insomnia	740	problems	736	severe	702	anxiety	696	effects	646	stress	596	suffer	537
1637	coming	23639	home	18200	visit	1936	comin	684	undone	451	awaits	404	wash	249	forgiven	238	they've	228	kingdom	194	arriving	106	daddy's	96	travis	74	shortly	73
1438	figure	10168	ou	10114	tryin	3833	find	2793	gotta	1883	stuff	1466	clue	1173	blues	1100	figured	994	funk	865	works	856	stressed	836	sort	794	tryna	761	workin	666	freaking	582	figuring	370	suggestions	311	worn	310	knocked	247
1439	singapore	2827	china	848	philippines	445	asia	430	passport	332	arrived	247	tour	169	travel	154	korea	130	centre	117	travelling	106	aug	99	thai	98	manila	90	tokyo	82	stadium	74	ss	71	pg	70	banned	39	superb	34
1260	slowly	10902	feel	5575	surely	4418	starting	2194	killing	1830	dying	1808	turning	1331	losing	1328	quickly	832	slipping	830	fade	774	fading	665	passing	607	kills	547	drifting	477	creeping	452	slip	437	dieing	286	sanity	270	realizing	268
1541	homework	28682	finish	2715	finished	2091	procrastination	1519	finishing	1295	due	1233	procrastinate	1220	assignment	1182	studying	1171	procrastinating	1038	math	729	laundry	672	assignments	644	tons	582	avoiding	552	attempting	515	chemistry	505	housework	426	motivation	403	productive	357
458	album	11636	cd	5204	listening	4264	songs	2745	song	2484	release	1434	listen	1299	itunes	1153	albums	1097	released	1041	record	965	bought	955	listened	926	recording	925	tracks	896	download	842	cover	818	track	756	downloaded	697	ep	586
1349	discovered	5785	found	5589	i've	4640	recently	2408	legend	2138	started	1385	apparently	1287	decided	936	newly	635	brutal	601	realized	587	realised	514	problem	492	discover	487	including	466	joys	375	decade	363	gravity	359	possibly	349	quickly	341
450	point	3824	bullet	3602	pull	2635	finger	2117	gun	1992	proof	1820	valentine	1548	trigger	1437	russian	1433	mirror	453	shot	441	bite	425	pointing	392	bend	385	pulled	341	loaded	338	pointed	276	cock	243	bullets	237	squeeze	233
451	hey	44162	guys	6322	arnold	918	whats	852	hows	494	how's	333	rockstar	210	heres	110	refuse	107	sweetie	100	nevermind	42
1342	time	35948	wasted	7388	wasting	5194	waste	3999	tim	920	precious	773	chasing	660	energy	417	useless	219	effort	217	eventually	210	valuable	210	efforts	123	strike	104	concerned	97	heartbreak	50
453	great	7397	lunch	5190	nice	4076	dinner	3947	family	3336	enjoyed	3179	church	3170	wonderful	2542	afternoon	2213	sunday	2143	kids	2117	evening	1522	shopping	1443	meeting	1348	hubby	1324	yesterday	1140	lovely	1022	relaxing	824	visit	692	spent	591
454	people	12405	gay	7703	status	4927	understand	4720	put	3920	won't	3447	disease	3361	acceptance	3216	cure	3107	hour	2938	copy	2427	paste	2168	equal	2143	choice	2089	rights	2040	children	1844	autism	1406	promote	920	related	655	yourstatus	23
455	de	11225	te	10586	el	9911	la	9680	mi	8514	en	7907	tu	7855	es	7819	se	5640	si	4798	por	4663	yo	3749	amor	3470	una	3187	con	3080	como	3052	para	3034	vida	2918	todo	2849	mas	2798
1346	back	17712	school	8970	pro	4213	tool	1646	lunch	1237	macbook	1144	fool	648	prove	608	packed	594	tied	528	academy	498	tools	417	tight	395	boots	340	bass	322	shed	236	mac	206	ohhhh	200	circle	159	procrastination	143
1347	im	18958	bored	11986	tired	7349	sooo	4312	hungry	4206	soooo	2815	sleepy	2669	sooooo	2369	ugh	1292	soooooo	638	bore	362	hyper	349	tire	244	sooooooooo	239	extremely	119	combination	104	sooooooooooo	67
517	work	20520	yay	6681	home	6342	tomorrow	5697	early	2604	booo	568	woohoo	375	headed	318	tgif	103	payday	102	yuck	88
1502	mad	27356	hell	1689	dammit	1250	skills	641	>:	635	props	343	dash	327	fabulous	284	saved	280	yawn	229	backwards	215	roman	192	luckily	191	sane	142	hype	122	spiders	113	awww	103	grrrr	96	spelled	90	driven	79
1503	friends	5144	facebook	5111	updates	3482	change	3309	click	2094	fb	1999	feed	1792	changed	1698	news	1633	options	1434	posts	1193	recently	1127	wondering	1092	noticed	1032	recent	943	default	930	edit	868	importantly	857	drag	813	dragging	746
1500	bar	15239	tonight	7787	drinks	1958	grill	1929	bars	1450	drink	1353	pub	940	karaoke	811	sports	628	lounge	623	pool	534	bbq	433	downtown	410	cocktail	392	beers	384	tonite	348	local	340	sushi	280	crawl	277	hopping	255
1501	loving	22435	life	10195	loved	1203	hating	1143	caring	1064	giving	1029	sharing	573	minute	542	absolutely	392	wanting	294	brings	248	warmth	230	atm	154	forgiving	130	unconditionally	109	sacrifices	100	supporting	59	affection	58	supportive	51	receiving	49
1506	faith	18782	god	10086	trust	2066	believing	1520	lose	930	doubt	929	knowing	872	belief	760	humanity	740	impossible	720	leap	714	confidence	589	sight	553	trusting	536	james	511	strength	506	testing	491	praying	419	god's	415	patience	409
1507	ha	69358	ke	2323	ah	935	aha	175	muah	137	mwah	130	louise	90
1504	dad	31325	mom	23396	parents	2305	brother	2066	told	1792	sister	1765	dad's	931	son	847	dads	804	step	644	helping	597	tells	431	grandma	404	talked	328	anniversary	324	moms	322	mom's	281	convince	273	yelling	247	conversation	200
1505	edge	3954	close	3278	remain	3159	silent	2595	standing	1875	closer	1742	stay	1524	longer	1490	forever	1137	pushed	820	doubt	750	farther	693	wondering	634	push	621	falling	464	fool	457	one's	453	anonymous	401	witness	378	remove	368
1508	bob	10130	dylan	3638	marley	2479	pointing	582	fingers	440	judge	430	fo	405	ross	390	evans	386	jay	383	boredom	363	hits	346	cases	290	silent	248	square	244	addiction	230	jammin	229	fa	216	strike	165	claim	107
1509	day	15578	enjoy	13977	hope	9200	rest	3348	enjoyed	2874	beautiful	2112	enjoying	1502	wonderful	1145	company	1059	lasts	373	enjoyable	269	enjoys	232	goodmorning	50	outing	35
658	event	7916	events	5079	current	1479	planning	1461	main	1038	activities	1034	unfortunate	952	series	751	attend	738	details	711	plan	686	happening	660	upcoming	611	attending	570	invited	566	reminder	530	exciting	503	involved	492	parties	466	today's	432
659	ride	5152	roller	3895	turns	3297	coaster	2426	derby	1720	emotional	1485	enjoy	1294	twist	970	flags	839	experiencing	741	rides	403	rode	339	rid	334	guaranteed	271	riding	267	emotions	238	unexpected	225	thrill	222	drops	214	kentucky	209
1992	ice	34123	cream	27581	eating	2386	chocolate	2212	cake	1760	whipped	1493	vanilla	1291	cone	783	cube	704	cookies	695	icecream	588	whip	564	truck	540	mint	525	strawberry	505	yummy	504	chip	475	bowl	415	craving	385	fudge	373
765	um	8774	yeah	6435	umm	4380	yea	3219	ummm	2762	pirates	2346	ummmm	1135	idk	911	heck	747	uhhh	584	excuse	395	uhh	318	nevermind	245	duh	238	stranger	176	nope	158	sorta	107	orlando	85	yeahh	43	bloom	39
1292	tim	26488	nap	1731	sleepy	746	waste	573	eric	224	curry	191	crunch	47	loooong	30
1376	wise	9647	man	6957	words	3567	wisdom	3076	fool	2571	men	2107	foolish	1937	knowledge	1856	fools	1705	understanding	1054	strong	1050	images	1044	proverbs	920	advice	620	fighter	483	lover	450	sadness	440	weak	440	clever	383	wiser	318
322	em	28361	gee	3235	hook	1394	shoot	743	firework	605	gig	406	barely	393	killin	387	horns	364	shove	263	push	248	comin	242	knock	229	colors	210	chase	200	burst	190	chills	161	fuzzy	149	fold	137	backs	118
323	can't	24383	anymore	12257	don't	9732	stand	3692	handle	2864	bothered	2442	won't	2139	complain	878	deal	801	explain	782	figure	583	afford	366	properly	188	cope	136	careful	134	resist	108	replaced	86
320	classes	16251	semester	8344	class	4891	college	3487	schedule	2798	summer	2425	registered	2030	taking	2018	online	1923	fall	1673	register	1457	spring	1254	officially	990	signed	886	credits	840	graduate	824	quarter	806	courses	798	registration	730	books	679
321	words	35845	actions	5702	speak	5285	thoughts	3211	describe	3179	express	2164	character	1882	louder	1780	habits	1779	word	1707	silence	1472	spoken	1277	wisdom	1173	action	1124	explain	1105	speaks	1053	destiny	880	feelings	773	speaking	615	encouragement	522
326	pie	12370	apple	8755	pumpkin	2614	apples	2612	making	2226	pies	1983	cider	1228	cherry	1130	picking	931	peach	678	cheesecake	675	pi	649	homemade	580	baking	554	caramel	549	crisp	488	sweetie	486	blackberry	477	delicious	470	lemon	455
327	dont	29127	wanna	24128	talk	4950	leave	2014	anymore	1575	cuz	1178	mess	370	bothered	166	cus	103	ughh	88	'	10
324	black	26284	friday	9933	ops	6251	rebecca	2256	shopping	1902	cod	1291	duty	1186	hole	1014	op	671	ps	499	holes	334	playin	298	walmart	298	berry	268	deals	229	zombies	216	sales	137	pre	101	campaign	96	wal-mart	59
325	dont	6458	somthing	1992	belive	1838	ill	1460	wont	1148	realy	1024	ther	873	didnt	872	ive	756	untill	658	iv	652	ment	613	isnt	590	happend	494	fucked	386	wasnt	368	dose	327	completly	300	wouldnt	285	couldnt	276
328	open	17647	door	7079	doors	6472	window	6189	windows	4315	close	3419	closed	1878	mic	1271	opening	1111	opened	917	closing	824	shut	821	bedroom	784	locked	743	curtains	681	opens	566	closes	565	bust	470	crack	446	wide	446
329	kill	24084	kills	2888	killed	2124	murder	1946	killing	1388	die	1325	swear	1058	dead	976	alive	705	boredom	497	thrill	474	murdered	402	torture	367	destroy	346	shoot	257	buzz	254	illegal	232	hunt	201	axe	200	brutal	197
1340	i'm	35590	don't	9981	i've	4206	liking	1719	curious	784	starting	682	creep	582	belong	558	weirdo	482	ignoring	389	notice	226	concerned	163	torn	61	fitting	19
1594	feet	12675	ground	3760	head	2360	tall	1684	sweep	1357	lift	1182	floor	1041	small	830	beneath	708	standing	676	clouds	594	spin	575	knocks	545	knees	518	lead	501	messed	489	bare	464	lay	418	rough	370	dragging	343
1341	college	19443	carrie	1945	student	1249	highschool	972	campus	927	community	815	dough	738	survived	614	career	600	students	544	remembering	417	entertainment	388	dorm	278	orientation	268	held	259	station	252	belly	220	roommate	214	buddies	209	hs	175
1995	age	9286	older	6908	young	6856	years	4955	grow	4189	younger	3021	kids	2426	generation	1822	adult	1441	growing	1231	adults	1094	children	1008	teenager	968	youth	863	kid	758	grown	744	teenagers	720	act	709	parents	626	mature	617
1592	kings	3467	delhi	1996	leon	1840	mumbai	1525	rocks	692	queens	500	reached	356	rains	261	phew	241	bak	211	travelling	142	royal	128	metro	128	indians	121	mahal	115	victims	106	whistle	99	temple	96	joining	93	warriors	77
1598	forgot	15429	totally	4719	oops	2488	realized	2438	mention	2183	remembered	1723	completely	1706	didn't	1560	yesterday	1388	missed	1217	supposed	803	crap	750	accidentally	727	realised	697	earlier	569	reminded	534	fm	454	forgotten	281	darn	253	accidently	234
995	semester	6236	grades	5422	final	4322	class	3306	classes	3276	a's	3096	grade	3016	finals	2773	passed	1963	quarter	1787	straight	1687	gpa	1562	college	1365	exams	953	report	600	posted	572	checked	432	midterm	405	passing	401	average	335
994	shit	12881	fuck	12845	fucked	9374	fucking	3585	damn	3070	ass	1738	fuckin	1047	bullshit	933	bitch	852	shitty	767	pissed	696	shits	514	dude	468	bitches	463	fucks	332	dam	295	pissing	290	asshole	228	pisses	183	atm	129
997	police	11592	officer	3449	arrested	2065	cops	1855	officers	1726	killed	1379	line	1121	streets	982	safe	944	cop	866	security	859	law	689	department	679	report	678	duty	602	station	575	robbed	518	development	474	jail	410	crime	391
996	doctor	11023	call	3176	bring	2162	told	1741	dr	1166	running	726	ordered	628	lawyer	340	checked	159	phil	145	amy	108	bbc	104	joker	102	cleared	84	quicker	74	companion	64	thankfully	38	assistance	20
991	ni	5636	aku	5212	yg	3211	la	3151	dah	2615	kat	2014	ke	1794	tak	1793	org	1704	tu	1702	balik	1418	tp	1354	je	1310	hari	1278	aq	1271	lagi	1208	ada	1152	huhu	1105	lg	1080	pun	1058
990	time	33588	nap	7357	long	5828	needed	2216	relax	716	longest	299	loooong	295	looong	252	welp	32
993	william	6415	obsession	2124	shakespeare	1445	object	1255	arthur	1091	finds	849	objects	617	cherish	376	quote	363	achieve	299	matthew	286	blind	265	seek	231	tops	193	blake	180	troubles	179	drops	173	affection	171	smooth	163	painted	148
992	i'll	12404	guess	9188	that's	2221	gravity	2023	it'll	913	goodbye	634	guessing	417	suppose	398	sooner	289	else's	201	limits	174	accepting	174	leap	153	odds	81	elses	51
999	phone	10913	charger	4760	laptop	4638	dead	4572	battery	4388	charge	3085	died	1716	camera	1344	computer	1315	cord	1296	batteries	1280	forgot	1160	ipod	1156	broke	1080	charged	787	low	744	charging	733	phones	723	cell	686	plug	577
998	dance	39178	floor	3483	music	2411	moves	1445	dancing	1333	sing	1262	rhythm	983	chance	723	dancers	694	dj	635	crew	619	central	616	dances	581	danced	483	dancer	417	studio	396	competition	325	revolution	311	routine	303	wii	285
120	thing	8037	amazing	7162	world	6945	you're	5485	there's	4325	change	4079	face	3863	smile	3214	girl	2643	stops	2161	awhile	1579	stares	1198	ar	891	coz	413	smiling	257	amazin	167	importantly	91	tail	78	compliment	78	scale	75
121	matter	20066	doesn't	13392	matters	4342	person	3184	care	2191	doesnt	1926	fact	1709	opinion	1433	realize	788	situation	748	count	705	meant	600	important	560	someone's	376	cares	324	painful	297	person's	231	distance	184	opinions	172	concern	171
122	minutes	13569	ten	8636	years	3165	percent	3126	twenty	2944	thirty	1934	seconds	1501	eleven	1466	fifteen	1392	hundred	1136	minute	942	spent	864	twelve	859	fifty	678	pleasure	585	skill	560	o'clock	431	sixteen	231	literally	222	spare	217
1026	yay	5521	excited	5369	finally	4384	woohoo	2315	cap	2215	graduation	1882	coming	1791	weeks	1771	braces	1627	dressing	516	picked	272	excitement	259	ordered	241	exciting	238	rehearsal	205	graduate	199	yayyy	181	wax	112	yaaay	104	kings	95
124	comment	11208	words	10758	status	6991	note	5768	wake	5430	copy	5287	play	5020	paste	4759	jail	4717	fair	4293	sport	2850	harder	1970	woke	1415	ward	1377	police	734	reads	508	thin	344	egg	249	responses	195	yourstatus	38
125	clean	24993	house	14760	room	8952	mess	3677	cleaning	3214	messy	1694	laundry	1417	cook	801	fresh	783	tidy	680	apartment	644	cleaned	544	pack	454	helping	442	organize	423	kitchen	371	organized	359	dirty	307	cleanin	289	rooms	260
126	leave	15666	memory	4162	remember	3137	message	2929	beep	2752	doesn't	2193	matter	2001	lane	1885	knew	1273	comment	1108	reasons	620	empty	400	film	367	tone	276	legacy	100	runner	76	records	71	responses	70	horn	53
127	time	27704	waste	13620	mo	1013	space	791	precious	728	complete	677	minute	668	total	639	energy	624	lover	409	biggest	250	pointless	242	shawty	165	rewind	129	worrying	122	valuable	75	oxygen	69	explaining	33
128	can't	32968	wait	18206	decide	6090	imagine	1709	figure	1051	concentrate	122
129	funny	7902	hot	6856	rate	6823	marry	6768	crazy	6587	i'd	6573	random	6524	cute	6370	amazing	6060	moody	5602	fit	5415	talkative	5088	spoiled	4627	sarcastic	4575	copy	4033	dumb	3978	type	3533	tough	3491	mouthy	3480	08:00:00 AM	2910
722	happy	27124	thanksgiving	16685	turkey	9287	thankful	935	feast	693	holiday	632	stuffing	473	stuffed	414	holidays	405	parade	351	oven	152	canadian	148	ham	108	coma	107	dinners	92	traditional	64	tradition	64	pies	52	indians	48
723	tears	17337	eyes	9210	cry	7809	tear	6689	smile	4322	pain	3187	shed	2768	crying	2392	cried	1904	wipe	1638	dry	1220	fears	1217	hide	1134	smiles	693	brought	589	cries	579	brings	522	laughter	498	cheeks	449	replace	448
1645	american	3972	british	3176	accent	2259	history	2103	asian	2029	america	1935	russia	1749	country	1553	western	1500	african	1247	americans	1224	native	1100	culture	957	china	931	russian	842	ancient	831	european	813	roman	803	europe	784	indian	488
1644	it's	24975	time	16815	guess	4088	hard	4040	unbelievable	252	day's	150	leaves	140	surprising	94	sorts	18	woooooo	16
1647	mark	16521	points	4147	marks	2132	question	1624	bonus	975	twain	786	stretch	523	brownie	398	period	283	spot	242	repeat	235	halfway	230	brilliant	197	earned	175	pause	120	quotes	117	earn	115	reference	109	calendar	103	influence	99
1646	breaking	5762	benjamin	2988	loves	1851	franklin	1761	dawn	1524	safety	900	habit	701	roosevelt	446	ben	415	deserve	397	liberty	376	grace	366	proof	355	quote	351	mistaken	246	pleased	237	puppies	231	temporary	215	entering	211	essential	169
1641	black	5497	show	3357	eyed	3066	peas	2407	half	2072	usher	499	sucked	492	ruined	465	horrible	372	superbowl	340	terrible	301	murder	294	performance	275	awful	245	everybody's	111	sounded	101	perform	93	ruining	89	carrots	79	touching	74
1640	night	26568	good	26163	mornin	1095	al	830	sweetie	31
1643	wine	20964	glass	7671	bottle	7535	drinking	3224	red	2838	drink	2572	champagne	1327	bottles	1296	beer	1248	glasses	1054	tasting	986	enjoying	819	drank	695	cheap	551	sip	446	sipping	357	whiskey	352	large	325	vodka	300	cider	256
1642	wanna	44065	dont	5376	join	2330	hang	1452	chill	1016	kinda	921	somethin	803	badly	580	dun	287	lemme	174	takers	83	hangout	60	lend	55	skip	53	jogging	42
1649	times	29622	good	22670	multiple	1270	remembering	646	we've	577	roll	457	shared	253	listened	233	repeat	233	reminded	184	charm	178	laughs	177	reminds	165	dozen	141	countless	134	goood	104	drunken	80	led	52	rats	45	symphony	41
1648	i've	26176	learned	8142	lot	3507	things	3391	words	1807	conclusion	1199	forgotten	1182	past	1029	sum	865	recently	667	turned	568	learnt	516	noticed	431	lived	368	dealing	280	places	238	regret	233	blame	211	realised	195	experienced	192
728	makes	26522	feel	12533	difference	2135	easier	958	sense	896	whiskey	620	corn	505	knowing	469	stronger	440	happier	387	powerful	217	facts	185	cope	183	puke	168	enjoyable	167	attitude	161	imagination	160	grief	139	worries	139	laughter	124
729	weather	14380	cold	9756	rain	8069	rainy	4062	sunny	3483	windy	1992	cloudy	1933	warm	1698	raining	1310	forecast	1256	wet	1231	sun	1185	gloomy	1168	sunshine	1106	freezing	956	degrees	905	wind	793	dark	760	fog	558	clouds	552
579	woman	3703	man's	3468	length	1993	men	1803	takes	1656	thumb	1638	pass	1620	woman's	1585	entire	1531	side	1508	hold	1476	women	1450	stand	1408	penis	1378	loved	1332	beats	1254	read	1217	faster	1216	human	1210	balance	1210
578	wife	13789	husband	10859	kids	3542	bah	3447	wonderful	2051	future	833	daughter	799	hubby	749	honey	462	darling	420	girlfriend	375	asks	339	wifey	234	replies	221	sweetheart	206	husbands	174	pregnant	165	wif	161	puts	158	error	141
573	day	18418	great	16571	today	12565	yesterday	5232	helped	1708	wells	20
572	van	7492	lisa	3310	vincent	1219	mini	1099	hah	941	der	684	dam	257	amazin	216	jean	189	whoa	172	henry	164	eric	140	attempt	139	heather	104	anna	101	accomplish	88	eddie	86	horn	84	guaranteed	81	creeper	80
571	crack	7431	lo	5832	lol	5185	dawn	2828	lmao	1559	wack	912	butt	879	heads	798	ahhh	747	swear	683	cracks	624	cracking	594	everytime	511	lame	424	bet	329	hahahaha	298	whore	283	whip	250	hahahahaha	226	bs	193
570	send	7275	mafia	6263	gifts	5202	farmville	4740	wars	4133	gift	2932	requests	2608	sending	2547	request	1408	accept	1164	cafe	1061	games	944	add	902	invites	767	return	690	neighbors	687	items	512	treasure	435	neighbor	415	farm	410
577	send	10734	email	9745	message	7686	contact	4187	address	3982	interested	3977	info	2770	details	2047	e-mail	1808	information	1448	asap	1292	mail	1164	yahoo	1156	inbox	1126	emails	806	sending	796	reply	703	private	597	msg	527	received	501
576	o.o	6669	-.-	5353	>.<	3164	>:	2304	omg	2195	wtf	1754	-_-	1007	d:	858	o_o	858	^.^	729	wth	681	thingy	510	>:d	505	xp	453	btw	388	heck	375	lmfao	347	gah	318	dx	311	dunno	286
575	i'd	25527	thought	7097	you'd	6686	didn't	2783	knew	2201	wouldn't	2071	we'd	1786	weren't	1164	they'd	1019	prefer	853	it'd	789	meant	623	hoped	617	wasn't	611	he'd	508	forgotten	463	she'd	454	lying	434	bet	312	promised	262
574	leaving	15150	tomorrow	9723	morning	4259	packing	4240	leave	2497	florida	1796	excited	1775	trip	1001	weeks	960	heading	829	thursday	827	vacation	802	airport	614	leavin	578	wednesday	557	cali	547	chicago	487	finishing	435	packed	401	california	361
1209	child	4800	stopped	2483	tiny	1834	late	1831	crying	1722	mommy	1542	hit	1428	loving	1251	starts	1162	open	1159	sheets	1126	beating	869	walked	816	showing	803	mummy	732	sheet	731	lipstick	695	bedroom	616	anger	450	regrets	434
1208	april	11191	vampire	4755	fools	4655	diaries	2121	joke	2068	fool	928	showers	499	flowers	362	knight	348	prank	266	fooled	251	jokes	236	academy	173	catching	166	horses	153	pregnant	149	supernatural	138	lesbian	136	killers	112	engaged	64
1421	understand	16082	explain	3767	doesn't	3350	concept	1847	understood	1815	realize	1804	meant	1668	fully	1469	difficult	1398	understanding	891	understands	881	heard	823	simply	671	meaning	609	simple	526	grasp	477	explaining	428	terms	406	logic	388	feelings	368
1420	god	15930	damn	12442	swear	6062	fucking	3457	dammit	2539	damnit	2401	puff	1254	powder	982	damned	448	dam	399	piss	357	pissing	147
1997	drugs	5810	drug	5720	addiction	2964	alcohol	2222	addicted	1664	crack	1323	addict	964	rehab	947	caffeine	761	addictive	645	legal	579	illegal	579	dope	552	pills	489	sell	463	medical	351	weed	284	dangerous	271	prison	218	dose	209
1422	sex	17724	rape	2663	sexual	2530	drugs	1214	porn	1211	vagina	1208	aids	1146	penis	870	opposite	590	raped	589	violence	464	pregnant	361	orientation	338	oral	305	virgin	255	naked	234	male	201	awkward	200	scene	199	considered	199
1425	blah	37609	death	1212	foster	770	killed	683	attack	569	related	541	unity	532	continue	527	brings	524	hatred	447	division	422	army	399	ish	385	terrorist	381	citizens	373	magical	369	ghosts	48
1424	yeah	41014	fuck	6263	hell	3397	hells	913	ooh	165	boi	107
1427	life	12581	reason	4364	chance	4323	short	3736	easy	3668	worth	3096	forget	3001	wake	2808	regrets	2641	treat	2582	promised	2260	grab	1861	hands	1702	agree	1268	one's	555	assistance	500	cash	415	kentucky	407	life's	356	law	306
1426	xa	252432	daughter	894	daughters	263
1429	feel	14634	giving	10855	free	10514	letting	1775	lent	890	return	695	held	604	anytime	522	accepting	360	content	266	gain	262	receiving	245	exchange	201	meaningless	137	they'll	137	givin	120	grew	97	overcome	91	compliments	83	alicia	53
1428	da	3254	nw	3169	gt	2801	wrk	2619	bt	2198	jst	2109	cnt	2054	nt	1897	bk	1741	frm	1694	jus	1621	dis	1558	nxt	1532	wk	1346	gud	1121	hav	994	dnt	797	stil	765	bak	721	tym	720
731	things	33543	aren't	2217	happening	1603	small	1367	plan	1249	accomplish	1218	bigger	1127	planned	991	act	726	strange	555	arent	530	holding	466	differently	395	smallest	349	letting	276	realizing	208	enter	201	smoothly	195	biggest	183	circle	174
730	conversation	8942	talking	8209	talk	5336	interesting	2706	conversations	2292	convo	1100	random	1075	awkward	825	talked	757	deep	597	argument	526	actual	469	talks	424	topic	385	skype	334	intelligent	323	texting	310	intellectual	308	arguing	298	pointless	283
733	hear	14936	sound	12344	voice	4123	speak	2294	light	1780	faster	1448	travels	1078	bright	1041	roar	997	sounds	830	listen	818	silence	723	quiet	651	heard	639	heartbeat	584	screaming	569	everytime	515	voices	513	carry	387	familiar	331
732	listen	11631	talk	10506	don't	6765	sit	4072	hear	2507	telling	2087	speak	1890	walk	1463	advice	1343	talking	960	shut	824	tells	659	spend	526	quit	503	stories	477	carefully	460	pretending	379	everytime	367	teaching	303	depending	225
735	double	16108	du	2828	triple	2325	rainbow	1760	trouble	1012	freak	660	dose	568	workin	444	digits	437	standard	435	shift	432	standards	431	dutch	422	intense	406	feature	384	chin	336	overtime	223	stack	201	xp	195	threat	186
734	kids	29851	play	2005	taking	1713	toys	1668	blast	1200	playing	1171	kid	1099	adults	1002	park	668	kiddos	639	playground	567	bunch	535	babies	467	pool	421	thier	373	hubby	335	helping	300	zoo	272	picking	234	picked	222
737	burger	4917	fries	4541	mcdonalds	3447	french	3272	burgers	1639	ate	1621	order	1571	cheese	1523	eating	1461	mcdonald's	1290	double	1132	subway	1095	chicken	1068	meal	1030	hamburger	966	king	866	large	851	bacon	850	craving	710	kfc	684
736	fine	19336	alright	3424	perfectly	1385	everything's	1345	line	1216	print	767	everythings	754	mighty	641	it'll	561	pretending	531	pretend	364	fin	292	worried	213	arts	211	worrying	207	everybody's	194	helped	189	spots	177	emotional	164	whatsoever	149
739	leg	6561	arm	5088	knee	4262	left	2787	hurts	2548	bruise	1552	shoulder	1549	muscle	1374	bruises	1338	sore	1326	bruised	1123	pulled	1109	ouch	885	torn	834	huge	694	elbow	675	surgery	666	fell	619	foot	603	injured	552
738	hours	13328	couple	12512	days	10839	weeks	4359	ago	3791	minutes	3485	months	2678	spend	1463	happened	1008	move	865	pieces	781	situation	568	seconds	401	floor	397	could've	374	beers	349	would've	332	perfection	103	should've	89	happend	32
1359	confused	13926	confuse	2739	confusing	1125	totally	1068	convince	1008	figure	901	exception	897	swear	651	explain	555	frustrated	494	supposed	488	completely	443	confusion	428	darling	425	exist	384	tells	340	clue	331	promised	303	expert	289	slightly	252
1358	good	23352	morning	14335	day	8388	hope	4741	fb	2956	blessed	1187	fam	605	pleasant	306	doubt	302	kills	167	:-	157	habit	156	breaks	136	poison	112	friendships	107	sword	76	remeber	13
469	team	11654	cheer	5949	competition	1445	dance	1230	practice	1148	squad	978	cheering	910	mates	639	drill	619	coach	605	support	580	comp	484	leader	479	tryouts	432	swim	391	meeting	374	members	324	captain	302	cheers	274	relay	229
468	girl	29411	gossip	3157	scout	2759	cookies	2338	thin	575	girly	545	selling	435	cookie	334	xoxo	253	prettiest	201	boxes	158	daddy's	151	murdered	124	orders	117	mint	112	barbie	91	daisy	64	sissy	63	loyal	61	marcus	52
465	sydney	4001	australia	3245	melbourne	2491	oi	2102	zealand	870	keen	651	uni	638	australian	596	mates	391	mate	284	arrived	228	sleeps	222	rugby	198	massive	196	port	177	victoria	156	travelling	154	blues	151	xo	114	feb	114
464	didnt	17964	thing	4432	wanted	3602	realise	1839	planned	841	missed	747	bc	732	notice	486	wouldnt	348	gah	251	definately	213	=	213	dunno	169	existed	165	sm	152	atleast	112	warn	86	morn	57	jacked	54	wrecked	31
467	who's	19825	guess	10355	coming	4533	thumbs	2227	guy	1745	whos	1291	idea	728	boss	525	pointing	28
466	hate	22011	ugh	14789	:	1241	grrrrr	497	officially	482	effing	339	frustrated	313	waking	276	fuckin	263	frustrating	259	bein	240	lame	168	effin	146	mornings	126	dentist	120	;	118	dmv	61	dread	49
1357	golf	7438	mini	2281	donuts	2184	ultimate	1656	playing	1446	played	1259	donut	1036	disc	1014	holes	832	round	750	cart	593	clubs	557	tournament	534	hole	501	balls	317	par	225	pub	215	dozen	146	rounds	132	outing	127
460	show	8585	fashion	5693	style	3067	oprah	1473	magazine	1219	model	1179	models	898	latest	659	coco	637	trend	574	shoot	560	cover	545	shows	495	issue	421	fabulous	340	famous	313	designer	288	make-up	283	makeup	270	classy	266
1355	awake	25219	stay	9075	sleep	8391	wide	7308	sleeping	1516	asleep	1427	sleepy	779	keeping	715	insomnia	607	staying	508	midnight	356	dreaming	297	fully	274	struggling	180	o'clock	114	sleeps	108	caffeine	100	naps	74	redbull	73	snoring	53
1200	end	4293	that's	4267	thinking	3936	means	3438	long	2986	hard	2766	fine	1997	word	1906	ahead	1857	dare	1460	terms	1433	argument	1407	women	1380	deadly	1248	shut	1234	permission	899	worried	893	pay	880	woman	799	screw	737
1273	foot	10002	put	3896	glass	3304	left	2180	shoe	1349	stepped	1203	dropped	1169	putting	1077	hand	891	feet	882	floor	871	piece	801	step	747	front	731	walking	713	mouth	674	tall	641	throw	558	bare	539	threw	515
1519	memories	11882	remember	4406	forget	3999	past	3982	memory	2431	times	2179	moments	2113	forever	2074	forgotten	1565	shared	1396	moment	1324	fade	1224	remembering	1188	happiness	1026	treasure	996	feelings	992	cherish	941	finding	686	forgetting	665	erase	629
1518	people	29745	hate	5645	stupid	4638	annoying	3070	piss	2829	annoy	1499	stfu	1453	annoyed	994	pisses	664	assume	593	honestly	589	constantly	476	rude	395	ignorant	346	insist	322	irritating	301	annoys	278	idiots	272	arent	261	ignore	247
1515	girl	32586	boy	25281	meets	935	naughty	522	girl's	426	type	412	kissed	408	marry	407	teenage	324	silly	302	shy	283	downtown	270	gal	220	girlfriend	191	ooh	172	cries	150	poorly	145	impress	134	awwww	132	whispers	96
1514	good	27460	times	26036	bad	7800	memories	576	row	544	intentions	151	goooood	99	nearest	82	remeber	68	gooood	63	freaky	30
1517	im	16496	dont	15751	anymore	5911	idk	4818	confused	1686	whats	1435	wont	1242	isnt	1002	alot	887	honestly	868	idc	851	mad	764	ive	699	upset	404	arent	275	clue	240	depressed	208	stressing	94	uhhh	61	confuse	56
1516	time	26562	wow	5268	fast	4718	flies	4613	months	3526	passes	930	quickly	811	fly	786	flying	464	flew	343	dropping	287	passing	251	belive	182	arrow	100	beleive	74	buildings	32
1511	blind	5448	show	2066	deaf	1610	dangerous	1393	boys	1098	dead	1045	touch	974	dumb	860	spell	772	it'll	645	middle	458	backwards	450	store	423	shot	394	impossible	383	popular	354	rush	338	treated	327	dirt	326	entertain	321
1510	evil	2146	sin	1888	anger	1228	pride	1111	wrath	1016	greed	962	hatred	914	lust	821	sins	783	destroy	716	pure	714	deadly	632	lies	628	envy	627	proverbs	598	enemies	521	wicked	507	enemy	478	destruction	432	innocent	423
1513	license	6478	pass	2551	border	1719	drivers	1644	permit	1500	driving	1460	dmv	1319	drive	1232	plate	1157	slave	1077	driver's	1045	labor	916	cross	728	plates	709	shot	660	manual	633	carry	587	korean	562	health	530	education	527
1512	trey	2789	lovers	2007	silly	461	passionate	397	sighs	343	usher	298	lover	289	madness	218	repeat	161	drake	121	alike	66
281	completely	12628	totally	7962	absolutely	2524	exhausted	2414	utterly	1991	forgot	1179	ruined	973	destroyed	948	fucked	895	screwed	716	amazed	631	completly	594	disgusted	498	shattered	474	shocked	449	fed	444	entire	385	satisfied	358	clueless	358	wrecked	352
1735	carlos	1367	jennifer	760	garcia	743	michelle	679	jessica	620	alex	556	ashley	553	tiffany	476	lopez	427	andrew	417	christian	388	stephanie	383	melissa	378	eric	356	jonathan	349	alexis	309	monica	299	nicole	295	aj	288	daniel	281
1275	sooner	5140	realize	4719	realized	3113	start	2994	thought	2609	suddenly	2019	didn't	2007	moment	1101	immediately	892	housework	722	expected	570	order	466	realization	390	realizing	384	beginning	341	destroying	291	we'd	250	nearest	223	realise	177	symbol	173
280	bt	6766	dat	6464	ur	5641	wen	4059	nt	3841	lyf	3352	lyk	3056	luv	2878	dnt	2680	dis	2344	cn	2335	wid	2321	sum	2276	dey	2269	hav	2183	knw	2179	hv	2140	jst	2085	wat	2076	tym	2062
582	ali	3291	khan	2122	bin	267	wan	192	maria	175	sara	162	baba	153	pakistan	145	guyz	121	wif	110	thnx	107	specially	103	nada	83	md	77	terrorist	40	outing	35
357	win	8971	won	8648	contest	5201	prize	3756	lottery	2546	winner	2020	winning	1805	competition	1588	entered	1205	ticket	1070	wins	928	winners	910	vote	899	chance	892	tickets	858	enter	809	numbers	472	scratch	454	bingo	419	draw	419
356	area	3651	seattle	3254	portland	2193	downtown	2116	city	1929	visit	1921	town	1831	heading	1536	oregon	1071	chicago	1045	places	803	surrounding	655	areas	646	center	603	maine	580	visiting	572	denver	548	washington	515	tour	473	detroit	463
355	bed	15443	lay	9359	sleep	5776	head	4562	tired	2806	rest	2215	bout	1978	laying	1693	lying	1074	wake	1026	sleepy	837	awake	833	pillow	761	laid	371	layin	263	cuddle	252	awhile	245	picking	187	tone	175	prolly	162
354	strong	15622	weak	9467	makes	2362	stay	1927	strength	1919	giving	1750	means	1608	letting	1543	holding	1516	knees	833	choice	733	knowing	706	stronger	676	wanting	650	weakness	601	ashamed	579	comfortable	467	forgiveness	467	forgive	467	including	429
353	concert	8973	tour	6273	bands	1367	tickets	1347	band	1253	pit	1006	paramore	952	crowd	731	disturbed	724	muse	716	rocked	703	stage	659	concerts	400	grace	342	blink	313	fest	312	cd	312	august	299	stoked	285	october	276
352	special	11059	children	6192	leave	5531	week	5308	hour	4484	accepted	4163	post	4020	education	3939	request	3661	kids	3541	unique	3323	honor	3084	sick	2710	aren't	2338	gross	2224	learn	1247	situation	925	contagious	796	differently	759	faced	726
351	game	11209	yankees	4467	win	4098	giants	3913	series	2910	rangers	2747	baseball	2575	sox	1732	won	1488	twins	1212	season	1160	fans	1112	fan	646	texas	640	opening	611	yankee	596	winning	559	tigers	544	boston	518	stadium	514
350	game	6996	football	2691	beat	2296	tigers	2237	auburn	2047	win	1926	alabama	1789	state	1652	sec	1355	texas	1335	team	1210	florida	1138	fans	1095	won	1018	championship	962	bowl	884	oregon	814	national	640	tennessee	595	wins	558
359	pick	17624	drop	6088	picking	3496	airport	2839	waiting	2296	dropped	1822	picked	1737	dropping	1235	line	1046	floor	490	headed	389	picks	381	nose	377	lines	285	walmart	281	jaw	219	i'ma	160	pace	152	fights	149	draft	139
358	=	5556	cute	4999	i'd	4058	date	3726	kiss	3602	rate	2932	funny	2434	smart	2227	random	2068	tough	1609	marry	1463	attractive	1301	hug	1282	ugly	1246	chill	1067	scared	1014	fit	998	stranger	919	8	855	jerk	846
1447	omg	9612	omfg	4535	freaking	2616	soooo	2298	wtf	2269	ahhhhh	1736	ahhhh	1189	ahhhhhh	1064	freakin	1047	ahhhhhhh	924	sooooooo	917	fml	887	soooooo	801	soooooooo	338	d:	290	>_<	273	lmfao	269	effing	254	noooooo	247	noooo	174
1446	pull	9902	pulling	4873	nighter	3390	pulled	3254	pulls	568	plug	504	trigger	371	strings	362	weeds	339	threw	325	managed	290	pushed	276	pushing	276	covers	251	gravity	248	string	189	muscle	174	prank	160	wire	143	crawling	128
1445	part	32297	worst	4687	parts	2175	favorite	1314	ii	481	huge	399	hp	349	minus	287	saddest	285	waking	282	someone's	204	hangover	200	solution	162	process	154	skip	153	basically	135	actual	128	disturb	105	witness	74	iii	73
484	top	29732	gear	2758	bottom	2560	lungs	1816	lap	1428	ten	1104	list	914	chef	728	tank	640	scream	637	tip	628	cherry	522	screaming	488	shelf	487	singing	457	spot	453	roof	414	reach	364	tops	361	gun	238
289	kiss	11272	touch	6296	lips	5062	eyes	2761	hold	1511	hand	1139	kissed	961	mine	917	taste	854	soft	833	cheek	819	warm	807	breath	784	kissing	777	skin	755	arms	735	smiles	692	kisses	689	hugs	649	beauty	646
288	back	11912	iam	3544	track	1202	table	439	rewind	427	life's	316	cars	240	tommorrow	213	cable	157	lifes	138	yippee	52	remeber	44
1444	real	33846	world	5376	deal	982	realize	934	keepin	456	recognize	423	lies	390	meeting	362	monsters	360	virtual	357	actual	347	imaginary	246	agent	232	unreal	225	contact	207	built	193	reaction	170	realise	155	apologize	131	ghosts	118
1793	acid	1492	body	1271	brain	901	chemical	797	natural	658	oxygen	572	chemistry	559	liquid	474	process	430	energy	425	cells	424	science	372	reaction	370	levels	348	element	338	produce	331	common	304	humans	294	form	292	discovered	280
5	car	11198	cop	3952	cars	3286	parking	3105	ticket	2761	driving	2712	pulled	2704	cops	1991	street	1729	front	1563	police	1452	parked	1401	drive	1385	speeding	1345	park	1287	spot	1074	traffic	1046	drove	990	window	826	lights	760
283	japan	7284	earthquake	5640	tsunami	3220	pray	1841	affected	1598	disaster	1403	hawaii	1235	prayers	1122	hurricane	1099	praying	957	haiti	916	japanese	904	natural	802	earthquakes	737	victims	703	flood	656	tokyo	611	pacific	594	damage	548	chile	493
282	thought	9968	heaven	4818	silence	4810	yesterday	4755	speak	4041	memories	3727	hear	3479	frame	3436	part	3330	picture	3140	voice	2744	memory	2153	arms	1452	repost	1201	keeping	1069	re-post	552	tough	437	holidays	402	fatal	76	telephone	57
285	human	8930	beings	2890	nature	2488	spiritual	1740	experience	1242	compassion	1093	sense	1022	existence	1021	reality	1012	universe	943	humans	928	physical	802	divine	796	individual	752	humanity	746	lama	729	understanding	714	spirit	712	create	703	natural	655
284	tv	5046	player	4213	dvd	3718	screen	2371	bought	2079	inch	1891	cd	1787	computer	1542	flat	1537	laptop	1473	set	1445	hd	1194	ps	953	record	771	cable	668	hooked	645	monitor	636	sony	621	borrow	607	sound	549
287	focus	7396	desperate	5226	real	3399	distracted	1466	easily	1295	distraction	868	concentrate	845	focused	762	keeping	531	atlanta	472	focusing	424	atl	402	hopeless	317	attempt	246	obsession	218	depend	203	unable	188	nyc	170	ford	164	shiny	141
1442	feel	12075	bad	8713	fit	6144	sad	4351	isn't	3164	perfectly	2542	doesn't	2524	hands	1252	fingers	1082	spaces	1013	fits	943	silence	813	idea	791	isnt	505	throwing	480	twist	231	package	150	complex	118	fitting	31	alternative	24
1441	greatest	11910	world	10230	worlds	3643	world's	2710	biggest	2667	history	1595	entire	1321	possibly	1077	worst	985	largest	968	smallest	823	invention	775	longest	635	accomplishment	606	record	579	constantly	522	eve	513	gift	486	hits	407	pleasure	378
1116	couldn't	15908	couldnt	5420	happier	5396	find	4745	thought	2449	worse	1832	possibly	1715	asked	1548	imagine	1528	wanted	1157	resist	756	figure	740	honestly	506	handle	349	bothered	329	sooner	284	nicer	132	afford	108	imagined	108	slower	107
263	school	22253	tomorrow	9611	closed	4068	schools	4006	snow	2757	kids	1874	cancelled	1142	district	1065	cancel	913	canceled	703	county	660	delay	618	tomorow	593	school's	530	due	517	supplies	467	grad	390	public	329	buses	218	website	217
262	made	10205	glad	6873	ace	2118	lord	2006	rejoice	1394	whew	575	tot	352	base	103	hath	68	cakes	65
261	life	18206	makes	10758	interesting	6360	fun	5056	living	4528	week	4481	worth	4411	son	3968	blessing	3909	daughter	3102	copy	2551	paste	2345	sister	1606	lap	1602	sons	1168	generally	1150	daughters	892	meaningful	258	challenges	248	names	222
260	wedding	21601	married	2579	royal	2095	congrats	2011	planning	1689	reception	1640	dress	1483	congratulations	1211	ring	1128	bride	1120	engagement	576	ceremony	560	cousin	540	engaged	446	maid	440	cousin's	386	sister's	383	dresses	372	rehearsal	363	marry	310
267	mah	7163	meh	6305	teh	2824	gots	1061	ish	904	gawd	551	lolz	518	ima	474	imma	444	wif	438	iz	358	babe	327	^_^	315	>.<	272	tis	255	d:	222	;d	187	o.o	175	yah	156	^.^	151
266	george	11182	ck	3207	bush	2403	washington	1840	lucas	1070	lopez	870	quote	829	sh	817	curious	658	general	636	fred	313	president	265	electricity	209	source	195	mason	192	ford	177	bastard	154	jungle	152	confidence	127	beds	124
1792	life	29705	live	19956	enjoy	4716	moment	3950	short	3605	fullest	2711	regrets	2002	everyday	1532	living	1320	chances	752	cherish	700	regret	547	life's	463	granted	445	avoid	320	lifes	318	embrace	280	bullshit	250	lived	249	lasts	237
264	i've	36170	missed	7138	decided	6986	felt	1888	times	1563	realized	1437	lost	1280	fallen	915	entire	387	awhile	371	managed	340	conclusion	338	failed	303	shown	233	beaten	216	career	198	thee	173	wanting	150	trusted	145	searching	137
269	home	20853	back	10196	finally	4674	hospital	4133	brought	3754	glad	3698	coming	2258	visit	948	visiting	724	headed	615	visits	175	resting	166
268	eclipse	8529	midnight	6110	twilight	4477	watch	3863	moon	3368	showing	3226	movie	2862	lunar	1759	zone	1291	total	1290	hp	635	saga	630	snack	598	trailer	580	premiere	542	theater	402	dawn	401	marathon	364	breaking	361	transformers	357
1290	sick	31727	hate	5767	feeling	4826	:	4191	sucks	3229	ugh	3069	hates	1626	sickness	867	feelin	809	bein	612	=	497	puppies	481	bleh	422	worse	338	yuck	284	bueno	202	healthy	138	stinks	109	allergies	66	dx	25
1291	pool	17110	swimming	14421	swim	6785	water	2150	suit	613	bbq	577	dive	514	adult	490	drowning	472	diving	451	drown	417	laying	385	jump	369	lake	360	ocean	356	dip	341	lessons	336	dolphins	322	river	322	jumped	297
1296	curse	4898	escape	4875	fate	3624	place	2012	twist	789	irony	741	cruel	661	twisted	660	jealous	556	sudden	533	cursed	459	blessing	425	beneath	407	reverse	402	alas	360	forced	346	prison	324	wonders	289	hurricane	281	remains	279
1297	hah	10881	:	9615	haha	4216	kong	2574	donkey	1756	hong	1705	ahh	1381	shrek	576	returns	206	lalala	181	disneyland	171	alll	82	hahahahahahaha	64
1294	taking	10083	care	6427	missing	2315	nurse	1945	late	1690	minute	1595	holding	1483	missed	1469	yelled	1200	read	1040	pee	996	lives	963	saving	881	meds	880	pooped	821	starving	785	lunch	764	nurses	696	puked	398	peed	306
1295	school	32128	high	18327	middle	3281	elementary	1967	grade	1916	reunion	1288	graduate	1249	schools	1037	students	813	junior	803	teachers	516	jr	451	classmates	436	hs	430	graduated	409	highschool	401	graduating	352	jobs	256	heating	232	central	229
988	man	25430	son	3631	he's	3485	aw	3074	c'mon	1809	awww	960	dude	587	dang	567	awwww	338	folks	309	decides	295	robot	235	jeez	218	manage	203	realizes	160	invisible	123	comfortable	123	snap	122	porn	110	cmon	107
989	loading	233	error	160	whale	144	attempting	81	delayed	71	unable	66	beep	48	temporarily	47	located	39
982	heart	28236	love	15174	soul	5659	mind	4477	forever	865	loving	793	belongs	644	breaks	574	follow	537	touches	511	tells	487	stole	470	melt	451	desires	409	bottom	343	heartless	310	sacred	307	sings	303	desire	282	treasure	266
983	ur	62251	urself	2422	u'll	1416	coz	994	u've	908	cos	280	urs	179	bcoz	133	wht	103	givin	95
980	grandma	10341	miss	6530	grandpa	4981	nana	2273	rip	2204	granny	1813	grandmother	1420	hospital	1413	passed	1355	died	1175	visit	1171	grandfather	727	yrs	720	homes	588	uncle	447	papa	439	visiting	438	horses	438	grandparents	428	funeral	326
981	love	24670	babe	11178	miss	6504	baby	3913	missing	1859	honey	1048	hubby	910	missin	907	remind	461	sweetheart	355	fiance	321	xoxo	199	ily	170	babes	147	sweetest	144
986	ends	13489	starts	4469	begins	3910	september	1684	wake	1674	meet	1512	we'll	1116	begin	838	earth	758	grows	673	sally	563	corner	529	turns	410	split	364	odds	318	nightmare	297	stops	286	bittersweet	276	we'd	254	victim	237
987	fucking	23425	fuck	10873	shit	5280	pissed	5210	bullshit	2601	goddamn	1772	piss	902	bitch	892	wtf	881	asshole	786	fucked	665	>:	663	pissing	480	shitty	420	pisses	314	bastard	222	stole	188	assholes	187	ruined	159	fuckers	153
984	josh	10240	hanging	1855	joshua	1723	jordan	695	christian	654	turner	556	jake	506	evan	364	ryan	314	noah	311	hung	304	ashley	300	chelsea	299	zach	296	matt	281	ily	249	hangin	247	thomas	246	sara	244	ian	230
985	picture	7600	week	6962	change	6486	profile	5497	famous	3869	told	3621	significant	1335	pic	1316	celebrate	1270	actor	1198	you've	1177	musician	1124	photo	884	update	838	celebrity	836	valentines	572	twin	555	switched	538	alike	497	honor	487
115	plans	18154	making	4225	future	2313	ruined	2143	lord	1595	harm	1314	plan	786	changed	604	ruin	513	turns	418	cancelled	415	arm	398	literally	373	cancel	360	laid	339	ruins	296	ruining	290	planned	288	destroy	268	canceled	240
114	attention	14968	pay	7064	paying	2398	span	1247	giving	1161	simply	762	paid	708	brought	692	seeking	679	detail	481	notice	478	personality	457	tis	441	desperately	429	deserves	380	affection	371	whore	289	mention	287	crave	233	repeat	232
117	christmas	27477	tree	14526	lights	4069	putting	2691	decorations	2308	xmas	2179	decorating	1874	spirit	1388	holiday	1316	decorate	957	decorated	945	presents	769	trees	534	holidays	504	carol	489	x-mas	388	tradition	278	lighting	251	elf	234	underneath	201
116	im	31112	ill	7192	dont	6769	ive	3755	cuz	1820	iv	1305	id	1148	havent	739	youll	418	couldnt	334	alot	319	whos	296	isnt	262	itll	256	coz	169	dieing	150	cus	122	heres	86	tomarrow	68	alll	55
111	i'll	11586	miss	3759	darling	2179	i'd	1900	forget	1549	lie	1454	won't	1328	turn	1133	dose	979	dear	955	swear	940	arms	889	sit	873	heavy	844	whisper	668	atmosphere	651	awake	633	takes	578	stars	509	kiss	471
110	class	18758	yoga	5500	zumba	2739	gym	2549	dance	1416	classes	1302	workout	991	teaching	885	instructor	694	studio	677	mat	626	reunion	503	session	439	spin	348	fitness	342	skipping	322	workshop	200	exercise	166	practicing	143	latin	141
113	sleep	27088	can't	19942	tired	4782	ugh	2542	insomnia	1098	sucks	546	grr	243	grrr	229	reverse	173	grrrr	129	night's	92	overrated	86	snoring	84	nyquil	48	restless	48	refuses	37
112	things	20470	learn	8043	fall	6242	change	4806	wrong	4677	reason	4345	eventually	3286	trust	2986	they're	2484	lies	2048	marilyn	487	monroe	150	confusion	130	theyre	59	no-one	28
119	result	6534	quizzes	3957	:/	3574	aid	3244	personality	2220	http	2157	referrals	2110	heroku	2002	quizme	2001	quiz	1318	character	976	george	909	results	603	irony	285	chase	245	fits	245	tests	232	decade	209	accurate	198	creative	198
118	pokemon	7500	playing	5431	wii	3944	play	2534	ds	2533	fit	1707	nintendo	1364	games	1322	mon	995	legend	942	cards	820	played	584	trade	562	sports	519	version	426	ash	402	original	358	playin	349	shiny	349	master	343
1797	clean	8835	house	8295	cleaned	7072	room	5276	laundry	4987	cleaning	4663	kitchen	3132	dishes	2713	bathroom	2321	floor	1795	vacuum	1608	cleaner	1264	washed	1229	carpet	1186	floors	1021	productive	844	washing	776	clothes	713	bedroom	690	apartment	553
1388	positive	15167	negative	7234	thoughts	4575	energy	2807	stay	2209	attitude	1448	focus	1080	negativity	981	results	906	optimistic	798	vibes	763	outlook	571	situation	568	determined	436	outcome	402	impact	396	influence	380	keeping	342	create	326	attract	312
1796	tonight	6939	jon	4466	awesome	3992	bon	3180	jonathan	1746	erica	1058	concert	1044	stewart	787	enjoyed	753	woohoo	606	definately	471	ross	369	btw	229	sara	178	rocked	171	stephen	169	exited	117	kate	112	fires	71	rally	63
1035	fix	10283	problem	6333	called	2627	problems	1770	messed	1245	fixed	1183	fixing	1174	mess	921	broke	825	needed	822	figure	783	who's	675	bar	619	happened	597	showed	569	figured	469	issues	391	agree	376	lights	331	issue	321
1389	bored	19431	mind	12432	outta	8426	hell	3733	min	2512	outa	1025	sitting	830	skull	494	freaking	467	heck	451	sight	428	freakin	373	sittin	336	usual	267	entertain	200	devil	180	sober	144	flippin	135	friggin	129	lion	91
[truncated: 105 more rows]
