# Supplementary material for: Personality, Gender, and Age in the Language of Social Media: The Open-Vocabulary Approach
Source: PLoS One. 2013 Sep 25;8(9):e73791. doi: 10.1371/journal.pone.0073791 (PMC3783449; doi:10.1371/journal.pone.0073791)
Supplement: Table S2 — Prediction results when selecting features via differential language analysis. accuracy: percent predicted correctly (for discrete binary outcomes). R: Square-root of the coefficient of determination (for sequential/continuous outcomes). LIWC: A priori word-categories from Linguistic Inquiry and Word Count. Topics: Automatically created LDA topic clusters. WordPhrases: words and phrases (n-grams of size 1 to 3 passing a collocation filter). Bold indicates significant (P<.01) improvement over the baseline set of features (use of LIWC alone). Differential language analysis was run over the training set, and only those features significant at Bonferonni-corrected P<0.001 were included during training and testing. No controls were used so as to be consistent with the evaluation in the main paper, and so one could consider this a univariate feature selection. On average results are just below those of not using differential language analysis to select features but there is no significant difference. (PDF) [file pone.0073791.s004.pdf]

**Supporting Table 2. Prediction results when selecting features via differential language analysis.**

| features                           | <b>Gender</b><br><i>accuracy</i> | <b>Age</b><br><i>R</i> | <b>Extraversion</b><br><i>R</i> | <b>Agreeableness</b><br><i>R</i> | <b>Conscientious.</b><br><i>R</i> | <b>Neuroticism</b><br><i>R</i> | <b>Openness</b><br><i>R</i> |
|------------------------------------|----------------------------------|------------------------|---------------------------------|----------------------------------|-----------------------------------|--------------------------------|-----------------------------|
| <i>LIWC</i>                        | 77.7%                            | .65                    | .25                             | .25                              | .29                               | .22                            | .28                         |
| <i>Topics</i>                      | <b>88.2%</b>                     | <b>.79</b>             | <b>.34</b>                      | <b>.28</b>                       | <b>.34</b>                        | <b>.28</b>                     | <b>.39</b>                  |
| <i>WordPhrases</i>                 | <b>91.8%</b>                     | <b>.81</b>             | <b>.37</b>                      | <b>.27</b>                       | <b>.34</b>                        | <b>.28</b>                     | <b>.40</b>                  |
| <i>WordPhrases + Topics</i>        | <b>92.0%</b>                     | <b>.82</b>             | <b>.38</b>                      | <b>.29</b>                       | <b>.35</b>                        | <b>.30</b>                     | <b>.41</b>                  |
| <i>Topics + LIWC</i>               | <b>89.2%</b>                     | <b>.80</b>             | <b>.35</b>                      | <b>.28</b>                       | <b>.34</b>                        | <b>.28</b>                     | <b>.40</b>                  |
| <i>WordPhrases + LIWC</i>          | <b>91.8%</b>                     | <b>.81</b>             | <b>.38</b>                      | <b>.28</b>                       | <b>.34</b>                        | <b>.29</b>                     | <b>.40</b>                  |
| <i>WordPhrases + Topics + LIWC</i> | <b>92.0%</b>                     | <b>.82</b>             | <b>.38</b>                      | <b>.30</b>                       | <b>.35</b>                        | <b>.30</b>                     | <b>.41</b>                  |

*accuracy*: percent predicted correctly (for discrete binary outcomes). *R*: Square-root of the coefficient of determination (for sequential / continuous outcomes). *LIWC*: *A priori* word-categories from Linguistic Inquiry and Word Count. *Topics*: Automatically created *LDA* topic clusters. *WordPhrases*: words and phrases (n-grams of size 1 to 3 passing a collocation filter). Bold indicates significant ( $p < .01$ ) improvement over the baseline set of features (use of *LIWC* alone). Differential language analysis was run over the training set, and only those features significant at Bonferonni-corrected  $p < 0.001$  were included during training and testing. No controls were used so as to be consistent with the evaluation in the main paper, and so one could consider this a univariate feature selection. On average results are just below those of not using *differential language analysis* to select features but there is no significant difference.
